# Supplementary material
Source: Research Square preprint supplement (doi:10.21203/rs.3.rs-9131912/v1)
Supplement: Supplementary file 1 [file 34cb6f8460f3fe779264242b.xlsx]

## Sheet: rat.rna.frag
ID	Definition	Length of transcripts	Dinucleotides used for selective PCR (NN, adjacent to Msp1)	Dinucleotides used for selective PCR (NN, adjacent to Mse1)	Sequences of MspI-MseI	Length of MspI-MseI fragments(bp)	Predicted length of selective PCR products (bp)
NR_002316.2	Rattus norvegicus CB741658 gene (CB741658), long non-coding RNA	3252	GT	TT	GTTTCTTCCAGGAGGCTTCCGATATGTTATAATAAAGGCTGGGCTACTGACCTGTGTAAGAAACGCCCCCCTCCGTGCCTCTCAGCACAGGGACCTGTTCATCTCAACACGCAGGAAGCAGAGGCAGGAGGATGAGTAATTTCAAAAGACAACCTGGTACAGAGTGAGCCCTCTCAAAAAAAAAAAAAAAAAAACCTAAAAGCCTTGACTGTTTTTTCTCTTCGGTTCTGACATCAGTGAAAACTCCATGTTCTGCCTGCACAGAATCGGGAAGAGGGAATCCTGGGGGAATTCATCATT	300	336
NM_001099654.1	Rattus norvegicus vomeronasal 2 receptor, 65 (Vom2r65), mRNA	2541				0	-
NR_128686.1	Rattus norvegicus microRNA mir-322-2 (Mir322-2), microRNA	95				0	-
NR_128696.1	Rattus norvegicus microRNA mir-503-2 (Mir503-2), microRNA	71				0	-
NR_128683.1	Rattus norvegicus microRNA mir-196b-2 (Mir196b-2), microRNA	85				0	-
NR_128675.1	Rattus norvegicus microRNA mir-3084a-2 (Mir3084a-2), microRNA	69					-
NR_128682.1	Rattus norvegicus microRNA mir-190a-2 (Mir190a-2), microRNA	85				0	-
NR_128702.1	Rattus norvegicus microRNA mir-542-2 (Mir542-2), microRNA	79				0	-
NR_130457.1	Rattus norvegicus microRNA mir-466b-3 (Mir466b-3), microRNA	86				0	-
NR_128688.1	Rattus norvegicus microRNA mir-350-2 (Mir350-2), microRNA	99				0	-
NR_128698.1	Rattus norvegicus microRNA mir-6317-2 (Mir6317-2), microRNA	127				0	-
NR_128699.1	Rattus norvegicus microRNA mir-6319-2 (Mir6319-2), microRNA	127				0	-
NR_128695.1	Rattus norvegicus microRNA mir-450b-2 (Mir450b-2), microRNA	69				0	-
NR_130458.1	Rattus norvegicus microRNA mir-466b-4 (Mir466b-4), microRNA	82				0	-
NR_128694.1	Rattus norvegicus microRNA mir-434-2 (Mir434-2), microRNA	81				0	-
NR_128687.1	Rattus norvegicus microRNA mir-340-2 (Mir340-2), microRNA	98				0	-
NR_128691.1	Rattus norvegicus microRNA mir-3543-2 (Mir3543-2), microRNA	115				0	-
NR_128689.1	Rattus norvegicus microRNA mir-351-2 (Mir351-2), microRNA	81				0	-
NR_128692.1	Rattus norvegicus microRNA mir-3556b-2 (Mir3556b-2), microRNA	107				0	-
NR_128684.1	Rattus norvegicus microRNA mir-29c-2 (Mir29c-2), microRNA	88				0	-
NR_128703.1	Rattus norvegicus microRNA mir-542-3 (Mir542-3), microRNA	79				0	-
NR_128700.1	Rattus norvegicus microRNA mir-29b-3 (Mir29b-3), microRNA	81				0	-
NM_001134518.1	Rattus norvegicus proline-rich coiled-coil 2B (Prrc2b), transcript variant 2, mRNA	8522	GT	AT	GTCAGTCCCTGTTGTTTCTCCTTTCAAATATGTGATTGTACTAGGTCTTTCCATATGAAAGAACTCTCCTTAT	73	109
NM_001134753.1	Rattus norvegicus PNKD metallo-beta-lactamase domain containing (Pnkd), transcript variant 3, mRNA	635	GG	TA	GGGATCCTCTCTGGAGCGACAGCTAACAAGGCTTCCCAGAACAGGACCAGAGCACTGCAGAGCCACAGCTCACCAGAATGCAAGGAGGAGCCTGAGCCCCTCTCCCCTGAGCTAGAATACATTCCCAGAAAGAGGGGCAAGAACCCCATGAAAGCTGTGGGACTAGCCTGGGCCATCGGCTTCCCCTGTGGTATCCTCTTCTTCGTCCTCACCAAGCAGGAAGTGGACAAGGACCGCTTGAAGCAGATGAAGGCTCGTCAGAACATGCGGGTGTCCAACACGGGCGAGTATGAGAGCCAGAGGTTCAGGGCTTCGCCCCAACAAGCCCAGTTCCCTGAAGTTGGGTCTGGAGTACAGACCTGAGTAAGGATCATTGCAACCTTGTGCTAGACTTTATTG…	524	560
NM_001134757.1	Rattus norvegicus glucosamine-phosphate N-acetyltransferase 1 (Gnpnat1), transcript variant 1, mRNA	1670	AG	TT	AGCAGTTCATGAAATCTTTTGAGCATATGAAGAAGTCTGGGGATTACTATGTTACAGTTGTGGAAGATGTGACCCTAGGACAAATTGTGGCTACAGCAACTCTGATCATAGAACATAAATTTATCCATTCATGTGCTAAGAGAGGGAGAGTAGAAGATGTGGTCGTTAGTGACGAGTGCAGAGGGAAACAGCTTGGCAAACTGTTATTATCAACTCTGACTTTGCTAAGCAAGAAACTAAACTGTTACAAGATCACCCTTGAATGTCTACCACAAAATGTTGGTTTCTACAAAAAGTTTGACTACACGGTATCAGAAGAAAATTACATGTGTCGGAGGTTCCTAAAGTAAAAACCACCATTGAGAGGTTACTTGATGCTACTGTTTTAGAGTTCATTTT…	524	560
NM_001162931.1	Rattus norvegicus POM121 transmembrane nucleoporin-like 2 (Pom121l2), transcript variant 2, mRNA	2064	TG	CT	TGACAGTCAAGATCTCGCCTCCTGAGCGGAGACCACGGCCCTTGTTCCCAGCCTCAAGAGTGGTGAACTCCGCGGGACCTTCAGAGGAGCCACCAGGCCCCTGTGGAAAGGAACAGGTGCTGAGGGCCCTCCTCGAGTGCAGGAAGGGTGGAGCCAGGTGGGAAGAGCCTCTGTTCCCTGATAGCTCTGACACTCAAAGGAAGTCAGCCACCTTATGGTCTGCCT	225	261
NM_001164439.1	Rattus norvegicus transmembrane protein 212 (Tmem212), transcript variant 2, mRNA	635				0	-
NM_001190346.1	Rattus norvegicus carboxylesterase 2H (Ces2h), transcript variant 2, mRNA	1904	GT	TA	GTCACCATTTTTGGCGAGTCAGCAGGTGGCACAAGTGTGTCTTCACACGTTGTGTCCCCCATGTCCCGTGGGCTCTTCCATGGTGCCATCATGGAGAGTGGGGTGGCCCTGATGTCGAGCCTCATCTCAGTATCTTCTGACGTTGTCTATAGAACAGTGGCCAACCTTTCTGGATGTGAGCAGGTGGACTCCAAGGCTCTGGTGAACTGTCTACGAGGCAAGAGCGAGGAAGAGATTATGTCTA	244	280
NM_001195560.1	Rattus norvegicus calmodulin binding transcription activator 1 (Camta1), transcript variant 2, mRNA	599	AA	TT	AAGAGCGTTTCCCAAAGTGTATTCTGCGGAACTAGCACCTACTGTGTTCTCAACACCGTGCCACCTATAGAAGATGATCATGGGAACAGCAATAGTAGTCATGTAAAAATCTTTTTACCGAAAAAGCTGCTTGAATGTCTGCCGAAATGTTCAAGTTTACCCAAAGAGAGGCACCGCTGGAACACTAACGAGAGATCATGATGCAGCCGCCCTTTTGGATTTCTTT	226	262
NM_001244769.1	Rattus norvegicus family with sequence similarity 110, member A (Fam110a), transcript variant 2, mRNA	1797				0	-
NM_001244770.1	Rattus norvegicus family with sequence similarity 110, member A (Fam110a), transcript variant 3, mRNA	1644				0	-
NM_001244779.1	Rattus norvegicus LIM domain only 2 (Lmo2), transcript variant 2, mRNA	1529	CG	AA	CGCCTCTACTACAAGCTGGGACGGAAGCTGTGCAGGCGAGACTATCTCAGGCTTTTTGGACAAGATGGCCTCTGTGCTTCCTGTGACAAGCGGATCCGTGCCTATGAGATGACGATGCGCGTGAAAGACAAAGTGTATCACCTGGAGTGTTTCAAGTGCGCTGCCTGCCAGAAGCATTTCTGTGTAGGTGACAGATACCTTCTCATCAACTCCGACATAGTGTGTGAACAAGACATCTACGAGTGGACCAAGATCAATGGGATCATCTAGGCCAGAGTCCCAGGCACCTGTGGGGAGGTGTTCAGTGGAGACGCTGGCTCCGCGGTCTTCGGGCTTAGGCACTTTGGGAACCTGAGGGTGGGTGAGGCATTTCTTAGGAGACTATGGACTCTTCCTGGG…	636	672
NM_001244780.1	Rattus norvegicus LIM domain only 2 (Lmo2), transcript variant 3, mRNA	1504	CG	AA	CGCCTCTACTACAAGCTGGGACGGAAGCTGTGCAGGCGAGACTATCTCAGGCTTTTTGGACAAGATGGCCTCTGTGCTTCCTGTGACAAGCGGATCCGTGCCTATGAGATGACGATGCGCGTGAAAGACAAAGTGTATCACCTGGAGTGTTTCAAGTGCGCTGCCTGCCAGAAGCATTTCTGTGTAGGTGACAGATACCTTCTCATCAACTCCGACATAGTGTGTGAACAAGACATCTACGAGTGGACCAAGATCAATGGGATCATCTAGGCCAGAGTCCCAGGCACCTGTGGGGAGGTGTTCAGTGGAGACGCTGGCTCCGCGGTCTTCGGGCTTAGGCACTTTGGGAACCTGAGGGTGGGTGAGGCATTTCTTAGGAGACTATGGACTCTTCCTGGG…	636	672
NM_001244781.1	Rattus norvegicus LIM domain only 2 (Lmo2), transcript variant 4, mRNA	1534	CG	AA	CGCCTCTACTACAAGCTGGGACGGAAGCTGTGCAGGCGAGACTATCTCAGGCTTTTTGGACAAGATGGCCTCTGTGCTTCCTGTGACAAGCGGATCCGTGCCTATGAGATGACGATGCGCGTGAAAGACAAAGTGTATCACCTGGAGTGTTTCAAGTGCGCTGCCTGCCAGAAGCATTTCTGTGTAGGTGACAGATACCTTCTCATCAACTCCGACATAGTGTGTGAACAAGACATCTACGAGTGGACCAAGATCAATGGGATCATCTAGGCCAGAGTCCCAGGCACCTGTGGGGAGGTGTTCAGTGGAGACGCTGGCTCCGCGGTCTTCGGGCTTAGGCACTTTGGGAACCTGAGGGTGGGTGAGGCATTTCTTAGGAGACTATGGACTCTTCCTGGG…	636	672
NM_001270704.1	Rattus norvegicus EH domain binding protein 1-like 1 (Ehbp1l1), transcript variant 3, mRNA	3379				0	-
NM_001270705.1	Rattus norvegicus EH domain binding protein 1-like 1 (Ehbp1l1), transcript variant 4, mRNA	2843				0	-
NM_001270790.1	Rattus norvegicus GDP-L-fucose synthase (Gfus), transcript variant 3, mRNA	1225				0	-
NM_001271301.1	Rattus norvegicus serine palmitoyltransferase, small subunit B (Sptssb), transcript variant 2, mRNA	2160	AT	TA	ATGCTTTGAAATAAAACTTTTCTGGAAGATAGGCTTATAAGAGACATGATGGAGTCATATTTACACTACTCTTTTCATATTATTCCACATGAAAGGATATGTTACAAAAGTATTCTTCATAGGCTACTGTCAAAAGTACCCTGCACTTGTTTACAATTTA	160	196
NM_001314068.1	Rattus norvegicus myelin protein zero (Mpz), transcript variant 1, mRNA	2018	TT	TA	TTCCCCTGGCTCCTTCCTGCTGTCTCCTTTCCTACCTTGTGGTGGCCCAGCTCCACACTCTGTCCTCGGGCTCAAATCCACATCATGCAGATCAGACTCTCCATCAGGGTTTATCTAGGTTGCTGAGTATTTTTTATTTGTTCATCCATCCTTTGTTTACCTGAGCCCACGGCCCCATGACCGAGGACCAATGACGTCATGTGGCTTTTGCAGTTCCCCACTCCTA	226	262
NM_001025117.2	Rattus norvegicus EH domain binding protein 1-like 1 (Ehbp1l1), transcript variant 1, mRNA	2883				0	-
NM_001078648.1	Rattus norvegicus transmembrane protein 134 (Tmem134), transcript variant 2, mRNA	881	TT	CC	TTCTGTCCCTTTCACCTGGAAGACAGAGGCCCTCTGAGACCCTCACCACCACCAGGCCTCTTTGGATTTGCTCAGGAAGTTTGGGACATGCCAGCCTGGGGATATTGCCCTTATCTGATGTGTGCC	126	162
NM_001008843.2	Rattus norvegicus RT1 class I, locus CE5 (RT1-CE5), transcript variant 1, mRNA	1619	AG	TT	AGTATTGGGAGCAGCAGACACAGATCGTCAAGGGACACGAATGGAGTTTCCGAGTGAGCCTGAGGAATCTGCTAGGCTACTACAACCAGAGCGAGGGCGGCTCTCACACACTCCAGGTGATGTCTGGATGTGACATGGGGTCGGACCAGAGCCTGCGCCGCGGGTATGAGCAATACGCCTATGACGGCCGCGATTACATCTCCCTGAACGAAGACCTGAAGACGTGGTCGGCTGCGGACTTGGCAGCACAGATCACTCTAAACAAGTGGGATCAGGCTGGTGAATTAGACTATTACAAGGCCTACCTGGAGGGTCCATGCCTGGAGTGGCTTCTCAGATACCTGGAGCACGGGAAGGAGACACTGATGCGCTCAGATCCCCCAAAGGCACATGTGACCC…	1226	1262
NM_199087.1	Rattus norvegicus serine peptidase inhibitor, Kunitz type, 2 (Spint2), transcript variant 2, mRNA	1230	GC	TC	GCACAAAAGCGGTGATCCTGGTGGGGCTGTTCATCATGGTCCTGATCCTCCTCCTGGGATCCTCCATGGTGTTCCTGATCCGAATGGTTCGCAGAAAGCAGGAGCGTGCTCTCCGCACTGTTTGGAGCACTGCGGATGACAAGGAGCAGCTGGTGAAGAATACCTGTGTCTTGTAGAGGCCCCAGTTCTCAGAGAGCCTGGGGGACACCATGACAGAGCAACGCTTGTGCCTGAGATCATTAGGGAGTTTGGTCTTTGTTTCCCAGCCTGTGGGCTGCGTAGAGCCTCTTCCTGACCTCCCTCCCCACAGCCCTCTGCCCTTCCCCACCTATCGCCTCCTTCAGCGTCACTAGGAGCCCCATTCCTGTAGTC	372	408
NR_024535.1	Rattus norvegicus ALG3, alpha-1,3- mannosyltransferase (Alg3), transcript variant 2, non-coding RNA	1321				0	-
NR_028055.1	Rattus norvegicus neugrin, neurite outgrowth associated (Ngrn), transcript variant 1, non-coding RNA	1728	TA	TT	TATTTACATAAGGAATTTGCAGAGTCCTGGTCAGTTCCCAGGTTGGCAGAAGGCTTTGATGTCAGCACTGATGTTATCCGAAGGGTT	87	123
NR_037147.1	Rattus norvegicus family with sequence similarity 98, member C (Fam98c), transcript variant 2, non-coding RNA	1371	TG	TC	TGGCGGCCTGCGCCTGCTGCGGTTTCTTTGCTCTGAGCTCCAGGCTGCTCGCCTCTTGCATCTAAAGCTCCAGCGTGATCCTAGCCCTGTGCCGTCCTTTGGAGAAGGCACGAAGGAGGGAAATGACGTGGTTCAGGAACTGATGCTAACTC	152	188
NR_045200.1	Rattus norvegicus centrosomal protein 63 (Cep63), transcript variant 3, non-coding RNA	2795	CA	AA	CAGCTCCACCATCTCTCTGCCTTCCAACTCTGTATGTCAGGCTCGCTCTTTGCCTTCAATGCTAGATATAAATGATGCCAACTTTTCTGACAATCTGTCTGACTGTGCGAATGACCAAGAAGAGTTTGTATCTTCGTGCTCGATGCCCGTCTCTCCACTGGGATTGATAGCTACCAGGTTTCTAGAAGAGGAGGAGCTGAGGTCTCACCACATTCTAGAGCGCCTGGACGCCCACATTGAAGAACTGAAAAGAGAGAGTGAGAAGACGGTGAGGCAGTTCACAGCCCTCGTGTAGTGCTGAGCAGCCACACACAGAAGACTGGTTCTAAAGATCTAAGAGCAATGGCTGCAAGAGCAGCACTGAGGAATCTGCAGATCGGGCACTTAGGTATTTTCACT…	532	568
NR_073134.1	Rattus norvegicus AKNA domain containing 1 (Aknad1), transcript variant 2, non-coding RNA	1952	AA	AC	AACTAAAGGTCCAGGTGATAAATACAAAAGCTTCCTGAGGCAGACGCCCCAGAGACAGCTGGCTCACAAAGCTAGTTTAGGCAACGGGTTCAGATACAGCCAGGCTCAAGTGCACTACCAGTTTCCAGATGTTTCTAAGGTTGCTCCCGAAGTGAAGATCCCTCGGAACATTGTAACTAATAAACCACTCACAATAGCTAACCGAGGCAGCTGTTCTCTTAGGTTGAGAAATAAATCAACAGTTGTGCAAGATAATTCAGGAACCCTGTCTGGGTCAAATCGTGTTGAAAAACAACCAGAGCAAAAACGGAAATTTACTGAACCTTTGCAACAAATACAGGTGCAGCCTGCCACACACACCTGCCAAGAACCTCTCACAGGACTGGAACCTGAGAAAGG…	960	996
NR_102354.1	Rattus norvegicus POZ (BTB) and AT hook containing zinc finger 1 (Patz1), transcript variant 5, non-coding RNA	1088	GC	CA	GCTTTTACTCAGTGGCCTGTGGGCTAGCCTGGGTCCTTCTGGAGAGGTGGAGGCGAATGGTGGCTGACTGGAGAGCCCTGCTTTGGCAGAGGCTAGCTAGCGAGACTGTTCCTGCCCACCACTCCCAGATCCTCCCAAGATGTCCGAACATTTTTTTCCAGCTCAAAGCTCTCACATAGCAATAGGAAGGCCCACCTTTCTGAAGGTCCCCCTCCCCTGGTGGGCTCCATGTTCCTTTCTGAATGCTTGTCTCCCCTACCTCAACGGGGCAGCCAACCTTGTCTGGGGATTTAGAAGTTGGGAGTTGTAGGGCA	314	350
NR_029398.1	Rattus norvegicus hypothetical LOC100310783 (Cb707485), long non-coding RNA	385	CT	TC	CTAGCCTTGGACCTC	15	51
NR_102351.1	Rattus norvegicus uncharacterized LOC100910973 (LOC100910973), transcript variant 1, long non-coding RNA	950	AA	CC	AACACCAATAATGTATATGTGCATCGGCCCCAAGTCATCATTGAAAACACAGTGTTCTCAAGTGGACAAGACCTTCCACTGGATTGTTCAAGAGAGATCCAGCCTTACAAGAAGGAAAACTAGAGACCAAAATAAATCCTCTTCCTTCTCGATGGGTATCATCTGCTTCTTCCTTTCCTAAAAGACTGGGGGAGCTATCTCTCATAGTGAGTACATTCAGTGGTGCAAGTGGCTCTCAGAAGTAGACTCATGCCTTGCTTGTATTAGGACTTTACTGAACCCAAATACCACAAAATTCTTTAGCTCAGCCCTGCTAGCC	319	355
NR_102352.1	Rattus norvegicus uncharacterized LOC100910973 (LOC100910973), transcript variant 2, long non-coding RNA	779	AA	CC	AACACCAATAATGTATATGTGCATCGGCCCCAAGTCATCATTGAAAACACAGTGTTCTCAAGTGGACAAGACCTTCCACTGGATTGTTCAAGAGAGATCCAGCCTTACAAGAAGGAAAACTAGAGACCAAAATAAATCCTCTTCCTTCTCGATGGGTATCATCTGCTTCTTCCTTTCCTAAAAGACTGGGGGAGCTATCTCTCATAGTGAGTACATTCAGTGGTGCAAGTGGCTCTCAGAAGTAGACTCATGCCTTGCTTGTATTAGGACTTTACTGAACCCAAATACCACAAAATTCTTTAGCTCAGCCCTGCTAGCC	319	355
NR_102359.1	Rattus norvegicus uncharacterized LOC100910802 (LOC100910802), long non-coding RNA	669				0	-
NR_110672.1	Rattus norvegicus uncharacterized LOC100911177 (LOC100911177), long non-coding RNA	441				0	-
NR_131072.1	Rattus norvegicus rCG57257-like (LOC100365289), long non-coding RNA	1871	TG	TA	TGACCTTGACCCCAGACTTTTGCTTCCTAGGTCAATACCTTGCTGACCTTTTTA	54	90
NR_003722.1	Rattus norvegicus glyceraldehyde-3-phosphate dehydrogenase, pseudogene 1 (Gapdh-ps1), non-coding RNA	1476	CC	AA	CCTCTTCCCCAACCCTGTCCCCTTCCCAAACAGGCCTGGGCACTAGCCCTTGACTCTAACTATAGGACTGCAGTTTCTAAGAGACAGCAGCATCTTCTCCTTCAGTGCTAGCCTCATCCCATAGACAAGATGGTAAAGGTTGGTGTGAATGGATTTGGCCTTATTGGGTGCCTGGTTACCAGGGCTGCCTTCTCCTCTGCAACTGGCAAAGTGGAGATTGTTGCCATCAACGACCCCTTCATTGACCTCAACTACATGGTCTGCATGTTCCAGTATGACTCTACCCATGGCAAGTTCAACGGCACAGTCAAGGCTGAGAATGGGAAACTTGTCATCAATGGGAAGTCCATCACCATCTTCCAGGAGCGAGATCCCGCTAACATCAAATGGGGTGACGCT…	1341	1377
NM_001007754.1	Rattus norvegicus Ras association domain family member 1 (Rassf1), transcript variant 2, mRNA	1603				0	-
NM_001134529.1	Rattus norvegicus potassium channel tetramerization domain containing 17 (Kctd17), transcript variant 2, mRNA	1634				0	-
NM_001106822.1	Rattus norvegicus solute carrier family 35, member F2 (Slc35f2), transcript variant 2, mRNA	2455	GA	TT	GAGAGAGTAGAGCCTGCCACTGCCAAGGGCCTATCTGAGGGGACATCAGCCTCAGAGGGAAAGCCCACTGTATTGGATTACATCAGTGGTTAGATGGTAGAAAGGAACGCTGATCAGTGATTCCAAACTAGAAATACCAAAGCAGAGCAGAGAGTCCGAGGGCAGTGTTTCTGTGTGTTGAGTGCCAGTTCTTGTCACCGTCAGAGAGACCAGTGCAAGGCCCCTTGCTGGGGTCTCAGAGACACATATAAGAAGAGAAGGAAGGATGGGGGACCTGCTTCAGGGCTGTTTAGGTAGTTAGGAGTTGGGACAGTCTGGGATGGTTGTGCAATAAGATTCCTCTGTTGGAAGCCTCACATTTTTGTTCTGCGGGGGCAGTCACTATAAGTATGAGCCTTA…	722	758
NR_002705.1	Rattus norvegicus Z39 small nucleolar RNA (LOC252890), small nuclear RNA	60				0	-
NR_024023.1	Rattus norvegicus high mobility group box 1, pseudogene 2 (Hmgb1-ps2), non-coding RNA	1904	CA	TT	CACTGGGCGACTCTGTGCCTCGCGGACTCGCTGAGGAAAATCCAGTAAACATGGGCAAAGGAGATCCTAAGAAGCCGAGAGGCAAAATGTCCTCATATGCATTCTTTGTGCAAACCTGCTGGGAGGAGCACAAGAAGAATCACGTGGATGCTTCTGTCATCTTCTCAGAGTTCTCCAAGAAGTGCTCAGGGAGGTGGAAGACCATGTCTGCTAAAAAAAAGGGGGAAATTTGAAGATAAGGCAAAGACTGACAAGGCTCGTTATGAAAGAGAAATGGAAGCCTACATCCCTCCCAAAGGGGAGACCAAAGAGAAGTTCAAGGACCCCAATGACCCCAAGAGGCCTCCGTCGGCCTTCTTCTTGTTCTGTTCTGAGTAGCGCCCAAAAATCAAAGGCGAG…	750	786
NM_001110492.1	Rattus norvegicus PHD finger protein 14 (Phf14), transcript variant 2, mRNA	4177	CA	GA	CAATCTTACGAGCACCTAAGGAAAGAAAACCAAGTAAAAAAGAAGGAGGCACACAAAAGACATCCTCTCTTCCTACAGTGCTTTATAGTTGTGGAATTTGTAAGAAGAACCATGATCAGCATCTTCTTTTACTGTGTGACACCTGTAAACTGCATTATCATCTTGGCTGCCTTGATCCTCCTCTTACAAGAATGCCGAGAAAGACGAAAAACAGTTATTGGCAGTGCTCAGAGTGTGACCAGGCAGGGAGCAGTGACATGGAGGCCGAGATGGCCATGGAAACCTTGCCAGATGGAACCAAACGATCAAGGAGACAGA	318	354
NM_001109249.1	Rattus norvegicus eukaryotic elongation factor, selenocysteine-tRNA-specific (Eefsec), transcript variant 2, mRNA	2005	GG	GC	GGTGCACCGATTATTCCCGTGGCAGCCAAGCCTGGGGGACCAGAGGCCCCTGAAACAGAAGCTCCACAGGGCATCTCAGAACTCATTGAGCTTCTGAAGTCCCAGATTTCCATCCCAACGAGAGACCCCTCTGGACCATTCCTTATGTCTGTGGATCACTGCTTCTCCATCAAGGGTCAGGGCACCGTGATGACTGGGACCATCCTCTCGGGCACTATCAGCCTCGGGGACAGTGTGGAGATCCCTGCCCTCAAGGTAATGGATGACTACAGCGTGATTGGACGTTCCCTGTTCAAAAAGGAGACCAACATCCAGCTCTTTGTGGGGC	328	364
NM_001106680.1	Rattus norvegicus target of EGR1, exonuclease (Toe1), transcript variant 2, mRNA	1436	AA	TT	AAATGTGAGCGCGAAAATGGGAAGCAGCGGGCAGCTGGCAGCCCACATGTTGCCCTGGAATTCTGCAGCTATCCTTCTAGCATGAGAGGCCACATTGACTACCGCTGCTGTATGTCCCCTGTGAGCTGCCGTCATTCTCATACCACTGGCATCTGTGACAAGTTCTCGGCCTATGGCTGGTGCCCTCTAGGACCACAGTGTCCTCAGTCACACGATATTGACCTTATAATTGACACGGATGAGGCTGTGGCAGAGGACAAGCGGAGACGGCGGCGACGTAAGGACAAACGGAAGAGGGCTTTGCAGAGTCAACCAGAGACACAGACCTTGGAGGAAGCTGAAGATGGTCCTCCCACAAAGCAGGTCTGTGAAGATAGCCTCAAGACTGAGAAAATTGAA…	479	515
NM_001106691.1	Rattus norvegicus zinc finger protein 46 (Zfp46), transcript variant 2, mRNA	4501	GT	CT	GTATTCATACT	11	47
NM_184051.1	Rattus norvegicus protein kinase AMP-activated non-catalytic subunit gamma 2 (Prkag2), transcript variant 2, mRNA	2232	CC	CA	CCCAAGTGTGAGCATCTTCAAACCTTTACCCAGCTTCCTCCTCTGCACCCAGTGGGTTGAAAAGTTTTCATTTGAGCAGAGGCAACCGAAAACGCCACGTGCTGCTTCTGAGTGCTACGTGTCCTGTTCTGGCTGCCGCGTCGGCGAGGCTGGCTTGGCAACCTCGCTTTATTTATTTTTTTCTCTCATGCAGGTTTTCTACACATCTTTTGGTGAGTGGACTTCACCATACCTACGAATAAAACCTTGATCGTTCTCCTAAGTGGAAAATCTCTCGAGATTTTAGTTTGGATCTGGAAAGGCTATGCCTTCCAAAACAAGCTCCTGGGGCTGGAGAGATGGCTCAGCCA	350	386
NM_001108018.1	Rattus norvegicus Cbl proto-oncogene like 1 (Cbll1), transcript variant 3, mRNA	4045	GA	AT	GATGTAGTGATCCTGTGCAGCGGATTGAACAGTGCACACGAGGTTCTCTCTTCATGTGTAGCATTGTTCAAGGTTGCAAGAGAACATATCTGTCTCAAAGGGACTTACAAGCTCACATCAACCATCGCCATATGAGAGCTGGAAAACCTGTTACCCGTGCTTCACTTGAGAATGTTCATCCTCCTATTGCCCCCCCACCAACTGAAATCCCTGATCGTTTCATAATGCCACCAGACAAGCATCATATGAGCCACATTCCTCCAAAGCAGCACATCATGATGCCACCGCCTCCTTTGCAGCATGTGCCACATGAGCACTATAATCAGCCACACGAGGATATCCGTGCTCCTCCAGCAGAGTTGTCCATGGCTCCACCTCCACCTCGTTCAGTCAGTCAGG…	434	470
NR_024118.1	Rattus norvegicus tenascin XA, pseudogene 1 (Tnxa-ps1), non-coding RNA	793				0	-
NR_033176.2	Rattus norvegicus 5S RNA (Rn5s), ribosomal RNA	120				0	-
NR_002151.1	Rattus norvegicus RT1 class I, locus T24, gene 2 (RT1-T24-2), long non-coding RNA	4485				0	-
NR_002155.1	Rattus norvegicus RT1 class I, locus CE6 (RT1-CE6), long non-coding RNA	951				0	-
NM_001107131.1	Rattus norvegicus ArfGAP with FG repeats 2 (Agfg2), transcript variant 2, mRNA	2742				0	-
NM_001135903.1	Rattus norvegicus zinc finger protein 707-like 1 (Zfp707l1), transcript variant 3, mRNA	1898	CC	CT	CCCTATGTGTGCAGTGACTGTGGGAAAGCCTTCAGTCAGAAGTCAAACCTCCTGCGGCACAAGCTTGTTCACACAGGAGAGAGGCCTTTCTACTGTGACAACTGCGGCAAGACCTTTCGAACTAAAGAGAACCTCAACCACCATCAGCGGATTCACAGCGGAGAGAAGCCCTACACATGTGGCATGCAGGAGTTGGAGCCTGAAGTTGACTGTCAAGGAAAAGGAAAAAAGATCCCACAAAACCTTCTTCCGCCTGACACCTGGTGGGCCTTGGAATAACGAAGTCCACCAAGTTCGGGGAAGATCGGGATCTCACACAGGACCCTAGAAAACTTCTGAGACTCCTTTCTCTGTTGAACATGGAGGAATCT	371	407
NM_001108762.1	Rattus norvegicus COMM domain containing 4 (Commd4), transcript variant 2, mRNA	769				0	-
NM_001109572.1	Rattus norvegicus transmembrane protein 179B (Tmem179b), transcript variant 2, mRNA	740	AC	TT	ACCCAGGCCTCCTTCGGTGGTAGCTGTCCCTTGTATGGTGCGGTTGCACTCAATGGCACCTATCTGGCCTTGTCACATCCCTCAGCCTCTTCCCTCTGCTACTTTGTGGCAGGAGCTTCAGGCATCCTGGCGCTCTACTGCCTTCTCCTCCTCTTCTTCTGGGTCTACAGCAGCTGCATCGAGGACTCCCAGAGCTGCTCTGAAGCCCAGAAAATCTCATGGAAACCTCCAGGAACTGCTGTGCAGTTTTACTCCAACCTACACAATGCTGAAACCTCTTCTTGGGTGAATCTGATATTGTGGTGTCTGGCCTTGATGCTCCAGGTCATGCAGTGCAAGTTTCAAGCGACACCATACCAGCCCCAGGAGAGGGGTGACCCAGAGTGGAGCTCTGAGACT…	483	519
NM_001100680.1	Rattus norvegicus Ral GEF with PH domain and SH3 binding motif 2 (Ralgps2), transcript variant 2, mRNA	1570				0	-
NM_001006959.1	Rattus norvegicus nitric oxide associated 1 (Noa1), transcript variant 2, mRNA	2257	AA	CG	AATGGTTCTATTTTTGGGTGGTATAGCCCGAGTAGATTTCCTACAGGGAAATCAATCAGCCTGGTTTACAGTTGTGGCTTCCAACTTCCTTCCCGTTCATATTTCTTCCTTGGACAAGGCAGATGCTCTATATGAGAAACATGCAGGTCAGGAGTTACTGCTGGTTGGGTTGCAGTAACTCCTTATTCTGAGGGCACACTGCATCTCCGAGCTTACACACCTGAAGGGACTGCTCTGACTGTCCACCCCCCTGTCTTGCCATATATCG	268	304
NM_001127557.2	Rattus norvegicus radial spoke head 14 homolog (Rsph14), transcript variant 1, mRNA	1754				0	-
NM_001012216.1	Rattus norvegicus transmembrane channel-like 5 (Tmc5), transcript variant 2, mRNA	3044	CT	CA	CTGCTCCATGAACAGATCA	19	55
NM_001108143.2	Rattus norvegicus RNA binding motif protein 7 (Rbm7), transcript variant 2, mRNA	1411				0	-
NM_001106895.1	Rattus norvegicus transcription factor AP-2 delta (Tfap2d), transcript variant 2, mRNA	1243	AA	AC	AAGACGGAAAGCAGCCAACGTTACCTTGCTCACTTCCTTAGTCGAAGGAGAGGCTTTGCACTTGGCTAGGGATTTTGGCTACACATGCGAAACAGAGTTTCCAGCCAAGGCAGTAGGAGAACATCTCGCCAGACAACATATGGAACAGAAAGAACAGACAGCACGGAAAAAGATGATCCTAGCGACCAAGCAAATTTGTAAAGAATTCCAAGACCTCCTGAGTCAAGATAGATCACCACTGGGATCCTCCCGACCGACTCCCATTCTAGACCTTGACATCCAGAGGCAC	289	325
NM_001134728.1	Rattus norvegicus sperm associated antigen 16 (Spag16), transcript variant 2, mRNA	1579	AA	TC	AAGCTCATTCCAATCGTGTCCATTGATGTGGGTCCAAGTCCTGGCAACGAGGTGAATTTTGACCCATCAGGTCGAGTTTTAGCTCAGGCGAGTGCCAACGGGATTATCCATTTGCTGGATC	121	157
NM_001164718.1	Rattus norvegicus prefoldin subunit 6 (Pfdn6), mRNA	588				0	-
NM_001004073.1	Rattus norvegicus LSM2 homolog, U6 small nuclear RNA and mRNA degradation associated (Lsm2), transcript variant 1, mRNA	737	GG	TG	GGGAGAACGGAAAGCTAGTCTTGCATTTCCGTGCTGGAGATCAGGATTTTGTGAGGCTCTTCTACTCCTTTTTCAAGTCCCTTGTGGGCAAGGATGTAGTCGTGGAACTCAAGAATGATCTGAGCATCTGTGGAACCCTGCACTCTGTGGACCAGTACCTCAATATCAAACTAACCGACATCAGTGTCACAGACCCTGAAAAATATCCTCACATGTTATCCGTCAAGAACTGCTTCATCAGGGGCTCGGTTGTCCGCTACGTGCAGCTGCCAGCAGACGAGGTGGACACACAGCTGTTGCAGGATGCAGCAAGGAAGGAAGCCCTTCAGCAGAAACAGTGATGGCGCCTTTCCCCTCCCCTCACTTCCCCATCGGTGACCCATAACTTGATGTCCAACC…	443	479
NM_001014050.2	Rattus norvegicus family with sequence similarity 110, member A (Fam110a), transcript variant 4, mRNA	1844				0	-
NM_001270789.1	Rattus norvegicus GDP-L-fucose synthase (Gfus), transcript variant 1, mRNA	1354				0	-
NM_001301297.1	Rattus norvegicus ornithine decarboxylase antizyme 2 (Oaz2), transcript variant 2, mRNA	1825	CA	GG	CATTTTGTGTCTGGCCTGGTGTAAGCAGGTCTGACCTTGCTTTCTTTACAGCTTAGTGTTATTCAGGCATTTGG	74	110
NM_001318190.1	Rattus norvegicus mitogen activated protein kinase 10 (Mapk10), transcript variant 1, mRNA	2759	GC	GA	GCTACCACATGGTCCCTGTCATGTGACCTATTACTCTGACATAAATCCATCTGTAATATATTGCCAGTATATAAGCCGTTTAGTTTGTCAATTGA	95	131
NM_001014220.1	Rattus norvegicus SP100 nuclear antigen (Sp100), transcript variant 2, mRNA	1662	AT	AA	ATCACCAAATCACCTTGGAGCTGTGCAACTCAACCATGACCTCCAAA	47	83
NM_001106693.1	Rattus norvegicus eukaryotic translation initiation factor 4 gamma, 3 (Eif4g3), transcript variant 1, mRNA	5307	AT	AT	ATGTTTTTTGATTGCCTGTATGATGAGGAGGTGATATCAGAGGATGCCTTCTACAAATGGGAGAGCAGCAAGGACCCTGCTGAACAAAACGGGAAGGGCGTAGCCCTCAAATCTGTCACAGCGTTTTTCACGTGGCTTCGGGAAGCAGAAGAGGAGTCGGAGGATAACTAATACTTCAAATACACAAACGAAACAAAAGAAACAAT	206	242
NM_001098239.1	Rattus norvegicus aspartate-beta-hydroxylase (Asph), transcript variant 2, mRNA	1774	AC	AA	ACACATCATTCTGAGTTCTGTGTGTTGTCAAGAA	34	70
NM_058210.2	Rattus norvegicus splicing factor 1 (Sf1), transcript variant 2, mRNA	2762				0	-
NR_073042.1	Rattus norvegicus histamine receptor H3 (Hrh3), transcript variant 9, non-coding RNA	2788				0	-
NR_001567.1	Rattus norvegicus telomerase RNA component (Terc), telomerase RNA	388				0	-
NM_001024287.1	Rattus norvegicus similar to human chromosome 11 open reading frame 16 (C1h11orf16), transcript variant 2, mRNA	1255	GC	AG	GCACTGTTCTCTTGGGCTTGAAGAAACAAAAAGGACAAAGAGCATCTAAAGAAAAAGAAATCCCTGTTCACTTTTGGAATGGCAAGACAGCTAAGGTGCCTCTGGACAGGGTCAGGAAG	119	155
NM_001033757.1	Rattus norvegicus cyclin-dependent kinase inhibitor 1C (Cdkn1c), transcript variant 1, mRNA	2081	AG	CT	AGATGGCTGCGCAGAGCAGCCCACGGTTTTGTGGAAATCTGAAAACTGTGCAATGTATTGAGAACACTCTGTACCATGTGCAAGGAGTACGCTGGTCCCAAGGTGTAAAGCT	112	148
NR_073161.1	Rattus norvegicus ribosomal protein S7, pseudogene 20 (Rps7-ps20), non-coding RNA	1323				0	-
NM_001108816.2	Rattus norvegicus phosphatidylinositol glycan anchor biosynthesis, class A (Piga), transcript variant 2, mRNA	759	GA	TC	GAGAGATACCAGCTGCACGACAGGGTGCAACTTTTGGGAGCTTTAGAACACAAGGATGTTAGAAATGTCCTAGTTCAAGGACATATTTTTC	91	127
NM_001108172.1	Rattus norvegicus Ttk protein kinase (Ttk), transcript variant 2, mRNA	2909	AG	TT	AGATTCCAGAAAGAAGGCACAAGCAGTGGCAGTCTGCCAGAAAGCCAGGCTGTGGGATCCAGAACTCGGCTGCCTTTGCCCCCCAGTGGCACGTTCCAGATGTAACCCCAAAGGCTGATAAAGAGTCACCACCATTATCAGTTCCTAAATGGATTGATCCAAAGTCTGTCTGTGAGACACCTAGTAGCAGTTCCTTGGATGATTACATGAAATGTT	216	252
NM_001106865.1	Rattus norvegicus CTD small phosphatase like (Ctdspl), transcript variant 2, mRNA	4123				0	-
NM_001013929.1	Rattus norvegicus ATPase H+ transporting V1 subunit H (Atp6v1h), transcript variant 2, mRNA	1683	GG	TT	GGCAAACGGGTTATTGAGCAGCTCGGTGGGAAGCAGCTGGTGATGAACCACATGCACCATGAAGACCAGCAGGTCCGCTACAATGCTCTTCTGGCTGTGCAGAAGCTCATGGTGCACAACTGGGAGTATCTTGGTAAACAGCTCCAGTCGGAGCAGCCCCAGACTGCTGCTGCTCGAAGCTGAACTGACTTCTTCAGCCTTTCTGCACCTCCAATGGACCACTGGAGTGAGAACCTCAGTCTTTAGGGTCAAAAGCAAATAGTTT	265	301
NM_001316877.1	Rattus norvegicus malate dehydrogenase 1 (Mdh1), transcript variant 1, mRNA	1878	AG	CA	AGGGCGAGTTCGTGTCGATGGGCGTAATCTCTGATGGCAACTCCTATGGTGTCCCTGATGACCTGCTCTACTCGTTCCCTGTCGTGATCAAGAATAAGACCTGGAAGTTTGTTGAAGGCCTCCCCA	126	162
NM_001108930.1	Rattus norvegicus V-set pre-B cell surrogate light chain 3 (Vpreb3), transcript variant 2, mRNA	513	CC	AG	CCGACATCCCTGACAGATTCTCAGCGACGATGGACGTGGTCCACAATGCCTGTGTACTCACCATCAGCCCCGTGCTGCCAGAGGACGACGCTGACTACTTCTGTTCCATTGCCCACTTTGAACCCTAAGCTGGGAGGCCCCTGACCTTGGGCCTCCTCTTTTTCTCTCAGTCTTGCTTTCTTTCCTCTGCAAAAAGAG	198	234
NM_001013036.1	Rattus norvegicus guanosine monophosphate reductase 2 (Gmpr2), transcript variant 1, mRNA	2167	GC	AT	GCACAGTGAATCAGGTGGTGAACTCATTGAGAGAAATGGCAAGAAATACAAGCTCTTCTATGGAATGAGTTCTGAAATGGCTATGAAGAAGTATTCAGGAGGCGTGGCTGAGTACAGATAAATCTGAACCCTTTACAAAGAAGTAAATATGAAAAGGGTCTCAACCAGCTCTAAGAGGAGCCTGGTATGTTTCTGAGGGATGACCCACACAGACTATGTAAGTATCAATTCCCCTTCTTCCCATCAAGACACTGAAAGAAATCAAGAT	268	304
NM_001037546.1	Rattus norvegicus FYVE, RhoGEF and PH domain containing 1 (Fgd1), transcript variant 2, mRNA	3289	GA	TT	GAGCAGTCCAGCCTGTAGCCAACATACACCCCAGCGCAGGAGGTCCATCCTAGAGAAACAGGCCTCAGTGGCTGCTGAGAACAGCGTCATCTGCAGCTTCCTGCACTACATGGAGAAGGGTGGGAAAGGATGGCACAAGGCATGGTTTGTGGTTCCCGAGAATGAACCCTTGGTGCTGTACATCTATGGAGCCCCTCAGGATGTGAAAGCCCAACGCAGCCTGCCCCTCATTGGCTTTGAGGTGGGGCCTCCTGAGGCAGGGGAGCGGCCAGACAGGAGGCATGTCTTCAAGATCACCCAGAGCCACCTAAGCTGGTACTTCAGCCCAGAGACAGAAGAACTCCAGCGGCGCTGGATGGCTGTGCTTGGCAGGGCGGGCCGTGGGGACACATTCTGCCC…	650	686
NM_001372090.1	Rattus norvegicus sirtuin 1 (Sirt1), mRNA	3184	AG	AG	AGTGTGCTGGAGGATCTGGAGCTGACGGAGGGGATCAAGAGGCAG	45	81
NM_001107269.1	Rattus norvegicus WD repeat and FYVE domain containing 2 (Wdfy2), transcript variant 1, mRNA	6069	GG	AC	GGCGACAATGTTGAGGAAAC	20	56
NM_001108349.1	Rattus norvegicus RCSD domain containing 1 (Rcsd1), transcript variant 1, mRNA	2598	GA	TT	GATGATGAGAACAAGGGAAGTGATTGGTCCATCCCATCCCATGCTGCCCTGTTACAGGAACTCCCTCAGAGAGGCAGGGTATGACATTGTGGCTTTGTGCTTCATTTCCCCCCTGAAGGTGCAACAGTATCTGCCTCCTCCAAGCACTGGTTGCACTCTCCTACAAGGTTACACTTGAACAGGAAACTGGCTAACCTCTGGGACAGGTGCTGAGTGTCCACAGCGCAACTTACCTTCTGAGAGCATCCTCCCTCGTAGCTTCTCTATGAAGCGTTTGTTTGTTTGATCTTGATTTTTTTTTT	302	338
NR_038078.1	Rattus norvegicus small nucleolar RNA host gene 4 (non-protein coding) (Snhg4), long non-coding RNA	253				0	-
NM_031589.2	Rattus norvegicus solute carrier family 37 member 4 (Slc37a4), transcript variant 1, mRNA	2110	GT	AT	GTAACGGTGACCAGCGACTCGCCCAAGATCTGGATCCTGGTGTTGGGAGCCGTGTTTGGTTTCTCTTCTTATGGTCCCATTGCCTTGTTTGGAGTCATAGCTAATGAGAGTGCACCTCCCAACTTGTGTGGTACCTCTCATGCTATTGTGGGGCTCATGGCCAATGTGGGTGGATTTCTGGCTGGGTTACCCTTCAGTACCATCGCCAAGCACTATAGCTGGAGCACAGCCTTCTGGGTGGCAGAAGTGATCTGTATAGCCAGCACAGTTGTCTTCTTCTTGCTTCGAAATATCCGCACCAAGATGGGCCGAGTATCCAAGAAGGCAGAGTGAAAAGAGCACTCACTATAGAGCATCCCCAACTGCAACCTCATTGGCAGGACACAGAAAGGAAGAGAG…	505	541
NR_045097.1	Rattus norvegicus CEA cell adhesion molecule 6 (Ceacam6), long non-coding RNA	1979				0	-
NM_001393766.1	Rattus norvegicus filaggrin (Flg), mRNA	23687	GA	TG	GATCGGGCAAGGGCAGACCTCAACCACTCACAGGAGGGCAGGCTCCAGCTCAGGGAGCCAGCAGGCCTCTGTTGAAGGTTCTGATGGCTATGATTCTATTG	101	137
NM_001008856.1	Rattus norvegicus RT1 class Ib, locus O1 (RT1-O1), mRNA	546				0	-
NM_001108835.1	Rattus norvegicus heat shock protein family B (small) member 9 (Hspb9), mRNA	646	CA	CC	CAAGCGGCAACAGGAGTCGAATGACCCGTCCAGAGGCCGCTACCGCCTGGAGCAGAGTGTGCACCGACAAATGCAACTCCCGATGACCTTAGATCCTGCAGCCATGACATGCAGCCTGACCCCCTCTGGCCATCTGTGGTTCAAGGGACAAAATAAGTGCCTACCTCTCCCTGAAGCCCAAACAGGCCCCCAAACAGGCCAGGCCTTGAGATTCAAGAGGGGAAGTTCTAAGTGCCCCAACCCACC	246	282
NM_001107203.3	Rattus norvegicus F-box protein 28 (Fbxo28), mRNA	1523	GC	GT	GCAGAGCGAGGAGTCTCCTCGGAAACGAAGGAAGGCAACAGAAGCCATAGACTCACTTAGGAAATCCAAACGACTGCGGAATAGGAAGTAAACTGGAATATGGCTCTAGCTCCAGAGGAAGACATCCATGGCTGAGAGT	139	175
NM_001024781.1	Rattus norvegicus SRY-box transcription factor 18 (Sox18), mRNA	1643	AT	AT	ATGCCACTGCACTCCCCTACCATGTGGCACTGGCCAAACTAGGTCCGCGTGCCATGTCCTGTCCAGAGGAAAGCAGCCTCATTTCTGCACTGTCTGACGCCAGCAGCGCGGTCTATTACAGCGCTTGCATCTCAGGCTAGACACTGTCCTCCTTGCCCTCCACTGCTTCTGCATGTGGCCAAGTGGCAGGGCCTTGCCTGCTTCCTTCCTTTCGCATATGTATGTTAGAGTATGCAGCAGCATTTAGAGCTGGTGGCCTAAGGGTGCCACTTCTGTCGCCTCCTCATTTACACACCTCCTTCTGGGGGCTCCTGTGAGTTGGGCCTTCCCTAGGAACCTCAGGCCCTGGACTTGCTAGCAGCCTCTGTCAGGGTTGTTTTTGAATCATCTAATTCTTTC…	508	544
NM_001012099.1	Rattus norvegicus XK related 8 (Xkr8), mRNA	2671	CT	GT	CTGCACCCTAGCTGCAGCTGGGAACCCGACTTTGTGGATGGGACCCTAAGACTCCTCCCTCCCGAGCGTCCTCCAAAGCTGATTTATAACAGGCGTGCCACTCGGTTAGCACAGAACTTCTTTGCCAAGCTCAAAACCCAGGCCGCCCTGCCACAGGCGGTACAGCTGAACGGAGTCCTCTGAGGCAGGGTCTGATTCAGCCAGTGAGGAAGATGAGGAGAGTGGGGCCTTGCAAGGGACAAGGGGGCCAATCATGTGCAAGCCAGTTTTTTTCCTCTCCAACCGATAGAGCTTCCATTGCCAAATCTTCAGTTGTTACCACTTTCACCTCTCACGTGATTGGTGGCGTCCTGGTTCCTGGTTCCCTAGCCTGCTCTAGATGACAGACTCTGGGGGATG…	718	754
NM_001106809.1	Rattus norvegicus VPS26 retromer complex component B (Vps26b), mRNA	3576	GA	GC	GACGTGGTGCTCTGAAGTTTCTACAGTCACCTCTGGCCTCTCACTACTGGGACCAGACCCTTCTCCATCTTCTCTAGCTTGTCAGAAAATATACAGGAACAGAAGC	106	142
NM_001107589.1	Rattus norvegicus ankyrin repeat domain 2 (Ankrd2), mRNA	1116				0	-
NM_201425.2	Rattus norvegicus UDP glucuronosyltransferase family 1 member A9 (Ugt1a9), mRNA	2228	AA	TG	AAATGCTTTGGGGGAAAGGGTCGAGTGAAGAAATCACACAAATCCAAGACCCACTGAGAAGTGGCAGGAAGTGAAGGAGAAGTATTAGTCCCTTATCCAATCAGTTGAAACTTGGAAACAAGTG	124	160
NM_001108328.1	Rattus norvegicus zinc finger protein 358 (Zfp358), mRNA	2031				0	-
NM_183334.1	Rattus norvegicus lactate dehydrogenase A-like 6B (Ldhal6b), mRNA	1442	AG	AA	AGCAGTGGGGCAATGTCCACAAAGAAGTCATTGCCAGTGCCTATAAAATTATCAAAATGAAAGGCTATACTTCCTGGGCCATTGGCCTGTCTGTAGCTGATATTGCAGAGAGTATTCTGAAGAATCTCAGGAAAACGCACCCAGTTTCCACCAAAA	156	192
NM_001108769.1	Rattus norvegicus F-box and leucine-rich repeat protein 22 (Fbxl22), mRNA	4460				0	-
NM_001044235.2	Rattus norvegicus Fcf1 rRNA-processing protein (Fcf1), mRNA	714	AA	AA	AAGATCCCTGGTGTCCCAATCATGTACCTTTCTAACCACAGATACAACATCGAGCGGATGCCAGATGATTATGGAGCCCCTCGCTTCTAATTCTCACTCCACAGAATCTGCCTGCTGTTCTTGGACCAGCTTTCTCTCATCAA	143	179
NM_001106236.1	Rattus norvegicus biliverdin reductase B (Blvrb), mRNA	884				0	-
NM_199503.1	Rattus norvegicus protocadherin alpha 1 (Pcdha1), mRNA	5244	AA	TT	AATATCAGCTCATAGAAAGTAATAAAATTTGCTGTTACCATAAATAAGACATT	53	89
NM_001108563.1	Rattus norvegicus synaptophysin-like 2 (Sypl2), mRNA	3403	AC	AT	ACCCAGTGGGAGAGGATAGAGTTGCCTATTGCAGCACCAAGGAAGAAAGTCAGGAAAGTTGCTGGCAGAATACGTTTTCTGTCCCCTCAGCCCTCCCTCTCCCTCAGCTGGAACACTTTCAGTAGTGCCCTACACTCCACTTATTCATGAAACCCCTTACACCCTTCTCCTTCTCAGCCTTGGTTTTGTCTCACACTTCGGAAACAAGATGGAATGGCTTGGAACATTTCCCCTTCATTTTCCCATCCCCACCACACCTGTGGGCCCTTCTCCCTTCCCCAACCTTTTGGAGATGAGGCAT	301	337
NM_001005890.2	Rattus norvegicus C-type lectin domain family 4, member A1 (Clec4a1), mRNA	1230				0	-
NM_001127451.1	Rattus norvegicus RNA guanine-7 methyltransferase activating subunit (Ramac), mRNA	812				0	-
NM_001108074.2	Rattus norvegicus fizzy and cell division cycle 20 related 1 (Fzr1), mRNA	1821	AG	CA	AGACCCCAGAGTCTCA	16	52
NM_001108168.1	Rattus norvegicus bone morphogenetic protein 5 (Bmp5), mRNA	3708	CA	AG	CAGATTTTGTTATGTTTTTGCAAGAAGTCGGAAGCTTCAGGCTTGGGTCTAGGTCCACCTGGTTCCAAACCGACACTCCAAAGTACAATACAACCTTACCTCAATGAACCGTCTGACCATTGTCTACACCACTACCACAACAGTGGGTTTCTTTCTTGTTTCAAACGTAAGCCAAAG	177	213
NM_201992.1	Rattus norvegicus Fc alpha receptor (Fcar), mRNA	1742	AT	CA	ATAGGTATGGCTGGGCTGGTCCTTGTCATACTCTTGGTGATAGTATCTGAAGATTGGTACAGCCACAGGATCTCACACAAGGAATGCTGTCAGGAACGGGCTGCAAAGAGATGGAGCAAACAGGGTGTCAGACCTAGTGACTGTAGATAAATACTGGGAACCACAGGTTCTTGCAAACAGGAAAAGCCA	189	225
NM_001106022.1	Rattus norvegicus prolyl-tRNA synthetase associated domain containing 1 (Prorsd1), mRNA	1030	AG	CC	AGGTGTTTACAGTTGAAGAAATGATGCCTCATATTCAACATTTGAAAGGAGCACATAGTAAGAACTTATTCC	72	108
NM_199506.1	Rattus norvegicus protocadherin alpha 6 (Pcdha6), mRNA	5289	AA	TT	AATATCAGCTCATAGAAAGTAATAAAATTTGCTGTTACCATAAATAAGACATT	53	89
NM_001108755.1	Rattus norvegicus SWIM-type zinc finger 7 associated protein 1 (Swsap1), mRNA	1959	TT	TT	TTACCTCTGTGTGTTGACTTACCGACTGTTAGGGTCTAGTCATACACATGAGCTTACACAGCACTCAGGGTGTGCAGTTGGGAGTGGATTCGTTCCATGTAGAGTATGCATACATCTAGCTTTCTTAGGACATACATTT	139	175
NM_001106593.1	Rattus norvegicus mitochondrial assembly of ribosomal large subunit 1 (Malsu1), mRNA; nuclear gene for mitochondrial product	747				0	-
NM_001013093.1	Rattus norvegicus UBX domain protein 10 (Ubxn10), mRNA	1681	GG	GA	GGAAGAGCCCTCTGGAAAACTCCCTTGTAGCCCCCACATTCTCTCCTGCAGCCACAGGGAAGTCTACATCTGTCCCTAAGACAGTGGCTGCAGCCAGGATATCTCCTTTCCCCTGCTGGCTCCTTCCAGAATCTACTGCCAGTGCAGTGAATTCTGAATCTCTCAAAGCCAAAACTCTGCCTTTCTGTACTGGATACCAGA	201	237
NM_001109013.1	Rattus norvegicus PRA1 domain family, member 2 (Praf2), mRNA	1352	GT	CC	GTACATTCGTCCACTGCACACCCTCCTGAGCGCACTGGTAGTGGCGGTGGCCCTCGGGGTGTTGGTGTGGGCTGCTGAAACCCGTGCTGCTGTGCGCCGCTGCCGTCGCAGTCACCCTGCTGCCTGCCTGGCTGCAGTACTTGCCGTTAGCCTCTTCATTCTCTGGGCCGTGGGCGGCGCTTTCACCTTCCTGCTCTGCATCACAGCGCCTGTGCTTTTGATCCTGCTGCATGCTTCACTGCGCCTGAGAAACC	254	290
NM_001130544.1	Rattus norvegicus secreted Ly6/Plaur domain containing 1 (Slurp1), mRNA	597				0	-
NM_001012193.1	Rattus norvegicus retinol dehydrogenase 11 (Rdh11), mRNA	1647	CA	AG	CACAGTCCACTCTGAACTGATTCGGCACTCGACTGCTTTGAAATGGCTTTGGCAGCTTTTCTTCTTTTTCATCAAGACCCCTCAACAGGGAGCCCAGACAAGCCTGTACTGTGCCGTGACAGAAGGTATCGAGGGCCTAAGTGGAAGTCATTTCAGTGACTGCCAGTTGGCATGGGTCTCTAGCCAAGCTGGCAATGAGACAATAGCCAGACGGCTATGGGATGTCAGCTGTGACCTGCTGGGCCTCCCTATGGATTGGTAAGTAGTGGCGGTTTGGCTCAAAAGAAGATTGGAAGAGCTGATGATTGTCCTTCAAAGTGGCCAAAACCTTGAAGATGAAGAAGGCAGAACTTCAAGCCTCGCCTGCTTGGCATCCAG	378	414
NM_001106192.1	Rattus norvegicus chromatin licensing and DNA replication factor 1 (Cdt1), mRNA	2239	GC	CC	GCTTGGGAAAGCTGCGAGAGCTCGGAGCC	29	65
NM_001108537.1	Rattus norvegicus general transcription factor 3C subunit 6 (Gtf3c6), mRNA	1553	AT	AG	ATAGGGGACGCCGCTGCCCGTATCTAAGATGGCGGCTGCAGGGGGCGTGGCCAGCGATGGAGTCTCTGAGCGCTATGGCGGCGGCAGTGGATCCCAGTTGGGAGGACGAAGATGAGGAGGAGGAAGAAGAGGAGATAGAGGAGGAGCAGTTTGTTCTGGTGGAATTGTCAGGAATTATTGATACAGACTTTCTCTCCAAATGTGAAAATAAATGCAAGATTTTGGGAATTGACACCGAGAGGCCCATCCTGCAAGTGGACAGCTACGTTTTTGCTGGGGAATATGAAGATACTCTTGGGACCTGTGTTATATTTGAAGAAGGCGTTGAACGGGTGGATCCAGAAGGGAATGATAAAACGGTGCTGAAGTACAAATGCCACACCATGAAGAAGCTCAGCA…	921	957
NM_001127554.1	Rattus norvegicus nudix hydrolase 16 (Nudt16), mRNA	1274	TT	GT	T	1	37
NM_053715.2	Rattus norvegicus solute carrier family 5 member 3 (Slc5a3), mRNA	2451	TA	CT	TATTGGAAGTTCATAGACTGGTTTTGTGGCT	31	67
NM_001170539.1	Rattus norvegicus STT3 oligosaccharyltransferase complex catalytic subunit B (Stt3b), mRNA	2724	TT	CA	TTTTGACCGAACACGTAATGCTGAGATCGGAAATAAGGACA	41	77
NM_001107676.1	Rattus norvegicus proline and serine rich 1 (Proser1), mRNA	4431	CT	TT	CTGCATGTGGCCCTGGGGGGGAGTTATATTCCTCAGATGCATGTTAGCATCAGCTGGCACACAGTATCCTGTGTGTATCCACAACAGGGGGCTTGAGATGACTGTTACTT	110	146
NM_001106603.1	Rattus norvegicus chaperonin containing TCP1 subunit 7 (Cct7), mRNA	2486	GG	TC	GGCAGAGGCCAGGGCCGCTTCCATTGAGAGGCAGTCCGCATACCTCCTTGTGAGGTGTATTGGGGGGTGAGAAAAATGGTTAGTC	85	121
NM_001107146.2	Rattus norvegicus replication factor C subunit 5 (Rfc5), mRNA	1644	GC	CT	GCACCCACTCAAGACGGATATTGCCAATATTCTAGACTGGATGCTGAATCAAGACTTCACCACTGCCTACAAAAATATCATGGAGCTGAAGACTCTGAAGGGCTTGGCACTGCACGACATCTTGACAGAGGTTCACTTGTTTGTGCACAGAGTTGACTTTCCGTCTTCAGTTCGGATGCATTTATTGACCAAAATGGCAGACATTGAGTACAGGCTCTCTGTCGGCACCAGTGAGAAGATCCAGCTGAGCTCCCTCATTGCTGCTTTTCAAGTTACCAGGGACTTGATAGTTGCAGAGGCCTAGAAAACCCAAGGCCTGAGTTGCAGAAGCCTAGAAACTTGGCCCTTGCTCAGGCCCATCGGTGACTGGAGGACAGAAGACATGCTGCCCTGGGCCAG…	486	522
NM_001108226.1	Rattus norvegicus Wnt family member 6 (Wnt6), mRNA	2063	TT	TT	TTACCAAGGCAGAAAGGAGTGAGGGAGGAATTGTGGAAAGACAGAACGGGGTGAGGAAACCTCGCATCCCTCCTTTAGCCCTTTTTGTTCTTTCTTGACTCTTGAGAACATGTCCCATT	119	155
NM_001107594.1	Rattus norvegicus NK2 homeobox 3 (Nkx2-3), mRNA	1472				0	-
NM_001105884.1	Rattus norvegicus homeo box D1 (Hoxd1), mRNA	1830	AA	TT	AATAAATCCATTGGGTAGATAAGGATTAGAATCTAATTATACCTTGACATCAGTTACTCAAACTTGAAGTATAAATATATACAGTATGTATATTTT	96	132
NM_001037159.1	Rattus norvegicus protocadherin gamma subfamily B, 8 (Pcdhgb8), mRNA	4714	TT	GG		0	-
NM_001108760.1	Rattus norvegicus myelin protein zero-like 3 (Mpzl3), mRNA	1197	AA	CC	AAATGTCTACAAAGGGGACGCGTCCATCAGCATCAGCAACCCCACTCTAAAGGACAATGGGACGTTCAGCTGTGCTGTAAAGAACCCTCCAGACGTGTACCACAACATCCCCCTAACGGAGCTCACCGTCACCGAGAGGGGTTTTGGCACCATGCTGTCCTCTGTGGCCCTTCTCTCCATCCTGGTCTTTGTCCCCTCGGCAGTGGTGGTCATTCTGCTGCTGGTGCGAATGGGGAGGAAGGCAACAGGGGTGACTAAGAGGAGCAGGTCTAGCTATAAGAAGTCTTCCATTGAAGTTTCCGATGACACTGACCAGGAGGACAGCAACGACTGTATGTCCAGGCTTTGTGTCCGCTGTGCGGAGTGTCTGGATTCAGACTATGAAGAGGCATACTGATG…	519	555
NM_001013868.1	Rattus norvegicus sialophorin like 1 (Spnl1), mRNA	1521	AT	CC	ATCAGGAACAGGGAACAAGTGCTCTGGAGCACTGAAGTCCGATGGCTGTGGGCGGCGGCCCAACCTCTCCAATTTCTTCAGCAGATGGAAGTCTAGCCAGTGCTCCTTAGAAGAGCTGAAACCTGGGAAGGATCCAAACCTGAAGGGGGAGAAAGAGCCTCTGGTATGCAGTGAGGACAAAGCTATGGAAACCCCAACTTCTGACAAGCCACAAGTCAAAGATGGGGCTGCACCTCAATCCCAATGAGTAGCTGTATTCACCTAGTCTGCTCC	273	309
NM_001009699.1	Rattus norvegicus MAD2L1 binding protein (Mad2l1bp), mRNA	1262	GG	AC	GGTCACAAACTCACCGTGACACTGTCCTGTGGTAGACCTTCCGTCCCAGCCATGGCTTCCGAGGATTACATTTGGTTCCAGGCACCAGTGACAC	94	130
NM_001107586.1	Rattus norvegicus cleavage stimulation factor subunit 2, tau variant (Cstf2t), mRNA	3567	GG	TT	GGCAAAGCCAGGTAACTCCTCAAGATCAAGAAAAAGCAGCTTTGATCATGCAGGTTCTTCAGCTGACTGCAGATCAGATTGCCATGCTGCCTCCTGAGCAAAGGCAGAGCATTTTGATT	119	155
NM_001106732.1	Rattus norvegicus NK2 homeobox 8 (Nkx2-8), mRNA	1078				0	-
NM_001108096.1	Rattus norvegicus leucine-rich repeat-containing 10 (Lrrc10), mRNA	1398	CG	TG	CGCCTGCGCGAGCTCAGAACCATCTGGCTCTCAGGCAATCAGCTCGCTGACTTCCCCTCAGTGTTGCTTCACATGCCCTTCCTGGAGGTGATAGACGTGGATCGGAACAGTATCCGCTACTTCCCCAGCCTGGCCCACTTGACAAATCTGAAGCTGGTCATCTATGATCACAATCCTTGCAGAAATGCCCCGAAGGTGGGCAAAGGTGTTCGCCGCGTTGGGAGATGGGCAGAGGAGACCCCAGAACCTGACCGCAGAAAAACTAGGAGATCCGCACTGGCCAAGGAAGAGAACCAAGAGCCGCCTCCCCTTCTTCCTCCCAGCTCTTGAGCAGCTGCTGTTGAAGAGCAATTCAGAGGACCCATCTGTTCCGAAGGCATCTCTTTGGAGCAGAAGGCA…	683	719
NM_001012027.1	Rattus norvegicus serpin family C member 1 (Serpinc1), mRNA	1561	TC	TC	TCACTGAACCCCAGTAGGGTGACCTTCAAGGCCAACAGGCCCTTCCTGGTTCTTATAAGGGAAGTCGCACTGAACACTATTATATTCATGGGGAGAGTGTCTAATCCTTGTGTGAACTAAAATATTC	127	163
NM_001106436.1	Rattus norvegicus AADACL2 family member 3 (Aadacl2fm3), mRNA	1256				0	-
NM_001107291.2	Rattus norvegicus inter-alpha trypsin inhibitor, heavy chain 1 (Itih1), mRNA	2906	AC	GG	ACACAGGGACTATTGGGGCAATTCTTCTCCCCACTGGATTTTGAAGTATTTGACCTCCGCCCAGGCTCTGACCCTACAAAGACAGATGCCACAATGGTGG	100	136
NM_001107579.1	Rattus norvegicus PNMA family member 5 (Pnma5), mRNA	1925	CC	AA	CCCAGGAGAAGAAAGCTTTGAGACCTGGTTAGAGGAGGTCACTGAGCTGATGCACTTATGGCAGGTGTCTGAGAGTGAGAAGAAGCAGCGCCTTGTGGAGAGTCTGCGTGGCTCTGCCCTGTCAATCATGCAGGCACTGTGGGCTAGCAATGACTCCCTAACTGTGGAGCAGTGTTTGAAAGCCCTAAAGCACATCTTTGGGAATAAAGAGGACTGTAAGGTCTTCCAGTTCAGGTTCCTTCAATCTTCTCAGAAACCTGCAGAGAAGATATCTGATTACTTGCTACGCTTAGAGCCCCTGCTGCAAAAAGCAGTACAGCAGAGCCCATTGTCAACACACAGTGCAGATTCAATTCGTCTCAAGCATATCTTATCTAGGGTCTCCATGACCACTGGCCT…	454	490
NM_172073.1	Rattus norvegicus trophoblast specific protein alpha (Tpbpa), mRNA	703				0	-
NM_138889.2	Rattus norvegicus cadherin 13 (Cdh13), mRNA	3403	TC	TT	TCAAGATCAGCCCACTGAGCTGTCACTCACTTGTATAGCAAGGGCCTGCTCAGTCTAAACACTGAATGAATGCTGACCGACCAGCCAGGCAGGTCCAGGGGGTGGGGGTGGGGGAAGGGCAAGGGAAAGAAGTCTTCTCTGCTGGGTAGGACTGCCACCACACCCCACTACCACCAAATGCCATGGCTTGATGTTCCGACCCCCAAAGTGGGGAGCAAGGCATCTTGCCATCAGAGGCTAAGGGCTGAACTATTCTCCCATGGGCAAGAGTCTGCCACTGTACCACCCCAGACCCACAGTCCTACAGTCCTTGTGGTGACACAGATCATGGTGGAGACCCTCTCCCTCCTTGGTATATGTACAAGTACAAAAGTCACCATGGCGTACCTATGAAGAGAC…	508	544
NM_001108198.1	Rattus norvegicus guanylate cyclase activator 1B (Guca1b), mRNA	1677	TA	CC	TACCATTCCCAGCCATATGCCCACGTGTCTCCTCAAGGATGGAGACTTCTCTTCATCTCTGAGGGGAACCTGACGTTTGAGTTTCAGGCCAGAGTTTGCCTCCCAACAGTCGTTGGACTCCCTAACCTCCTTCGGGTCCACTAGACAGTTTCCAGGTTATCATGTAAATGTCC	173	209
NM_001127546.1	Rattus norvegicus KDEL endoplasmic reticulum protein retention receptor 3 (Kdelr3), mRNA	1308	CC	CC	CCTTTCCTTTCTGGTGAACTACAGTTATGCACCAATGGAGATTCTCTGGACCTTCTCCATTTATCTGGAGTCAGTGGCTATCCTGCCACAGCTCTTCATGATCAGCAAGACTGGAGAGGCTGAGACCATCACCACTCACTACCTGTTCTTTCTGGGGCTCTATCGGCTACTCTATCTGGCCAACTGGATCAGGCGGTACCAGACAGAGAACTTCTATGACCAGATCTCAGTGGTGTCTGGAGTTGTACAAACCATCTTTTACTGTGACTTCTTCTACTTGTATGTGACCAAAGTCC	296	332
NM_001024753.1	Rattus norvegicus interferon-induced protein with tetratricopeptide repeats 2 (Ifit2), mRNA	3433	GA	AA	GATACAAAAATGTTTCTCTACTGGCATTAGCTTGTCTTTATGTATCCATGAACATCTTATTTAGCAA	67	103
NM_001012093.1	Rattus norvegicus zinc finger protein 64 (Zfp64), mRNA	2419	TC	TT	TCCCTCACAATAAATTGTATTTTATACAGTTTATGTAATTTTT	43	79
NM_001105747.1	Rattus norvegicus interleukin 9 (Il9), mRNA	563				0	-
NM_001105934.1	Rattus norvegicus unc-119 lipid binding chaperone B (Unc119b), mRNA	3659	GA	CC	GATGGGCCATAGACTCAGATTCTGAAAACATCCACATTCCGTGTCCAGAGCATCATAGCCAGGGAGTCTGGAAGAGGTGGGCTCACCCTTGTTTCATAAAGGATCATGTGGTGATGTCCCTCGAGTTGTGAAAGTCTATTTTCCCTGTAAATCTATTTTTCACAGAATTTTAGAAACATCTCTGTCC	187	223
NM_001106325.1	Rattus norvegicus CD248 molecule (Cd248), mRNA	2565	TC	CA	TCACCATCCTTTGCTCCCAGATGTTCCAGGTATCAGAACCCAGGCTCCCCAGGTTTCTGTCTCAGCTCTCCAGCCCTCTCTGCCTACCAACTCCAGGTCTTCTGTCCATGAACCCCCTGTGCCTACTGCCAACCAGCCCCCAGCCTTCCCTTCTCCCCTGCCCCCTCAGAGCCCCA	176	212
NM_001106497.1	Rattus norvegicus signal recognition particle 14 (Srp14), mRNA	839	TC	TG	TCATCGGGCAGCGTGTTCATCACCCTGAAGAAGTATGATGGTCGCACTAAACCAATCCCACGGAAGAGTTCCGTGGAGGGCCTCGAGCCCGCAGAAAACAAGTGTCTG	108	144
NM_001134509.1	Rattus norvegicus BLOC-1 related complex subunit 7 (Borcs7), mRNA	2144	AT	GT	ATTCGCAAGCCCGATTTGGTCAGTCGGTGAAGGGGCTTCTCACGGAAAAGGTGAACACCTGCGGCACCGACGTAATCGCGCTCACCAAGCAGGTGCTGAAAGGCTCGCGAAGCTCTGAGCTGCTGGGGCAGGCAGCTCGAAACATGGTGCTACAGGAAGATGCCATCTTGCACTCAGAAGATAGT	185	221
NM_001105870.1	Rattus norvegicus receptor (chemosensory) transporter protein 1 (Rtp1), mRNA	825				0	-
NM_001108438.2	Rattus norvegicus docking protein 4 (Dok4), mRNA	1554	AG	GC	AGGTGCTGGCTGGTGTTCCGAAAATCTTCCAGTAAGGGGCCCCAGCGGCTGGAGAAGTATCCTGATGAGAAGTCAGTGTGCCTCCGAGGCTGCCCCAAGGTGACTGAGATCAGCAACGTCAAGTGTGTCACGAGGCTCCCCAAGGAGACCAAGAGACAGGCGGTGGCCATCATATTCACGGATGACTCTGCTCGCACCTTCACTTGTGACTCAGAGCTGGAGGCAGAGGAGTGGTACAAGACACTGTCAGTAGAGTGTCTGGGATCACGGCTCAATGACATCAGTCTGGGAGAGCCAGACCTCCTGGCCCCAGGAGTACAGTGTGAGCAGACAGATCGCTTCAATGTCTTCCTGTTACCCTGCCCTAACCTGGACGTGTATGGCGAGTGCAAACTGCAG…	847	883
NM_001108908.1	Rattus norvegicus nanos C2HC-type zinc finger 2 (Nanos2), mRNA	1461	AA	TC	AAGTCTGGCTACTGCATGCAACTTTTGCAAGCACAACGGAGAGTCTCGTCACGTCTACACCTCACACCAGCTGAAGACGCCTGAAGGGGTGGTAGTGTGTCCCATCCTGAGGCATTACGTATGTCCTCTCTGTGGGGCCACTGGCGACCAGGCGCATACACTCAAGTATTGCCCACTCAACAGCAGCCAGCAGTCTCTCTACCGTCGCAGTGGACGAAACTCAGCTGGTCGCAGAGTCAAGCGATAAGTGAGGCCCTGTGAGGTACCTATCACCCATGTCCCAGACCCTCCTTCTGATCCTAGCACCCTCTGCTATGCTCACCCAGCCCTCTGGAGGTCCCTGGATC	347	383
NM_001034144.1	Rattus norvegicus NK3 homeobox 1 (Nkx3-1), mRNA	1800	GC	AA	GCTGCTTTCTCTCACACTCAGGTGATTGAGTTGGAGAGGAAGTTCAGCCATCAGAAGTACCTGTCCGCCCCTGAAAGGGCTCACCTGGCCAAGAACCTCAAACTCACCGAAACCCAAGTAAAAATATGGTTCCAGAACAGACGCTACAAGACTAAGCGAAGGCAGCTGTCAGAAGACCTGGGAGTCTTGGAGAAGAACTCCACATTGTCTTTGCCAACCCTGAAAGATGACAGCCTATCCAGGGCCTCCTTGGTCTCCGTGTATGCTAGCTACCCCTACTACCCCTACCTATACTGTCTGGGCAGCTGGCATCCAACTTTCTGGTAACAACAGTTCAGATGACAACTGCATAGATCAGAAACTGCCTTCCCTGGGGGTCCCTGGGAAAAAGCCAGAGTG…	749	785
NM_001106527.2	Rattus norvegicus testis specific protein, Y-linked 26 (Tspy26), mRNA	2100	GA	CC	GACACCATGCGAAGCTTCTTCAGCTGGTTTTCTCAGCATAGCCTCCTAGAAGCTGACAGAGTGGCCCAGATCC	73	109
NM_001037351.2	Rattus norvegicus troponin C2, fast skeletal type (Tnnc2), mRNA	736				0	-
NM_001108972.2	Rattus norvegicus insulin-like growth factor binding protein-like 1 (Igfbpl1), mRNA	1355	GT	TT	GTGACCTCCTGTGATGAACATGGCTTCCAGAGACACTGGTCACAGAACAGCGGCTGTCAAGGAGTGGATCGTTTTACGCTGTGAAAATCTAGGGAAATTGCCTGTAGATGGCTGCTTTTTGTATGTTTGTTT	132	168
NM_144751.1	Rattus norvegicus resection-induced TPI (rs11) (LOC246267), mRNA	808				0	-
NM_001012128.2	Rattus norvegicus zinc finger protein 105 (Zfp105), mRNA	2025	AG	TT	AGAGAAGCCCTATGAATGTGCAAAGTGTGGTGCAGCTTTTATTTCTAACTCACACCTCATGCGACATCACAGAACTCATCTTGTCCAATAGCAAGGAAGAGGGTGAAACCTTGCTCTTGGTCATAACCTACTGCTGCTAATAGCAGGCACCTCTGTTCTTTATTCTTCCTTGGCCAAAATGAGGACTGTACCTT	194	230
NM_001106200.1	Rattus norvegicus tectorin beta (Tectb), mRNA	2749				0	-
NM_001164157.1	Rattus norvegicus NUS1 dehydrodolichyl diphosphate synthase subunit (Nus1), mRNA	3662	AT	GA	ATGTATGTTGATTAGTTACTCCCTTCTGTGTGACGGTCCTATGCTTAGAGTCAGTGAGGTCCTTGTAACGTTTGTTATGCTTGTAGATTTTGGCAACTTGTAAATAATGTGTATAGCGAGTTTTTATGA	129	165
NM_001106544.1	Rattus norvegicus dolichyl-phosphate mannosyltransferase subunit 1, catalytic (Dpm1), mRNA	2297	GT	AT	GTCACTGATTTTTATCAATGTTCTCTTAGCACATGAACCAAAGGTAAGATACAT	54	90
NM_001173974.1	Rattus norvegicus R3H domain containing 4 (R3hdm4), mRNA	1803	GG	TT	GGCATTTCTCTGTGTTTTCTCTGTTTAGCTTTCTTTGGCCCAGTCGTGCTCAGGCAAGGAGTAGCAGATTGTTTTCTTCTTCCCTCTCCTAATCAGTT	98	134
NM_001004215.1	Rattus norvegicus peptidylprolyl isomerase C (Ppic), mRNA	1380	AC	AC	ACGGTAGAAAACTTCGTGACTCTGGCAACAGGAGAGAAAGGCTACGGGTACAAGGGAAGCATATTCCACCGTGTCATCAAGGACTTCATGATTCAAGGAGGGGACTTCACGGCTAGAGACGGCACTGGAGGTATGAGCATTTATGGTGAGACATTTCCTGATGAGAACTTCAAACTGAAACACTATGGCATTGGGTGGGTCAGCATGGCCAATGCTGGACCAGACACCAATGGTTCCCAATTCTTCATCACCTTGACCAAGCCCGCCTGGCTGGATGGCAAACATGTGGTATTTGGAAAAGTTCTGGATGGGATGACTGTGGTACATTCCATAGAACTTCAAGCAACGGATGACCATGACCGCCCACTTACCGACTGCACCATTGTCAACAGCGGCAAG…	529	565
NM_001108187.1	Rattus norvegicus inka box actin regulator 1 (Inka1), mRNA	1062				0	-
NM_001108887.1	Rattus norvegicus SFT2 domain containing 3 (Sft2d3), mRNA	2201	AT	TG	ATCAAAAAGCCAGTTATCCAGTATGACTGAGTGGCAAATTTTGCAAAGGTCTCTGTAAAACTAGGCTAAGAAATCCTGGGATACAGGGAATTTTTACATTTGTAGTTATCATAGTTGTTATATAAGTTTTGCCAGGTTTTTGATTCCTAACGATGCTGCTTG	162	198
NM_001012019.1	Rattus norvegicus testis-specific serine kinase 2 (Tssk2), mRNA	1379	CT	AA	CTGCTGGTAGCACCTGAGAATGAAGACAGGATGGAGGAGAGGCTGGCGGAGACTTCCAGAGCTAAAGACCATCACATCTCTGGAGCTGAGGTGGGGAAAGCAAGTACCTAGTGGCGGAGAGGGCCCTGGGGGATCATGGTGTGCAGTCTGCACCCACATAAGCTAAGTAGGAGGTAGGAGCTGAAGAAGGCACAGGTGCAAGGAACAAGTAAAATCCGTCAA	222	258
NM_001014124.1	Rattus norvegicus DnaJ heat shock protein family (Hsp40) member C28 (Dnajc28), mRNA	1436	TC	CA	TCTGTGAAGATCACCA	16	52
NM_001106365.1	Rattus norvegicus TATA-box binding protein associated factor 5 (Taf5), mRNA	3240	AT	CT	ATAGGAACTACCTACTCTCCTCTTCAGAGGATGGAACCGTTAGACTCTGGAGCCTGCAGACTTTCACTTGCTTAGTTGGATATAAAGGGCACAACTACCCAGTGTGGGACACACAGTTTTCTCCATATGGATATTATTTCGTGTCAGGAGGCCATGACCGCGTAGCTCGGCTTTGGGCTACAGATCACTATCAGCCT	197	233
NM_001108863.1	Rattus norvegicus F-box protein 48 (Fbxo48), mRNA	1016	TA	TT	TATGGAATTGAATTCCGAGGATGCTGAAGGGGGGAGAAAAGAGAATCAAAGTAACTTTGTTGACCTGCTGCCCCTGGAAGTCACTT	86	122
NM_001025713.1	Rattus norvegicus MAGE family member C2 (Magec2), mRNA	1944				0	-
NM_001107580.1	Rattus norvegicus three prime repair exonuclease 2 (Trex2), mRNA	985				0	-
NM_001107925.1	Rattus norvegicus interferon kappa (Ifnk), mRNA	886				0	-
NM_020089.2	Rattus norvegicus sterile alpha motif domain containing 13 (Samd13), mRNA	1981	AC	AG	ACCAAAGAGGAGCTCATCAGAGGTGACGGCAGAGACGAAACCAATTGGGAAGAAGAAATATGCTCTCGGAGGCCACGCCGCACCTTCCAGACGGTCATCGAAGATGAAGACCTTTTTTCAGGAGATTATTTATTCACTGGTCCCATGACGCATTCCAGAAGAGGTTCTTCCAACTTCTTTACAGTCACCCCCATTATAGACACAGGGTTTTCTACTTTTGTGTCCCAAGAATCCAAATCGAGTCCCGATGACTCTGAAGCCTTTGTGCCGTATATAAGCCATGGAATGGGAAAGTTCAGACTGGTCACCACTTGTAGCCAGATAATGAATGGTAAGAGAGTTGTCACAAAGAGAGTTGTAGAGAACATTCAAGGACCAAAGAAAATAGAGAACGAACGG…	488	524
NM_001134788.1	Rattus norvegicus V-set pre-B cell surrogate light chain 1B (Vpreb1b), mRNA	624	GC	AA	GCTTCGCAGAGCCAGGAAGGTGGAGCCAGCCGCTTTTCCTTGTATTGCAGTGTTGCTATGCGCCCCATCGGAGGCTGGATTGTAGAA	87	123
NM_001108116.1	Rattus norvegicus homeo box C5 (Hoxc5), mRNA	2734	GC	TA	GCTAAAGGCTGCTCTACACTAGGACAGAAAGAGAACAGAGTAACTCTGAGGAGGGGCAGGGAGATTTCTTTTTATGATTA	80	116
NM_130408.2	Rattus norvegicus cytochrome P450, family 26, subfamily a, polypeptide 1 (Cyp26a1), mRNA	1754	GA	GT	GAGGGTTTCGGGTGGCTCTGAAGACTTTTGAGCTGAACGGTTACCAGATTCCCAAGGGGTGGAATGTTATTTACAGTATCTGTGACACCCATGACGTGGCAGACAGCTTCACTAACAAGGAGGAGT	126	162
NM_001029920.1	Rattus norvegicus V-set and transmembrane domain containing 4 (Vstm4), mRNA	2163	TG	TT	TGGCCCCTTACCATACTCTATAAACATTGTTTGGCTTGTAATTTTACAATGTACATATGATAAATTATCTATT	73	109
NM_001033685.2	Rattus norvegicus Sin3A associated protein 18 (Sap18), mRNA	770	AC	CA	ACTTTGCCA	9	45
NM_198733.1	Rattus norvegicus cytochrome P450, family 2, subfamily b, polypeptide 21 (Cyp2b21), mRNA	1885				0	-
NM_001108859.1	Rattus norvegicus interferon regulatory factor 6 (Irf6), mRNA	4044	GA	CC	GAAGGCAGATTTGAATCTGGTCTCCTCTCCACAATGAAGTCCTTGGTTGTATGTTCCTGTAGCACC	66	102
NM_001024789.1	Rattus norvegicus nucleosome assembly protein 1-like 2 (Nap1l2), mRNA	2450	AG	AG	AGATGGCGGGCAACAGGGTGAAGAAACCGTGGCTGCTGGAGTCGAGGAGGAGGGAAAAGGTGAAGAAGCTGCTGCAGGGTCTGGGGAAGATGCAGGCAAACGCGGAGGTGCTGCTGAGGACTCAGACTCAGACCGTCCAAAAGGACTTATCGGTTATCTTTTAGATACCGACTTTGTTGAAAGTCTCCCAGTGAAAG	197	233
NM_001134991.2	Rattus norvegicus zinc finger and BTB domain containing 12 (Zbtb12), mRNA	2398	AG	GC	AGACAGGGTTGACATGGCTGAGGGAATATGGGGTCCCAAAGAAAGATTTCTTTTATTGAAGAGGTGCATAAACGATGAGGAGGAAGGGGGGAAAAACAAGCAATGATGAAAGTTTTGGAGTACAGCACTTCCCTGGGTAAAGC	143	179
NM_153726.1	Rattus norvegicus Ly-49 stimulatory receptor 3 (Ly49s3), mRNA	1420	AC	TG	ACTG	4	40
NM_001108804.1	Rattus norvegicus F-box protein 36 (Fbxo36), mRNA	901	TT	TC	TTTGAGAAGCTGTGCAAGAGTGACTCGCTGTGGGAGCAGATAGTCCAGTCCACCTATGACACCATCACCCCTGACATGCGGGCCCTGGCGAATGACGTGGGCTGGAGACAGATGTTCTTCACCAACAAGATCCAGCTCCAGAGGCAGATCCGCAAGAAGAAGCAAAGACAGGGAAGCGAGACTACGAAGCCTACTTAGGGGACGGCTGTTCCCACAACTGAGGCCACAGTGGTGCATCTCTTCAGGTCCAATCTCACTCTCTC	263	299
NM_053941.1	Rattus norvegicus protocadherin alpha 3 (Pcdha3), mRNA	5226	AA	TT	AATATCAGCTCATAGAAAGTAATAAAATTTGCTGTTACCATAAATAAGACATT	53	89
NM_001106932.1	Rattus norvegicus fem-1 homolog C (Fem1c), mRNA	6771	GT	GG	G	1	37
NM_001107685.1	Rattus norvegicus similar to human chromosome 4 open reading frame 46 (C2h4orf46), mRNA	1754	TG	TT	TGTGTCTCTTGAGGCAGGCGATGAAGATTTCAGGAGCATGGTCCAGCCCCACAGACTTCCCTTATCCCAAATCCCACAGCCACCCCCACAGCACTCACTATCTGTGAATAAGACTCGATGAGTATAATTGAAGGAAAAATACTCTTTTTTTTTTTTTTTATGGGAATTTGACATTTTTTTTGCCTTGAAGCAGTCTCCCTGTGAAGGCTTCTGTCTTAGTCTCTTGAGGGCCAGGACTTCTGGTGTGCAACACCGTGCCCAGTAGAAAGTTTTGAATTTTGATGATGATT	290	326
NM_001106208.2	Rattus norvegicus poly(A) binding protein, cytoplasmic 6 (Pabpc6), mRNA	3100	AT	TT	ATATAAAACACACCCCACACTATCTGTAATTCACATAATTGATATACCAAAGAACCCCCCTTCAATTTAGAAGCTTGTGTCTGTGGCATGAACTACAGAAAGTGAATT	108	144
NM_001008327.1	Rattus norvegicus cytosolic iron-sulfur assembly component 2A (Ciao2a), mRNA	1165	AC	GT	ACTGACGCCTTCCTAAGAGCCAGTGGCCTGGAAGCATTTGATCTGCTTGT	50	86
NM_001106660.1	Rattus norvegicus ATPase H+ transporting V1 subunit G1 (Atp6v1g1), mRNA	1074	CC	CA	CCAGAAATCCATGAAAACTACCGCATAAATGGATAGGAGGCAGACGCGCCTGCTCTGTGGGTTGGCATGGGATCTGTCCCCGTGGAATAGGAAACCTGCAGAGCTCGAATTGTATTCTGGAAGACA	126	162
NM_001106783.1	Rattus norvegicus myogenic factor 5 (Myf5), mRNA	2055	GT	AT	GTCGGAAGGGAAGACAAGCAGCACACAATATGTGCTTTTCCGTTGTAAATACTGTCCTGCCACTTTATAAGAAAATGTAT	80	116
NM_001106442.1	Rattus norvegicus signal sequence receptor subunit 2 (Ssr2), mRNA	1039				0	-
NM_001009385.1	Rattus norvegicus apolipoprotein N (Apon), mRNA	1272	GT	GA	GTAACAATGGAACTCAGAGATTCACCTGCCTTTGCCTCCAAGTGCTGAGA	50	86
NM_001108578.1	Rattus norvegicus allograft inflammatory factor 1-like (Aif1l), mRNA	3070	AG	TC	AGTGGGAGTTTTAGCCTTGATCCTAACTGTTCTGGGCACTCAGGACAAGATACAGTCACTCATCTTTACCAAGCACCTGCTCTATGCCACAAGTCCAGAACCCAGCAGTGAAATGGACTGAGGCATGAAATTTGTGTCTACTGGGAAGCCACACCCAGCTAATGACAGTGTGATGTTAGGAAATGGGGGGAGGAGCAAGAGGTGAGTGCCGCCGAGTAGTCCCAGGAATTCCAGCTGGGCTCATGACTTGGCAAGTGTCAGAAGAGCTTCTGTGAAACTC	280	316
NM_001106085.1	Rattus norvegicus dynactin subunit 6 (Dctn6), mRNA	968	CC	CA	CCCAATCATTATCGGCGAAGGAAACCTAATAGAGGAGCAGGCCCTCATCATAAACGCCCATCCAGATAACATCATCCCAGACACTGAAGACCCAGAACCCAAACCCATGATCATCGGCACCAACAACGTGTTTGAAGTGGGCTGCCATTCCCAAGCCATGAAAATGGGAGACAATAATGTCATTGAGTCAAAAGCGTACGTAGGCAGGAATGTCATCCTGACCAGCGGTTGCATCATTGGCGCTTGCTGCAGCCTGAACACCTTTGAAGCCATCCCTGAGAACACAGTGATCTATGGCGCCGACTGCCTGCGGCGGGTGCAGACGGAGCGGCCACAGCCCCAGACACTACAGCTGGATTTCTTGATGAAGATCTTGCCCAATTACCACCACCTGAAGAA…	741	777
NM_001106198.1	Rattus norvegicus piggyBac transposable element derived 5 (Pgbd5), mRNA	2006				0	-
NM_001107577.1	Rattus norvegicus leucine rich repeat containing 10B (Lrrc10b), mRNA	1229				0	-
NM_001108136.1	Rattus norvegicus TLC domain containing 5 (Tlcd5), mRNA	947				0	-
NM_001106218.1	Rattus norvegicus leukocyte receptor cluster member 1 (Leng1), mRNA	1846	GG	CC	GGAAGAAGGTGGTCAGTGAGTGGACGAAGAGGGGGGCTGAGATCTGGGCCAGGCAGATGAACAAGAGGCAGTTGTCAGGGACATGGAGGTACCAAGCCAACTGTCCTACATGCTTGCACTGTCACACTCCACCCTCAGTGACC	143	179
NM_001106059.1	Rattus norvegicus THO complex subunit 3 (Thoc3), mRNA	2115				0	-
NM_001106206.1	Rattus norvegicus F-box protein 5 (Fbxo5), mRNA	1907	CA	CT	CACAATGAGTTCCTGGAGGTGGCAAAGACATTGAAAAACAACGAAAGCCTCAAAGCCTGTGTTCGCTGTAATTTCCCTGCAAAATATGACCATTATTTAGAGCGAGCAGTCTGCAAACGGGAAAGTTGTAAATTCGAATATTGTACAAAGTGTCTGTGTGCTTACCATAACAACAAAGACTGTTTGAATAGCAAGAACCTAAAAGCCAGCTGCAAAATGGGTCCTTTGCCTGGAACTAAAAAGAGTAAAAAGAACTTACAAAGATTGTGACCTTTTAGTCGATCAACTGTACATCGTAAGGGCTACT	307	343
NM_001105776.1	Rattus norvegicus forkhead box I1 (Foxi1), mRNA	2319	TA	CA	TACCCACCAATGCTCTGGGCTATGGAGGCCCTGTCTTCAACCAGTTCAGTCCACATTTCTACAATAGCATCAACACCAACAGTATCCTCTTCCCCAGGGAAGGCACTGAAGTCTAGAGATAGAACAACTTCTGGTCTACAGAGCTCTCTGGGGTTGGTGGGGGGAGGGAGCAATGGTGGTCCTTCAGACCAGATCCCTCTCCCACCCCAAGATCAGAGACATTTGAACTTCCCAGATAGCACCACAGGAAGCTTGGAAGAATCTGTCTTCTTTCTAAGCACCGTTCTAGCCTTCCTGGTTCTCTACACAGATTTGATCGTGAATCTACACGGATTTGATAACTAAAGTGGGCGTACCAGGACCAGCTTGCCA	372	408
NM_001108000.1	Rattus norvegicus C1q and TNF related 12 (C1qtnf12), mRNA	1313	GA	TT	GATGCTTTTGGGTACGTAGAGGAACTGAAGAGATGATTGAGGATTGCAGAGCCAACACCTTGCTTCTTAGAGGAGCTGAAAAGGACTACTCCCCCTT	97	133
NM_001039028.2	Rattus norvegicus actin related protein 1B (Actr1b), mRNA	3193	TG	TG	TGTGTGGCTCTGATTCTTGTGGCTCTGTGCTCTCATTTGCTCAGCAGTCCCTGGGCGCGTTGAGAGAAAGGACACTGGCAGAAAGCTCTGGAGCTTGAGGCAACAGAACAAGGGAGAGCAGCCTCACCCTCCTGCGAGGCTTGCTAGGGCTGCTGTGTGTGCTTCATGTGATGTGTGTTGGCAGCAGAGGTGTGCAGGTCCCAGCTTAGGGCAGGACCAGAAGGAAGGGCAGCCTAAGAATGGACCAGGTTCCACAGGAAGGAGGACAGTCTGCAGGAGGCCTGCAGGCAGCAAGAGCTCAGCAAGTAGAGAAGTTTGCTTGTTTGGTACTTACTGCACAACACATGTTTGAGGCTGATGGAGAACAAGGTACAATTTTGCCCCCCAAAAGCGTTCATC…	959	995
NM_001014259.1	Rattus norvegicus RNA polymerase III subunit K (Polr3k), mRNA	995	AC	CT	ACTTGCCTAGCTGTGAGCATGATTTCTGTGTGCTGAAGGTCTTTACTGTATGGTAGGAAGCCGATCTTCTGTGGTGAAGGACCTGGGTGAATAGAGCTCATCTGCAAGTTAGCGGCTCTCAGGTCCTTGGGAGCTCCACGCAAGGATGTCACTTGGCTCAGGTCCTGGTCCTACATTCGAACTTGGAACTTGGGTTTTAGCCAGTCTTTTTTGTTTTTTAGTTTTTCAAGACAGGTTTTCTCTGTGTAGTCCTTGCGCTGCCCTTGCTGTGTAGACCAAGTTGACCTTGAACTCATTATCCACCTCCCTCTGCCTCTGGAGTGCTGGGTGCCACCACCGCCCATGATGATCTTGACCCTCCTACATATGAACCATTTTCATTCTGTGCAGTGCAGGGAT…	509	545
NM_001113777.1	Rattus norvegicus armadillo repeat containing 12 (Armc12), mRNA	1241	GC	CT	GCAGTCTGCTATTCGAGGTGCTGGTGTTTGCCGAGCGCTTGAGTGAGGGTCGGAACGCCAACCACTACCGAGCGGTAAAATGGCATTACAACGAGCAGTCCCTTCACGAAGCCCTCTTTGGGGATGAGTCCAGACTGGCAGACCGACTGCTTTCCCTGGTCATCCACCCTGAGGAGGAAGTTCAGATCCAGGCCTGCAAAGTCATAGTGAGCTTGCAGTGTCCTCAGGACCTGGGATGCCGACCCTCTGTCTGCCGACCCAGCCATTCCTACT	273	309
NM_001108122.1	Rattus norvegicus JRK-like (Jrkl), mRNA	2897	TG	AC	TGAAGAAAGGATCACCGTTATGTGTTGCACCAATGCAACAGGCTTGCACAAAC	53	89
NM_032074.1	Rattus norvegicus insulin receptor substrate 3 (Irs3), mRNA	1969	GG	TC	GGCCTCTTTACTACGAGTTCAAGGCCAGGGAGCCTGAACATGGGCATTCTAGTGCCCAGTGTAGCATTAGGGACAGATGGAGACCCATGGTGGCTCAGCCCCGCTCTTCCCAAGGGTCAGAGCTCTCTGGGGACTACATGTACATCCCTGACTATCCCAGTGCTAGGCTGGGGTCTCTGGACAGCTGCCTCAACTATGTGGACCTGGACCTAGTCCCTCCCCTGGAGGTTCCTGGAGCGGCCCCAGGGAATAGTCCACATAGCTATGCCAGCATCAAGTTCTAGAACTTTCAGAAGATAGGGGAGGAGAACCAAGCATTGGTTAGGGAAGAGAGGAAAAGAAGAGAAAACCTTAGCACTGTTCAGCTCAGCTTCTGCACATAGGAGCCAGGGACTCTGA…	501	537
NM_001109023.1	Rattus norvegicus pinin, desmosome associated protein (Pnn), mRNA	2821	AA	CG	AAGCGAAGGGACACTTCAGGACTAGAAAGAAGTCACAAGTCTTCAAAAGGTGGTAGTAGTAGAGATACGAAAGGATCAAAGGATAAGAATTCCCGATCTGACAGAAAAAGGTCTATATCAGAGAGTAGTCGATCAGGCAAAAGATCTTCAAGAAGTGAAAGAGACCGAAAATCAGACAGGAAAGACAAAAGGCG	194	230
NM_001025737.1	Rattus norvegicus sphingomyelin phosphodiesterase, acid-like 3B (Smpdl3b), mRNA	1923	GG	CT	GGTCACCCCGTGGAAGACCACATTACCTGGAGTGGTCGATGGGGCCAACAATCCAGCGATCCGCATTTTTGAGTATGACCGAGCCACTCTCAACTTGAAGGACATGGTGACTTACTACTTGAACCTGAGGCAGGCGGATACACAAGAGACCCCGCAGTGGGAGCAGGAATACCGCCTGACAGAGGCCTACGAGGTGCAGGACGCCAGCACCAGTTCTATGTATACAGCACTGACCCGCATCGCCAGTGAGCAGCACATCCTGCAACGTTATTACGTCTACAACTCGGTCAGCTACAGCCATCAGCCCTGTGAGGACGTCTGCCGAAGGGAGCATGTGTGCGCCATACAGCACGTGGAGTTCGACACTTACGCCACCTGCTTGCATGGTCTTGGTGCCAA…	701	737
NM_001106611.1	Rattus norvegicus LSM3 homolog, U6 small nuclear RNA and mRNA degradation associated (Lsm3), mRNA	709	GG	CT	GGAGATGGTGTTGTTCTAGTCGCCCCTCCATTGAGAGTTGGCTGAGACAAAAATGGAGCCTGCGTAGGGAAGTGGAGACTTTGCCTCTTGAGATGTACAGGACACTCCCAGAGAGAGAAGCTCACACGCATCTGATAGTCAGAAATGACCCGAGGATCCCTCTACCCTCAAAGAAGTTCATTTGCAAGTAACTCACAAGCTCTCCAGCTAAATGGCCTGCCCCTTTCTCCAGCCCTCCAGTCAGTGTGACCGCCTTGCTCTTCAGGAGTTGGTTTGCCCATTGTTCTTGCAGTTACTTTCAGGATGTTTTTCT	313	349
NM_199505.4	Rattus norvegicus protocadherin alpha 5 (Pcdha5), mRNA	5385	AA	TT	AATATCAGCTCATAGAAAGTAATAAAATTTGCTGTTACCATAAATAAGACATT	53	89
NM_001106971.1	Rattus norvegicus dual specificity phosphatase 21 (Dusp21), mRNA	857	TG	AT	TGAGCGATGCTCCTAATTCTTACCTTTATGACTTTTTCGACCCCATAGCTGATCATATCCATGGCGTGGAAATGAGGAATGGCCGCACACTATTGCACTGTGCCGCAGGAGTGAGCCGCTCAGCAGCCCTCTGCCTTGCCTATCTCATGAAATACCACACCATGACCCTGCTGGATGCGCACACATGGACCAAGTCCTGCCGCCCCATCATCCGTCCCAACAATGGCTTTTGGGAACAACTGATTCATTATGAGTTCAAGCTGTTCAGTAGGAATACTGTTCACATGATCTACTCTCCTATGGGTCTGATTCCTAACATCTATGAAAAGGATGCCTAT	338	374
NM_001108001.1	Rattus norvegicus PPARGC1 and ESRR induced regulator, muscle 1 (Perm1), mRNA	3861				0	-
NM_001108845.1	Rattus norvegicus V-set pre-B cell surrogate light chain 1A (Vpreb1a), mRNA	791	GC	AA	GCTTCGCAGAGCCAGGAAGGTGGAGCCAGCCGCTTTTCCTTGTATTGCAGTGTTGCTATGCGCCCCATCGGAGGCTGGATTGTAGAA	87	123
NM_001039516.2	Rattus norvegicus potassium two pore domain channel subfamily K member 5 (Kcnk5), mRNA	3489	AG	TT	AGCCATAGTAACCACACTGTATGCATGTACTGGTGGTGAAGACAGGTGTAATTTATT	57	93
NM_199486.2	Rattus norvegicus protocadherin alpha 11 (Pcdha11), mRNA	5241	AA	TT	AATATCAGCTCATAGAAAGTAATAAAATTTGCTGTTACCATAAATAAGACATT	53	89
NM_001173373.1	Rattus norvegicus sosondowah ankyrin repeat domain family member D (Sowahd), mRNA	1657	AT	GG	ATGGCTGAAATGCACCTCAAGTGTATCGCGCATCAAGTCCGTGGGAATAAACTACAAAGAGGCATCTCAGTCAGTCAAAGAGAAGAAGGCATGGGGCAATCAGGGAGGACAAGGCAATGGCCTTCTGCGCCAGCTGTTCCCCTTCACCCAGAATCGTTGAAGGTGACATGGACCAGAGAGCTTATTCGTAAGCTGTTCCTGACCCCACCCAAGCAGATGCTCCTCTGATTCAGCTTGGGCCTGCAATGGG	250	286
NM_001024232.1	Rattus norvegicus cytochrome P450, family 3, subfamily a, polypeptide 62 (Cyp3a62), mRNA	1796	CT	TG	CTATGAGACCACTAGCAGTGCTCTTTCCTTTGCTTTGTATTTGCTGGCCACACACCCTGATCTCCAGAAGAAACTGCAGGATGAAATTGATGCAGCTCTGCCCAATAAGGCACCTGTGACCTATGATGTCCTGGTAGAGATGGAGTACTTGGACATGGTG	160	196
NM_001107574.1	Rattus norvegicus zinc finger, HIT-type containing 2 (Znhit2), mRNA	1282	GC	CA	GCTCGGAAGAAGTGCCAGTTCCTGCTGGCTTGGACCAATGAAAACGAGGCTGCTCTCACACCCCTGGCTCTAGACTGTGCCAGAGCCCACCGAGCCCATGCTGTGACAGTTGAGGAGATGGCAACCCTTACTGGGGAGCTAGAACGGCTTTGGGGAGGCCCAGTACCACCTGCACCAAGGATTCTCATTGAGGAGCTTCCTGGCTGAGCTGGGCATCCATGTCATTACA	229	265
NM_001024895.1	Rattus norvegicus MAGE family member A14 (Magea14), mRNA	1456	TT	AC	TTGAC	5	41
NM_001107912.2	Rattus norvegicus RB binding protein 4, chromatin remodeling factor (Rbbp4), mRNA	1924				0	-
NM_001106476.1	Rattus norvegicus methionyl aminopeptidase 1 (Metap1), mRNA	2636	AG	TT	AGACTCGATAGTGCTCGGCCTCATTTCATGTCCCAGTT	38	74
NM_001105933.1	Rattus norvegicus actin related protein 2/3 complex, subunit 3 (Arpc3), mRNA	872	GA	AA	GAAAGCTCTCGGTCAAGAGTTTGGAGGGTGGGTGTCGGGTTTGAATTTCAAGCTGGTACTTCATATGTAATAAATGTCGCTGCTTATGTTAGACAGACATTGAA	104	140
NM_001025689.1	Rattus norvegicus proteasome 26S subunit, non-ATPase 14 (Psmd14), mRNA	1535	AA	AG	AAGTACTTCTCAGCAGAGGCCTGGGCGACTCTTTTGAATGGAATCGGGCTGATTCATCGCTGTGTCTCCGAGCCAGGTCCTTGTTGATTGTGAGGCGCTGCCCTCGCCGCCGCGTCGCCACTAGGCCAGGGAGAGAGAGAGAAAAAAAAAACTGCTTGTGGAAAATTGTATCTGCCAGAATTAGCAAGAATTGGAG	196	232
NM_001105901.1	Rattus norvegicus carbonic anhydrase 15 (Car15), mRNA	1100				0	-
NM_001106489.1	Rattus norvegicus NADH:ubiquinone oxidoreductase core subunit S3 (Ndufs3), mRNA; nuclear gene for mitochondrial product	1056				0	-
NM_001106674.1	Rattus norvegicus cytochrome c oxidase assembly factor 7 (Coa7), mRNA	2787	CT	TT	CTGCTCTAGAAGAAAGGCTTTGAAGGTTGTAAGCACAGCCACTGCCCTCTGAAGTTGGTACAGGAGACCGTTTTTCCTGAGCACACAGACAGCTT	95	131
NM_001014267.1	Rattus norvegicus keratin 88 (Krt88), mRNA	856	TG	CT	TGTCGTCCTGTAGACAGGGCCTGTGGCTACCTGAACCTTGCATCCTGCTCCTCTGACTGGTTCTATTCTTGCCCCTCCCCCCCCAGGCTTGCCCT	95	131
NM_001108046.2	Rattus norvegicus DEAD-box helicase 41 (Ddx41), mRNA	2075	GA	CA	GAAGGCAAGAAGGACGTCTTAGTGGCCACGGACGTGGCCTCTAAAGGCCTAGACTTTCCTGCCATCCAGCACGTCATCAACTATGACATGCCTGAAGAAATCGAGAACTATGTGCACCGAATCGGCCGCACTGGGCGCTCAGGAAACACAGGCATTGCCACCACCTTTATCAACAAGGCCTGCGATGAGTCAGTGCTCATGGACCTCAAAGCCTTGCTGCTGGAGGCCAAGCAGAAGGTACCACCTGTTCTGCAAGTGCTGCACTGTGGGGATGAGTCCATGCTGGACATCGGAGGAGAACGGGGCTGCGCCTTCTGTGGAGGCCTTGGTCATCGAATCACTGACTGCCCCAAACTCGAAGCTATGCAGACCAAGCAGGTCAGCAACATTGGCCGCAAG…	583	619
NM_001106237.1	Rattus norvegicus mediator complex subunit 29 (Med29), mRNA	1297				0	-
NM_001107422.1	Rattus norvegicus THAP domain containing 11 (Thap11), mRNA	1818	TA	AC	TACCACGGAGGAGGAGCTCCTGCGCAAGCTGAATGAGCAGCGGGACATCTTGGCCCTGATGGAAGTGAAGATGAAAGAGATGAAGGGTAGCATCCGCCATCTGCGTCTTACCGAGGCCAAGCTCCGTGAAGAACTTCGAGAGAAGGATCGCCTGCTTGCCATGGCTGTCATCCGTAAGAAGCACGGAATGTGAATGGTTCCTCCCAGAAACCTGCAGAATTCGTGACTCCTTCCAGCCCAAGGAATCCTCAGGCAGATGTTGAACTCCCCAATATTCTGGTTGACAGTGCTGAGGTTTAGGACAGTGGGAC	311	347
NM_001008339.1	Rattus norvegicus negative elongation factor complex member A (Nelfa), mRNA	2215	AA	GA	AAGGATGTGTTCCACCTAGCACTGCTGTCCACAGGCTCTGGGGCCCCAGCCAGTTCTCTGGGGAGTTTAGGCTTATTTTTTTATATTGTAATGAGTTAGTTTTTTGTGTGA	111	147
NM_001013045.1	Rattus norvegicus C-C motif chemokine ligand 24 (Ccl24), mRNA	1485	AA	AA	AAAAAAAGAACCAAAAAAAAAAAAAAAAAGAAGAAGAAGAAAATTTGAGGTCAGCCTGACCTAGTGTCACTCTCTTCCTTGCTGCTTCCCCAGAGCCATGTCTGCCCGTGTGCTGTCGTGCTCCTGCCTTGACGACAATGGACTGAACCTCTGAACTGTAATCCAGCCCCAA	172	208
NM_001107991.1	Rattus norvegicus leucine rich repeat containing 38 (Lrrc38), mRNA	2350				0	-
NM_001127653.1	Rattus norvegicus NK2 homeobox 6 (Nkx2-6), mRNA	1468	GG	GT	GGTTGAGGGGATGCGGGGGGGGGGGGGTTGAGAGAAAAAGGCCAGACCGTTGAGACTGACCAAGGAAGTGCCAGACAGGATTTTTATTGCCACCCACTCTCTGCAATGGGT	111	147
NM_001106155.1	Rattus norvegicus Wnt family member 8A (Wnt8a), mRNA	1692	GG	TG	GGCACCACCACAAAGTCACTTGTTGCTTAGTTGCACGACAGTGGAGGTGGGGACTGAACTTCTGGTGTAGGGGGACACAGACTGGAAAACTGGGACCTCACAGGGTTGGCCTGTAGACCTTCCACGATAGGTGGGGTAGGTGGATGATGTTACAGCATCTTCTTCGCAAGGCTGAAATCGGAACCTTGTTCTCCTGGCTTGTGGACCCAGCCTTTACCACACAGTTACTCTTGGACTTGAGGAGCTTG	248	284
NM_001106210.1	Rattus norvegicus ribonuclease T2 (Rnaset2), mRNA	963	CT	TC	CTGGCCAGGGAGGCTTCGACGCATGGGATGATGGTCTGCGAAGACGGCCCGATCTTCTATCCTCCACCCAAGTCCCAACACTGATGTTCACATTTTGGAAATATTTTATGTTCCACAAAGTAAGAGAAGTTCCCAAATCATTGCTTTCTAAAAATTCACTAAAAAGTTTC	170	206
NM_001014077.1	Rattus norvegicus C-type lectin domain containing 14A (Clec14a), mRNA	3165	CT	TG	CTGAGCAGTTCTGCCCTGGACTTCAGCCCTCCTGGGACCGAGGTGAGTGCGATGTGTCCCAGGGACTTCTCAGTCTCCTCCATCTGCGTCCAGGAAGAGACAGGCGCACGCTGGGATGGGCTTTTCCCTGGGAGCTTGCTCTGCCCCTGTTCTGGGAGGTACCTCCTTGCTGGCAAGTGCGTGGAGCTCGCTGACTGCCTAGACTACTTGGGAAACTTCGCCTGCGAATGTGCTGTGGGTTTTGAGCTAGGGAAGGACAAACGCTCTTGTGAGACCAAAGCGGAAGGCCAACTAACCCTCGAGGGGACCAAGTTGCCCACTAGAAATGTATCAGCCACTCCAGCCAGTCCTGTGACAAACAAATCGTGGCCAGGTCAGGTCTATGACAAGCCAGGAGAG…	1718	1754
NM_001170573.1	Rattus norvegicus family with sequence similarity 50, member A (Fam50a), mRNA	1334	TG	TG	TGAGCATCCAAAAGTGGGCATGACCTTGGCTCTCTCCAGCGTGTCCCCATGTCTCCAGGGCTCCAGGTGACCATGGCAGAGCACTCTGGGAGTATGGTAGTTGCTATTCCCTGACTTGATGTTGTCATTACTGCTTTTCCCTTTTACAATAAAAAAGTTCACATG	165	201
NM_001106738.1	Rattus norvegicus JNK1/MAPK8-associated membrane protein (Jkamp), mRNA	1455	TT	TT	TTCAAAAGCATTTATGCCGCACTTTACTTCTTCCCCATT	39	75
NM_001106376.1	Rattus norvegicus tripartite motif-containing 31 (Trim31), mRNA	2451	GT	TT	GTGTGGGAGGCAGAAATCTGGGAGCCCTCAGGTGGGGCATGCATCATTGGCGTGGCTACAGAGTTGGCTCAAGGGTCCCAGAGTCAAAACATCAGGATGCAGAACTGCATATGGGCACTGCGGATCTCACCCACTGGATGCCAGCCATTCACCAATTGTAAAACGCAGGAGCATCTCCAGGTCTGTCTCAAGAAAGTGGGTGTCTACGTGAATCATGACTGCGGGGAGGTCATCTTCTATGATGCCATCACTAGCAAACACATCTATACTTTCCAAACTTCTT	283	319
NM_001107213.1	Rattus norvegicus ubiquitin-like modifier activating enzyme 6 (Uba6), mRNA	6567	CA	GT	CAGCTGTCGAACATACTATCCAATGGGCAAGAGACAAGTTTGAAAGTTCCTTCTCCCATAAGCCTTCACTGT	72	108
NM_001107280.1	Rattus norvegicus protocadherin 20 (Pcdh20), mRNA	5179	GA	TT	GATATGGTGAAATTGGAGTCATTAGTGTAACAGATGCTGATGCTGGGAGGAATGGATGGGTAGCCCTCTCGGTAATGAACCAGAGTGATATTTTCGTCATAGATACAGGTAAAGGCATGTTGAGAGCTAAAGTCTCTTTAGACAGAGAACAGCAAAGCTCATACACTCTGTGGGTGGAAGCTGTTGATGGGGGTGAGCCCGCCCTTTCTTCTACCACAAAAATCACAATTCTCCTTCTGGACATCAATGATAACCCTCCCCTTGTTTTGTTTCCTCAATCTAATATGTCTTACTTGCTGGTCCTACCTTCTACTCTCCCTGGCTCACCAGTGACAGAGGTCTATGCAGTTGACAAAGATACAGGCATGAATGCAGTCATAGCTTATAGTATCATAGGGA…	608	644
NM_001105736.2	Rattus norvegicus cysteine-rich hydrophobic domain 2 (Chic2), mRNA	961	TC	CA	TCACGTCACCGTATTTGGACTGAGCAACAAATTTGAATCAGAATTCCCTTCTTCA	55	91
NM_001004445.2	Rattus norvegicus ring finger protein 113A2 (Rnf113a2), mRNA	1299	TT	TA	TTGTTACTAAGTGTAAACATTATTTCTGCGAGACCTGTGCATTGCAGCATTTCCGAACCACTCCACGGTGCTATGTTTGTGAGCAACAGACCCATGGGGTTTTCAATCCTGCCAAAGAACTGATTGCTAAACTGGAGAAATACCGAAAAGCGGAAGGTGGTACTTCTAACACTTCAGAAGACCCCGATGGAATCTAATTGCCTTTACTTAGATTTTTTGCAATTGTCAAATCTCAAAGTACTTTTTGTTTTGGTCACTTCAAACCAAAGCAACCGTAATTGAAGAAATA	289	325
NM_001107449.1	Rattus norvegicus chloride channel accessory 1 (Clca1), mRNA	3608	GT	CA	GTGTCTCTGTTCATCCCCGCTCAGGAGCCGCCAGAAGACTCAACTCCTTCTTATCCCGAAGTCAGCATCAACAGCACGATTCCTGGCATCCACGTGCTGAATATAGTGTGGAAGTGGCTAGGGGAAATGCATGTGACACTAGGTTTGCACTGAATCTTCAGGCAAGAAGTAAATCGCTCCTGTCATTGTATTTTAGACTTCCTGAAGGGGGCGATGTAGTAACACGTGAAGCTGTAAAATTGGGCCCAGGTGCA	254	290
NM_212505.2	Rattus norvegicus immediate early response 3 (Ier3), mRNA	1114	TT	AA	TTCTTGGGGCGAGCCCGAGGCACCGTGGGTCCTGGCTAGGCTCACTGGTGACGGACGGAGGTCTTCTCGGTGTCTAA	77	113
NM_001107535.1	Rattus norvegicus tyrosinase (Tyr), mRNA	3018				0	-
NM_001108571.1	Rattus norvegicus interleukin 1 family member 10 (Il1f10), mRNA	868	TT	TC	TTCACCTTTTTCCAGAGAAGCTTAGGCTCTGCCTTTAGGCTCGAGGCTGCTGCCTGCCCTGGCTGGTTTCTCTGTGGCCCAGCCGAGCCCCAGCAGCCAGTGCAGCTCATCCAAGAGAGTGAACCTTCTACCCGTACTGAATTTTACTTTGAGCAGAGTCGGTAGGGAGGCATGAGGTTGGGGTCCAGCCTAGTGCCCCCAAACTCAGCCCCTCTTGCTTGGCATCTTATGGAAAGCAGAATAAGGATCCACCAAAGATGTTTAGGTC	268	304
NM_001106409.1	Rattus norvegicus actin, beta-like 2 (Actbl2), mRNA	2748	TC	AA	TCCTCCTATAGTTCATAGAAAATGCTTCTAAATGAGCTACCAGGTCCCTTTTCCTAGGTCAGAACGATGGTACCCACCTCACCCAGGAAAA	91	127
NM_199111.1	Rattus norvegicus NFKB inhibitor epsilon (Nfkbie), mRNA	1669				0	-
NM_001025675.1	Rattus norvegicus tubulin, beta 6 class V (Tubb6), mRNA	1776	CC	CC	CCCCATCAGAGTTAGCGGGGGAGTTAGAATAAGGATTTGTTTTTCATCCTTGGTGATAAAAACTGAAGCCACACCGTGCTGCC	83	119
NM_001108087.1	Rattus norvegicus keratocan (Kera), mRNA	1972	TA	AT	TACCTGTACCTGGAAAACAACCTGATTGAAACAATACCAGAGAAGCCATTTGAGAATGCCACCCAGCTGAGATGGATCAAT	81	117
NM_001106700.1	Rattus norvegicus ISG15 ubiquitin-like modifier (Isg15), mRNA	663				0	-
NM_053940.1	Rattus norvegicus protocadherin alpha 12 (Pcdha12), mRNA	5250	AA	TT	AATATCAGCTCATAGAAAGTAATAAAATTTGCTGTTACCATAAATAAGACATT	53	89
NM_001079890.1	Rattus norvegicus G protein-coupled receptor, class C, group 5, member A (Gprc5a), mRNA	2094	GT	TT	GTATGCAATAAAGATGTGGTCGCAACTATTTT	32	68
NM_001025716.1	Rattus norvegicus vacuolar protein sorting 4 homolog B (Vps4b), mRNA	2848	GG	TT	GGCATGTGGAACAGCAGAGTGGGGACAGCGAGGAGCCTCACCCTGCTTCATGGACAGCAGCTAGGATTCTCATGAGCACTCACTCAAAGAGCAAGGCCTTTCTTTTTCCTTTT	113	149
NM_001131006.1	Rattus norvegicus signal peptidase complex subunit 1 (Spcs1), mRNA	722				0	-
NM_053757.1	Rattus norvegicus aminoacyl tRNA synthetase complex-interacting multifunctional protein 1 (Aimp1), mRNA	1081	AT	AA	ATGGTGGTTTTGCTTTGTAATCTGAAGCCTGCAAAAATGCGGGGAGTGCTGTCCCAAGCAATGGTGATGTGCGCCAGTTCACCAGAGAAAGTGGAGATTTTGGCCCCTCCCAACGGGTCTGTTCCTGGAGACAGAATTACTTTTGATGCTTTCCCTGGAGAGCCTGACAAGGAGCTGAACCCTAAGAAGAAGATCTGGGAGCAGATCCAGCCTGACCTGCACACCAATGATGAGTGTGTAGCCACATACAAAGGAGCTCCCTTTGAGGTGAAGGGGAAGGGAGTTTGCAGGGCCCAAACCATGGCCAACAGCGGAA	316	352
NM_001009636.1	Rattus norvegicus PRELI domain containing 1 (Prelid1), mRNA; nuclear gene for mitochondrial product	1151				0	-
NM_001107293.1	Rattus norvegicus ELL associated factor 1 (Eaf1), mRNA	4853	TG	TA	TGCTCCTACTCTGGCTGGGGAAGAGATAGAGGCAAGTACCTAGTGAAGGACAGAGGGTAACACAGGGAAACATTCCAGCCATTGAGACAAAGCTGAAAATACGTACACAAGGCCATGCAGGGCTCTACTGAATCTGTAAATTACCTTTTATTTGCTCTATGCAATGTTGGCCACTTGGGTGAGGTGGGAACTCACTCTACCGAGACGCCATGGCAATCCTTTGCAAACATTGGGAAATGCAATATATATAAACTAGAGGTTTGTAGTAATGCCACTTGTAGCTGAATTCCATAGCAGAGTAATCTTCTCTGTGGGTGATGTGCTGTAGCATAGGGAAACTTGAAAATTCCAAAGTCCTGCCCTTTTTTGAGAGACTGGTTTAGTTTGTGTGTATGTGTG…	444	480
NM_173321.1	Rattus norvegicus hemiferrin, transferrin-like protein (LOC286987), mRNA	842				0	-
NM_001014222.2	Rattus norvegicus DMRT-like family C1c1 (Dmrtc1c1), mRNA	1539	CT	AC	CTGGCTCCACTTCACCTCCTGTTGAGCATCTGGAGTGCACCTCCCTCTTGAAC	53	89
NM_001100581.1	Rattus norvegicus cilia and flagella associated protein 161 (Cfap161), mRNA	1416	GC	TC	GCCGTGGAGCAGGCCATGGGCATCAATACATAGTGACGTACCAGGCATTCGTGTGGCTCTTGTCAGCTGCAGGTC	75	111
NM_001108988.1	Rattus norvegicus epoxide hydrolase 3 (Ephx3), mRNA	1607				0	-
NM_001108582.1	Rattus norvegicus death associated protein-like 1 (Dapl1), mRNA	557				0	-
NM_001108980.1	Rattus norvegicus Fer3-like bHLH transcription factor (Ferd3l), mRNA	890	AA	GT	AAGAGGAGGAAGAGGAGGGAGAGGGGCGCGGCCGAGTAGCATCCTTGCTGGGCCGCCCCAAAAGGAAAAGAGTCATCACTTATGCCCAGCGCCAGGCCGCCAACATTCGCGAGAGAAAGAGGATGT	126	162
NM_001077672.1	Rattus norvegicus cleavage stimulation factor subunit 3 (Cstf3), mRNA	2028	AG	AA	AGAAATCTGGGCTCGGTTTCTAGCTTTTGAAAGCAACATTGGTGATTTAGCTAGTATTCTCAAAGTGGAGAAAAGACGCTTTACAGCGTTCAGAGAAGAGTATGAAGGCAAAGAAACAGCTTTATTGGTAGACAGATACAAGTTTATGGATTTATACCCTTGTTCTGCAAGTGAACTCAAAGCACTGGGCTACAAGGTATGTACTCAGCAGCAAGATGGCCGCAGTGTTCCCCTTCCCCTACGGTTTCAGGAGTCCATGCACTGCACAGTTTTCATTCTACGGTCAATTCTTTACTCTGTTGCTACTAAGACAAAAATATTTCATTGACTTTATTTATTTTGTTGTTGTTTATGGAAATCACAAGTAACAAAAAAATGGAAA	382	418
NM_001014272.1	Rattus norvegicus prostaglandin E synthase 3-like 1 (Ptges3l1), mRNA	1635	CC	TG	CCTCACCACCCATCGCGTGCTTGCAAGCTCCTTCTCAGTCCTTGCGCCCCTTTCCTACACTTTCCTCCTCTCCTGGGCTGAGGGAGCTGCTTTCTGTGCAAGTTGAATTCTGGGCATGGAGGCAGCCGCTGCTGCTGCAGCTGCCTAAGGGGAGCGAGGAGAGGTTGCGACCAAGTAGAGACCTGCTGAAGTTGCTTCTCGAGAGGAGTGGACTCACCAGCTGTCCCCAGCGAGGCCTGCCCACCAGTTTGCCTGGCACTTTGTCCAGTTCACCATGCAACCTGCTTCTGCAAAGTGGAAGACTGAATGGGCTATGTATGTATTGAATTTTGTGGTTTAGACAGTAAAGATG	352	388
NM_001127527.2	Rattus norvegicus YEATS domain containing 4 (Yeats4), mRNA	1204	CT	AT	CTACCTCTTTTGTATATGATGTGTCTAGGAAGTAT	35	71
NM_001025682.1	Rattus norvegicus cerebellar degeneration-related protein 2 (Cdr2), mRNA	2372	GG	AT	GGCCAGTGGCTGGGAACCCACCCCTGTAAGCCCAGAGCCCATCAGTTCCCCCACCACTACACCTCCAGAATACAAAGCACTAT	83	119
NM_001106585.1	Rattus norvegicus LSM8 homolog, U6 small nuclear RNA associated (Lsm8), mRNA	797	GC	CA	GCCCAGCAGCATGACGTCTGCCTTGGAGAACTACATCAACCGAACTGTTGCAGTAATAACTTCTGATGGCAGAATGATCGTGGGAACCCTGAAAGGTTTTGACCAGACCA	110	146
NM_001025414.1	Rattus norvegicus histidyl-tRNA synthetase 1 (Hars1), mRNA	1957				0	-
NM_001025701.1	Rattus norvegicus RAD21 cohesin complex component (Rad21), mRNA	3582	AG	TC	AGTTAGAGCTTCTACCAGAAAAGGAGAAGGAGAAAGAGAAGGAGAAGGAGGAGGAAGAAGAGGAGGAGGATGAAGATGCTTCAGGGGGTGATCAGGATCAAGAGGAAAGGAGATGGAACAAAAGGACTCAGCAGATGCTTCATGGTCTTCAGCGAGCTCTTGCTAAAACTGGAGCAGAGTCGATCAGTTTGCTTGAGCTATGTCGAAACACAAACCGAAAGCAGGCAGCAGCAAAGTTCTACAGCTTTTTGGTTC	255	291
NM_001034110.1	Rattus norvegicus cathepsin F (Ctsf), mRNA	1922				0	-
NM_001108682.1	Rattus norvegicus toll-like receptor 12 (Tlr12), mRNA	3006				0	-
NM_001108405.1	Rattus norvegicus leukocyte cell-derived chemotaxin 2 (Lect2), mRNA	820	AC	CA	ACATGTGACAGCTATGGCTGTGGACAGTACTCTACTCAAAGAACCCAAAGGCATCATCCAGGTGTGGACGTCCTGTGCTCAGATGGATCTGTGGTGTATGCGCCATTCACGGGGAAGATAGTGGGCCAGGAGAAACCCTATAGAAACAAAAACGCCATCAATGATGGCGTCCGACTGTCGGGAAGAGGTTTCTGCGTCAAAATTTTCTACA	211	247
NM_001106186.1	Rattus norvegicus cap methyltransferase 2 (Cmtr2), mRNA	3553	TG	AC	TGCCCCCCAGCAGGTTTTACAGTTTGTACCAATGGAGGTGCTCCTTCAGGGGACACTGCTTGATTTTTTGTGGGATCTGAATGCTGCCATTGCTAAAAGGCATTTGCATTTGATTATCCAAGGAGAGAGAGACAAAGTCATCAGCAGCCTCGAGTTGTAAAATTGAACATGGCGTTGTTGATGTGTCGTTTTGCAAC	197	233
NM_001108258.1	Rattus norvegicus G protein-coupled receptor 101 (Gpr101), mRNA	2186	AG	CA	AGCAGGAAGCCTGGATTTCTGTGCAAGTATCCTGGCGGCTATGGGCAGTGAAGAGGTCAGTAATGGGAGCATGGAGGGGCTGGAACTGAGCACTGAAATCCAGGCTAGCAGCGCAAAGGCAAACACGGACCGCAGAGATGTCAATCAGTGCAACATTTACGTGGGCGAAGATGACGTAGAGTTTGGCATGGATGAAATCCATTTCAACGAGGATGATGTCGAGGCAATGCGTATTCCAGAGAGCCGTCCACCCAGTCGTCGAAACAGCACCAGCAACCCACCTTTGCCTCCATGCTATGAGTGCAAAGCTGCTAGAGTGATCTTCATCATCATTTTCTCCTATGTGCTGTCTCTGGGGCCCTACTGCTTCCTGGCAGTGCTGGCTGTGTGGGTGGATAT…	500	536
NM_001083313.1	Rattus norvegicus charged multivesicular body protein 1A (Chmp1a), mRNA	2114	CC	TC	CCCTCTGCCGTCAGCCTCCCAGGCCTTTTTAGAGCGGCTCATTCCTGATTGTCTGGCTCTCCTGTCCTTTTAGACAAAGGCTGCTGCTTTCTGCCTTCTCCAAGGGAGAGTCACGGTGGCTAACAAAGGGAGCCTGAGTCAGTCACTCTGGCTGCTGGCAGCAAACGCTTACATCCTTCCGCAGTGAGGAAGCTGGCGGCAAGCAGGCAGTGCGGCTGACTGGGCAGCCTTGAGACTCTGTACAGGCTGCTGTTTTATTTTTCTGTCTCCTGAAGTTTACTCATGTTC	288	324
NM_001012353.1	Rattus norvegicus interferon-gamma-inducible GTPase 2 like 1 (Ifgga2l1), mRNA	1628	GG	CT	GGAGTCTGGAGCAGGAAAGTCCAGCTTCATCAATGCCCTGAGAGGCATTGGGCATGAAGAGGAAGGTGCAGCTGAAATTGGGGTGGTGGAGACAACCGCGGAGAGATGGCCGTACAAACACCCCAGTATGCCTAATGTGGTCATTTGGGACCTGCCTGGGATTGGAACCACAAATTTTCCACCAAAAACGTATCTAGAAAAGATGAAATTCTATGAATATGACTTCTTCATTATTATTTCAGCCACCCGCT	251	287
NM_001107945.1	Rattus norvegicus DMRT-like family A1 (Dmrta1), mRNA	4030	GA	TC	GATCATCTAACGGTAATGTTACCATGGAGAAACAGGGCTTCATGTCATCTATTTCAGAACAGTCGGACAAATCGACCATCATCCTGTCTCCTTGCCCCACGGATCAGTCAGGAGGAGAAGACAGCCCCAGGTCCTTCTCTTCCTCTGACCTGGAATCAGGGAATGAAAGCGAGTGGGCCAGAGACTACACTGCTACCACAGCCAGCCTTTCCACGGTGACCTCAAGACCACGAGACCCTCTCGGAATTCTTACCAGGATTTTTCCAGGTTACAAGCGTAGCCGCTTAGAAGGCATCCTACAGTTCTGCAAGGGAGATGTAGTCCAAGCCATTGAACAGATC	341	377
NM_001106689.1	Rattus norvegicus zinc finger protein 593 (Zfp593), mRNA	2010	AA	CT	AAGTAGCCAGGAGTCAGGCGTCGAAATCTCATAGTGAGGGCACTGGTCTCTCTGTTGGCCTGTGAAAGGGAGCAGAAATGAAGACTAGATGTCGCCCAGGGTACCAAGGAGTGGAAACCATAGCGTAAGGTCCCTGACCTATTTGCCTGGGCACCGTGTGGCTCAGAGGATGCTCACCGATGCTGCCTTACCCAAGTCTGGCAGGGGGCGGGGCAGCTGGATCT	224	260
NM_001107467.2	Rattus norvegicus zinc finger protein 54 (Zfp54), mRNA	2095	GA	TC	GATGTGGCTGTGGACTTCTCCCAAGAGGAGTGGGAATGTCTGGCCTCTCCTCAGAGGGCTTTGTACATTGATGTGATGTTGGAGAATTACAGCAACCTGGTCTCTGTTGAGAACTACTGCATATGTGATACTGTCTGTCAACCTGTGAAGACTGAAAGGGAGTCCTGTCAGTGTAATGAGCTTGGTAAAATGCTTCATGATCCCTCTCATGGTGGACTTTACAAAAGAAGTGACACCACAGAAACCTCTAATAACTACAGATGCTGTAAGGACAGGGATGTCTCTGTTGACTCATCAAACCCAGATCAACATAAAAGCACGCACACTGGGGAAGAACCTTGCACATCTGAAGACTGTGAGAAGTCTTTCGATTTGTGTTCCAACATTACTCAAGATCAG…	634	670
NM_001106273.1	Rattus norvegicus mesoderm posterior bHLH transcription factor 2 (Mesp2), mRNA	1857	CC	TT	CCAGAGCCTGACCAAGATCGAGACGCTGCGTCTGGCCATCCGCTACATCGGCCACCTGTCGGCCCTCCTGGGCCTCAGCGAGGACAGTCTGCGGCGCAGGCGCCGACGGAGTGCGGACGCCGCCTTCTCTCACCGATGCCCTCAGTGCCCTGATGACAGCAGCCCTTCGCAGGCTCAGATGCTCGGTCCTAGCTTGGGATCAGACATCAGTAGTGGGCTGTCCTGGGGGTGCCCTCCTGCTTGTCCTGGACCCATAATCTCACCTGAAAACCTTGGGAGCAGAATCTCCAACGTGGATCCCTGGGTAACACCTCCTTACTGTTCCCAAATACAGTCACCCTTACATCAGTCCCTAGAGAGAGCCGCTGACACCTCTCACTGGGCACCACCCCACGCATG…	837	873
NM_001134560.1	Rattus norvegicus RD3 like (Rd3l), mRNA	1247	GT	AG	GTTTCTCTGCTACAGCGTCAGGGTTTAG	28	64
NM_001108672.1	Rattus norvegicus BEN domain containing 5 (Bend5), mRNA	1834	AG	CA	AGTTACGGAGCACTTTCAGTGAGGAAGCAAACACGTCGTCCTATTACCCCGCTCCTGCGCCTGTCATGGACAAGTATATCCTAGACAATGGCAAGGTCCATCTGGGAAGCGGGATTTGGGTTGACGAGGAGAAATGGCACCAGCTACAAGTTACCCAAGGAGATTCTAAGTACACGAAGAACTTGGCAGTCATGATCTGGGGAACAGATGTTCTGAAAAACAGAAGTGTCACAGGAGTCGCCACAAAAAAAAAGAAGGATGCAATCCCAAAGCCACCCCTCTCTCCTCATAAGCTAAGCATCGTCAGAGAGTGTTTGTATGACAGAATAGCACAAGAAACGGTGGATGAAACGGAAATTGCACAGAGACTCTCCAAAGTCAACAAGTACATCTGTGAGA…	852	888
NM_001108387.2	Rattus norvegicus succinate-CoA ligase ADP-forming subunit beta (Sucla2), mRNA; nuclear gene for mitochondrial product	2125	TC	GT	TCGCAGACTACAGTGCGAGCCACGGCCCAGGCTCTGGGAAGTTCTGGATTGT	52	88
NM_001277302.1	Rattus norvegicus eukaryotic translation initiation factor 3, subunit F (Eif3f), mRNA	1280	AT	GC	ATCCAGGATGCTCTAAGCACTGTATTGCAGTATGCTGAGGATGTGCTGTCTGGGAAAGTGTCTGCTGACAACACAGTAGGCCGCTTCTTGATGAGCCTTGTCAACCAAGTACCCAAGATAGTTCCTGATGACTTTGAAACCATGCTCAACAGCAACATCAACGACCTGCTGATGGTGACCTACCTGGCCAATCTCACCCAGTCACAGATTGCCCTCAACGAGAAACTTGTAAACCTGTGAATGGGCCCCAAGAGCACTTGTGCTGGTCGAGGTTTTCACCACAGGCTTGAGACTGAAGTGGAGGCAAAGGGTTTCTTTGTGGTCTTGAGTCACAGTGACTCAATCAGCTCCTTGTGACTCCAAATAAACAGAGC	374	410
NM_001106183.1	Rattus norvegicus transmembrane p24 trafficking protein 6 (Tmed6), mRNA	867	GG	TG	GGTCCTCCAGCTCTATTTCCTGAAACGGCTTTTCACCATCTCAACTGACACAAAGAAGCCAAGATGCTAACATAGAGCATTATATGTCAAAGATTTGATCAAATCAGCTTTG	112	148
NM_001106850.1	Rattus norvegicus SRY-box transcription factor 14 (Sox14), mRNA	1937	GA	GC	GACCTGAAGGGTGGTGTGGAAGCAGAGATCTGATTCCTTTCCTTTGCACCTAGTCTGGCCCACAGATGCCTCTGGGTCAGGCCTACTGCTGCCCCCTGCCCACCCCAGACTCTGCCTCTCTCTTCCAGGGGAAAAGGGAGGGGCCGCCATCCTGGACCCAAGGCACAGACTCGTGCTGGAAATTTCCAAACGTTTAGAAAGCTACACATGTTCCCCTCTCCCGACTCTCCCAAAGCAAACCTCCGACTGTACCCCCTTTGGACAAAAAAAAAAGTAGGCAATTTGCTTTATTTACGTCCCCCTCACTGTCCGCGGATAGGCTTTGGACTCGGAACTCCCAGATCCTGGTATTATATCTAGAACATGCGTATATATATTTTTCCTTTCCCACTGAAGAAA…	473	509
NM_001106234.1	Rattus norvegicus ETHE1, persulfide dioxygenase (Ethe1), mRNA; nuclear gene for mitochondrial product	967	GC	CG	GCTGTCAGTCCGTCATCTCTCGCCTCAGCGGAGCTCAGGCTGATTTGCATATCGGGGAAGGTGATTCCATCCCCTTTGGACGCTTTGCTTTGGAGACTCGGGCCAGCCCTGGCCACACCCCAGGCTGTGTCACCTTTGTCCTGAATGACCAGAGCATGGCTTTCACTGGAGATGCCCTACTGATCCGAGGGTGTGGACGAACAGACTTCCAACAAGGTTGCGCGAAGACTTTGTACCACTCAGTGCACGAGAAGATCTTCACACTTCCAGGCAACTGTCTAATCTACCCTGCTCATGATTACCACGGGCTCACAGTTTCTACTGTGGAGGAGGAACGGACTCTGAACCCACGGCTCACTCTCAGCTGTGAGGAGTTTATCAAGGTCATGGACAACCTGA…	503	539
NM_001037153.1	Rattus norvegicus protocadherin gamma subfamily A, 11 (Pcdhga11), mRNA	4688	TT	GG		0	-
NM_001106521.2	Rattus norvegicus nuclear transport factor 2-like export factor 1 (Nxt1), mRNA	881	GG	TT	GGCCGAGTCGCCTAGGCGACGTTGACCGAGACCGAGCAGTCACTGGATCCCTAAGGAGGCGGCATTCTGGCAGAGGCCTCTGGCAGCAGACCCAGAGATGGCATCAGTAGATTTCAAGACCTATGTGGACCAGGCCTGCAGAGCTGCAGAGGAATTTGTCAACGTCTACTACACTACTATGGATAATCGGCGGCGGCTGCTGTCTCGCCTGTACATGGGCACGGCCACTTTAGTATGGAATGGAAATGCCGTTTCGGGACAAGAATCCTTGAGTGAGTTTTTTGAGATGTTGCCTTCCAGTGAGTTCCAAATCAACGTGGTAGACTGCCAGCCTGTTCATGATGAAGCTACGCCAAGCCAGACCACGGTCCTTGTGGTCATCTGTGGAACAGTGAAATT…	696	732
NM_001100859.1	Rattus norvegicus secretoglobin, family 1B, member 30 (Scgb1b30), mRNA	401				0	-
NM_001108597.1	Rattus norvegicus cystatin 9-like (Cst9l), mRNA	683				0	-
NM_001106324.1	Rattus norvegicus beta-1,4-glucuronyltransferase 1 (B4gat1), mRNA	1980	CC	GT	CCCTTCTATTATGGGCTATGCACGCCTTGCCATGCGCCCACCAACTACTCCCGCTGGGTCAACCTGCCAGAAGAGAGTTTGCTGAGACCTGCCTACGTGGTGCCCTGGAGGGACCCCTGGGAACCGTTTTACGTGGCTGGAGGAAAGGTGCCCACATTTGATGAACGCTTTCGGCAGTATGGTTTCAATCGAATCAGCCAGGCTTGTGAACTGCACATGGCAGGGT	226	262
NM_198786.2	Rattus norvegicus mal, T-cell differentiation protein 2 (Mal2), mRNA	2800	CA	GC	CAGAGCCTTGGATGTATAGCAAAATAAGGTAGTAAATAAACTCCAAACTAATGATTTCCTAACAGCTCAGCAAGGCACTCACACGAGAGTGC	92	128
NM_001108706.1	Rattus norvegicus EF-hand calcium binding domain 10 (Efcab10), mRNA	859	TC	CA	TCTCA	5	41
NM_001037156.1	Rattus norvegicus protocadherin gamma subfamily A, 8 (Pcdhga8), mRNA	4689	TT	GG		0	-
NM_001108474.1	Rattus norvegicus CEA cell adhesion molecule 12 (Ceacam12), mRNA	1047	AC	TT	ACACTATACTCTACAAATAATCACTACAAATGCAAGACCTGAAATAATACGTGCAGAATTCTTTGTACACAGTCCAACTTTAGGCTACAGGAAGCATCTTACCCCTTCACAACTCTCAACTGAGTTGGTGCCGCCTAGAGTTACTGAAAATGACAATATTTTTCTACTGGCGTACAATCTGCCAGAGAAACTTCAAAGCTTTTTCTGGCACAAGGGAGTACATCCACTTGACCGTT	236	272
NM_001105886.1	Rattus norvegicus homeo box D13 (Hoxd13), mRNA	2483	AC	CA	ACATGTGCGTCTACCGTCGGGGAAGGAAGAAAAGGGTACCTTATACCAAACTGCAGCTCAAAGAACTGGAGAACGAGTATGCCA	84	120
NM_001107562.1	Rattus norvegicus beta-1,4-N-acetyl-galactosaminyl transferase 4 (B4galnt4), mRNA	3546				0	-
NM_182818.1	Rattus norvegicus polypyrimidine tract-binding protein (Smptb), mRNA	1883				0	-
NM_001108519.1	Rattus norvegicus membrane spanning 4-domains A8 (Ms4a8), mRNA	1181				0	-
NM_001195270.1	Rattus norvegicus TEX13 family member C (Tex13c), mRNA	2223	AT	TC	ATTCTATGACATCTCCGAGAAACTTCTCATGAATCCTCTAAAAAACATTCTTCACTCTTTTCTTC	65	101
NM_001100710.1	Rattus norvegicus ALG2, alpha-1,3/1,6-mannosyltransferase (Alg2), mRNA	3049	GG	TC	GGACACTCCACATATAAACTGTATACCAAGCTTCATATTTCAGACATGTTTC	52	88
NM_053660.2	Rattus norvegicus G protein subunit gamma 10 (Gng10), mRNA	1090	GA	TT	GAGCCCAGGTCCTGTGCTTTACTTTGAAGACTGGGAAGAAGCTCTCTGAGGAACCTGTGTGTGCATGGTGATGGATGACTACCGCCAAGTCCCAAGAAAACAGATTTCAAGAGCCAAATCATTTTCTCTGTGGCCTGGTCCTAGGTCAAAATTCTACAGAAATCAATGTTTTGTCTTATTTT	182	218
NM_001108862.1	Rattus norvegicus RAS-like, family 10, member A (Rasl10a), mRNA	974	CG	TT	CGGGAGCGCCAGAGGCACCCATCCTGGTGGTGGGCAACAAGCGGGACCGTCAGCGGCTGCGCTTCGGACCTCGTCGTGCACTGGCCACTCTAGTTCGAAGGGGCTGGCGCTGTGGCTACCTCGAGTGCTCAGCCAAATACAATTGGCACGTGCTGCGTCTCTTCCGAGAGCTTCTACGTTGTGCTTTGGTGCGCACACGTCCTGCACATCCCGCTCTGCGTCTGCAGGGGGCGCTGCACCCAGCGCGCTGCAGCCTCATGTGATCAGATTGAACAGGGAAATTTCATGAAAGCAGGCTCCCACCCAGACTCCTGGCCAACGGGCTTTTCTTTGATCTTGATTGGACCCAGCCAACTCCCAATCATTGGACAAGATCAGTTTTTTTCTAAGACCTTATTG…	537	573
NM_001034944.1	Rattus norvegicus GRB2-related adaptor protein 2 (Grap2), mRNA	1288				0	-
NM_001008332.1	Rattus norvegicus collagen type IV alpha 4 chain (Col4a4), mRNA	1190	GC	TA	GCTATCCAGGAGAGAGAGGAGCTCCTGGCCCTGGCGGCCCCCCTGTAAGACACCATTAGCACAGTCTAGAGTGGTCCTGAGTGAAAAGACTTTATGTACAGCAGGAACTGGCTGGTCTACTCGGGAATGGCCTCACTGCACCTTTGCCTGCCTGCAGCAGGACAACTAAACTGGGTGCTTGGGGGAGGGGGAGACGAGGTGGGCAGAACCAGAGCATTTAGGGGCTTCATGGGCGGTGGAAAGGGAAGATACTGAGGGTA	260	296
NM_053455.2	Rattus norvegicus fibrinogen-like 2 (Fgl2), mRNA	3720	GG	TC	GGCTC	5	41
NM_001108063.1	Rattus norvegicus zinc finger protein 763 (Zfp763), mRNA	3382	AG	TG	AGATATGCTTATTTTCAGATGTATGAAAAAATCCACACAGGAGCGAAACCATTTATGTGTAAGCAATGTGGAGAAGCCTTTG	82	118
NM_001108324.1	Rattus norvegicus RAN binding protein 1 (Ranbp1), mRNA	1052	TT	TT	TTTGCTTCAGAGAATGACCTCCCAGAATGGAAGGAGCGAGGCACTGGAGACGTCAAGCTTCTGAAGCATAAGGAGAAAGGGACCATCCGCCTTCTCATGAGGAGGGACAAAACCTTGAAGATATGCGCCAACCACTATATCACACCAATGATGGAGCTGAAGCCGAATGCTGGCAGTGACCGCGCCTGGGTCTGGAATACCCACGCCGACTTTGCTGACGAGTGTCCCAAGCCTGAGCTGCTTGCCATCCGCTTCCTAAATGCTGAGAACGCACAAAAGTTCAAAACAAAGTTCGAAGAATGCAGGAAAGAAATTGAAGAGAGAGAAAAGAAAGGACCAGGCAAAAATGATAATGCTGAAAAGGTGGCTGAGAAGCTGGAAGCCCTTTCAGTGAGGGAG…	472	508
NM_198790.1	Rattus norvegicus regulator of G-protein signaling like 2 homolog (mouse) (Rgsl2h), mRNA	1008				0	-
NM_001037973.1	Rattus norvegicus dual specificity phosphatase 9 (Dusp9), mRNA	2610	AG	CT	AGAAGATGGGGTCTCAGCTCGAGAGCTAAGGGGGAGGGAGGGAAAGATGAAGGCCTCAATTTTGCTGCTGTACGTCTCACACAGCCACTGTTGGTTTGGGGGGCAGGGAAGGGACCAAGCTGCAGACACACATGGTCATTCATTTCAGTCCACACCCCGTTGTAGACAGTTTGTGTATGTGTGTGTGTGTGTGTGTGTGCGCTCGTGCACGCACATGCACACTGGCCCACTCACATACTCAGCTTGGAGCTGGCAGTACCTATGGCAGCAGGACCATCTAGTCTTTGAACCTGGAAAAACTTGTGCTTCTTTGTTTTTGTAATCCACATCAAAATCACTTTCT	343	379
NM_001106219.1	Rattus norvegicus pre-mRNA processing factor 31 (Prpf31), mRNA	2404	AC	TT	ACCCAACAAGAGCCAGAGGATTATTGTCCCTCAGGCTAGAAACTTCACCCACACAAAGTGAAGCACCTAAAAGGTTTGGGAAGTATGTTCAGAAAGCACCACCCAGTACTGCATTCATGGTGCAGCCTATTT	132	168
NM_001004240.1	Rattus norvegicus glycosylphosphatidylinositol anchor attachment 1 (Gpaa1), mRNA	2043				0	-
NM_053943.1	Rattus norvegicus protocadherin gamma subfamily C, 3 (Pcdhgc3), mRNA	4614	TT	GG		0	-
NM_031823.1	Rattus norvegicus wolframin ER transmembrane glycoprotein (Wfs1), mRNA	2742				0	-
NM_001013228.1	Rattus norvegicus dynein light chain Tctex-type 3 (Dynlt3), mRNA	2109	GG	TG	GGATAGCCACCATGGACGGGTACCAGCGGCCCTGCGACGAGATTGGCTTCAATGCTGAGGAAGCACATAATATAGTCAAAGAGTGTGTTGAAGGAGTCTTGGGTGGTAATGACTATAACCAGAATAGCATCAACCAGTGGACCGCAAGCATCGTTGAACAATCTATAGCTCATTTGGTCAAACTGGGGAAAGCTTACAAGTACATCGTGACCTGTGCAGTAGTCCAGAGGAGCCCATATGGATTTCACGTGGCCAGCTCCTGTTTTTGGGATACAACATCTGATGGCACCTGTACCGTTAGATGGGAGAATCGAACCATGAACTGCGTTG	330	366
NM_020096.1	Rattus norvegicus interferon-induced protein with tetratricopeptide repeats 1 (Ifit1), mRNA	2174	CT	AG	CTTGTGGAGAGCACCAGCCTTCTTGGACTGGTCTTCAAACTGAAAGGGCAGGAGATGAAGGCCCTGCTTTACTATGAGAAGGCCCTGAGGCTCTCTGGGGAAATGAACCCTGCATTTTGAATGCAGCTTACCTTTGTGAAG	141	177
NM_138906.1	Rattus norvegicus ADAM metallopeptidase domain 6A (Adam6), mRNA	2508	TG	CC	TGTTCTGAAGGCCACCCCACTTGGCGCTACATCTCATCAGAGGTGGTTATTCCTCGGAAGGAGATCTACCACAGCAAAGGAATTCAAACACAAGGACGGCTCTCCTATAGCTTGCGTTTTAGGGGCCAGAGACATATCATCCACCTGCGAAGAAAGACACTAATTTGGCCCAGACACTTGTTGCTGACAACTCAGGATGACCAAGGAGCCTTACAGATGGATTACCCTTTTTTCCCTGTAGATTGTTACTATTTTGGCTACCTAGAGGGAATCCCTCAATCCATGGTCACTGTGAATACTTGCTATGGAGGCCTGGAAGGGATCATGATGTTGGATGACCTTGCCTATGAAATCAAACCCCTCAACGATTCACAGGGGTTTGAACACATTGTTTCTCAG…	454	490
NM_019369.2	Rattus norvegicus inter-alpha-trypsin inhibitor heavy chain 4 (Itih4), mRNA	2992				0	-
NM_053538.2	Rattus norvegicus lysosomal protein transmembrane 5 (Laptm5), mRNA	2170	TC	CC	TCCTTCTAAGGTACCCTTGATGACACTGCAGCTGCTGGACTTCTGTTTGAGCATCCTGACCCTGTGCAGCTCCTATATGGAAGTGCCCACCTACC	95	131
NM_053320.1	Rattus norvegicus HGF activator (Hgfac), mRNA	2067				0	-
NM_001107377.1	Rattus norvegicus mex-3 RNA binding family member C (Mex3c), mRNA	3213	AA	AG	AAAATGTTGATCGAGCACGAGAAGAAATAGAAATGCATATTGCCATGCGTACAGGGAACTATATAGAGCTCAATGAAGAAAATGATTTCCACTATAACGGTACCGATGTGAGCTTTGAAGGTGGCACTCTAGGCTCTGCGTGGCTCTCTTCCAATCCAGTTCCTCCAAGCCGAGCAAGAATGATGTCCAACTATCGAAATGATAGTTCTAGTTCTCTAGGAAGTGGTTCCACTGATTCCTATTTTGGAAGCAATAGGCTGGCTGACTTTAGTCCAACAAGCCCGTTTAGCACAGGAAACTTTTGGTTTGGAGATACACTACCGTCTGTAGGCTCAGAAGACCTTGCAGTAGACTCTCCTGCCTTTGACTCTTTACCAACATCTGCTCAAACTATCTGGA…	414	450
NM_001013434.1	Rattus norvegicus RAS related 2 (Rras2), mRNA	2282	TA	TT	TACCTTTGTAGCCTTAGACCGATGATCACCGTGTTAGCCTTACACCAAGAAGCTGGCTAATCCTTTATGTGAAGCTAATGTAACGGTCTTTCCCAGACTTGTGTACAGGAAACACTAAGGCTGCTTCAGACTCCTTTAGAACACACGTCTACACACACGATGCAGTCTGTAAGGGCTTTTAGTAGAGGTGAACAGGTTTGGAGCCCGAGCTGTTTGCTAAGCTGAAGTCATAGGTTGTGAAGTAATTT	248	284
NM_057203.1	Rattus norvegicus C-C motif chemokine ligand 22 (Ccl22), mRNA	1770	AA	AA	AATATTATCCCTGCTGCAGGCCCTCTCCAGCACCACTCACCTCCCAGGCTTCCATCCGTCCCAGTCCCAAGCCCCATGCTTCAGACTTCCTTGGCCCCCACCTACACTCAGAATTCTGGGAGTCTCAGACTGGTCCACTAGGCCCCAAGGGAGGAGGTCCCCACAAGAGCTCCTCCTGTTTCTCGGTCTCCAGCACAGGAGTGGGCTCAGAATCAGATTTCTGAAAGGAGCTGCAAATTCTACCAGTAAAA	251	287
NM_001106699.1	Rattus norvegicus Beta-1,3-galactosyltransferase 6 (B3galt6), mRNA	2137	CC	CC	CCCAAGGGCATCTAGTTATGAATGTGGTGATTTCATCTGTACCACACACACACTCCCTGACCTGTGTGATGCCACCTATCAGCCATCTGGAGTGTGAGGGCAGGGACCTCCTCACTTGATGAGTTTATAGTGCCCCCATTCTGCACTCTGCAGCTCACTGCACATCTTGAATGTTCTGCACAGCCTGACCTGCAGACTGTGTTGAATTCATCTCAAAATGTTACTTGTTGAAGTTGTCTTTGTATAGTTTGGACAAAATTCCAGTCTGTTGCATCTCCTGTTTTCATCTTTTGTCATGGACAAGTCGGAGAGGTTTGGCTTGGTTTTCAAGTCAACTAGCTTAGAACTTTTGTCTCTGTGGATAGAGTTTGGTAAATATAATGCAGTTTGCTTAGAACC…	523	559
NM_001130551.1	Rattus norvegicus secreted Ly6/Plaur domain containing 2 (Slurp2), mRNA	548	TC	AC	TCTCCCATCAGCTTTACAGACCTGCCTCTGGTGACGAAGATGTGCTACAATACCTGTCCTGATGTCCCCAGCTTGGGCTTGGGCCCTCATGTTTCCATCGTTTGCTGCCAGTCTAATCTCTGCAACAGGGACTGACACACTCCTCCGCTACCAGCTGGCTCCACAGAGCCATGCCATCCATGTCCTTTGGTCAGGCCTGGTCCTTGGAGATCATTCCACCTTGATCATCCCAAAGCCCGCGGGTTCATACTTCCTCAGGAAGTTCTGAATGGAGTCCTGTGTAAATCTGCTGTGGTACAAAC	302	338
NM_001106252.1	Rattus norvegicus kallikrein related-peptidase 11 (Klk11), mRNA	1260	GG	TT	GGAACATCACGGACACCATGCTGTGTGCCAGTGTTCGGAAAGAGGGCAAGGACTCCTGTCAGGGTGACTCTGGAGGCCCCCTGGTCTGTAATGGATCTCTCCAAGGCATCATCTCCTGGGGTCAGGACCCATGTGCTGTCACCAGGAAGCCTGGTGTCTACACAAAAGTCTGCAAATACTTTGACTGGATCCACGAGGTTATGAGAAACAATTAGAAGGACCCTGCTTACCACCACCCAACCCCTCCAACCTCTTT	256	292
NM_057140.1	Rattus norvegicus protein phosphatase 2 scaffold subunit A alpha (Ppp2r1a), mRNA	2234				0	-
NM_133424.2	Rattus norvegicus actinin alpha 3 (Actn3), mRNA	2904				0	-
NM_199508.1	Rattus norvegicus protocadherin alpha 9 (Pcdha9), mRNA	5239	AA	TT	AATATCAGCTCATAGAAAGTAATAAAATTTGCTGTTACCATAAATAAGACATT	53	89
NM_001106541.1	Rattus norvegicus WAP four-disulfide core domain 3 (Wfdc3), mRNA	915	AC	CT	ACAGATGGCT	10	46
NM_001013142.1	Rattus norvegicus CKLF-like MARVEL transmembrane domain containing 2A (Cmtm2a), mRNA	982	TA	AC	TACATTACCTTCATCTTCTGGCCTATGACAGATCTATTGAACAGCCTGTTCTCCTGTGTGTTCCTCGCAGGCTCTGTATTCTTTGCTTTCAAGGCTAGACGAACATTGCCAAAGCCCTAC	120	156
NM_001107977.1	Rattus norvegicus hes-related family bHLH transcription factor with YRPW motif-like (Heyl), mRNA	4658	GT	AC	GTAGGTATTTCTGGCTAGGTAGGAAGTGGGAGAGGGCCTGGAAGGAAGCCCTCCCAGAGGAGGGCCAGGGGACTCCCTTTTACAGATCTAGAGGCTGACCCAGGTTCTGAACACATGTGGAAGAAGGGCTAGCCTGAGCTCTGAAACTAATCTTCTTTATTACACGCTTGCTAATGAGGAATCATTTTCTTCAAGTTCTTTGTCCTTCTTGAAC	214	250
NM_001106724.1	Rattus norvegicus anterior gradient 3, protein disulphide isomerase family member (Agr3), mRNA	1069				0	-
NM_001108426.2	Rattus norvegicus kinesin family member 20A (Kif20a), mRNA	2949	AC	TC	ACACCTACCTGCCAAAGCTCGACAGACAGCAGCCCTTACGCACGGATCTTGCGCTCACGGCATTCTCCTTTACTCAAATCTCCCTTTGGCAAAAAATACTAAAGTTGTGGGGATGAAGATGCATGGTTGTTGCCCTGCGGTTGCTCAGCTGCTAGGTCGGTCTCTTAGGCTTGAGCATGTACTCAGACTGTATTCAGAATGACTGTATTATATTCACCTATGCAATCTTGTTC	233	269
NM_001106001.1	Rattus norvegicus enamelin (Enam), mRNA	4247	AA	AT	AAGTTGCCATGCTTTGGTTCCAAATTAGCAAAACTTCACTCTTCTAGCACTGGACCTCCAACTAACAATGGAGGGCCAAGCCTACCTAATGGTGCTCTCTCCACACCCACCGAAAGTCCTGACACATTGGTTGGGTTAGCTACTAGGGAACAAT	154	190
NM_001008330.1	Rattus norvegicus RNA polymerase I and III subunit C (Polr1c), mRNA	1320	TG	TG	TG	2	38
NM_001107674.1	Rattus norvegicus N(alpha)-acetyltransferase 15, NatA auxiliary subunit (Naa15), mRNA	6018	TC	AT	TCTTCAATACCTTGAGGTCTTTATACAGAGATAAAGAGAAGGTGGCAATTGTAGAAGAACTAGTAGTTGGTTATGAAACTTCTCTAAAAAGCTGTCGCCTAT	102	138
NM_001108707.1	Rattus norvegicus RNA polymerase I subunit F (Polr1f), mRNA	3557	GA	TC	GATTCTGCCTTGCCTGGAACTACCGAGCTATGCCGCGGCGTGTGCGCTGGTAAGCAGCCGCTATTCCTGCTTGGTGGCCGCCCCGCACCGCAGGCACATCGCCTTGTCGCCCCGCTACCTGAGCAGGAAGCGCACGGGCATCCGCGAGCAGCTGGACGCCGAACTCCTGCGCTACTCCGAGAGCCTTTTAGGTGTTCCCATTGCATATGATAACATCAGAGTTGTGGGTGAACTGGGAGATATTTATGATGATCAAGGACACATTCATC	269	305
NM_001012089.1	Rattus norvegicus dual specificity phosphatase 2 (Dusp2), mRNA	1656	GT	TG	GTGCTGGTGCACTGCCAAGCTGGTATCTCTCGCTCAGCCACCATCTGCCTGGCATACCTGATTCAGAGCCATCGAGTACGGCTGGATGAGGCCTTTGACTTTG	103	139
NM_001106800.1	Rattus norvegicus matrix metallopeptidase 20 (Mmp20), mRNA	3284	AC	TT	ACATTATGGACTAAGTGGTGTGTCAGAGACGTTCTTCTCCAGCCTTCAGTCCTGAGGGTGATTGAAGGGTCCTTGAAAATAATAACAACTCTATTGTTTTTCCTAATATTCATTCACAATT	121	157
NM_001106538.1	Rattus norvegicus WAP four-disulfide core domain 5 (Wfdc5), mRNA	1144	GA	AC	GACTGCCGAGACCCCAGCAAAGGCTAATTCTGCCTTAGGATCTGTGACTCTGCATCCCAGGTGTGGTTCCCACCAGGAAGAGATCATGATGTGGGGGCCAGGGATCCTGCAACCCAGATCATCTCTCCAGAGACAGTTGTAGCCTTCTGACAAACACTGGTCCGTTGTCACCTCCCTTACTCATGTCTCCTGCTTCTCTTCTGAGTGCCAAGGTTCACACCAACATCAAAAGCACAGCTCATCGCTCCAGCTCCCCACCCCACTGTCGTGCTGAGCTTCCCACCCTACCTCACAGCCATTTTTATATCTCTCTGTTCATTGTTTCCTCCAC	331	367
NM_001106552.1	Rattus norvegicus Sp5 transcription factor (Sp5), mRNA	2121	CC	AA	CCCTAGAGCGGAGGGCAGGGCAGGCAGGGCTGGAAACTAGGTCATAGTTGAGAACCCCGACTTACCCCAGGAGGATTCCAAAGTCGGAGCCATCCCTGCCTGGGAGACTTACATTAGGGGATTCTACCCAGGGCTGGCTTTGCTTGTGGGAGCCGCTGCTGAAA	164	200
NM_001014773.1	Rattus norvegicus protocadherin gamma subfamily A, 7 (Pcdhga7), mRNA	4761	TT	GG		0	-
NM_001106845.1	Rattus norvegicus ankyrin repeat domain 34C (Ankrd34c), mRNA	2480	GT	TA	GTGTAAGCTCACTTCTGAGTCAAACCCAACGGTCATTTCAGAGTGTCATTTCTGAGATGACCCCTGGGTGTTGCTGCTGTTGCTCTTGTTGTGCATA	97	133
NM_001108886.1	Rattus norvegicus RNA polymerase II subunit D (Polr2d), mRNA	1115	GA	TG	GACTATTAGACCATAATTACTGTGACTATTAGACCATAATTACCATCTCCTCTCATTGCAGCCTTATAAGGGCTGCTATGGTCAAATGTGCTGCCATCCTGAACTAGGGAGGTAGACCGATG	122	158
NM_001108987.1	Rattus norvegicus DIRAS family GTPase 1 (Diras1), mRNA	1897				0	-
NM_001007735.1	Rattus norvegicus SERTA domain containing 1 (Sertad1), mRNA	1260	CC	AA	CCTCTCAGCCTCCATGGCCAGCCTCCTGGAAGATCTCAGTCATATTGAGGACCTGAACCAGGTCCCCCAACCCCAAGCAGACGAGGGGCCTCCAGGCCGCTCTGTCGGGGGTGTCCTGCCCAACCTGGGTGCCTTGGACTTGCTAGGCCCAGCCACGGGCTGTCTGTTGGACGATGGACTGGAGGGTTTGTTTGAGGACATTGATACCTCCATGTATGACAGTGAACTTTGGTTACCAGCCTCTGAGGGTCTCAAACCTGTCCCTGAGAATGGCCCAGCCAAGGAGGAAACTCCAGAGTTGGATGAGGCTGAGCTGGACTACCTCATGGATGTACTAGTAGGCACACAGGCACTGGAACGGCCACCAGGACCTGGGCGCTGACCCTTAGACCCAGGGAT…	706	742
NM_198736.1	Rattus norvegicus potassium channel tetramerization domain containing 13 (Kctd13), mRNA	1716	CT	TG	CTCTGCTGGCCAAGTCGTGGGTCTTCCCTCTATCCCCTCATTGCATGATATGTTCAGTGAGCCCTCTCCAGTCATTGCCACTCACTGCTAACCACACGGTACATTCCAGCATTACCCTCTGGTGGGGCTCTTCAGAAAGCCAGTGTCCACCCTCCTCCACAACCTCGTTCTGCCATCTTTCTCTTACCATCTGGTTTAGAATGAGGCAGGATTCCCTTTCCCATTTG	227	263
NM_001105920.1	Rattus norvegicus alkB homolog 4, lysine demethylase (Alkbh4), mRNA	1803				0	-
NM_001107968.2	Rattus norvegicus zinc finger protein 691 (Zfp691), mRNA	1483				0	-
NM_001100750.1	Rattus norvegicus succinate-CoA ligase GDP-forming subunit beta (Suclg2), mRNA; nuclear gene for mitochondrial product	2263	TC	CT	TCCCATAATGGCCCTGTGTTAGTAGGCAGTCCCCAGGGGGGCGTCGATATTGAAGAAGTGGCAGCTTCCAGTCCAGAACTCATCT	85	121
NM_001107235.1	Rattus norvegicus splicing factor 3A subunit 1 (Sf3a1), mRNA	5019	AG	AC	AGTTCACAGTTCCCAGAATTCCTGAATGAATGCCTGCTCTGCCTCACTTTGACTTGGAGGCTCATTGACCACAGAGCCTTGTGACCTTTGGTGGCCACAGACCAAGATTGTTTTCTAGCACGGCATATCCTACAGCCTTGTAAGTTTGAACAGTGCTTATCCAAAC	166	202
NM_001109022.1	Rattus norvegicus indolethylamine N-methyltransferase (Inmt), mRNA	1062	CA	CA	CAGAGAATTGCCTTCCCTGAGGAAGTTATAGCAATCATTTGTAAAGCCTTGCTCCATAGCCTCCTAACACTGACCATGTTGCTTCTCTCTATAACCTGGTCACCAGTTCACAAGGGAAAACTCAAGGTTCAGCACCAAAATCCATCCCCCTTACTCCTTTTGTACCCTGATCAAAGCTCA	180	216
NM_001106582.1	Rattus norvegicus G protein-coupled receptor 165 (Gpr165), mRNA	3156	AT	GT	ATTACTCCCATGCAAGGCAATGTCTGCATCATCATCATCTGGATTGTGAGCACTTGTGCTGCTTTGCCACATGCCGTTTACCAGAAGCTTTACCAAGTGGAATTTGGCAACACAACAGAGGAATCTGCCTGCCTCCCAAGTTTCCCATATACTTCTAAGTCCACATGGAAATACCTTGACCTGGGCACCTTTCTGCTGTTCTTCATCTTGCCTTTGCTGGTGCTGGTGGCTGTCTATGGTCATGTGGCCAAAAAGCTGTGGATCCATGATGCTGTTGATGACATCAATATCCACACTTACATCTGCCAGCGTGGGAAGAAGAAGCAGACCCTAAAGATGCTGATGACAGTGGTGCTTCTGTATACAATCAGCTGGCTCCCCCTCAACCTCTACCTGGTG…	752	788
NM_001108357.1	Rattus norvegicus MOB kinase activator 1B (Mob1b), mRNA	2704	TG	TT	TGATGTCAGCTGGACCAAAATATGAGTATCACTGGGCAGATGGAACAAACATAAAAAAGCCCATCAAGTGTTCTGCACCGAAGTATATTGATTACCTGATGACATGGGTTCAGGACCAGCTGGATGATGAGACATTATTTCCATCAAAAATTGGTGTTCCATTCCCCAAGAATTTCATGTCAGTGGCAAAAACCATACTCAAACGACTCTTCAGAGTCTACGCTCACATTTATCATCAACATTTTGACCCCGTGATCCAGCTTCAGGAGGAAGCACATCTCAATACATCTTTCAAGCACTTTATTTTTTTTGTTCAGGAGTTCAACCTTATTGACAGACGAGAGTTGGCACCACTGCAAGAGCTGATTGAAAAACTCACCTCAAAGGACAGATAGAGGA…	776	812
NM_053706.1	Rattus norvegicus doublesex and mab-3 related transcription factor 1 (Dmrt1), mRNA	1415	AT	TG	ATGCACTCATACTATGGGCCTCCCTCCTACCTGGGTCAGAGCATGTCCCAGATCTTTACCTTTGAGGAAGGCCCCTCCTACTCAGAAGCCAAAGCAAGTGTGTTCTCGCCGCCCAGCAGTCAAGATTCTGGCTTGGTTTCCCTCTCCAGCAGCTCTCCGATGAGCAACGAGAGCACGAAGGGAGTTCTGGAATGCGAGTCTGCGTCCTCTGAACCTAGCAGCTACGCGGTCAACCAGGTCCTGGAAGAGGATGAGGACGAGTGAGCCGCGGGGGCGAGCCTCGGGGGCGACTCAGTTCACAGGGTATTAGGAGGCTTGTTTTG	323	359
NM_001106883.1	Rattus norvegicus apolipoprotein B mRNA editing enzyme catalytic subunit 2 (Apobec2), mRNA	1198	GA	TT	GACATGCCTGGCTTCCTGATTCTACTTGGAGTTGGACATCTGATACCTACCATTACCTCCCCTCAGAGAACTCAAAACACATCTCAGGCCATCATTCATTCAGCCATGCCTTCCAACATGGCTCTTGGAAGAAAGGAAAATGAAGACAAGAAAAACGTGTGATGTGGGCAGCAGGTACCTGGGGGTGGAGGGTCTTGTTGCCTCTCCAGGGGTGCTGCCTGAGACAGAGATTCATAGTCAAGGTTTGACCTCAAAATACATCTAGAAAAGTGTTTTGAATTGAGCTGGCTTT	292	328
NM_001108860.1	Rattus norvegicus trans-2,3-enoyl-CoA reductase-like (Tecrl), mRNA	1394				0	-
NM_001013222.1	Rattus norvegicus Rho family GTPase 1 (Rnd1), mRNA	1639	GC	GT	GCCCAAGGGAGAAGCCCCAGACCCCCTTCTTTTGCAGAATGTGGGGGTGGTGGTGCTGCAGGGGCAGGACTGATGGGGGGGGGGTCGTCACCAGACTTTCCTGCCCTCAGGGCAGTACAGCTGGGATTTGTTTTATAGACTCTTGTTTTTGGAACTGGGGGGGTGGAGGGGGAGCGCTTCGATCCGTTATATGTTCTGTGT	201	237
NM_001025155.2	Rattus norvegicus leucine rich repeat containing 17 (Lrrc17), mRNA	2071	AG	TC	AGGGTTATCCAGGAGCTTCCTCTGATTCTTAGGTTGTGGCGATTTCAATGATCTAGGGAGACCTGCTCAGCTGTGGGTCAGACTCCCGTTTGAGGAGCACACGGTGGGCCAGGACTGGTGGTATATGTCCACAACCCCAACAGTAAAGCTGAGGCAGGAGGATCACGATGCCAACCTGGGCTACGAAGCCAGAAACAGTCTCAAAATAGCCAAACTATTCCACACTGGTGACTTGAGGGAGTTGGTTC	248	284
NM_001108344.2	Rattus norvegicus ubiquitin-conjugating enzyme E2T (Ube2t), mRNA	989	GT	AT	GTTGCTGAGGAGTGCCGTGGGAGCCACCCGAGGGGACGTACCCGAGGTCACGTACACCCCACCAGCCCTTAGTGTGGAGCAGGGAACTGTTTATGGTTCCTTTCACTTGAAACCATGCAGAGAGCTTCACGCCTGAAGAAAGAACTGCACATGCTAGCCATCGAACCTCCCCCAGGCGTCACGTGCTGGCAGGAAAAGGACAAAATGGATAATTTGCGAGCTCAAATACTAGGTGGAGCCAATACACCTTATGAGAAAGGTATTTTCACACTGGAAGTTATCGTTCCTGAAAGGTACCCATTTGAGCCACCACAGATCCGATTTCTGACTCCAATCTATCATCCAAACATTGATTCTAGTGGAAGGATTTGTCTAGATATTCTCAAATTGCCACCAAAG…	508	544
NM_001025769.1	Rattus norvegicus spermatogenesis associated 25 (Spata25), mRNA	1608	GC	CA	GCAGCTCAAGCCTTCATGATGGCCCATCCAGAGCCAGAGGGGGCTGTGGAGGGGATGCAGTGGGAGCAGGCGCATGCCCACATGGCTTCTGGACAGATGCCTTTAGTGAGATCCAGGAGGGGCTCCTGCTTGTAGTCAGATGAAATAGCATGAGACACAGGGCGGCTTCTCCGTATGGTTTTTGGGCAGATGAGGTTGGGAATGGCTCTCTCTGGCTGCGATGGGAAGAGGGTGTGGGTAACTGAGCCACCCTGACAGACTGCACGGCTGGGTTAGGACCACTCTGCAGGAAGTTCTTCGTGCCACCACAGATCTGAGCAGATAAGGTACCTACCTAGGAAGCCCTGTTGGGAGAGTAGAGAAAATTTTCTGTCTAAAGTCCTAGACAATGTGGATTTT…	676	712
NM_001109551.1	Rattus norvegicus mesogenin 1 (Msgn1), mRNA	641				0	-
NM_001108098.1	Rattus norvegicus carboxypeptidase M (Cpm), mRNA	5450	AT	AA	ATCCTCAAGACTTCTGTTGCCCTCTGCCAGGTAGAGAAAGCACAGGAGTACTTGGGTTGGTAACTATTTTGAAGGCGGTAGGTATACCTAA	91	127
NM_001106057.1	Rattus norvegicus SLIT and NTRK-like family, member 6 (Slitrk6), mRNA	4248	CA	TC	CACATATTTTTTTAGGTATTCCTCTAACTAGAGTAAATC	39	75
NM_001107692.1	Rattus norvegicus ephrin A4 (Efna4), mRNA	1199				0	-
NM_030833.1	Rattus norvegicus interferon induced transmembrane protein 2 (Ifitm2), mRNA	630				0	-
NM_001115032.1	Rattus norvegicus tetraspanin 15 (Tspan15), mRNA	1646	GG	TT	GGAACAGGGATGGCCCAGCCACAGTTCTGAGCCCCAGAGAAGGAAGCTCGGGGCTCAGTGTGGGCTCTTTTTATTTCTGGCAGTGCCTTGGCCAGTGGTCATGTTGCCCCTTCGAGGGCAGTTTTGCAGTGATTTTTTTTT	141	177
NM_001109288.1	Rattus norvegicus gametocyte specific factor 2 (Gtsf2), mRNA	720				0	-
NM_001109623.1	Rattus norvegicus sperm acrosome associated 4 (Spaca4), mRNA	674	GG	CA	GGCCTGTTGCTGCTGCTTCAATACTGGCCGTAATCCACAGGAACTGCAGGGCCTGGGGCTGTGCCCCGTGGCCCTATCTCCATCCCTTTTCCCCA	95	131
NM_001011961.1	Rattus norvegicus src-related kinase lacking C-terminal regulatory tyrosine and N-terminal myristylation sites (Srms), mRNA	2241	GA	GA	GAGATGCTATACAACTGAGAATGACAGCAGCCTCTGGGCTCCCACACTGGGGCTCCTTCACTGACACAGTCTGGTACTCACATGTGCACACTAGAGAGACACATGTACCTACATGTGCACACCAGACGGACTCGTGCAGACTGAGCCTGGTCATGAGCACTCACTCAGATATGAAGGTCGATGTGCTCCTCCTGGCATAGTCCCCAAAGTGTTGATAAAGTATAGAAGAGGAGCCGCACGGACGTGCTGGACAGACAAGTACCCACAGAGCCAGCAGTTTCCTCCTTGCCCTCAACGCTGCTCCCTTCTAGAATCAAGGATGAAAAGCCCACTTTCCCCAGGTCTTACTGTGGA	354	390
NM_001106760.1	Rattus norvegicus nudix hydrolase 14 (Nudt14), mRNA	816				0	-
NM_001109455.1	Rattus norvegicus NK6 homeobox 3 (Nkx6-3), mRNA	1881	GG	TT	GGGGAGGGGGTGGAAAAGAGGAAGGAAGTGGAAAGAGGAGGAGGAAGCGAGAGGGAAGGAAGGGAAGGAGGAGAGGAATGGCGAGTGCCCCGAGAGAGGAGACGGCGCATCTCTCTGCCATTCCTCCCTCTGGGCCCCTTGCCCAGTCGGCCCTGCTCAGCAGGGAACCTGGCTATGGAACTCTCCAGATCCCCTAAGGACCAGCAGATTAGGGAGTCACACAAGGCACTGCGCCCAGTCGTAGGCTGGGACTGCAAAGCAAAAGGTGGAGGCCGAGGTCCAGGTGTGCTTCCCAGTGATCCCACTGCTGGGGACAGGAGGAAATCCACCTCTGCGAGGGGAGCGGGTCCTGAAAACAGCAATTCTTCAAACCCCGAGTTTCAGGACCCTGGGACCCCC…	654	690
NM_001008721.1	Rattus norvegicus EBNA1 binding protein 2 (Ebna1bp2), mRNA	1135	AA	TT	AAAACGTACCAGACAGAAACTGAAAAGCAAAACCCGCTGAACAGCACTGTCCTGTGTAAAGAACCAGGAGAAGGATGCACAGCACACTCAGTGTTCGTCCTGATTTTTGTAGGAAATTATT	121	157
NM_001012215.1	Rattus norvegicus protocadherin gamma subfamily B, 7 (Pcdhgb7), mRNA	4748	TT	GG		0	-
NM_001109556.1	Rattus norvegicus mitochondria-localized glutamic acid-rich protein (Mgarp), mRNA	1206	AG	CC	AGGTGGAGGGTGCAGCGCCAGACCAGGCCGACGTTTGCAGTGAGGGGGTTGATGATAACAGCAAGGAGGGGGCTGAGACCAGCAAGGAGGGGGCTGAGACCAGCAAAGAGGAGGCTGAGACCAGCAAGGAAGCTGAAGGTACCACTACTGCGGACGCGGAAGAGGAGGAGAGTGCGGAGAATGCCGAACTAGAAGAAAGCCCTCCC	206	242
NM_001109211.1	Rattus norvegicus basic helix-loop-helix family, member e23 (Bhlhe23), mRNA	2215	TG	AT	TGAGTACTCGGCGCTGGACTGCATGGGAACTAGTCGCTCACAAAATCGGACCGCAGCGCAGAATCCTGCCTCTGTACCTAGTCTGAGCCTTAGCCTGCGAGCCCCAGATGTTGCCTGGTTTTCGCTCTGTGGCCCTCAGCAGCTTCCGCCTCCAT	155	191
NM_001109560.1	Rattus norvegicus transmembrane protein 52B (Tmem52b), mRNA	1247				0	-
NM_001107137.1	Rattus norvegicus tRNA-yW synthesizing protein 1 homolog (Tyw1), mRNA	2617	TT	CT	TTGTTGAGCTTGTCTGAGCTAAGGATCTTCAAAGACAGAAGGTCCTCGTTGCCATCGCTGCCCACAGGGCACAGTTTCACAGCCGTGTTTTACAGTCTGACACCAGCAGGCAGCCGTGCTGCCCACACAGCACCCATACACAGGGCTGGGGACTCCATGCTTCTTACCAGAACTCAGGCCCT	182	218
NM_001109643.2	Rattus norvegicus small nuclear RNA activating complex, polypeptide 5 (Snapc5), mRNA	1213	TT	GG	TTTACTCAGAGACCCCGTCTGGAGAGCAGTGGTGGTGCTCATAGAGGCACACATCTCAATCCCAGCACATATGTATGGAAAGGG	84	120
NM_001106394.1	Rattus norvegicus nodal growth differentiation factor (Nodal), mRNA	2034	GG	GC	GGAGCAGAAGTGGAAGAGCTCTGCCTGCTGGAGCTATAGGAGAAGGCCCCGCCCCCTGTGCATACAGGGCTCTTAGACCCAACAAGCCAGAGGCTACTGTGGGAAGGCAGGATTGGGAAGCCTTGCAAGGGCTGGCTGGGCTCCCTGGAAACAGAGTTTATGAACTGC	168	204
NM_001126084.1	Rattus norvegicus metallothionein 4 (Mt4), mRNA	384				0	-
NM_001006993.1	Rattus norvegicus sarcoglycan, gamma (Sgcg), mRNA	1523	AG	GA	AGAGACCACAGCTGTGTCCCACAGCTGGATTGGAGCTGGACTCACTGCCAAAACACTTAGAAGCGCGCAGGGGAGCGTGCCCACGGGACTGTTGGGCCGAAGTCTACCTGGTTTTAGAACGATCCAAAGAAATGGCAGGAATGCATTCACTGTATTCCTCTTTCTAGCCCTGCTCCAGATCTCTCACAATGAACTGCTACCCGCAAACAATTTATAGTACTCAATGGCAGACATCTGTCTCCTCCCAAACGAACGGTTGGCTGGAGGACTCTAACATGCCCCAACTGTGCACACCTCCTCCTTTAGA	307	343
NM_001109502.1	Rattus norvegicus similar to human chromosome 6 open reading frame 141 (C9h6orf141), mRNA	1305	AA	CT	AATGCCTGGCCGACACCTCTCT	22	58
NM_173326.1	Rattus norvegicus peptide HP (rs14) (LOC286992), mRNA	839	CA	TG	CACTGGCGCGACTGGTCTTCCAGCTTCAGCTACTAGCGATGGTAACACTATTTGTGGTTGTGATGCAGGATATTCTGGTGCTAATGGAACTGATAGTGCGCCAGGCTAAGTTACATGCACAGCATGTG	128	164
NM_001109293.1	Rattus norvegicus similar to human chromosome 11 open reading frame 71 (C8h11orf71), mRNA	415	AG	TC	AGACAGCTTCCTGGTTACTAGACTTGATCCGAATCAGCCAGGACCTCGGCCACCAGCGCGACCCAGCGTTCGGACCGACAGACGTCGAGTGCCCGTCGGTGGCCGCAGCCGTAGCCGAAGCCGCCAAGGCAGATTCTCGCCCTACCCGATCCCAGGCGTCAAACTCGACCTC	172	208
NM_001012130.1	Rattus norvegicus phosphoglycerate kinase 2 (Pgk2), mRNA	1590	TG	CA	TGACAAGTTTGATGAGCATGCTAAAGTTGGACAAGCCACTGTAGAATCTGGTATACCATCTGGCTGGATGGGTTTGGATTGCGGCCCTGAGAGCA	95	131
NM_001015020.1	Rattus norvegicus TGFB-induced factor homeobox 1 (Tgif1), mRNA	1410	GG	TA	GGGTGATGGCAAGAGATGCATTATTTTATATATTTTCCTA	40	76
NM_001108037.1	Rattus norvegicus retinol dehydrogenase 12 (Rdh12), mRNA	1674				0	-
NM_001013101.1	Rattus norvegicus modulator of apoptosis 1 (Moap1), mRNA	1839	GA	AT	GACCAGGTGAGGAAGAATTTGAATCTTGGATGTTTCATACTTCCCAAGTAATGAAAACATGGCAGGTGTCAGATGTAGAGAAAAGAAGGCGGTTGATGGAGAGCCTTAGAGGCCCAGCATTCGAAATTATTCGAGTCCTCAAGATAAACAACCCGTTCATTACCGTTGCAGAATGCCTGAAGACGCTTGAGACAATATTTGGGATTATTGATAATCCTAGGGCCTTGCAGGTCAGATACCTTACTACTTACCAGAAGAGTGGTGAAAAGCTCTCTGCCTATGTTCTGAGGTTGGAGCCTTTATTACAGAAGCTGGTGCAGAAAGGAGCAATTGAGAAAGAAGTTGTGAATCAGGCCCGACTAGACCAAGTCATTGCTGGGGCAATCCACAAGTCAGTTC…	706	742
NM_001107995.1	Rattus norvegicus PHD finger protein 13 (Phf13), mRNA	3180	CG	TC	CGTTTCCAATGCTTGTTCTTTCTCAGCAGTGTTTGGCAGAGCCATGGGTGTGTTTCATACCCATCTATCACATGTGTTCTGTGTTAGACATGAGACAGCAGAGCGGCCAAGTGTGTCACCTTTCTTCCCCTTCCTGGAACACCTGCAGGGTCACCAGGCATC	162	198
NM_001109514.1	Rattus norvegicus peripheral myelin protein 2 (Pmp2), mRNA	1350	GG	CT	GGGCCTGGGCAGTTAGGAGCAGGGGAAATCATAAGGAAAACAAAGCAAGATCAGATACT	59	95
NM_001106546.1	Rattus norvegicus zinc finger protein 93 (Zfp93), mRNA	2098	GC	TC	GCAGCTTGGACCCCTGGTCTCTGTGGAGCAGCTGGAGAGCACTCTGGAGCCCAGCCATGACCTCTAGAGAAGCATGGGCAGTCTCTCAGGAATCTGAAAAACGTCGATGCCAGCCCTGCACGGTGACACCACAGGAGGACCTCGCCTTCTCTTCTAAAGCAGCCTCGACCTCCCCAGCCTCCAGCAATGGAGCGGCTAACCCACGAGGGCATAGGTGTCAAAGCAAGACCACGGGGACAATTGCCTACCCCCAGTTCCTTCTCTACGCGCATTCCCTTAGCACACTGTGGCCTCCTCCGCCATCCAAAGGTTGAGTCTACTAAGCACAACTCCACCTCCTCGGGGAAAGTCGCTGCCTCTGAGTTGAGACTGGGAAAGGGACTCGTCTCTGGAGGAGTT…	497	533
NM_031771.2	Rattus norvegicus thrombomodulin (Thbd), mRNA	3680	CT	TA	CTTCTACAGTGTTA	14	50
NM_001106462.1	Rattus norvegicus late endosomal/lysosomal adaptor, MAPK and MTOR activator 5 (Lamtor5), mRNA	879	GA	AG	GATTCAGTCATGCCTGTCTCAG	22	58
NM_001108031.1	Rattus norvegicus trans-L-3-hydroxyproline dehydratase (L3hypdh), mRNA	1837	CT	TT	CTCGGTGTTCACGGGCTGCGCTGTGAGGGAAGCAAAGTGTGGAGATTTCAAAGCCGTCATAGTGGAAGTTGCAGGACAAGCCCATTACACGGGGACAGCAAACCTGACAGTGGAAGACGATGACCCACTAAGGGATGGCTTTCTTCTCAAGTGACTTTTTTTTTTCATAAGTT	173	209
NM_001134754.1	Rattus norvegicus selenoprotein I (Selenoi), mRNA	2636	TC	GG	TCACCTTCAGATATTTTAGAAATGCACCCTAGAATATTCTACTTCATGGTCGGAACAGCTTTTGCCAATATCACATGTCAGCTAATCGTTTGCCAAATGAGCAGCACACGGTGCCCAACTTTGAACTGGTTGCTGCTTCCTCTCTTCTTGGTCGTGGCAACTGTGATCGTAGGCACAACAACCTCCCGCCTTGAGAGTGTTCTCCTTTACACACTCACTGCTGCCTTCACTCTGGCTCACATCCATTATGGAGTACAAGTGGTAAAGCAGCTGAGCCGACATTTTCAGATTTATCCTTTTTCATTGAGGAAACCAAACTCAGATTGACTAGGACTGGAAGAGAAGAGTATCGGTCCGTAATCTTGAGGAAGTACTGTAAATAGATGCGTGTAAATACTT…	563	599
NM_001100740.1	Rattus norvegicus metastasis associated 1 family, member 2 (Mta2), mRNA	3013	AC	TT	ACTTTCCTTATTGGAGTTTGAGGGCCCTAAGCTGGCATCAACCCCAGCCCATGCTCACTCTTCTTCCCTCCCCTTTCTCCCTCTGCCTTTTATATGCCAATTCTCAGAAATAAAGATCTTTTGTCTGTTTT	131	167
NM_001108880.1	Rattus norvegicus BARX homeobox 1 (Barx1), mRNA	1372				0	-
NM_001143911.1	Rattus norvegicus RNA polymerase II, I and III subunit L (Polr2l), mRNA	390				0	-
NM_001134606.1	Rattus norvegicus SPATA31 subfamily D member 1 (Spata31d1), mRNA	3862	TT	TC	TTATGTGAACAGAAAATTCTGGCTCAGAATTTCAGTGGAAAAGATTTCGTTCCCCAGAAATAATCCACCTC	71	107
NM_001127303.1	Rattus norvegicus ITPRIP like 2 (Itpripl2), mRNA	1926	AA	TA	AAGATGAACCATGAACACTGATTACACACCACTGACCAAATGCCCCTTTCCCACGGATGAGAGCACCGATGGCAGCTAAATAACAGATGAGCTGTCCCAGGTGTTGGAAAATTTGAAGGATGTCACAGGATTTGGTGGCACGAATGTTCTGTCCTAGGCTCCCTGGCCTAAGATAGCAGTGGCATCTTCTGCAGACCTAGTAGAGTATCCTGGGTGGTCTTATACACCGATCTCTCTGTCCCCCAAATTA	250	286
NM_199509.1	Rattus norvegicus protocadherin alpha subfamily C, 1 (Pcdhac1), mRNA	5292	AA	TT	AATATCAGCTCATAGAAAGTAATAAAATTTGCTGTTACCATAAATAAGACATT	53	89
NM_001034849.1	Rattus norvegicus GTPase, IMAP family member 1 (Gimap1), mRNA	1106	GG	CT	GGCACGCACTACTCCAATGAGGTGTACGAGCTGGTGCAGGCCACACGGTGCGCTGACCCCCAGGACCAACTCACCAAGGTGGCGGAGATGGTGGTCGCACGCATGCAGAGGCGGACCAGGTTCCTAGCTGGGCTGTGGAGATGGCAGAAATCCTACAGGCAGGGCTGGAGGGGTCTGATGATCTTCGTGGGTGCTGCCCTCTTGATCTGTCTGCTGTTCTACAGAAAGGTCCCAGGCCTTTGGGGACCAGAGTAACAGATAAAGCTGATCTTAGAAGATGCTATGACTAGGAAGATCT	298	334
NM_001135238.1	Rattus norvegicus twinfilin actin-binding protein 2 (Twf2), mRNA	1582	CC	TT	CCTGGGCTCTAAGGAACCGCTTCCTGTGGGACAGGAGGACAGGTGGCTGAGCACATTTGCTACTTCTGAGGGCCTCTGGACCAGCACTTCGTGACCTCGCCCTGTCACTGTTCCTGACTCTCCTCTGTGTGCACAGCCCCCCTGGTGCACACCTAGCCTCCAGACGATTTCATGCTATGGTTCCAGCCCAGTCCAAAAGCCGTTGGCTACAGAGGGTGGGGACAGTTGGCAGGGGCCAGATATCACAGGAAGGGTTGGTTGAATGCTGTATTTTGTAAAGAATAAAATATTT	292	328
NM_001127573.2	Rattus norvegicus ubiquitin-conjugating enzyme E2R 2 (Ube2r2), mRNA	1347	AT	TA	ATCACCCTGGTGGATGAGTCCGACCTCTACAACTGGGAGGTGGCCATCTTCGGACCCCCTAACACCCTCTACGAAGGCGGCTACTTCAAGGCACATA	97	133
NM_001107944.1	Rattus norvegicus kelch-like family member 9 (Klhl9), mRNA	4185	GA	TT	GATT	4	40
NM_001024316.1	Rattus norvegicus GATA binding protein 5 (Gata5), mRNA	2110				0	-
NM_001109145.1	Rattus norvegicus dickkopf like acrosomal protein 1 (Dkkl1), mRNA	1140				0	-
NM_001109500.1	Rattus norvegicus late cornified envelope 1M (Lce1m), mRNA	829				0	-
NM_001107816.1	Rattus norvegicus torsin family 4, member A (Tor4a), mRNA	3010				0	-
NM_001106037.1	Rattus norvegicus fat storage-inducing transmembrane protein 1 (Fitm1), mRNA	920				0	-
NM_001134716.1	Rattus norvegicus C-type lectin domain family 12, member A (Clec12a), mRNA	1441	CG	AA	CGGCTCATTTGTTTGATTATGTGGTCCTCAGTTGCTGGAACTGTTTCAGAAGCATGGGAAGGTGTGACCTTGTTTGAGGAGGTGCATCACTGAGGATGGGCTTTGAGTTTTCAAAAGCTCCTGCCATTCCCAGTTAGTTCTGTCTCTGTCTGTGTTTGTGAATTGAGCTGTGAGCTCACAGCTACTCTTCAAGGCCGTGTTTGCCTGCCTGCTGCCATCCTCCTCACCACAATGGTCATAGACTCTAACCCTCTGGAACCAGGAGCCAAA	270	306
NM_001109044.1	Rattus norvegicus COP9 signalosome subunit 9 (Cops9), mRNA	486	GG	GT	GGACAGGATCACCTGATGGTAGACACGTGTGACTATCACTAGGTATCAAGACCTAGTCAGCCAATAGGGGAACTGCCTGAACCAACTGGGTACTGATGCCTCTGGGAACGCCAGCCCCATGTCCTTGT	128	164
NM_001108901.1	Rattus norvegicus sterile alpha motif domain containing 5 (Samd5), mRNA	2490	CA	AC	CATCCTAGAGTAC	13	49
NM_001025130.1	Rattus norvegicus BAG cochaperone 4 (Bag4), mRNA	2266	AT	GT	ATCTGAGACAAGCAGGCTGTTTTGTAAGCATCTGGACTGTCACATTTTTGTGCATTGTGACTGCATATACTTCATGTGTATATTATAGCCTAGACTCTTGGACCTCTGTTCTGTTTTCTTACCAGCAGGTCACAGATGTAATACTATTCTACTTCTTCGTACATTTTGTAGTAATATGT	179	215
NM_001037350.1	Rattus norvegicus cystatin S like 1 (Cyssl1), mRNA	1546				0	-
NM_001006997.1	Rattus norvegicus sphingomyelin phosphodiesterase 1 (Smpd1), mRNA	2334	GG	CT	GGGGCACGCCCAGCTGGAAGCGGCTCTACAGGGCTCGGGAAACCTATGGACTTCCAGATGCGATGCCTGCCTCCTGGCACAACCTGGTCTACCGCATGAGGGCTGATGAGCAGCTCTTCCAGACCTTCTGGTTTCTCTACCATAAGGGCCACCCACCTTCAGAGCCCTGCGGCACACCCTGCCGCCTGGCCACTCTGTGTGCCCAGCTCTCAGCACGTGCAGACAGCCCTGCTCTGTGTCGCCACTTGATGCCCAATGGGAGCCTCCCAGATGCCCATAGCTTGTGGTCACGGCCCCTGCTGTGCTAGTGTGGGAAAAGTTCACATATTAGCAAAGGGATGGATTCCTGAGTATCGCTGATCTACCTGAGGCAAAAGCTTTCGGGGAAGGAGCCAGCCA…	505	541
NM_001134730.1	Rattus norvegicus galectin-like (Lgalsl), mRNA	3534	TC	TT	TCAGCCAGGAGAGCTGTCTTGGAGGTCCAGGTATTTTT	38	74
NM_001107724.1	Rattus norvegicus translocation associated membrane protein 1-like 1 (Tram1l1), mRNA	2182	GA	TT	GACAAATCGGAATGGAAATGCTCTCTCTGGTAATGTCAATGTGTTGGCAGCTAAAATCGCTGTTCTGTCCTCGAGTTGCAGTATCCAGGTGTACATAACATGGACCTTGACGACCGTCTGGCTTCAGAGATGGTTAGAAGATGCGAATCTTCATGTCTGTGGGAGGAAGAGACGGTCCAGGTCGAGAAAAGGCACAGAAAATGGAGTGGAGAATCCAAATAGAATAGATTCTCCACCAAAGAAGAAAGAGAAAGCTCCTTAGCAGTTGCAAGCGAATTGATTCTTACCTCCAAGGGAATCCACTTCTTCTTATGTGGTGTCTCTGTGCTAGAGATTTTCTGTTCTTCAGAACGGGTCGTGCTTTTTGAATATTGCTAATGTATTGTCTAATGTGTTT	397	433
NM_001107301.1	Rattus norvegicus abhydrolase domain containing 8 (Abhd8), mRNA	1982				0	-
NM_001025053.2	Rattus norvegicus polypeptide N-acetylgalactosaminyltransferase 4 (Galnt4), mRNA	2560	AC	AT	ACAGCCGACGGCCGACCTAGCGTACAGATGAAAACTTGTGATGCCCTTGATAAAAACCAGATCTGGAGGTTCGAGAAATAGACAAGCAGAACAGCTTTCTGGGGCTGACTGTAGCCTCTGGAAAGTAACCCTGCCCAGTGATGATTGTACTTTTACCAGAAGTCACCTGGCAGCTGTCTGTAAGAACACTGGAAAGCCATGGTTCATCTGGGGATATCTCTCTGAAGCTGGGTACACAGAGCACTGCTGCTCAATATCTCAAAGTGCCTTCTTTGCTCTCGGGTTTTAT	289	325
NM_001024289.1	Rattus norvegicus protein tyrosine phosphatase, receptor type, C-associated protein (Ptprcap), mRNA	860	TC	CC	TCCTGCCCCAGCCTGACTCTCTTCCCATGCTGTCATGGTGAGATACAAACTGCCTTGGACCTTCATCATCAACCCTCACGTGAGCTCC	88	124
NM_001012075.1	Rattus norvegicus TSPY-like 4 (Tspyl4), mRNA	2010	TA	TG	TAGTTTCAAGGTTGTGGCTTCCAAGTCTTTGCTCTTCTTTCTCTTGGCCATCACGATGTCCTGCATAGTG	70	106
NM_001109297.1	Rattus norvegicus tumor suppressor 2, mitochondrial calcium regulator (Tusc2), mRNA	2060	CC	TG	CCCCTGGCCTGTAGGGGCTCTACCCAAGTGGGAACTTCCTTTCCCTCATTCCCTTACCTGTAGTCAGAGCATTTCAGCCGTTTGCTACCTCGATTCCTCCTGTATTGGACAGACTGGAGACATGTACCAGCCTCCTCCTTCCTGCCTACCTGCCACGTGCTCCCACTCTAAGACGGACACTTTGCTGGCTG	191	227
NM_001107576.1	Rattus norvegicus integrator complex subunit 5 (Ints5), mRNA	3274	GA	GG	GACTTTTCCAGGGAGGGTGGAGGTGAAGGAGGACCCCATCTGTCTGTGCTGCACAGTGTCCTCCACCGCAACATCGATCGCCTGGGGCTCTTCTCTGGCCGTTTTCAGGCACCTCCACCATCTACTCTGCTTCGGCAGGGGACTTGACCTTTTCTCTACAAGTTGTGCGAGG	172	208
NM_001109651.1	Rattus norvegicus family with sequence similarity 241 member A (Fam241a), mRNA	715	GG	AT	GGCGAGCCCGCTGCGCGGGCGGCCGCAGGACGAGGGCGAGCAGGATGCTGAAGAACCACAAAACCACTCTGGCGAACCCATTGGAGATGACTACAAAAAGATGGGAACGCTTTTTGGTGAACTGAACAAAAACCTCCTCAACATGGGCTTCACAAGGATGTATTTTGGAGAACGGATTGTGGAACCAGTAGTGGTCATTTTCTTTTGGCTTATGCTATGGTTCCTGGGCCTGCAAGCCCTTGGACTGGTTGCTGTTCTTTGCCTTGTCATTATTTATGTACAGCAGTAAAACACTGGACATTTGGTAGCCATGTATGTAACCGATAGAGCTATCTACTTGGGCTTTTTGAAAGCCAAAGTAGTTTGACATATTTCATATTGTGTCCTGGCTATTTGTAAT	400	436
NM_001108855.1	Rattus norvegicus solute carrier family 41 member 1 (Slc41a1), mRNA	4650	GT	TC	GTTGCACCTGTCGCATGTACTTTTGGCCTGACTGGAAGAAACAAAATTGGTTTACTTTCACATCCCTCAAAAGCTACAGAACTGTGTC	88	124
NM_001108758.1	Rattus norvegicus prostate and testis expressed 7 (Pate7), mRNA	404				0	-
NM_001108661.1	Rattus norvegicus C-C motif chemokine ligand 19 (Ccl19), mRNA	715				0	-
NM_134391.1	Rattus norvegicus defensin beta 22 (Defb22), mRNA	653				0	-
NM_001109378.1	Rattus norvegicus meiotic double-stranded break formation protein 4 (Mei4), mRNA	2830	TT	GC	TTGACAATGCCCCCTTATGTTCATGTATTATATCTTATTTCACTCAATAGTCTAGCTCTATTCTCTAACATGGCCCATCTCATAAAACACAATAAATTGCCAATGATTTCCATCTGATATAAATTTCATTACAAGTTGTAATGAAATAAAGC	152	188
NM_001139465.2	Rattus norvegicus transmembrane protein 59 (Tmem59), mRNA	1513	AA	AT	AAATGGCCTCCAAACTGTACTCTGAATTATAGCAGAAAATGTTAT	45	81
NM_001108844.1	Rattus norvegicus MAP6 domain containing 1 (Map6d1), mRNA	1331				0	-
NM_001109592.1	Rattus norvegicus ring finger protein 186 (Rnf186), mRNA	1225				0	-
NM_001111127.1	Rattus norvegicus histone cluster 3, H2ba (Hist3h2ba), mRNA	630	CA	CA	CATCTCGTCCAAGGCCATGGGCATCATGAACTCGTTCGTCAACGACATCTTCGAGCGCATCGCCAGCGAGGCCTCCCGCCTGGCTCATTACAACAAGCGCTCGACCATCACGTCCCGCGAGGTGCAGACGGCCGTGCGCCTGCTGCTGCCTGGGGAGCTGGCCAAGCATGCCGTGTCGGAAGGCACCAAGGCAGTCACCAAGTACACCAGTTCCAAGTGAGGCGCGGCGAGAGCGCCCCCAACCCAAAGGCTCTTTTCAGAGCCACCTTCCAGGCTCAAAAAAGGAGCGTTCTGCCTAAGATTGTCATTCACCTGATGAACATTGGGATGGGGTGGAAGAGAGGGAGGGAGGGGTTGTACTGGACCGCGGGACCCTGAGATATAATACCTCTTGTTCAT…	408	444
NM_001134531.1	Rattus norvegicus zinc finger protein 949 (Zfp949), mRNA	3074	TC	CT	TCCGACGGTCGGCCTGGACAAGACTTTCATGGTTGCTGTATCCGAAGACTGAGCTAGGAGTGTCTGGATCTGTGGTTCCAACTGTCCAAAGGGCCATTACAGAAGCTCTGCCAAGGAGGTCGGTTGGTATCTGGATTGGACTCAACTGGCAAATGACTGTCTTTTCCCACTTCAGTGACAGATGAAGCTGACGTCATCAGAGCTTCGAGGCTGATAAGTTCCAGGTGTCCAGTCCCACGGCCAGTGGTTCCTGTGGAGTCTTTTCAAGGTTCTGTGTTCATCAAGTTGGCACAAAGGTTCCTTACAACATATCTCTGTCCACCAATTGTACAGTGTTTTGAGTGGAGAATCTAGGACCAAGCCATGAATATCCTCTCACTCTCATGACTCTAAGAGATT…	2591	2627
NM_001109463.1	Rattus norvegicus high-mobility group box 4 (Hmgb4), mRNA	683				0	-
NM_001037158.1	Rattus norvegicus protocadherin gamma subfamily A, 9 (Pcdhga9), mRNA	4732	TT	GG		0	-
NM_001109621.1	Rattus norvegicus tubulin polyglutamylase complex subunit 1 (Tpgs1), mRNA	1555				0	-
NM_001077434.1	Rattus norvegicus leucine rich repeat containing 52 (Lrrc52), mRNA	1446				0	-
NM_001107094.1	Rattus norvegicus homeo box D10 (Hoxd10), mRNA	1848	GA	CG	GAAAACCCAAGAGTACAATAACAACCCCGAAGGCAGCTCCACTGTCATGCTCCAGCTCAACCCTCGTGGCGCGGCCAAGCCGCAGCTCTCGGCTGCCCAGCTGCAGATGGAAAAGAAGATGAACGAAACCGCGAGCGGCCAGGAGCCCACTAAAGTCTCCCAAGTGGAGAGCCCCGAGGCCAAAGGCGGCCTTCCAGAAGAGAGGAGCTGCCTGGCTGAGGTCTCCGTGTCCAGCCCCGAAGTGCAGGAGAAGGAAAGCAAAGAGGAAATCAAGTCTGATACTCCAACCAGCAATTGGCTCACTGCAAAGAGTGGCAGAAAGAAGAGGTGCCCTTACACTAAACACCAAACGCTGGAATTAGAAAAAGAGTTCTTGTTCAATATGTACCTCACCCGCGA…	425	461
NM_001107250.1	Rattus norvegicus zinc finger protein 503 (Zfp503), mRNA	3101	TG	GG	TGAACATTGGTATTTATTTATGTTAGCTCCAAGCGGACCCGTGGTTCAAAAGTGCATTATTTAGTTTGAGCTCCGTAGG	79	115
NM_001024368.1	Rattus norvegicus solute carrier family 10, member 3 (Slc10a3), mRNA	1900				0	-
NM_001109266.1	Rattus norvegicus family with sequence similarity 229, member A (Fam229a), mRNA	806				0	-
NM_001109239.1	Rattus norvegicus pyroglutamylated RFamide peptide receptor like (Qrfprl), mRNA	3259	AC	TT	ACCTCGGACGGCCCCACGCGCGGTCAAGGCGCCTACCGAACCCAGCATGTCGTGGAACTTGACCGCGGAGCAGCTCTCGGCGCTGCTTCAGCTGCACAACCTGACGCGCGCGCAGTTCATCGCGCGCTATGGGCTGCGGCCACTGGTGCTCACCCCGCAGCTGCCTGCACGCGCCAGGCTGGCCCTCCTGCTTGCTGGCCTGCTCATCTTTGCCCTGGCGCTCTTCGGCAACGCCCTGGTAGTCTATGTAGTGACCCGCAGCAAGGCCATGCGCACCGTCACCAACATCTTCATCTGCTCCCTGGCACTCAGCGACCTGCTCATCGTTTTCTTCTGCATCCCTGTCACCATGCTCCAGAACGTCTCAGACACCTGGCTGGGGGGTGCCTTCATTTGCAA…	494	530
NM_001106799.1	Rattus norvegicus matrix metallopeptidase 27 (Mmp27), mRNA	1597	GG	TA	GGATGGGGAAGGGTTCAACTTGTTTCTCGTGGCTGCTCATGAATTTGGTCACTCTCTGGGGCTCTCCCACTCCAGTGATCAAACAGCCTTGATGTTTCCTAATTATGTCTCCCTGGATCCTAACAAATACCCACTTTCTCAGGATGATA	149	185
NM_001108857.1	Rattus norvegicus maelstrom spermatogenic transposon silencer (Mael), mRNA	1559	TG	TA	TGGCCCGCGTGGCAGACGCCATCCCCTACTGCTCGGCCGACTGGGCGCTCCTGAGGGAGGATGAGAAGGAGAAATACTCAGAAATGGCTCGAGAGTGGAGAGCAGCCCAGGGAAAGGATTCTGGGCCTTCAGAGAAGCAGAAACTCGTATCCACACCACTGAGGAGGCCAGGCATGCTTGTACCAAAACCAAGTGTTTCTCCCCCTGATATGTCAAATTTATCTATAAAAAGTGATCAAGCTCTCCTTGGAGGTGTTTTTTATTTTCTGAATATTTTTAGCCATGGTGAGCTACCTCCTCATTGTGAACAGCGCTTCCTCCCTTGTGAAATTGGCTGTGTCAAATATTCCCTCCAGGAAGGTATTATGGCAGATTTCCACAGCTTTATCAATCCAGGTG…	1284	1320
NM_001025125.2	Rattus norvegicus sulfatase modifying factor 2 (Sumf2), mRNA	1466	AT	TC	ATTCAGCCTCAGACAACCTGGGCTTCCGCTGCGCTTCCAGTGAAGGCAGGCTGAAGGAGGATCTGTGAGCGGCCAGACAGAGACGGAGAAAGCACCCCCTCAGTACTGTCTCTCCCTGACCAGATTCCAGAGGCAGCTGGACACCAAGCTCATCCGTCTGAGGGATGGCCTTTTGAGCCCCTCCCCTTTGACAGACAACCTCCTAAGGACAGAAGAACACTCAGACCCCAAGAAGGGACTGCCATCGCCTGGAAGATGACCAAGGCTGGGCGCTGGGTTGTCTC	284	320
NM_001109207.2	Rattus norvegicus GINS complex subunit 1 (Gins1), mRNA	1049	AC	TC	ACCTCCCCCTCCTTGGTC	18	54
NM_001040180.1	Rattus norvegicus tubulin folding cofactor B (Tbcb), mRNA	1107	CC	CA	CCCCATCCCTGACACAGCCCCTCTGAATGCCAGTGGCACCTTTCCTCTGAGATTTGTGCA	60	96
NM_001107591.1	Rattus norvegicus secreted frizzled-related protein 5 (Sfrp5), mRNA	1989	GA	TT	GACTGGAGTGCAGGCTCAGCAGCTTCTACATTCACTGCTACCTACACAGGTTTGCTTCCTGGCTGGGCCTCCTCCGTCCCTGTATCCCAACAATGATAAATTATTGCTACTGCTGTGCGGCCACTGGTTCTAGACAACAGGTTTGGTCCTTGATTTTTTT	160	196
NM_001105756.1	Rattus norvegicus phosphatidylethanolamine binding protein 2 (Pbp2), mRNA	1295	CA	AT	CACGTGTTACCAGGCAGAATGGGACAGCTATGTTCCCAAGCTGTACAAACAGCTGTCTGGGAAATAGGGGAACCATTTGACGGTCATGGCTACCCCTGCCATACCATTTATCAGGTTCAGCAATGCGTGGCGTGCCTTTCGGTTTCCCATTCTCACCTGCGTAAGGGAGTCTTGAGCTGCTGTAGGGCAGTAGTTTAGGATGACGTTTTCTCGCCGCTTGCGCTAAAGATTCCAAACAGTTGCATCCAGTTTGTTTTGGTCGAAT	265	301
NM_001025059.1	Rattus norvegicus TBC1 domain family, member 22B (Tbc1d22b), mRNA	3519				0	-
NM_001024277.1	Rattus norvegicus glycine C-acetyltransferase (Gcat), mRNA; nuclear gene for mitochondrial product	1555	GT	GG	GTGCAGATCTCAGCCGTACACAGTGAGGAAGACATCGACCGCTGTGTGGAGGCCTTTGTGGAGGTGGGGAAGCTGCACGGAGCTCTGCCCTAGGCTCAGACCAGAGGCTCTGACTCAACCCAGAGTTCTAGAGCCTGG	138	174
NM_001109652.1	Rattus norvegicus telomere repeat binding bouquet formation protein 2 (Terb2), mRNA	2124	AC	TT	ACTGGAATGTGGCTTTCCTGATTTTCCAGGCTGGTATTCATACCCTGTTTTCCTACATACCCTGTTTTCCTATGTGGACATGCTGGAACCTCTGTGTCAGATCTGTGTCTCATTGTCTTATTCAGGCTGGCTCTAGCTGCCCACTGTGTTCCAAATAAGTTGAAACTGTAGCTGTGTCTTCTGGACCTAGCTTTCATGTCTTACTTACATAAATCTAGAGATATGATAATCTCAAGAAGGCAGTTTTGCTAGGCTCGGTGGTGCTGACCTAGAATCCCAGGTACTCGGGTGACTGAAGCAGGACTATAGAAAGCTCTAGCCAGCCCAGGCAACTTCCCAAGTCCCTGCCTGAGAAGGAAAAGGTAGACAAGGCCAGTTACAAAGCCTCTGCACAGCGTG…	494	530
NM_001008513.1	Rattus norvegicus C-C motif chemokine ligand 21 (Ccl21), mRNA	860				0	-
NM_001037140.1	Rattus norvegicus protocadherin gamma subfamily A, 1 (Pcdhga1), mRNA	4548	TT	GG		0	-
NM_001109342.1	Rattus norvegicus preferentially expressed antigen in melanoma-like 6 (Pramel6), mRNA	1849				0	-
NM_001100805.1	Rattus norvegicus transmembrane protein 41a (Tmem41a), mRNA	1444	AC	TT	ACTGTGCTTCTGGTCCTT	18	54
NM_001107652.1	Rattus norvegicus sorting nexin 18 (Snx18), mRNA	4394	TT	TT	TTGTTTTCCTTTCTGTCCCACCTGTGTTTGAGCCCCAACTTCTGATGGAAGGAGCGAAAGGCGAGCACTGGTGACAGCCGATGAAAACCTCCCATTTCTGGGTCAGTGGTAGAACCAGTGGCCATCACTTTGCACAGGAAGCATCGCCTGGTAAGATGCTGGCAGTGACAGAGGCATGAGACGCTCGCTCTGCTGTCTCTGGATGTGAAGTCTCGTAGGGGAAAAGGCTGTGCACCGTATTCCCTTACAGCTGTTTGTAGCACACGGCCTCGACTCCAGGGTCACACAGACTGGGCCTGGGGATTTCAGCAATGCCCTTAGCACGTGGGGAAGAATCCAATCGGGGATAAAGTGTAGAAGCAGTGGGTGAAAATGCACTCCGTCTTAGTTTGGGGAAGT…	458	494
NM_001106291.1	Rattus norvegicus NLR family, pyrin domain containing 10 (Nlrp10), mRNA	2541	GC	TT	GCCAGTTTGATTACGTTTTCTACGTGAGCTGCAGAGAAGTGGTCCTGTTACCCAAGTGTGACCTGCCCAACCTCATCTGCTGGTGTTGTGGGGATGATCAAGCCCCAGTCACAGAGATTCTGAGGCAGCCTGAGCGGCTCCTGTTCATCCTGGATGGCTATGATGAGTTACAGAAGTCCAGCCGTGCCGAGCGCGTACTACACATTCTGATGAGGAGAAGGGAGGTACCATGCTCTCTTCTCATCACTACACGGCCTCCAGCTTTGCAGAGTCTGGAGCCCATGCTGGGTGAACGGCGACATGTCCATGTCTTAGGCTTCTCTGAGGAGGAGAGGGAGACATATTTCTGCTCCTATTTTATGGATAAGGAGCAGTTGAGAAACGCCCTTGAGTTTGTGC…	1008	1044
NM_001106045.1	Rattus norvegicus SRY-box transcription factor 7 (Sox7), mRNA	3282	AT	TA	ATGTATA	7	43
NM_001079889.2	Rattus norvegicus selenophosphate synthetase 2 (Sephs2), mRNA	2342	CA	TA	CATAGTGCCTCTAGGTACTTTTGCTAGTTCCATCAAAAGCTGCCTGTGTACATCCAGACCCAGAAGTGCAGGGGATGTGTGCTCATCTGTTGAGAGAATGAGGAGTAAAAAAACCTTTTCCCAAAGCAAGATGAGGCTATTCCAGTTTTAGGGATTTTTTGCACTGAGTTGATTCATTTCTGCACAGGGAGTAAGATTA	199	235
NM_001024283.1	Rattus norvegicus secretoglobin, family 3A, member 2 (Scgb3a2), mRNA	373				0	-
NM_001271151.1	Rattus norvegicus centrin 4 (Cetn4), mRNA	1034				0	-
NM_001109461.1	Rattus norvegicus WAP four-disulfide core domain 10A (Wfdc10a), mRNA	468				0	-
NM_001109396.1	Rattus norvegicus DnaJ heat shock protein family (Hsp40) member B3 (Dnajb3), mRNA	1014	GA	AG	GAAACTCAGGCCTTTCCTCTTTCTCCATGTCCTGCGGCGGTGGGGCGGCAGGCAACTACAAGTCGGTGTCAACTTCCACCGAAATAATCAATGGCAAAAAAATCACCACCAAGAGAATCGTTGAGAATGGCCAGGAAAGGGTGGAAGTGGAAGAAGATGGAGAG	164	200
NM_001128137.1	Rattus norvegicus lipocalin 10 (Lcn10), mRNA	1152	CC	GG	CCTCGGGGATGCCAGTCCAGGGAGGTGACTCTGAAGAAAGACAGGAAGAGACCTGTGTTCAGGAATGCCCTCAGGGGGGTAAAGGGCTTCCATGTGCTGTCCACTGACTACACCTACGGCCTGGTATACCTCCGCCTGGGGCGTGCAGGCAGCAACTACAAGAGCCTGCTGCTTTTCAACAGACAGAACATCTCTAGCTTCCTGAGTCTGCGAGAATTCCTGGACACCTGTCATATTCTACAGCTCACTAAGCAGGCCACCATCCTTCCGAAAGACGATTCCTGTGCACACACGATCCTGCCTTGACAGCCAGCCACCTTCTGCTTAGCCCTTTGACTTGAGAGTCCTCCAGATCCTGGGAATGCTCTTCTGGTTGGTGGCTGTGACATTCAGTGGCCA…	686	722
NM_001108241.1	Rattus norvegicus motile sperm domain containing 4 (Mospd4), mRNA	818	GG	AA	GGAA	4	40
NM_001012073.1	Rattus norvegicus ribosomal RNA processing 1 (Rrp1), mRNA	1836				0	-
NM_001109165.1	Rattus norvegicus fibroblast growth factor binding protein 3 (Fgfbp3), mRNA	1722	GG	CC	GGCGGAAGGCGTAGGGCATTTTAGACTAGGAACTGGGATGGAGGGTAGGCTAGTCGGGATTCCAAAATAGGGCAGCAGGTCAGGGTGAGAAGAATCTGAGTCAGCAGGAGAGCTTTTTTTTGCGGCATCTCAATTTTGCC	140	176
NM_001108626.1	Rattus norvegicus serine protease 3 (Prss3), mRNA	811				0	-
NM_001107804.1	Rattus norvegicus molybdenum cofactor synthesis 3 (Mocs3), mRNA	1961	GC	AA	GCCATCCATCTTCTACTTGGAA	22	58
NM_001109365.1	Rattus norvegicus mitochondrial pyruvate carrier 1-like (Mpc1l), mRNA; nuclear gene for mitochondrial product	872	AC	AT	ACATCATCAGCGGCCGCATGACGACCGCCCTCATCTTCTACTCCATGGCTTTCATGCGCTTTGCCTACCGAGTCCAGCCTCGAAACTACCTGCTGATGGCGTGCCATTTCACCAACGTGCTGGCGCAGAGCATCCAGGCGAGCCGTTACCTGAACCACCGCTATGGTGGCGGAGCCACGGCCAAAGCCACCAAACCTCCAGCCAAATAAGCTTCATGACTGGGGGGTGAGAGGGGGAGCCTGAACCAGACTTGGCAGCCTGCAAGCACTGGACTCTGCTCCTCCTAAAGAAAAGCCAAGGAAAACTTTGGTTTGCAAACCCGAT	324	360
NM_001127570.1	Rattus norvegicus thyroid hormone receptor interactor 6 (Trip6), mRNA	1757	GG	GG	GGAGTCATCCACCCTGGAAGTCTGGACGCTGAGATAGATTCGCTCACCAGCATGCTGGCTGATCTGGACGGGAGTCGCAGTCATGCACCTAGGCGACCAGACAGACAGGCTTTTGAGGCTCCTCCACCCCATGCTTACCGTGGAGGCTCCCTGAAACCCAGCGGAGGTGCTGTTCCAGCCCCGATGCTCCCAGCATCTCCCTATGGTGGACCTACTCCAGCCTCTTATGCTACCGCGAGCACTCCAGCTGGTCCTGCTTTCCCTGTTCAAGTGAAGGTGGCTCAACCCGTGAGAGGCTGTGGACTGCCCAGGCGGGGGGCTTCGCAGGCCTCTGGACCTCTTCCAGGCCCCCACTTTCCTCTGACAGGTCGTGGTGAAGTCTGGGGAGCTGGCTATAGG…	424	460
NM_001037154.1	Rattus norvegicus protocadherin gamma subfamily A, 3 (Pcdhga3), mRNA	4712	TT	GG		0	-
NM_001037508.1	Rattus norvegicus defensin beta 24 (Defb24), mRNA	398	GA	TA	GAGCTGCCGCCATGAAGCTGGTTCTCCTGCTTCTTGCCATATTTGTGACAACGGAACTGGTAATGTCAGGCAAAAATCCTACCCTTCAATGCATGGGCAACAGAGGATTCTGTAGGCCTTCCTGCAAAAAGGGTGAACAGGCCTACTTCTACTGCAGAACTTACCAGATATGCTGCCTCCAGTCCCATGTGAGGATCAGCCTGACAGGCGTAGAGGACAACACTAACTGGTCTTATGAGAAACACTGGCCAAGAATACCGTGAATGCTGGTACGCCATGCACAGACTTCCAGAGAAGCTGGCCCTGCAGCCTACCTCCTTA	321	357
NM_212507.2	Rattus norvegicus lymphotoxin beta (Ltb), mRNA	1195				0	-
NM_001013943.1	Rattus norvegicus aldolase 1 A retrogene 2 (Aldoart2), mRNA	1715	GT	TC	GTCTCTGCCTACCCACTTGCTCTTGAGGAAAGGGGCCTTCAGGCTCTCTCCCATCAATCCCTCTTGCTGCCTCTCATGACTTTGGTGTGTGGTGTTGTCTGTGAATGCTGACTCCATCATCCCTTCCAGCTCGATGCTAATCAACAACCATTCAAAGGGGAGGGGAGAAGGGCCAAATCTGCCCCTTTGTC	191	227
NM_001109237.1	Rattus norvegicus neuronal differentiation 6 (Neurod6), mRNA	1953	AT	CC	ATCTGCTCACGTTCGTCCAAAACTTATGCAAAGGTCTTTCTCAGCCAACTACAAACTTGGTGGCAGGCTGCTTACAGCTCAACGCCAGGAGTTTCCTGATGGGTCAGGGTGGGGAGGCTGCCCACCACACAAGGTCACCCTACTCCACATTCTACCCACCCTACCACAGCCCTGAGCTGGCCACTCCCCCAGGGCATGGGACTCTTGATAATTCCAAGTCCATGAAACCCTACAATTACTGCAGTGCATATGAATCCTTCTATGAAAGTACTTCCCCTGAGTGTGCCAGCCCTCAGTTTGAAGGTCCC	308	344
NM_001029913.1	Rattus norvegicus NFKB activating protein-like (Nkapl), mRNA	1519	AA	AT	AAGATGTGTGGATGGAACAGTCGATGAGTGCAGATAGCACAGAT	44	80
NM_001108671.1	Rattus norvegicus receptor tyrosine kinase-like orphan receptor 1 (Ror1), mRNA	3533	AA	AA	AAAGACACCAACCAGGAAAAATAATGCATTGTGGGATTTACACTCCATCAGGGTGTATGATATGTTGTTGGGAACAGACCTTTTATTTCAAGGACTGAAAACTGCAAAACCAATGAAGATGAACAGAACATAGTAA	136	172
NM_001109355.1	Rattus norvegicus immunoglobulin (CD79A) binding protein 1b (Igbp1b), mRNA	1351	TG	TC	TGCTCTCGTTTAGGCATTGCTGTCACCACGGTGTATTGCAGTTTC	45	81
NM_001037139.1	Rattus norvegicus protocadherin gamma subfamily A, 2 (Pcdhga2), mRNA	4718	TT	GG		0	-
NM_001007756.1	Rattus norvegicus gem (nuclear organelle) associated protein 8 (Gemin8), mRNA	1186	GC	TT	GCCCCTAGACAATGCCTCACAGTCCCTGGCCTCTCCCTATTCATCTCTTATGGACATTTTCAAAGAAAGAGGCCTGTATGCCAACATGGCGGACACAGTCTGTCAGCCACTTATAATTCTGTCAGCAGGAGACATACTGTTGCCAACACAAGGAATATTCACTTGACATGTGTATTGCACTGGCCTTGGGTTTTCTCTGTAATAGTCCAGTTCATTGAAATTATTGCCTAGAGGTACTGCCTATTGTTTTGCATT	255	291
NM_001108673.1	Rattus norvegicus mediator complex subunit 8 (Med8), mRNA	648				0	-
NM_001135260.1	Rattus norvegicus transmembrane protein 167B (Tmem167b), mRNA	644	CT	CA	CTGCATGCTGCTGTTGCAATTGCCTGCATCGTAATGGCCTTTTACGTCCTGTTTATCAAATGAATTCCAAACCATCCAGCTCATCAGCTGCCAACCCAGGGGATAAAGATGAAGAACTTGTCGGAAACCTGGACCCAGCATAGGAGAGTTGAGCTAAAATCGTCAGTGTCCCCAAGATGACACTGAAGCGTCTGCCTGCCACATGTGGGGAAAACTCATGGTCACAAACATTTTTGTTTCAGGGGATTCCAGAAAGCCAACCTTTTTTGATCTCTGCA	278	314
NM_001109436.2	Rattus norvegicus monoacylglycerol O-acyltransferase 2 (Mogat2), mRNA	1774	AA	AG	AAGACAGCTGCATCTGAGCGCCTGCAGGAGTGCTGGGATGAGAGGGATTTCCACAGCCACCAGGAACTCCTAGGAGCCCAGCCACAGCTGGCAAGATGGAGGCAGTTCCTAACCCTGGGATTCGTCCCTGCAGCCAAAGCTCTGAGCTCTCCCTGTCCTTGGTCTGCACATCTGTAGAATGGGGGGGAAAGCAGGCAGAGAGCAATTCCTGAGGTCTCTCTCCACAGTTGTAATGTCATTCAAACATGACCAAAGGACAGCCATGGAGAAAGAGAACAAAATTGTTCTTTACCTACCCTTGAGGGACAGTGCAAGAGGAGCCAGCACCCCAGGCCTCTCTGTACATGCCCCCTGGATGCCTCTTCTTACCCTCTGAGCTGGAGAGGGGAAGCCATATAT…	473	509
NM_001109379.1	Rattus norvegicus DND microRNA-mediated repression inhibitor 1 (Dnd1), mRNA	1517	TT	TA	TTTTATTTATA	11	47
NM_001107819.1	Rattus norvegicus transmembrane protein 203 (Tmem203), mRNA	829	GC	TG	GCTTGTCGGGTCAACTAGCCTCCTGCAGAGGCTG	34	70
NM_001108169.1	Rattus norvegicus family with sequence similarity 83, member B (Fam83b), mRNA	3390	GG	TA	GGATTTATGCAAAAGTTTGGGAACTTCATACACAAAAACAAGTGAAATACTTCCATTTCAAATTGTAATTGAAATATACAGTGAATGTGGCTGTACACATTTGCCCAAAGAACACTCTGCACACTTTTTTAGACCATGCCAAGAGTGTTCTGTATGAGAACTGGAGAAATACATAACAGTATACAGAAAAGTTATTGTTTTGTGCTCAAACCAGTTGCACTTGGTTACTCCACAAAGCGCTATCCCAGTCAACATA	256	292
NM_001113748.1	Rattus norvegicus ring finger protein 26 (Rnf26), mRNA	2222	AA	TT	AAGACTCCAGTCTGGGTGGGACAGAGTAACACTTTCTCTAAATGCTGTGTGGGGCCCTGAGATGCTGAGGGTGGTGAGTATGTCACTATGCAAGGGCCCTGAGACTCTGTGGTGGGCTCTTCTGCACCTGCCCACCCAGATGCCTGCCTCTAGGGCTGTCTTTCTCTGCTTCTGGCTTTTTTTTGTTGGGAGTTTTTGGTCCTATTCCCCCAAGGCCACGCCACATCAGTGTCATTTGAGGATTTTGGCAACTCATGGACCTTGGAGTGATCTTGATTTTCTCTCTCTCTCTCTCTCTCTCTCTCTCTCTCTCTCTCTCTCTCTTTCTTTCTTTTGTTTATTCTTGGTTTGGAATGATCTTGGGCCTTTATGTTCAGCCAGAACCTCTGCCCTGGTGGG…	455	491
NM_001109533.1	Rattus norvegicus charged multivesicular body protein 1B (Chmp1b), mRNA	2531	TT	TT	TTCCGTGGGAACGAGCGTAGCTTCGGCTGAGCAAGATGAACTGTCCCAGAGATTGGCCCGCCTTCGGGATCAAGTCTGACCGCCGAACGAGTCCGAGATTTCCTTTGGACGTGCTCTCTGTGTTTTATAGAGAGATGTCCTAGAATTGTGCCAGAATGCCGAACAGTCTTCTAAGAACCTACAGCCCCCTCCAGATAACGCTAAGAAATTCCAGTTTTTCTCCACTTCTAACTGGATT	238	274
NM_001105921.1	Rattus norvegicus RNA polymerase II subunit J (Polr2j), mRNA	728	GT	AG	GTGGCCATCAAGGACAAGCAAGAAGGAATTGAGTAGCAGCTGAAAGAAGCTCAGTGGCTGTAAGGCTGGTGCGTGTATCTGCCCTTCTCCGTCCACCACGATGGCGACAGCCACTCTCAGCTCTCCAGCTGGGCACAGGACACTGTCCCATTCTGTACATAGACTGTTATTTTCCTAATAAAGTACAGCAAAAGAGGGGCTGTGCGGCATGTGGCCTGTCACTGAGACCCAAACCACAGGCTGGGCAGAACCTGGGACTGCTGGGCCTGCCTGAG	275	311
NM_001107246.1	Rattus norvegicus solute carrier family 49 member 3 (Slc49a3), mRNA	2733				0	-
NM_001108443.1	Rattus norvegicus zinc finger protein 330 (Zfp330), mRNA	1920	CC	AT	CCCGCGGCTTGGCCTCGCCTCTGCGTCCTCGGCCACTGAGAAAGAAGGGAACATGCCGAAAAAGAAGACTGGAGCAAGGAAGAAGGCAGAAAACCGCCGCGAACGAGAGAAACAACTCAGAGCATCAAGAAGTACCGTTGACCTAGCCAAGCACCCGTGCAATGCTTCAATGGAATGTGACAAGTGTCAGAGGCGGCAGAAGAATAGAGCATTTTGCTATTTTTGTAACTCTGTTCAGAAGTTACCAATCTGTGCACAGTGTGGAAAGACCAAGTGCATGATGAAGTCTTCAGACTGCGTCATCAAGCATGCTGGCGTGTACAGCACTGGCCTCGCCATGGTGGGCGCAATATGTGACTTCTGCGAAGCATGGGTTTGCCACGGGAGGAAGTGTCTTAG…	569	605
NM_001109527.2	Rattus norvegicus coiled-coil domain containing 87 (Ccdc87), mRNA	2722	AC	CA	ACCCAGAAAACCATCCGCCAATCATCCATGTCCACAAGGAACAACAGCCAGGCTTTGATGGCCCCTGAGAACACTCCCATTACTCA	86	122
NM_001109613.1	Rattus norvegicus transmembrane protein 215 (Tmem215), mRNA	3004	GA	CT	GAGGCATGTACTAGGAATTACTATATCCCT	30	66
NM_001109210.1	Rattus norvegicus cerebellin 4 precursor (Cbln4), mRNA	2903	GA	TG	GACTCCAAAGCTGAAAAATCCCTAATTGCTTTCGTG	36	72
NM_001170399.1	Rattus norvegicus transmembrane protein 130 (Tmem130), mRNA	2774				0	-
NM_001109466.1	Rattus norvegicus flavin containing monooxygenase 9 (Fmo9), mRNA	3003	CT	TT	CTGCTCTGTTAGTTCACCTGGCTTTCTGACCGCTCTCTCCCTGTGTGGGATACATGGCTTCTCATTCCACCAACTACCAGAAAGTGTCTCCTAAGACTCCACCTCTGCCATTTTGTTCTCCTGATTATAAAATGCCAAACAACCATGGGACAAAACTGTGAAGACCAAGTGGGGAGAGGAAGGAGCACGAGAACTTGCATCCCAGAAGAAGCCTCACTCAGCTGAAGCATCCCGAGGAAAGTTTGCTCACTGAGAAACAGCTTAGTTGCTCAGCAGAGTAACTCAATTGAAAGCCCACTTGTTTTTCTGAGATGGGAAAAAAATGCCCACATGCATTCCAGGAATGGAAAGGGGTGAAGAGAATTCTGTGTCTCGGGACTTCCACTGCTACCCAAGATG…	521	557
NM_001109074.1	Rattus norvegicus spermatogenesis associated 46 (Spata46), mRNA	791				0	-
NM_001393983.1	Rattus norvegicus MHC class I antigen-like (LOC120893167), mRNA	1876				0	-
NM_001106207.1	Rattus norvegicus myc target 1 (Myct1), mRNA	1560	CC	TT	CCAGACTTCCGCTGGTCCAGCAACAGTTTGCGGATGGGCCTTTCCACACCACCCCCACCTGCCTATGAATCCATCATAAAGGCATTTCCCGATTCCTGAGCCTGGGCTTTCGTTGTTT	118	154
NM_001107785.1	Rattus norvegicus SCP2 sterol-binding domain containing 1 (Scp2d1), mRNA	751	CT	GT	CTTCCTGCAGACACCATCTTCATCATCCCTGACACGGTCTTCACAGAGTTAGTTGTGGGTAAGATGAACCCACAGAAGGCTTTCCTGGCTGGCAAGT	97	133
NM_001107941.1	Rattus norvegicus DDB1 and CUL4 associated factor 12-like 1 (Dcaf12l1), mRNA	3530	GC	TC	GCCTTGTTCAAAGCTGGCTAGGACGTGTTTACCGTGGATTGGTATTGGGTCATGTTTCCTTTTTC	65	101
NM_001044263.1	Rattus norvegicus regulatory factor X-associated protein (Rfxap), mRNA	1665	GA	TC	GAATCCTTACTCAGCCCACCAAGGCCAGGGCAGGTTTGGTTTTCTTATAGTCATTC	56	92
NM_001109635.1	Rattus norvegicus similar to OTTMUSP00000000621 (RGD1565323), mRNA	712	TC	TA	TCAATAAAGTATCAAATCTCTGCCTTCCCTCATGTTCTGTGAAGCCTGTTCTATCTGGTTCTCACAAGTCAAATGATAGAGTCCCACTGCACAGCATTTACTTCACACTTTCGATTGTATAAAGGCACATTCTCGTTA	138	174
NM_001109390.1	Rattus norvegicus protocadherin beta 9 (Pcdhb9), mRNA	3171	AA	AA	AAGTTGCTCGGAACGCCGTTCAGGAAGATGATGATGCTCTTACACTGTACCTGGTCATAGCCTTGGCATCTGTGTCTTCTCTCTTCCTCTTGTCTGTGCTGCTGTTTGTGGGGGTGAGGCTGTGCAGGAGGGGCAGAGAGGTCTCTCTGGGTGGCTGCTCTATTCCTGATGGACACTTTCCTGGCCACCTGGTGGATGTCAGTGGAGCAGGGACCCTGTCCCAAAGTTACCAGTATGAGGTGTGTCTGAGGGGAGACTCTGGGACTGGTGAGTTCAAGTTCCTGAAACCCATGGTCCCCAATGCTGGGATAGAAATTATGGAAAGTCCCCACTGCAGGGAAAGCTTTGTATTCAACTAAGTATTCTAAATGGTCCAA	377	413
NM_001009687.1	Rattus norvegicus RIO kinase 2 (Riok2), mRNA	1814	CT	TT	CTGCAGAAAGGAGAAGCCAATATATTTACCAAGCAGCGGAGGGAAAACATGCAGAATATCAAATCAAGTTTGGAAGCAGACAGCTTTTGGGGAGACTAATAAATTTTTGATCTGTATATTTTTTTAGATACTGTAATTCTATTTTTAGCCAGTATATTGGTCTTT	165	201
NM_001013937.1	Rattus norvegicus actin-related protein T2 (Actrt2), mRNA	1427	CT	CT	CTGCTCCTGGCCAGTGGGAGAGCCTTTCCATGCCCACTGGACAAGGCCCTGGTGGATGATATCAAGGAGAAGCTGTGCTATGTGGCCCTGGAGCCTGAAGAGGAACTCTCTCGGCGGGCAGAAGACGTCTTGAGGGAGTACAAACTGCCTGATGGGAATGTCATTTACATCGGAGACCAGCTGTACCAGGCTCCTGAGGTCCTGTTCTCACCAGACCAGCTGGGCACCCATGGCCCAGGTCTGGCACAGATGGCGTCCAACAGCATAGCCAAGTGTGATGCTGACATACAGAAGACACTCTTTGGGGAGATTGTCTTGTCGGGGGGGAGCACTCTGTTTCAGGGGCTGGATGACAGGCTCCTAAAAGAACTGGAACAGCTGGCTTCCAAGGGGGTCCCC…	475	511
NM_001109326.1	Rattus norvegicus keratin associated protein 14 (Krtap14), mRNA	843	CT	AT	CTGCCAGACATCCTACGTGGTCTCCAGACCCTGCCAGAGGCCTTTCTACAGTCAGGGGATTCGAGGGTCCTTCAGCCCCTGCCAGTCAACTTTTTCAGGATCTCTGGGACTTGGTTCCAGGGGTTTCCAGTCTTTTGGTTGTGGCTACCCAACCCCAGGATTTGGATCCCATGGTTTCCAGTCAGTGGGATGTGGTACCCGTACTTTCTCCTCCCTAAATGGTGGGTCCAGCTTTTTCCGCCCAACCTGCTTCTCTTCCAAAAGCTGCCAGTCTGTTTCTTACCAGCCAACCTGTGGGACTGGGTTCTTCTGATCCGTATTGGGGAAATTAGAAATGTAAAAGGTACCTACTACCTTCTATGCTAAGAGCCGCACTGCCTTTGGATTTTCTGCATTAGT…	447	483
NM_207605.3	Rattus norvegicus SH2 domain containing 2A (Sh2d2a), mRNA	1587	TC	CA	TCTTTCCCTAAGGGGTGAATCAGACTCTGGAAGCAGAAGACAGGACCCAGACACCCAGCACAGCCTGTTCATCCAACAGGGGCAGGCCCATGCCCAGGCCCCAGGACATAAAGAGAAAGTGAGGGCCTCCCAACAGAAGAAGACTTCCCAGGCATCCAGACCCAGGCCCCCCATTCCTGCCAAGCCTCAGCTACCTCTTGAAGTCTACACAAGTCCTGCTCCACGACCTCATCAGGCCCTACCCA	245	281
NM_001029914.1	Rattus norvegicus CKLF-like MARVEL transmembrane domain containing 1 (Cmtm1), mRNA	1896	AA	TT	AAACCGTCAAAATACAGGATAAGGACAGGGTCTCAAAAAGATTCAGAGATGGCTTCTGTAATTTTTGCTGCTCAGCCAATGGGATGTTGAAGGCCTTGAGGATGTGCATTACTGCAGCATCGGTATTTTGTTTCGTCATTGGTGGCGCCCAGGACCTGTTTGTAGCCATCATGATTCAGGAAACCTGCATCGTCTTATTTTTTATTATAATCTATTTGATAGCCCTTCAACACTTCCTGACCTGTATCCACTGGCCTCTGCTTGATCTGATCAACACTCTCATTTCAATGGCATTTCTTGGAATAGTTAGCATAATAACCATGACGACAGAAAACAGTGAAAAGAATCTGACTTTTATTGGAGGGGTCCTGTGCTTCTCGGCAGCAGTCCTGTGTGTCA…	625	661
NM_001170709.1	Rattus norvegicus proline rich 30 (Prr30), mRNA	2013				0	-
NM_001109351.1	Rattus norvegicus H1.8 linker histone (H1f8), mRNA	1149				0	-
NM_001106195.1	Rattus norvegicus spermatogenesis associated 33 (Spata33), mRNA	559				0	-
NM_001044702.1	Rattus norvegicus prolactin family 5, subfamily A, member 2 (Prl5a2), mRNA	919				0	-
NM_001110056.1	Rattus norvegicus motilin (Mln), mRNA	206				0	-
NM_001108957.1	Rattus norvegicus NUT midline carcinoma, family member 1 (Nutm1), mRNA	3688	GA	AC	GAGTCTTATACACATGAGACAACCAAATCGACATCTGGCCAGGGCCAGGGCAGAACTTCCCCAAGGTGGGGAACCAGGGAGGCTTTGGTTCTGAGAGAAATCCCTGTTAGAGAAACATGCACCTCAGCCGATACAGCCAAAGGAAGTGAGACAGAGAAGGAGGAAGATGAAGAACTCTCCAACTTCTCCTACCTTTTGGCTTCAAAAC	208	244
NM_001109481.1	Rattus norvegicus reprimo-like (Rprml), mRNA	1005				0	-
NM_001109545.1	Rattus norvegicus autophagy related 2A (Atg2a), mRNA	6340	CT	TT	CTCTGGGGCCTCTGCCCTGTCTGTGCACTTTCGTCTGGGGAGAAAGGACGCTGCTCCTCCCTGCTACCTGGGCCCACACTGCTGCCTTGTTCCAGAATGAGGATGGAGGCTTTTGGACCCATGGACCCCACTCAGCCAAGTGTCTCTCCGTGTCTCATGGGGAGGTGGGGGATAGATGCCATGTGGGTCAGTGTATTT	198	234
NM_001106275.1	Rattus norvegicus abhydrolase domain containing 2, acylglycerol lipase (Abhd2), mRNA	2023				0	-
NM_001108914.1	Rattus norvegicus potassium voltage-gated channel subfamily A member 7 (Kcna7), mRNA	3592	GA	GG	GAGACAGAGGGCGAAGAGGCAGGGATGTACAGCCATGTGGACACACAGCCCTGCGGTACACTGGAGGGCAAGGCCAATGGGGGTCTGGTGGACTCTGAGGTGCCTGAACTCCTTCCACCACTCTGGGCCCCTTCTGGGAAACACATGGTGACCGAGGTGTGAGGGACAGCTGGGGTCTCCAGGAAGCAGTGGGGTGGGAGGGAGGCGGGAAGGCAGGGTCAGGTGCTGGG	230	266
NM_001402237.1	Rattus norvegicus PDZ and pleckstrin homology domains 1 (Pdzph1), mRNA	4135				0	-
NM_001109244.1	Rattus norvegicus ladybird homeobox 2 (Lbx2), mRNA	816	GT	CG	GTGGAGGGTAGAGACCCATTTAGCTCTGTTCTGTTCCTAACTCCACACTCCTACTTTTCTTACTCG	66	102
NM_001109166.1	Rattus norvegicus T-cell leukemia, homeobox 1 (Tlx1), mRNA	2000	TC	TT	TCTTCGGTGGAAGAGGGTGGAGATAGAGGCAGAAGCCTGCGTGATCCTGTCTCACTCTGGAACTGTTCAGAATCTCCTCTTTTTCTCTATTTCATAAAATTTACTCTGATT	111	147
NM_001106692.1	Rattus norvegicus chymotrypsin like elastase 3B (Cela3b), mRNA	907				0	-
NM_198729.1	Rattus norvegicus variable coding sequence A2 (Vcsa2), mRNA	662				0	-
NM_001109258.1	Rattus norvegicus transmembrane protein 70 (Tmem70), mRNA; nuclear gene for mitochondrial product	1766	AC	GG	ACAGTATTTGGTGTGAAATGTTTCTCTTATTCTACAAGTGTGGTCAGCCTTGCATTCTTACCGTACCTTCTCTCACAAAGTAACATGATGTTTGGAAGTCTGCCTTTGCAAGTCTTATTTTATGGAGTCATGGGGAGCTTCACGGTGATCACTCCCACGCTGCTTCACTTTCTTACAAAAGGCTATGTCATTCGGTTGTACCATGAAGCCACAACAGATACTTACAGAGCCATTACTTACAATGTTGTGCTTTCAGAAAGCAGCACAGTGTTTCACCAGGGTGACGTGACAGTTCCAGAGAGTGCACACATATTTACCACTTTTTATGCTAAAACAAAATCGCTATTGG	349	385
NM_199504.1	Rattus norvegicus protocadherin alpha 2 (Pcdha2), mRNA	5244	AA	TT	AATATCAGCTCATAGAAAGTAATAAAATTTGCTGTTACCATAAATAAGACATT	53	89
NM_001106637.1	Rattus norvegicus GTP binding protein overexpressed in skeletal muscle (Gem), mRNA	2093	CA	TG	CAGACAGAAGACATTCCTATAATTTTGGTTGGCAACAAAAGCGACTTAGTGCGGTGTCGAGAAGTGTCTGTGTCAGAAGGGAGAGCTTGTGCCGTGGTGTTCGACTGCAAATTCATCGAGACCTCTGCAGCCGTGCAGCACAACGTGAAGGAACTGTTTGAGGGCATTGTGCGGCAGGTCCGTCTGCGTCGGGACAGCAAGGAAAAGAACGAGAGGAGGCTGGCCTACCAGAAGAGGCGGGAGAGTATCCCCAGGAAAGCCAGACGCTTCTGGGGCAAAATTGTAGCCAAAAACAACAAGAACATGGCTTTCAAGCTCAAGTCAAAATCCTGCCATGACCTGTCTGTGCTCTAGGCACCCAGTGTCGTCCAGATGTCCCCTTGATGGACGTCGTTGAAG…	445	481
NM_001013033.1	Rattus norvegicus TSPY-like 1 (Tspyl1), mRNA	2584	GG	TT	GGGCTCTTCTATTTACCTGTTCAGCACGTGGCAATGTGGGCAAAAAGTTTTCAGACAGTTGCTGGGCCTAAAGGTCATTGCAGGAGTGGGCCACCTTCTGTGTCATTTTGTGACTTTTTCTAGGCTTCATTGTGTTTGCCAGTACTCCTCACCCTCACTCTCCCACCTTTCTCCTGTTATT	181	217
NM_001106345.1	Rattus norvegicus L antigen family, member 3 (Lage3), mRNA	743	AG	GG	AGGATAAGGCGGGTTCTGAGCCGCAGCAATGGCGGAGGAGGCGGGCTGGTGACAGGAGGATAGGTTTGAAGGAGGAGCAACAGCAGCCATGCAGACGGCACACGCAGGG	109	145
NM_001100601.1	Rattus norvegicus membrane associated ring-CH-type finger 9 (Marchf9), mRNA	1659				0	-
NM_001164288.1	Rattus norvegicus protocadherin gamma subfamily C, 5 (Pcdhgc5), mRNA	3157				0	-
NM_001109546.1	Rattus norvegicus visual system homeobox 1 (Vsx1), mRNA	2814	AG	GT	AGTTGTGT	8	44
NM_001039333.1	Rattus norvegicus zinc finger, DHHC-type containing 25 (Zdhhc25), mRNA	1233	AA	AA	AACATTACAAAATGAGTGAGCCTCACAATACGGCCTGAGTCATTTACGGGTGTCCAGAGCAAAGCACAGTGCCACACAAACCTGAACAAGCCAGTTCCCTGAAGGAAACCAACACGGCAGAGTAAAAAGTAATATACCTCAGATTTTCTTGGGCAATAAAACAGGAGAGGAAAGTCAGGTGTCGCAGGAACGCAGAGGAAATTGAGCTTCCTGTGCCCGATTGGGGCTCTACCATGCTGTCAGGTGGAAAGCAA	254	290
NM_001109260.1	Rattus norvegicus vexin (Vxn), mRNA	3252	AT	GT	ATACTGATGAGTGGTATCTGCCTGTGGAGTGGTCGGTAACGTAGACCTTATATATTTCTCATCTGTGGCTTACAGTCTGCCCCTGGAAGTTTTGTTCCCTAATTCAGAGGT	111	147
NM_001108621.1	Rattus norvegicus family with sequence similarity 180, member A (Fam180a), mRNA	1573				0	-
NM_001007015.1	Rattus norvegicus ribonuclease A family member 2 (Rnase2), mRNA	650				0	-
NM_001105974.1	Rattus norvegicus gremlin 2, DAN family BMP antagonist (Grem2), mRNA	3719	GG	CC	GGAGGCCTCCCTGTGCATGGCATGTACGGAATCTGACAAATGTGAATGAGAAGCCATTGGTGGGAATCAGAATATGCTAAAACCCTTGGGTTGATCATTTCTGAGTCCACGCTCTTGCCAAGAACGGGTTTCCTAGTATGTGAGAGAGATGATCCATAAGCTGATGGAGACTCAAGCTTCTGGGTACTTAGCAATGATGTTGGCTCTCCAGTCTGCCACTTGGAGAAAGAGGGTTGTGATGAGCTGGGGAGGGTGTGTCATGGAGCCTTTTGCCTGTATTGCAATGCAGGTTTTCTAGTTTAGTTACGTCTGCCACACAGTGACCCCAAGTACAGAGTGTGTGGTTTTGAAGGGGATTTTAGCTTCAGAAATGAGAGCGCCCAGCCTGGGAACAGGAGA…	578	614
NM_001108398.1	Rattus norvegicus hyaluronan and proteoglycan link protein 4 (Hapln4), mRNA	3687	TC	TT	TCCCTCTATCAGTGTGGTGGAGTTCTCAGGCCAGGTTCAGAAGCAGCTCCTCTCCCCTTTCAATGCTCACAACCTGAGCATAGAAAAGCGGAACAGTTTACCAGGTGTCAAGACCAGGACCCTTTGAGGTCCTGTCTGACTCCTCATGTGCTCTGTGGCATGAGTGCATACACATAACTCATCATAACATGATT	194	230
NM_001109471.1	Rattus norvegicus S100 calcium binding protein A7A (S100a7a), mRNA	581				0	-
NM_001109150.2	Rattus norvegicus family with sequence similarity 181, member B (Fam181b), mRNA	1522	GC	GA	GCGGGGAGGACGCACCAGCCTTAGCCTCTTTCACCCCCTTCTTCCCAGATTGTGCGCTGCCGCCGCCCCATCAGGTGTCCTACGATTACAGCGCGGGCTACAGCCGCGCGGTTTACCCCAGCCTCTGGAGACCAGACGGGGTCTGGGAAGGGGCTTCTGGGGAGGAGGGAGCGCATCCAGACTGACTGCGAGGAACCCTTTCCTTCCCTTATGACTACTGTGGGCTGCGTGCCACCATGGGTTTCTTCTGAGTGGAGAGAACGACGGGATCACGCATGTGAAGATGAAATGGGA	294	330
NM_001101003.1	Rattus norvegicus potassium voltage-gated channel subfamily E regulatory subunit 5 (Kcne5), mRNA	616				0	-
NM_020305.1	Rattus norvegicus a disintegrin and metalloprotease domain 4 (Adam4), mRNA	2472	CT	TA	CTACCTTTCAGGAAAAACTTCGAGCTGAAATACATGTGAGTATCAACAGGCTAATAATTATTATAGGTACTCGCATCCTTCTTATCTTGGCTTCAGTTCTTTTTGGTGCGCTTTTCAGAGCACTAATGCTAGAGACTGAAAAAAAGAAAAAAAAGACCCAACATCCAACTA	171	207
NM_001037337.1	Rattus norvegicus protocadherin gamma subfamily A, 12 (Pcdhga12), mRNA	4738	TT	GG		0	-
NM_001017483.1	Rattus norvegicus similar to human chromosome 21 open reading frame 140 (C11h21orf140), mRNA	2606	AA	AG	AAGCAGAACTTTATTCTTTGCTGTTCTGGCTATGGGGAGCCAGACGTCATTTTCACGGACTGTCAGCAGCATGGCCACGCTGCTGCGGACTCTAAGGAAGACTGCCACAAGTGTCTCCCAGTTTCTGATGGCCCTCTTGCCCTTGGCTAGTGTCATCTGCTGTCCATGAAGCAGAAGCTGATGAACAGGCTCCATGGGCTTCGAGCCAGAAATGCTGGAAGAG	223	259
NM_001108075.1	Rattus norvegicus sphingosine-1-phosphate receptor 4 (S1pr4), mRNA	2277	TT	CA	TTCTGAATCACCAAGATATGCTGTGACAGGAAGCTGTGGACTCTACCTTGTGACAGTACAGCTGCGAACCACACAGGACTGTGTAAAATGCA	92	128
NM_001106067.2	Rattus norvegicus collagen beta(1-O)galactosyltransferase 1 (Colgalt1), mRNA	3039	AA	GG	AAGCGCATGCAGGTGGAGCACCCTGAAAAAGCTGTGCCCCGTGTAAGGAACCTGGTGGAGGCTGATTACTCCTACTGGACACTAGCCTATGTAATCTCCCTGCAAGGTGCTCAGAAGTTGCTTGCTGCCAAGCCACTGGCCAAAATGCTACCTGTCGATGAGTTTCTGCCTGTCATGTTTGACAAGCACCCAATGTCAGAATACAAGAGTCACTTCTCTCCCCGCAACCTGCGTGCCTTCTCCGTGGAGCCCCTCCTTATCTACCCTACACACTACACGGGGGATGATGGTTATGTGAGTGACACAGAGACCTCAGTTGTGTGGAATAATGAACAGG	337	373
NM_001106302.1	Rattus norvegicus H6 family homeobox 3 (Hmx3), mRNA	1362	GC	CA	GCTGTGGCCAGCGACCTTGGGCTCACTGCCTTGCCTCCCACCCCCCAATAGCATTTTGTAAGTATTTGCAATGCATTTTCGTGCAATTCATTCCTATGAATTTGAGGCGCTTCTCCTCTTATTTTTGGTTTTGCTTTCCA	140	176
NM_001134544.1	Rattus norvegicus zinc finger protein 865 (Zfp865), mRNA	2364	GC	CC	GCTGGGGACCGAACCCAGGGCCTTGTGCTTCCTAAGCAAGCGCTCTACCACTGAGCTAAATCCCCAGCCCCCACTAAACTCTTCTGGAAGCAACTGAGAGCACATACTACAAGCAGGCATTCACTTGGTGTCCCC	135	171
NM_001107129.1	Rattus norvegicus COP9 signalosome subunit 6 (Cops6), mRNA	1173				0	-
NM_001115043.1	Rattus norvegicus transcriptional and immune response regulator (Tcim), mRNA	1318				0	-
NM_001014240.3	Rattus norvegicus aldo-keto reductase family 1, member C12 (Akr1c12), mRNA	1240				0	-
NM_001108813.2	Rattus norvegicus NADH:ubiquinone oxidoreductase subunit A1 (Ndufa1), mRNA	440				0	-
NM_001009718.1	Rattus norvegicus killer cell lectin-like receptor, subfamily A, member 1 (Klra1), mRNA	1207	GT	CA	GTTATTTCAGACAATTACTGGATTGGATTGAAATATCATAATGAAGAAAAGGGATGGGCATGGACTGACAATGGAGAATCTAAACTTGTACTGAGCAGAAGGAAGTTCAATCTAAAAGATGGAGGATGTGTATTCTTATCTAAAAGAAGACTAGAAAATACTAAGTGTGATAATTCATACAGCTGTATTTGTGGGAAGACACTGGATAAATTCCCTGGTTGATTCTCAGAGCA	233	269
NM_001012749.1	Rattus norvegicus Ly49 stimulatory receptor 5 (Ly49s5), mRNA	1443	AT	TT	ATT	3	39
NM_001033062.1	Rattus norvegicus claudin 23 (Cldn23), mRNA	1739	CA	TT	CAAACTCAAGGTCGGATTCCCGATGCCACGACCGCCACCCAAGGCCTACACCAACCCGATGGATGTGCTTGAGGGAGAAGAAAAGAAGACAGCCTCCTCCCAAGACGGTTCCTCATCTCGCAGCACTCGGCCCTGCCAAAATTCGCTGCCCTGTGACTCCGACCTGTAGACAGGGCTCAACTGAGCTCCACCTGTGGTCTGAGGGTGACTTGAACTTCTACATGGCCAGTACATCTGCAACCAGAACCCTGGACGCCTTCCTCTAACTGGAGGGCAAGCCTTCCTTTCCTGGCCAAGCTCCTCTCCAGATACTAGGTTGGGTTCATTTATCTT	333	369
NM_001106780.1	Rattus norvegicus netrin 4 (Ntn4), mRNA	2092	GT	TG	GTTTCTACCGAGACCTCAGGAGGCCCTTCTCTGCCCCCGATGCTTGTAAAGCATGTTCCTGCCACCCAGTTGGCTCGGCGATCCTTCCTTTCAGCTCGGTGACCTTCTGCGACCCCAGCAATGGTGACTGCCCTTGCAAGCCTGGGGTGGCAGGGCCACATTGTGACAGGTGCATGGTGGGATACTGGGGCTTTGGAGACTACGGCTGCAGACCTTGTGACTGTGCGGGGAGCTGCGACCCGCTCACGGGAGACTGCATCAGCAGCAATGCTGACGTGGACTGGTATCACGAAGTCCCCGCCTTTCACTCTCTGCACAATAAGAGTGAGCCAGGCTGGGAGTGGGAAGATGAGCAGGGATTTTCTGCACTTCGACACTCAGGTAAATGTGAATGTAAGG…	452	488
NM_001109409.1	Rattus norvegicus keratin associated protein 31-1 (Krtap31-1), mRNA	933				0	-
NM_001107671.1	Rattus norvegicus phosphatidylinositol-specific phospholipase C, X domain containing 3 (Plcxd3), mRNA	1882	CA	GT	CACCATGGCTTCGTCTCAGGGGAAAAACGAGCTGAAATTCGCCGACTGGATGGCAACTCTGCCTGAGAGCATCCACAGCATCCCCCTCACCAATTTAGCCATCCCAGGGTCCCATGATTCCTTCAGCTTCTACATTGATGAAGCTTCTCCAGTAGGCCCTGAGCAGCCAGAAACTGTCCAAAACTTTGTCTCTGTGTTCGGAACTGTAGCCAAGAAGCTGATGCGGAAATGGTTAGCCACTCAAACAATGAGCTTCACTGGTCAGCTGGGAGCTGGAATCCGTTACTTTGATCTTCGAATTTCCACCAAGCCCAGAGACCCAGACAATGAACTGTATTTTGCTCATGGCTTATTCAGTGCCAAAGTCAATGAGGGTCTTGAAGAGATCAATGCATTTCT…	544	580
NM_001106114.1	Rattus norvegicus histone cluster 1 H2B family member O (Hist1h2bo), mRNA	565	GG	TT	GGAGCTGGCCAAGCACGCTGTGTCCGAGGGCACCAAGGCGGTCACCAAGTACACCAGCTCCAAAATCCTGTGGAACAAATTCTATTATCTTCCTTCCTT	99	135
NM_001126091.1	Rattus norvegicus small nuclear ribonucleoprotein polypeptide F (Snrpf), mRNA	849	TA	TC	TATCATTCCAGGGGACTCTTTTTGTAACCCCACCACTGGCTGGCTTGTGTGTTTATTTCTGTAAAGGATGGCTCTATGCTTCATAATTTTTC	92	128
NM_001108498.1	Rattus norvegicus nuclear receptor interacting protein 3 (Nrip3), mRNA	3859	GC	CA	GCAGGGAAGTGAGGATGGGCAAGCCCTCAGTACAAGGAAAGAAGAAAGCTAGCTGACAGCA	61	97
NM_001106472.1	Rattus norvegicus dickkopf WNT signaling pathway inhibitor 2 (Dkk2), mRNA	3087	AT	TA	ATTGGAATGGGGAAGAATGAGGAATGTGGTAAGAATGTGGAGCAGAAGAGGGCAGGACTGAAATAAGTAGAGACAGTGACAGCCAAAGCACTACCAGTGTTTCCATTGTGCACCTCGTCTGTGTAAATAATGTACACATTTGTGAAAATGCTATTA	156	192
NM_001109544.1	Rattus norvegicus programmed cell death 2-like (Pdcd2l), mRNA	1253	GC	AT	GCCCGCGGTGTGACCGCTGCGCACAGCCGCTCGCGCTCGTCGTGCAGGTGTACTGCCCGCTGGAAGGCTCCCCGTTCCATCGGCTTCTGTACGTTTTCGCCTGTGCCCGTCGGGACTGCAGCGACAACCAGACGCGCAGCTGGAAGGTGTTCCGCTCCCAGTGCCTGCAAGTGCCAGAGAAAGAGACTCGGAACGGACAGAATCAGAGTGAAGGCCTTGCCGCTGAGAACTGGTGTGAGGGCTCACATGACTGGGGAAGTGATACCGAGGAGACGCCTCCGCCACCACCCCCAGCAGATTTGGGAAGGGATTCTAATGATGCCAGAGCGCTAGACTGGACTGACAAGCTCCAAGCTCTTCACCTGCAGGATAGTGCCCTGGCTGTTGCCTGCCCTTCCC…	939	975
NM_001108898.1	Rattus norvegicus DEAD-box helicase 28 (Ddx28), mRNA	1931	GG	AC	GGACTGTTACCAGTTTTGTGACCCATCCCTGGGATGTGAGCCTGGTTCAGAAAATTGAACTGGCAGCTCGTAGAAGGAGAAGCCTTCCAGGACTAACATCTTCAGTGAGGGACCCATTGCCTCAACAAGACTGACTTTTTTGGCTGAC	148	184
NM_199507.1	Rattus norvegicus protocadherin alpha 7 (Pcdha7), mRNA	5211	AA	TT	AATATCAGCTCATAGAAAGTAATAAAATTTGCTGTTACCATAAATAAGACATT	53	89
NM_001126095.1	Rattus norvegicus signal recognition particle 9 (Srp9), mRNA	1328	GG	AG	GGCTGACCAATGGCGCAAGCGCTAGTGCGCCTCCATCTTTGGGCCGCCAGAGTCCAGCGCTGTGGGCGGTTGCGGGAGAGCGGTGGGCTGTCAGTGCGACAGCGCGTTTCTTGCTTCGCGGCCTCGTTTCGCGCTGCCCGAAGCCGCGATGCCTCAGTTCCAGACCTGGGAGGAGTTCAGCCGCGCGGCTGAGAAGCTCTACTTGGCGGACCCCATGAAGGTACGTGTGGTTCTCAAGTACAGGCATGTTGATGGGAATTTGTGTATCAAAGTGACGGACGATCTAGTCTGTTTGGTGTACAGAACAGACCAAGCTCAAGATGTAAAGAAGATTGAGAAATTCCACAGTCAG	352	388
NM_001107830.1	Rattus norvegicus laminin subunit gamma 3 (Lamc3), mRNA	6512	AT	AC	ATAGAGGTGGTATGCAGAGAGCTTCTCTGCTGATCCCTGGTTCAGGGTGGAGACACTGAGACAGAGAACGGAAC	74	110
NM_001109405.1	Rattus norvegicus peroxisomal biogenesis factor 10 (Pex10), mRNA	1699	GA	GC	GAGAAGTTCCCACCCCAGAAGCTGGTCTACCTGAGGCACTACCGCTGACAGCTCTAAGAAGTGAATGGAAGCCCATGGACAAGTTTCTCAGAACTGTGGCTGCACAGAAACATAAAACCTCCACACTGCTCTTTTGTTGCATAAGCTACTACAGTTACCTGGAAAGAAAGGGAGTCAGGCGCAAGTGGGGAAAACTCAATTTGGGGGTAGGAGAGTTTGTTGCACGTAATCTATGGCTTCTTCAGTCTCTGGAGATAGTGGACTCCCCCCTCCCTTCCCAAGCCACACAGCTGAGAACTGCTTCAGAAGGTCAGGGTGTTTTACTCAGGTCTGTAAAGAGGCAGCCACCATTGGGCTGGGAGAGGCATGGCTCAGGTTAGGCTGGAAGCGAAGTGTAGA…	445	481
NM_001106106.1	Rattus norvegicus eukaryotic translation elongation factor 1 epsilon 1 (Eef1e1), mRNA	998	GG	TT	GGAATAAGTACAGCGCTCAGGGCGAACGACAGGTTCCAGTCCTACAAACAAACAATGGCCCCAGTCTAATGGGATTGAGCACCATTGCGACCCATCTGGTCAAGGAGGCCAACAAGGAGCACTTGCTGGGGAGCACTGCAGAAGAAAAGGCACTAGTTCAGCAGTGGTTAGAGTTCAGGATCACTCGAGTAGATGGACACTCCAGTAAAGAAGACACCCAGACTCTGCTGAAGGATCTCAACTCCTATCTGGAAGACAAAGTCTACCTTGCAGGACATAACACTACCCTGGCGGACATCCTCCTGTACTACGGGCTCCACCGCTTTATAGTTGACCTGACAGTTCAAGAAAAGGAGAAATATCTCAATGTGTCTCGCTGGTTTTGCCACATTCAACATT…	619	655
NM_001107233.1	Rattus norvegicus similar to human chromosome 5 open reading frame 52 (C14h5orf52), mRNA	2518	CT	AC	CTTTGGCTCCTCCCACTTGATGTCCCTGGAGCCTTGAGGATGGGAGGAGTTGTGTGTAATTGTATCTCTCTGGGTCAGCTACCTCATGGTCAATTGACCTCTGCATTTTTGACCAGTTGTGGCTTTTTATGTGTTTTGATAGCTGCCTATCTGTGTTCCATGTGCGTGCCTAGTGTCTGCAGAGGCCAGAGGCAGCATTGGGTTCTCTGACACTAGAC	218	254
NM_001001519.1	Rattus norvegicus lipocalin 6 (Lcn6), mRNA	742				0	-
NM_001109437.2	Rattus norvegicus debranching RNA lariats 1 (Dbr1), mRNA	1942	AG	CA	AGTGAATACAACACAGACACGTCTGCCCTGTCCTCCA	37	73
NM_001109325.1	Rattus norvegicus keratin associated protein 13-2 (Krtap13-2), mRNA	1145	CG	TT	CGTTTTCCATGCACCTGTTTCATCTTTTTAGTCTTTCAACATCAAAGTCACAGTCTCTACGTCCTTTGGCTGTTGTTTTTGTTCTTATTCCTTACCATTGTCTTGTCAACTGTCCATCAACCACTTCTTTCGTCCTCAACCTCTGGCAGATTCTCGGATTCAAGATAACTCAAAAAAAATATGCTTTCCTGTGTGTGCTCTCAAATATATATTTGGCTCTCATCTAAAAAATGAAAATT	239	275
NM_001109232.2	Rattus norvegicus coiled-coil domain containing 126 (Ccdc126), mRNA	2289	TA	TC	TAACAACCAACAAAAGGACGAGTGTTTCGGGCAGCGTCAGATAGCAACGAAGGCCACCTTGCATGGCAACACCACTGTGGATTACATCCTTCGCAGGACACCTC	104	140
NM_001031645.1	Rattus norvegicus acid phosphatase 6, lysophosphatidic (Acp6), mRNA	1336	CA	TT	CACTGAAGAGATTTGCCCAGCTGATTGAGCAGAGAGCTGTGGACATGGCCTTGTACATGCTGCAACAGGAAGACAGGGAAAGTATCCAGATGGCCGTGGGCCCATTCCTCTACATCCTGGAGGGAAACCTGCTCAAAGCTGTGGACCCTTCCACCCCACCCAGCAAGACCAGGAAGATGTACCTCTATGCAACGCACGATGTAACCCTCCTGCCTATGCTGTTGGCCTTGGGGATTTTTGACAACAAGTGGCCCCCGTTTGCTGTTGACCTGACCGTGGAACTCTACCAGCACCAAGAATCTAAGGAGTGGTTTGTGCGGCTCTCCTACAACGGGCAGGAGCAAGTACCAAGAGGCTGCCCCGACAAGCTCTGTCCACTGGACAAGTTCTTGAACACCA…	501	537
NM_001127657.2	Rattus norvegicus spindlin family member 2A (Spin2a), mRNA	1370	TA	AG	TATTGTACATGTATCAGCTTCTGGATGATTATAAAGAGGGTGACCTCCGTATCATGCCAGAGTCCAGTGCATCTCCTCCAGCAGACAGGGAGCCAGAAGGAGTTGTAGATGGCCTGATAGGTAAACATGTGGAATATACCAAAGAAGATGGCTCCAAGAGGACAGGCAAGGTCATTCACCAAG	183	219
NM_001113183.1	Rattus norvegicus testis expressed basic protein 1 (Tsbp1), mRNA	1587	AA	TA	AAGATGGCAGACCTCGAAATAGTTTTGGCTGTCATCCTGACTGTATTGGCCCTTGCTATTCTGGCTATTCTGATAGCAAGATGGACGCGGCGCAGACATGAGGCGCGAGTCTCCAGATACACTTCAGAACAGAGTGCTGGGCTTCTGGATCATGAGGATGGTATTTCCCATGGGAGGCACAAAAGAGGAAGAGGATCTCGATGCTCGTTTTCATCGGATAGCGCTGGAACCATTGGACCTATAATGCAGTTCTCCGCACCTATCCCTGGAGCTACGGGACCTATCAAACTGTCTCAAAAAACCTTCCTGCAAACTCCTGGCCCTCTTGTGCAATGTATGGATTCTAGTGAAAGCTGCAGCCCTGAGGGATCCAACGCTGTAATGCCCATGGAAATGTGT…	507	543
NM_001134604.1	Rattus norvegicus cytokine like 1 (Cytl1), mRNA	1874	AT	TG	ATGTACATTCCATCCAAACTGGGTCCGACATTCAGTTTTCTCACTGGCTTCTCTCTGCTG	60	96
NM_001037787.1	Rattus norvegicus RNA polymerase I and III subunit D (Polr1d), mRNA	856	GA	TG	GAGGTGGCGGGCTCTGACATCCGAAAGTGACTTCCTCAGTGGGTCCTTTGTTTTACGGTGTCTCTTGGTACTGTGTTGTTGTTCTTGTTGCTCTTG	96	132
NM_001106864.1	Rattus norvegicus lactotransferrin (Ltf), mRNA	2761	GG	TT	GGCCTTCTGACCGTCCTCGGGACTCCCTGCTGTCACTTATGTAGAAATAAAATGAAGCAATGTTGGTTTTCACGTCATATGAAGTGTCACTCATCATATCAAGTGTCACTCATCGCATGAAGTGTCACTCATCGCTCCTTGAAGTTTACACGGAAATCCTGTGTCTGACCACATGCTTGCACACTTGGACTTTCTTCTGGAGTTTCTAGGTCCAGCCATTCCTTTATCCTGAAGTTCCAGGCGTGACGCCCAGTGACCTGGAATCTGGGGAAAACCAAGGGACGTTTCTTTCCCTGGGGGATCTGGTTTCTTCACATAGAGATCACAGTGCATATGTGTGTCCTGGCTCATGTGTGTGTATGGGTGAACATGTATGCCTCAGCATGTTGCGTATAGACT…	510	546
NM_001168343.1	Rattus norvegicus RT1 class Ib, locus M4 (RT1-M4), mRNA	1026				0	-
NM_001109283.1	Rattus norvegicus family with sequence similarity 174 member C (Fam174c), mRNA	679				0	-
NM_001037659.1	Rattus norvegicus MAGUK p55 scaffold protein 1 (Mpp1), mRNA	2157				0	-
NM_001126100.1	Rattus norvegicus NOP10 ribonucleoprotein (Nop10), mRNA	858	TT	TA	TTA	3	39
NM_001135801.1	Rattus norvegicus DEAD-box helicase 27 (Ddx27), mRNA	2608	AG	CT	AGTTCAAATCCCAGCAACCACATGGTGGCTCACAACCATCTGTAATGGGATCTGATGCCCTCTTCTGATGTGTCTGAAGACAGCTACCATGTACATACGTACATAAATAAAATCT	115	151
NM_001127563.1	Rattus norvegicus cilia and flagella associated protein 77 (Cfap77), mRNA	1739	CG	CT	CGACAGAAGGAGCCGCCCTCCATCCCTCCCAACATGACCTTTGGCATCCGTTCACGGCCCTCAACACCCTTCTTTGACCTGTTACAACATCGGTACCAGCAGCTATGGATACAGGAGCAGAAGGCCACTCAGCAAGCCATCAAAATGGAGAAGAAACAGAAGGTAATCCTGGGAAAGCTGTATGAGACGAGGAGCAGTCAGCTGAGGAAGTACAAGCCTCCTGTGAAGCTGGATACTCTCTGGCACATGCCTCACTTCAAGAAGGCGGTTTCCCATCTTGATACGTTCCCTACGGATGCCGCTCGCCAGAGGGCTCTCAAAGCCCACAAGGAAGAGCATGCTGTACGCCAGGGCACCCTACGAATGGGCAACTACACCCACCCCTAGCCTCCTCACAGG…	778	814
NM_001109318.1	Rattus norvegicus TLR adaptor interacting with endolysosomal SLC15A4 (Tasl), mRNA	1558	TA	CA	TATTTGAAAGTCCGACCTTAGCCGCAGTTGGCATATGCAGAGATGTGATCAGGGAAACCTACCTGGTTCCACCTTCTTGTAAAAGTATTTGCAAAAATTACAATGACTTACATATTGCAGGGGGGCAGGTGATGGCCA	138	174
NM_001106149.1	Rattus norvegicus similar to human chromosome 5 open reading frame 46 (C18h5orf46), mRNA	784				0	-
NM_001109433.1	Rattus norvegicus stromal cell-derived factor 2-like 1 (Sdf2l1), mRNA	1064	AT	GA	ATGGGAAGGGAGGGTGGCTGAGTGGGAATCCGCAGGGCTGCTCTTGTGTAAGACTCTGTAGGGGCCCTCAAGTGCCTTTCTGA	83	119
NM_001109317.1	Rattus norvegicus transmembrane protein 47 (Tmem47), mRNA	4130	CC	AT	CCTGGGTCACCGCGGACCACCAGTACTACCTGTCCCTGTGGGAGTCCTGCAGGAAGCCCGCCAACCTGGATAGCTGGCATTGCGAGTCCACGCTCGGCAGCGATTGGCAGATCGCTACTCTGGCTTTACTCCTGGGCGGCGCTGCCATCATACTCATTGCATTCCTGGTGGGTTTGATTTCAATCTGTGTGGGATCTCGAAGGCGCTTCTACCGACCTGTTGCTGTCATGCTTTTTGCAGCAGTTGTTTTGCAGGTCTGCAGCCTGGTCCTTTATCCAATCAAGTTTATTGAAACTGTGAGCTTGAAAATTTACCACGAGTTCAATTGGGGTTATGGCCTGGCCTGGGGGGCAACTATATTTTCATTTGGGGGTGCCATTCTTTATTGCCTGAACCCTA…	678	714
NM_001037524.1	Rattus norvegicus defensin beta 52 (Defb52), mRNA	382				0	-
NM_001106942.1	Rattus norvegicus caudal type homeo box 4 (Cdx4), mRNA	1615	AG	TA	AGAACTGCCTAATGCTTTCTTCACCACTCCATCTGCTGTCCGTGGGTTTCAGCCAATTGAGATACAGCAGGTCATAATTTCTGAATGAAACGGGAGCAGAGAAACCAACGCATCCTTCCTGTTACAGTGTCTCTTTGGCCTCTAAGATAACAGCAGGGCAGTTGAGATCGGATATACTTCCTTATAAGGCACAATTCCAAACAAGTAGACACACCATGAGTTGGAGATATTTCAGAAGACTCTAATA	247	283
NM_001108695.1	Rattus norvegicus THAP domain containing 3 (Thap3), mRNA	1198				0	-
NM_001008952.1	Rattus norvegicus vomeronasal 1 receptor 27 (Vom1r27), mRNA	918				0	-
NM_001109068.1	Rattus norvegicus peptidase M20 domain containing 1 (Pm20d1), mRNA	3790	TT	GT	TTTGTGGTGTCATGTTCTTGGAAACAGAAAACAAGAGTAGCACAATTTGAATGCACTATCACTCCATTTTGTAAAAAGGAAGTGCCAGGT	90	126
NM_001128195.1	Rattus norvegicus BAG cochaperone 2 (Bag2), mRNA	1572	CA	GT	CATCCCTCCAGTGCTGACTGCCTTGAGCCCACATGTGTGGCAGGAGCACTCACCCGACCACTTCTCTGGACAGCTGGTGGTTTCGATCTGTCGCTATGACTACAACATACCTATGTCGGTTGAGCTTTACTGTTCTTGGTCTTCTTTGT	149	185
NM_001106917.1	Rattus norvegicus peptidase inhibitor 15 (Pi15), mRNA	1359				0	-
NM_001106764.1	Rattus norvegicus microrchidia 2B (Morc2b), mRNA	3714	AT	TG	ATCCACCTG	9	45
NM_001109205.1	Rattus norvegicus EP300 interacting inhibitor of differentiation 1 (Eid1), mRNA	1720	TG	TG	TGATGCCCTGGATGGCGGGTTTCAGGCGCGCTGCGAGAAGAGCCCTTTCGACCAGCTAGCTTTTATCGAAGAGCTGTTTTCGCTGATGGTTGTCAATCGACTGACCGAAGAGCTCGGTTGTGATGAGATCATTGATCGAGAGTAAATGCTGATGAAAGAGGAGGAAACTACCTGAGAGGGAGAGATTCAACATTCTGCTATTTTGGGGTTCATTCCAAATAGTTCTGTGCAAAAAATAAAAACAGTTGGTTTTTGTTTCTCGGAATAGAAGACAGGACAGTGAATGAATAACCGTGCATTGTGGAAAAGGAGAATCAAGAAAGGAGGAGTG	331	367
NM_001013955.1	Rattus norvegicus tripartite motif-containing 42 (Trim42), mRNA	2513				0	-
NM_001037774.1	Rattus norvegicus claudin 8 (Cldn8), mRNA	2285	CT	TC	CTTGGTTGTGCTCATCCCTGTCAGCTGGGTTGCCAATGCCATCATCAGAGACTTCTACAACCCGCTGGTGGATGTGGCCCAAAAGCGCGAGCTTGGTGAAGCCCTCTACATAGGCTGGACCACGGCGCTGGTGCTGATCGCTGGAGGAGCACTGTTCTGTTGCGTGTTTTGCTGTACTGAAAGGAGTAACAGTTACAAGTACTCGGTACCATCCCATCGCACCACTCAGAGGAGTTTCCACGCCGAAAAGAGATCCCCGAGCATATACTCCAAAAGTCAGTATGTGTAGCTGTGTGTGTATATTTTAGCTGTAGCTATAAAGCGAAGCTTTATAAATCACTGAACCAGCCACTATTTTATAGAAATGGAACCCACAGTGTTTCCATTTACCTTTC	395	431
NM_001012476.2	Rattus norvegicus ribonuclease A family member 11 (Rnase11), mRNA	1503	AG	TT	AGATGTCTCAGCATCCACAGTTCCAGCATTGTACAACCTGCATTCACCCGCCACTGTTCCTATCTCAGGACTGCTGCAGAGAGGAAATGGAGCTCTTGTCACAGCCAGGCAACGTCTTGCTACTCTAGAGCTGTTCCCGAGGAGGGGGCAAACCATGGGAAATACGGAAAGTAGTGTTGGAGGTGTCAAGTTTACAACACTTTTCAAGCAGGGTTATCTTCAATCTCGATGCTCTCTGTACCAGTCGTAAGCCCTCAGAGTCAACAGTGCGTGAAGCACAGACTTTTACTGCGATGTTACTCATTGTTGTGCAAATGTATGCGCCCCGTTTGCCCTCTGATGTCTTTCCCTCACCGCAGAACAACTAACTCCCTTT	376	412
NM_001129878.1	Rattus norvegicus homeobox A11 (Hoxa11), mRNA	2253	AG	TT	AGAATGATTTGGAGTTATT	19	55
NM_001108586.1	Rattus norvegicus reticulocalbin 1 (Rcn1), mRNA	3073	GT	TT	GTCTGTTTTT	10	46
NM_001109462.1	Rattus norvegicus TAL bHLH transcription factor 2 (Tal2), mRNA	1170	GT	CT	GTTTCTTCCCCTGGCCCAAGCCATGGCGCTCCCTAGGGTGGCTGTGACAGTCAGTCCTCAGGGCAGCACTAGTTAGAGTCACGTGGTGTCATGCTGTGGAGAGGTATGACTCAGGGAGTGACTGGGACAGCAGCTGAGAGCTGAAAGGAGACTTGAGCAATATTGCTCTGGTCCCATTATCCCAGAACTTCAGGCAGGCCGCCGAACGTTTCTAAAACAAAACAAAACAGAAACACAGAGAAACAAAACAGCCATAACT	259	295
NM_001099647.1	Rattus norvegicus ABRA C-terminal like (Abracl), mRNA	704				0	-
NM_001109252.1	Rattus norvegicus TatD DNase domain containing 2 (Tatdn2), mRNA	2875				0	-
NM_001047871.1	Rattus norvegicus interferon-related developmental regulator 2 (Ifrd2), mRNA	1977	AG	TT	AGTCGTGCAAGGGACAAGCGGGCGGATATCTTGTGAAGTAGATTGGCCAACGAGAAGGCTACCCATACCCCTACCATATTT	81	117
NM_001100967.1	Rattus norvegicus nyctalopin (Nyx), mRNA	1971	CC	GA	CCAGGACCTCAGCCAGGTGGTCTTTGAGCGCTCCTCTGATGGCATCTGTGTGGACCCTGATGAGCTGAACTTCACCACGTTCAGTCCAGGCCCGAGTCCAGAGCCAGTGGCCACCACTGTGAGCAGATTCAGCAGCCTCCTCTCCAAGCTGCTGGCCCCAAGGGCCCCTGTGGAGGAGGTAGCCAACACCACCTGGGAGCTGGTCAATGTCTCCTTGAATGACAGTTTTCGGTCCCATGGAGTGATGGTCATGTGCTACAAGGCCACGTTTCTCTTCACTTCTTGCCTCTGGCTCAGCCTGGCCCAGTATGTGGTGTTGGGTCCACAGAGGGACTGACTGCCACACTGAAGTGACCCAAACCACTTTGGCCAAAAGGGGGAAGGTTTGCCTGGTGTGTC…	437	473
NM_001107256.2	Rattus norvegicus suppressor of cytokine signaling 4 (Socs4), mRNA	2037	AC	TT	ACTTTCCCCTTTTCCTTGCAGCACATTTGCAGGACAGTTATTTGTAACTGTACAACGTACGATGGCATCGATGCCCTTCCAATTCCTTCTCCTATGAAATTGTACCTGAAGGAATACCATTACAAATCAAAAGTTAGGCTACTCAGGATTGACGTGCCAGAGCCACAGTGACGTGGAGAGGTTAGAATGTCCACCCGCGAACATAGGTTCATTCAATAGTTCATTTTTCTTATGCCTCTTTGAATTTTTGTACAAAGGCAGTTGGAATCCAAAATAAAACCGTGCCCTAAGTT	293	329
NM_001109110.1	Rattus norvegicus annexin A10 (Anxa10), mRNA	1342	TG	TA	TGATGTGGAAGACTA	15	51
NM_133566.1	Rattus norvegicus cystatin E/M (Cst6), mRNA	836				0	-
NM_001109188.1	Rattus norvegicus late cornified envelope 1F (Lce1f), mRNA	667				0	-
NM_001108224.2	Rattus norvegicus villin 1 (Vil1), mRNA	3376	AA	TC	AAACAGAGACCCTGAGACCCCTATCATTGTGGTGAAGCAGGGGCACGAGCCCTCCACCTTCACAGGCTGGTTCCTGGCTTGGGATCCCTTCAAGTGGAGTAACACCAAATCTTATGATGACCTCAAGGCCGAGTTGGGAAACTCTGGGGACTGGAGCCAGATTGCTGATGAGGTTATGAGCCCCAAAGTGGATGTTTTCACTGCCAATACCAGCTTCAGTTCTGGGCCCTTGCCCATCTATCCCCTGGAGCAGCTGGTAAACAAGCCTGTGGAGGAGCTCCCTGAGGGTGTGGACCCCACCAGGAAGGAGGAGCACCTGTCCACTGAAGATTTCACTAAGGCTTTGGGGATGACTCCAGCTGCCTTCTCTGCGCTGCCTCGATGGAAGCAACAAAACCT…	989	1025
NM_001109187.1	Rattus norvegicus S100 calcium binding protein A7 like 2 (S100a7l2), mRNA	470				0	-
NM_001108876.1	Rattus norvegicus LSM1 homolog, mRNA degradation associated (Lsm1), mRNA	1216	GG	GT	GGTCTCTCCATTCCTCGTGCAGACACTCTGGATGAGTACTGAGTCCTTGCTTAGAGACTGCTTCAGAGAGCAGGTGCTGTCACCTGGTCACCTCACATCTGACCAGAGTATCACACTGAAAAGTGATCTTATTCTTTCACAGATGCCAACATGAAGAAATCATGGGATTTGTTTTGTTTTTGTTTGTTTTTTTTACACAATCATTGTATATTAGTTTTGCCTTTTTCTTCAAACAGTCTCAACACATAGTCCTGGCTGACCTAGAACTCACTATGTAAACCAGGATGCCCTCTAGCTTGTGGGATTTCAGGTGGGCTCTACCATCCCAGCTTTGCTGT	338	374
NM_001108058.1	Rattus norvegicus sperm acrosome associated 5 (Spaca5), mRNA	553	CA	GT	CACTGTGCTGGTCATGATTTATCTGAATGGCTCAAGGGGTGTGATGTGCCTCTGAAAGCTGACTCAAACTATGATGACTGGTGACTCAGATTTTATAAAGATAGAAATTCCATTTTATCTTTTGTGGGT	129	165
NM_001107112.1	Rattus norvegicus claudin 17 (Cldn17), mRNA	1177	TA	TT	TACTGGAAGCAGCGCGTGCACTCATGTGTGTGGCCATGGCTCTTTCCTTGGTCGCTCTCATTATCGGCATCTGCGGCATGAAACAGATTGAGTGCACCAGCTCCAGTGAGAGGGTCAAAGCCTACTTGCTGGGAACGTCAGGAGTACTCTTTATTGTGACTGGTATCTTCGTTCTGATTCCAGTGTCCTGGACCGCCAATATCATCATCCGAGATTTCTACGACCCAACCATCCACGCAGGGCAGAAGCGGGAACTTGGAGGAGCTCTCTTCCTTGGCTGGGCAACCGCTGCTGTCCTCTTCATTGCAGGCGGGCTGCTCTGTGGATACTGCTGCTGCAACAGGAAGGAACAGTGGCATGGATACCCAGTCTCTGCCTACCGCGTGCCACCAAAAGACA…	540	576
NM_001025404.1	Rattus norvegicus CEA cell adhesion molecule 11 (Ceacam11), mRNA	971	CA	TT	CATACAGTAGTAGAGAGACAATACTACGCAATGGATCTCTGATGATCAAAAGTGTCAACAAAAAAGACTCAGGATACTACACGCTAAAAATACTTAGTACAACCTCAAGTTCTGAAATAATACATGCAGAATTCTTTGTACACAGTCCACTTTTAGGCTACAAGACACATCGTACTCCTTCTCAAATGACAATTGAATTGTCACAATCTAGAGTTTTTGAAACTGACCATATTATTCTGGTGGGTTATAATCTGCCAGAGAAGATTCTAGGCTTTGCTTGGCATAAAGGAGTGCTTCCACTTGATCGTT	309	345
NM_001108961.1	Rattus norvegicus cystatin D (Cst5), mRNA	742				0	-
NM_001039588.1	Rattus norvegicus autogenous vein graft remodeling associated protein 1 (Avgr1), mRNA	2182				0	-
NM_001271222.1	Rattus norvegicus splicing factor 3B, subunit 6 (Sf3b6), mRNA	711	GC	TA	GCATTCCAGAAGATGGACACCAAGAAGAAGGAGGAGCAGCTGAAGCTTCTCAAGGAAAAGTATGGCATCAACACAGATCCCCCCAAATGAGTAACAGCCATGTGTGGTCTTGGTTACCCTTCTCTTTTTTA	131	167
NM_001126083.1	Rattus norvegicus CDC28 protein kinase regulatory subunit 2 (Cks2), mRNA	640	CA	AT	CATGTCATGTTACCCAGAGAACTTTCTAAACAAGTACCCAAAACTCATCTGATGTCCGAAGAGGAGTGGAGGAGACTTGGTGTTCAACAGAGTCTAGGATGGGTTCATTACATGATCCATGAGCCAGAACCGCATATTCTTCTCTTTAGACGGCCTCTTCCAAAAGAACAACAAAAATGAAGTACAGCTGGGATCATCTAATAATCTTTTTCAAAT	216	252
NM_001109439.1	Rattus norvegicus hypothetical protein LOC681325 (LOC681325), mRNA	2717	CT	GC	CTGCTTTGTGGAACACATACATGATGATGTTTGCAATGGTCCTCTTTTACTTTCCGTGGACATACCATTGGGACACTCTGCTAAAATTGAACCTCTAGAGAAAACATCTAACTCAAAAGTAGTCAATGGTGATGAAATTCGAGAAAAAAGCATGCTATTACATAAGCAACCTCTCTCTAATTCTATGC	188	224
NM_001108111.1	Rattus norvegicus Wnt family member 10B (Wnt10b), mRNA	2234	CA	GG	CAGACGCGAGTGGAGCGCTGCCACTGTCGTTTCCACTGGTGCTGTTACGTGCTGTGTGATGAGTGTAAAGTCACAGAGTGGGTCAACGTGTGTAAGTGAAGGTGAGCCTTTCCTAGGGAGGAGGAGGAGCACTGTGTGGGGGGCTGCTCTCTTCCAGCTCTTTGCTCGGATTTCGG	176	212
NM_001106111.1	Rattus norvegicus acyl-CoA thioesterase 13 (Acot13), mRNA	743	AG	AA	AGTCAGTATTGACATGAACATAACGTACATGTCACCTGCTAAGATCGGAGAAGAAATAGTGATCACAGCACATATTCTGAAGCAAGGAAGAACGCTGGCATTTGCCTCAGTGGATCTGACCAACAAGGCCACAGGAAAA	139	175
NM_001109639.1	Rattus norvegicus carbohydrate sulfotransferase 14 (Chst14), mRNA	2058	TT	AT	TTCCCAGCTCGCCAGGCCTGGTACCGTCCAGCCAGCCCAGAAAGTCTACATTACCACCTGTGCAATGCCCCGCGGGCCCTGCTTCAAGATGTGCTACCTAAGTATATCCTAGACTTCTCCCTCTTTGCTTACCCACTGCCCAATGTCACCAAGGAAGCCTGTCGCTAGTGACAGTGGGCCAGCACCTTTTGGAGTTTGGAT	201	237
NM_001109599.1	Rattus norvegicus POU class 2 homeobox associating factor 1 (Pou2af1), mRNA	2527	CC	AT	CCACTCTTCAACCCTTGGCTCCATGGACGCCCTACACGGAGTATGTGTCCCATGAAGCTGTCAGCTGCCCTTACTCCGCTGACATGTATGTGCAGCCTGTGTGCCCCAGCTATACAGTGGTGGGACCCTCCTCGGTATTGACCTATGCCTCCCCACCACTCATCACTAACGTCACGCCAAGAAGCACGGCTACACCCGCAGTGGGGCCGCAGCTGGAGGGCCCAGAGCACCAGGCGCCCCTTACCTATTTCCCGTGGCCTCAGCCCCTTTCCACACTGCCCACCTCCAGTCTGCAGTATCAACCTCCAGCCCCAACCCTGTCTGGGCCCCAGTTTGTCCAGCTCCCCATTTCTATCCCAGAGCCAGTCCTTCAGGACATGGATGACCCCAGAAGGGCCA…	533	569
NM_001024989.1	Rattus norvegicus three prime repair exonuclease 1 (Trex1), mRNA	1101	CC	AC	CCCTTTAGCACCATCAAGCCCATGTATGGCATGGCAGCTACTACTGGAACGGCCAGCCCAAGGCTGTGTGCTGCCACAACCTCCTCACCCCTGGCCACAGCCAAC	105	141
NM_001115031.1	Rattus norvegicus cerberus 1, DAN family BMP antagonist (Cer1), mRNA	1746	AG	GC	AGAAGGGGCACATCCCCACAACTTCTGCTCCCACTGCTCACCCACCAAATTCACCACCACGCACTTGAGACTGAACTGCACCAGCCCAACCCCCGTGGTCAAGATGGTGATACAAGTGGAAGAATGTCAGTGCATGGTGAAGACGGAACATGGAGAGGAGCGTCGCCTACTGGCTGGTTCCCAGGATTCCTTCATCTCTGGACTCCCAGC	210	246
NM_001135174.1	Rattus norvegicus translocase of outer mitochondrial membrane 7 (Tomm7), mRNA; nuclear gene for mitochondrial product	424	CT	TT	CTGGATGAGAAAGGAGACGTCATTTCAACACATCTGAGGCAGAGTGGAGTCTGTACTGACTTACGATAGACTATCAAAATAAATATTT	88	124
NM_001109364.1	Rattus norvegicus sosondowah ankyrin repeat domain family member C (Sowahc), mRNA	4467	AT	TT	ATAGCATTCTGGGGCAAGAAAATGTCTCTGAAGTGATTCATAATGCACTGATTTGTGCCTCTCTCCCGCCCCACCCTTGTAACCTGGAACTTGTGAGAACTGGAATTATTGATGACTAAGAGTCCCTTTGCTTT	134	170
NM_001109090.1	Rattus norvegicus SEC14-like lipid binding 4 (Sec14l4), mRNA	2920	GT	GC	GTAGCCCCTAGGTACTGTATCTGGACCAGGTGAACCTTTCACAGTCAAAGTTTAGAGTCTGAACGGGGAGCTAAATGCCAAGAGGCAGTGCCAGGAGAAATTCCTGCCTAAGACCAGC	118	154
NM_001416371.1	Rattus norvegicus tenascin XB (Tnxb), mRNA	13616				0	-
NM_001014210.1	Rattus norvegicus TBC1 domain family, member 21 (Tbc1d21), mRNA	1249	GA	CA	GATGAGCGGCTCATGGTGGACAGCAACAGAAGGAGGAACTATAACTCCTTGTGCCAGATGTATGAGAAAATCCAGCCCCTGCTGGAAAATTTACATGGGAACTTCACGGAGACTCGGAACAACATCGTGTACGATATTCAGAAGCTGTATGATAAAGATCCCCTGGGCAATGTGCTTGTAGACAAGAAGAAACTGGAGAAGACCCTGCTGCTGAGTTATGTCTGCAATACAAAGGCTGAGTACCAGCGAGGCTTCCACGAGATGGTGATGCTTTTCCAGCTGATGGTAGAGCACGACCATGAGACCTTCTGGCTATTCCAGTTTTTCCTGCAGAAAACAGAGCACAGTTGTGTCATCAACATCGGTGTAGGCAAGAACCTGGACATGCTCAACAACCTG…	750	786
NM_001017499.1	Rattus norvegicus sec1 family domain containing 2 (Scfd2), mRNA	2360	TT	AC	TTACTAATTATAGGTATGAC	20	56
NM_213561.3	Rattus norvegicus transcription factor 19 (Tcf19), mRNA	1616	GG	AG	GGCACCTTTCAGTCCTGATGGAGCCCAGGAAGAAGCTGCGTTTGGAGAAAACGGCTCTGATATCCAGTGGGGAATGACCACAGGGAGAGGTCCACTGCTAGAGAAGACTGACTCAAGGCTGGAGAGCACTATGGCTGAAGTGACAGGAAAAAGAGCTGCAGCCTCCAAG	169	205
NM_053805.1	Rattus norvegicus snail family transcriptional repressor 1 (Snai1), mRNA	1623	GG	TT	GGAGAAAGATGTTTACATT	19	55
NM_201422.1	Rattus norvegicus protocadherin alpha subfamily C, 2 (Pcdhac2), mRNA	5418	AA	TT	AATATCAGCTCATAGAAAGTAATAAAATTTGCTGTTACCATAAATAAGACATT	53	89
NM_001012132.1	Rattus norvegicus heat shock transcription factor, Y linked 2 (Hsfy2), mRNA	1434	TG	AT	TGACCCTTGGTGTGACAACAACACAGGTCAGAAGGACTCAGAGTTATGGGCTATTATTGAGGAAAGTGCATTCCAGGTTTTGGCTCAGCGATTCTTGATAAAGAGGCCGCCTCATACCCTCTGTGCCTCAGAGCCAGATGAAGACAGTAACTTATTTTCAATGACCTTCCCCAGAAAACTGTGGAAAATAGTGGGAAGTGACAAAT	206	242
NM_001109277.1	Rattus norvegicus a disintegrin and metallopeptidase domain 4-like 1 (Adam4l1), mRNA	2464	AA	AT	AAATGGGACTCGTAGTGGATGGTGCAACCTGTGGCCCAGGGAAATATTGTAGAGGACAAAGATGTGTTTTTCATCAAACTATGGGAT	87	123
NM_001398700.1	Rattus norvegicus VHL binding protein 1 (Vbp1), mRNA	762	TT	GT	T	1	37
NM_001108609.1	Rattus norvegicus par-6 family cell polarity regulator beta (Pard6b), mRNA	3294	AT	AA	ATGTCGAGCCTCACTGTGAATTCTGTTCTGTCCTCAGTCATCAACTCTGTCAACCAGATGCTGTGCTGTTGTGAACCGTGAATTTTCTAA	90	126
NM_001012473.1	Rattus norvegicus RNA polymerase II subunit C (Polr2c), mRNA	1188	AT	TT	ATTCCAGGCCCTGGGGCCCTTCTGGTTTCTGGGCTAAGGACTGCGCTTGCTCACGTTGCCTCCTGGAAGGACATCGGAGAGATGGCCAGGGGTTCCACTGGTGTTAGACAAGGCAGGTTTTATAGGGGTTTAGCATCCCTGGCCCTACATAGTGGTTTTCAGGCAGCCTAGGGGGAAGCACACACTAGTACAGAAAAGGAGTATTTATTGATCAACAGTAGCTGTCTTT	229	265
NM_001108090.1	Rattus norvegicus coiled-coil domain containing 59 (Ccdc59), mRNA	1539	AG	CT	AGGATTTGCGGCGCGTGGGGAAGGGACTCCTCAGGTCAGATTCGGAAATCAGAATGGGAAACGCAGGACCTGGCGGCCGAACCACCAGCAAGCCTTCCTAGGGAGCGTGCGCGAGGGACAGGGTTTTGCATTTCGGAGAAAACTGAAGATCCAGCAAAATTACAAGAAATTGCTGTGGAAGGTAAAGAAGGCACCAGCATCACAGGGATCCCAGTTCGAAGATCATTACCCAGAGCATCTGAAACACCTGTATCTAGCTGAGGAAGAAAGACTCAGAAAACAGCAAAGGAAGGTGGACCTTGCTCTGTCAGAAGGACAACTTGACCAGCCTTTGCCTGAAGAGGAAGGCAACACTGAGCAGGCTGTGTCTGAAGAACAGTCGAGTGTTTTCCAGCCTCA…	701	737
NM_022256.2	Rattus norvegicus betacellulin (Btc), mRNA	611	TG	GC	TGTGAGCAGGTGGACCTGTTTTATCTCCAGCAGGACAGGGGGCAGATCCTGGTGGTCTGCTTGATAGGCGTCATGGTGCTGTTCATCATTTTAGTCATTGGCGTCTGCACCTGCTGTCATCCTCTTCGGAAACATCGCAAAAAGAAGAAGGAAGAGAAAATGGAAACTTTGAGTAAAGATAAAACTCCCATAAGTGAAGATATTCAAGAGACCAATATTGC	221	257
NM_001109564.1	Rattus norvegicus protein phosphatase 1, regulatory subunit 3D (Ppp1r3d), mRNA	3072	AG	TT	AGGGTCATGGCAACTCTGTCCCTGGCCCCTGTCCAGAGTGCAAGAGAATGGGCCAGACTCAAGTCAAAGTCAGGAGCACCGATGCTCGAGAGTTCGTAGAGAGTTTTACAGTCCATGGGAACGCCTCTCGCTTGTCCGCAGGTTCTGGTTACAGAAAAGTAAAGGACGCATTATCAAAATCAAGAGAACCTGAAGGTGCCTT	202	238
NM_001126294.1	Rattus norvegicus DNA damage-induced apoptosis suppressor (Ddias), mRNA	3368	AA	AC	AAACTCACATATCCTTTAGAGACCTTTCGCGGGAGCCCAAAAAGCATATCAAAAGAAAAGCCTTATAGGCCTAGCAATAATAAC	84	120
NM_053942.1	Rattus norvegicus protocadherin alpha 8 (Pcdha8), mRNA	5247	AA	TT	AATATCAGCTCATAGAAAGTAATAAAATTTGCTGTTACCATAAATAAGACATT	53	89
NM_001127545.1	Rattus norvegicus ring finger protein 139 (Rnf139), mRNA	2723	GC	TT	GCTTGTATGATGTGCCTACATGCATATT	28	64
NM_001105787.1	Rattus norvegicus major facilitator superfamily domain containing 6-like (Mfsd6l), mRNA	2094	AA	CC	AACTCGTGTCCTGGACTGCAGGGAGCC	27	63
NM_001113750.1	Rattus norvegicus testis derived transcript-like (Tesl), mRNA	1468	AA	TC	AATTGCAGAGAGTAACATATAATAATTTTAGTTGGCATGCATCTTCAGAGTGCTTCCTGTGCTCCTGCTGCAGAAAGTGTCTTTTTGGACAGAAGTTCATGCCTGTAAATGGGCTGGTTTTCTGTTCCATGGAATGTAAGAAAATGATGTC	151	187
NM_001109103.1	Rattus norvegicus similar to human chromosome 8 open reading frame 74 (C15h8orf74), mRNA	1081	CG	GA	CGGCCTTAGAGGACTCTCCTAAGGCCAGTAAGGCCAATAAAGGAAAGAAAGCCAAAGCAAAGAAGTAGGAGGCTGGTGACTACCACTCAAGGACATGCAAGAAAAGCAGTATGGAGCTCAACATAGACCAGAGGCTCCTAGTGA	144	180
NM_001109357.1	Rattus norvegicus zinc finger protein 352 (Zfp352), mRNA	1845	AG	CC	AGAAGCCTCCTACCTTGAAGCGATACTCCTGTACCTACCAGGGTTGTGAGAAATCTTACACAAAGTCTCACCACCTCAAGGACCACATGAGGAAACACACTGGAGAGAAGCCTTTTGTGTGTGATCAGATTGGATGCAATTGGAAATTCTTCCGTTCAATAGATCTCAACAGGCACAAAAAAAAGCATAGTGGGGAGAGGCCCTATGCCTGTCCCAAGTGCAACAAAAACTATTCCAGACCTTATTACC	249	285
NM_001109276.1	Rattus norvegicus retinol dehydrogenase 14 (Rdh14), mRNA	1865	GG	CG	GGAGCTGCTACGCCTGGGGGCGCGGGTCATCATGGGATGTCGGGACCGCGCCCGAGCAGAGGAGGCAGCGGGTCAGCTCAGGCAGGAGCTTGGTCAGGCTGGGGGTCTCGGGCCCGATGCCACCGATGGCCAGCTGGTCG	140	176
NM_001106265.2	Rattus norvegicus p53 apoptosis effector related to PMP22 (Perp), mRNA	1890	GA	CC	GAGAAGACATATCAATGCCCCTCTCAGCC	29	65
NM_001106499.2	Rattus norvegicus VPS18 core subunit of CORVET and HOPS complexes (Vps18), mRNA	3880	GA	CA	GATCGAGCCATCAGCCCTCCAGATCCTAGGAGAGGAGGCACTTGTGGAGAGGGTGGTACTAAGGGTGGGCATGTGGACATGCTGTGTGACCCTGGGGCTCCAGTGTCAGGGTGCCCTGAGGCTGAGGACACACCAAGGACAAGAGGAAATAGCAACAAGCAGAGAGCA	168	204
NM_001108963.1	Rattus norvegicus solute carrier family 2 member 10 (Slc2a10), mRNA	3733	GA	AC	GATGTCTTCATGTAGGTCTGACAGAGACAGAGGCAGGTATATGTTTTCCAC	51	87
NM_001037515.1	Rattus norvegicus defensin beta 36 (Defb36), mRNA	329				0	-
NM_001130510.1	Rattus norvegicus DnaJ heat shock protein family (Hsp40) member B7 (Dnajb7), mRNA	1315	TG	CT	TGGAGGTGGAAGTCATCTTGATGATGAACGTGAGTACGGTTTCACATTCCGTAAGGCAGATGATGTCT	68	104
NM_001106849.2	Rattus norvegicus splA/ryanodine receptor domain and SOCS box containing 4 (Spsb4), mRNA	2802	GG	TT	GGACAGAGCTTATTCTTGGCTATGTTCATTGTCAGTAGTGTTTGCATTTTGAAAGAGGAGTGTGGCAAAGGTGGCTTTCTCCCAAAGGTGCTAAGGAAGAGGGGAGCCTCGTGACACCAAGTCTGAGACACCCTGAGTACCCAGGGCTCTGGTGGCCATCATCAGGGTGAAGCCTGGCTGTCACAAAGCTTTCTCTGAGCAAATTATTTTTTCACTGCAGGAGACTTCCAGTTTGTCTCTCGTTTCCAGCGCACGTGTGTGTGTGTGTGTGTGTGTGTGTGTGTGTGTGTGTGTGTGTGTGTGTACATGTATGTGTATGTATGTGTGTGTTGGTGTGTGTATGTGTATACATGTGTGTGTATGTATATGTGTGTGTGTTGGTGTGTATATGTGTGTGTG…	636	672
NM_001108921.1	Rattus norvegicus TBC1 domain family, member 10b (Tbc1d10b), mRNA	3728	AA	TC	AAAAAGAACCTGCTGTTCTATCTGGATCTGTCTCCTGCCTTGTTATTTGAAGAGTGCTATAGAGTAAGGGGGAAGGAGCCAGGAAGAAAGTCTGACTCTCCATAGGTTCAGTCTGCTGATCTTGGCAGGAACATCTAGACCACTGGTTCTCAACCTTCTTTTTTTTTTTTTTTGTTCTTTTTTTTCGGAGCTGGGGACCGAACCCAGGGCCTTGCGCTTCCTAGGTAAGCGCTCTACCACTGAGCTAAATCCCCAGCCCCTCTCAACCTTC	271	307
NM_001037135.1	Rattus norvegicus protocadherin gamma subfamily A, 10 (Pcdhga10), mRNA	4689	TT	GG		0	-
NM_001034938.1	Rattus norvegicus endonuclease G (Endog), mRNA; nuclear gene for mitochondrial product	929				0	-
NM_001108658.1	Rattus norvegicus TOP1 binding arginine/serine rich protein, E3 ubiquitin ligase (Topors), mRNA	3887	TG	TT	TGGTTATAACCATCGACAGTGACAGCGACGGGGATGCTGGAGTGAAGGCAAGTGTTGAGTGTAGCCAGAGCAGTCTTCCTCAGCCTGGACAGGATGAAGTCTCCACTCCATCCTCGGAAGCATTTGAAACTAAAGATGTCGTCACGATAGAGGATGAGCTTGCTGTCGAGGACAAGGAGTGCGATGTTACGGCACTTACTAATGACTTGAGTACCAGCCAAGCTGTGGAGAGCAGTGAGTCACCGCCAGTCTCAGTTGAACAGACTCTTGACGTACGAGAAGATAGCACCTTCGCCTCTGATGTGGAGAGCCAGTCCAGTAATGCGTCTATTCCCACCGAGCCATCAAGACCATTGCCATCTCCACGGACCTCATTATCCTCAGTGTCTCCTGGTAGAG…	529	565
NM_001106757.2	Rattus norvegicus complement factor properdin (Cfp), mRNA	1505				0	-
NM_001304268.1	Rattus norvegicus transmembrane protein 265 (Tmem265), mRNA	1178	AG	CT	AGACTCATTGTGGCCAGTTTTGCTGTCTGGTTTGCTGTCCTTTTTCTGGGTCCCCTGCTACTGTGGCTGCTCTCCTACACCATTGCTCAGGCTGAGTAGGCCTGGGTGGCCTTTGCTGAGAGACAGTCAAGACCTGGATCCAATCCAACAGTTCGGCAGTGCTCAGTTCTGGTGACAGGAGTGGTTCGTGGTCCTGTCTGGAAGGATGTTGCCCTTCTCGGGAGCCATTGGAAGAGCTCACCTAGGCTCT	250	286
NM_001106458.2	Rattus norvegicus BCAS2, pre-mRNA processing factor (Bcas2), mRNA	1083				0	-
NM_001109370.1	Rattus norvegicus diacylglycerol O-acyltransferase 2-like 6 (Dgat2l6), mRNA	1386				0	-
NM_001109513.1	Rattus norvegicus GrpE-like 2, mitochondrial (Grpel2), mRNA; nuclear gene for mitochondrial product	2028	GG	AC	GGGAATTAGTGTATCCTGTAGTCATCAGTGCCTGAGTACATGGTGGTACCACCAGAGGGCACTGTCGGCACTGAGGCCTTTGCGGACATTGACATCACAC	100	136
NM_001170428.1	Rattus norvegicus coiled-coil domain containing 185 (Ccdc185), mRNA	2057	AG	TG	AGAACCAGAGTGGGTGGACGATGCAACCTGACAAGCCAGAGAACCAAGGCCTAGACAAGATGGATAGGGTGCAAGTGCAGGCCGAGCACCTCAAACACTGTCAAGCGCAGAGTCTGCGGGAGCAGGAGAGGGTGCTGCAGAGTGTGCGGGACCTGAACAGGCTGCAGCTGCAGAAGAGGCTGGAGACAGCAGGTCACAAGAGGGAACAGCATGCGATGGAGAGCCCGAAGAAGGTCCAGGGGAGCAACCTGAGTACGGTTG	261	297
NM_001109497.1	Rattus norvegicus mab-21 like 1 (Mab21l1), mRNA	2390	AT	AT	ATGTACCATCGGAAGGAAAGTATAATGTATATTTTGATCTGTAACAAAAGTTGTGATCTCATGTTGTCTTTGAAAGTGTGGATATTGGTGTTTTGTGATTTGGTGAACAGAACTGAAATTGCCATTTTGGGGACTTCCAGACATTTTCCACAGAACAGAGATGCAT	166	202
NM_001109214.1	Rattus norvegicus engrailed homeobox 2 (En2), mRNA	2713	CC	AT	CCAGGTCTTAGGACCGCGCAAAACAATGCAATAAT	35	71
NM_001107973.1	Rattus norvegicus exonuclease 5 (Exo5), mRNA	2016	GG	AG	GGAAGAGGAGACAGCATCAGCAGAAGCCTCAGGGTTCTCAGACATAAGTGACTCCGAGTTAGTAGAGTTTCTGGACCTGGAAGATGCCAAAGAATCAGCTGTTTCACTTAGCAAGCCTGGCCCTTCTTCTGAACTCCCTGGGAAGGATGACAAACCTGTAAGCTTGCAGAACTGTAAAAGGGGATTGGATGTCCTGTCACCCATGGATAGATTCCACTTGAAGTATTTATATGTCACTGACCTGTGTACTCAGGACTGGTGTGAGTTGCAGATGGTGTATGGGAAGGAACTTCCTGGTTCTTTGACACCTGAGAAGGCAGCTGTTTTGGACATTGGTGCTAGCATCCACCTAGCAAAAGAACTAGAACTTCATGACCTTGTGACAGTCCCCACCACCAC…	419	455
NM_001106542.1	Rattus norvegicus ubiquitin-conjugating enzyme E2C (Ube2c), mRNA	763	CA	AT	CACTGTATATGAAGACCTGAGGTATAAACTCTCCCTAGAGTTCCCCAGTGGCTACCCTTACAACGCACCCACAGTGAAGTTCCTCACACCGTGCTACCACCCCAACGTGGACACCCAGGGCAACATCTGCCTGGACATCCTCAAGGACAAGTGGTCTGCACTGTATGATGTCAGGACCATCTTGCTCTCCATCCAGAGCCTGCTAGGAGAACCCAACATCGAGAGCCCTTTGAACACACATGCTGCAGAGCTCTGGAAAAACCCCACAGCAT	272	308
NM_001107219.2	Rattus norvegicus leucine-rich repeat LGI family, member 2 (Lgi2), mRNA	1783	GG	GT	GGGGCCATGACCTTGCAACCCTTCTCCTTCAAAGAGAACCACTACCTGGCCCTGGGGAGTGACTACACGTTCTCACAGATATACCAGTGGGATAAAGAGAAACAGCAGT	109	145
NM_001105896.1	Rattus norvegicus keratin associated protein 15-1 (Krtap15-1), mRNA	825	AC	CT	ACTCAGCATCTTGATATACCTGGAAGCAAATTATTTTTTGAAGACAAAGTAACCTTGGCCT	61	97
NM_001109523.1	Rattus norvegicus uroplakin 2 (Upk2), mRNA	822	CT	TC	CTTCTCCTCCCTCTCCCTGCCCTCTTCACTGAGTCCATTCCTGACAGTACCCCTCTCTCTGCTTCCAACACTCCCTGCCAGCCCCCCACCCCCCGAAGTCCCACCAAAGCTGATTTTTCTC	121	157
NM_001037981.1	Rattus norvegicus T cell receptor associated transmembrane adaptor 1 (Trat1), mRNA	1845	GC	AG	GCCAAGAGAGAACCTGTAATCTAGCTGGACTATAATTCAGCTCAATGGTAACACCCTTTGAGAGATGGTTGAAAAAGCAAGATTACCATGTGACACACAGGGATTGACAGAGTGACAGTCTACTCATTTTTCAGCGGAATGGTACCTTCCTTTGTCTTTATGGATCACATCCCTACACACTAAATCTAATTATAATTAGCTATATGAATACAG	213	249
NM_001109106.1	Rattus norvegicus HESX homeobox 1 (Hesx1), mRNA	1148	AT	TT	ATATTGTCATTCTTTGTGAAAATATTGCAAATAATTATGATTCTAGCACAGTACATGTTATAACTGGACATTTTTTAGTTATAATGAAAACCCCTTTCCTATATATTT	108	144
NM_001109671.1	Rattus norvegicus growth differentiation factor 3 (Gdf3), mRNA	1270	GG	GC	GGCCAGACATCCGAGTTTCAAGACTATGACTTTTTGCAATTTCTGGGC	48	84
NM_001108955.1	Rattus norvegicus four-jointed box kinase 1 (Fjx1), mRNA	2102				0	-
NM_001109493.1	Rattus norvegicus late cornified envelope 1E (Lce1e), mRNA	687				0	-
NM_001008398.2	Rattus norvegicus GTPase, IMAP family member 9 (Gimap9), mRNA	1700				0	-
NM_001134598.1	Rattus norvegicus H2A.P histone (H2ap), mRNA	555	AG	GT	AGCCCAAACCATCAAACCATCATGTCGGGGAAGAAGAGCCAAGAGAAGGCTTGCAGCGACAACAAGCAGACGGAAGATCCTTCTTCTAGGCCTGAGGTACAGGTGCCTGTGAACTATGTGTACCGCCTACTGCAGGAGGAGCAATACACCCCCTGCCTAGGTTCCACAACTTCTGACTTCCTCCTTGCCATGCTTGATTACCTTACCGACTACATCCTGGAGGTGGTGGGCTCCGAAGCCAACATCAACAGCCAGCAAAATATTTCACAAGATAGAGAGAGACAGAGAGAGAATGACCGTGAACCCCCTCAAGCCTTCAAGAATGCGCCTTTCTCTCTGTTTGATGAGATGCCTGGACCCAGAAGGAATGGCTAAAGAATGGGGTTCACAACCCAAGAG…	485	521
NM_001109309.1	Rattus norvegicus cyclin-dependent kinase 5 regulatory subunit 2 (Cdk5r2), mRNA	1469				0	-
NM_001024882.2	Rattus norvegicus cilia and flagella associated protein 45 (Cfap45), mRNA	1860	CC	GA	CCTTCCTGAGAAGTATTGCATCGAAGCTGAGCGCAAGGCCAACATCCTGCCACCCACTTCCGTAAACTGAAGGGGAGCCTCTATGGTCTCTGGGAGAGCACGGATTCAGCTTAGTTCCAGGGCATCCAAGTTGCTGCTAACCTAGACATTTCATAGTTACAGA	163	199
NM_001108599.1	Rattus norvegicus SCAN domain-containing 1 (Scand1), mRNA	766	GC	AG	GCTCCCTGGACTGACAGCCTACCCCGAG	28	64
NM_001015005.2	Rattus norvegicus DEAD-box helicase 47 (Ddx47), mRNA	1747	CA	CC	CAACTCCTTCATGATATTCTGTAGCACCTGTAACAACACTCAGAGAACAGCATTGCTGCTTCGCAATCTCGGGTTCACGGCCATCCCCCTCCATGGGCAGATGAGTCAGAGCAAGCGCCTTGGATCCC	128	164
NM_001109087.2	Rattus norvegicus shisa family member 3 (Shisa3), mRNA	2221	TT	TG	TTTCCTGGTGTCACCCCAGTATTTTGCATACCCTCTCCAGCAGGAGCCCCCGTTACCTGGGAAGAGCTGTCCAGATTTCAGTTCTAGTTGATGGGCAGTGGCTGTGGCTAGGCCATGCAGCGAGCGGCAGCCAGGCGGAGCGTCGCTGTCTCAGCCAAGCCACTCTCACTTCTGAGGAAATTTGTGGTAACCCATCATGCTCATGAAAGGAAGGTCCAGGAAGATGAAGCACTTTCTGGTCTTGAGGTTCCTGGCTACGATTACAGGAGGTCTGACCTGGCAATCATGGCGAATGTGACAACATAGTCACCTCTTG	316	352
NM_001109248.1	Rattus norvegicus DnaJ heat shock protein family (Hsp40) member B8 (Dnajb8), mRNA	996	TC	GG	TCAGTAACTGTCAACGGCAAGGAGAAGCTCATGCGGGTGGACAGCAAGTGACAGCCACCTAACCCATCCCTGGGCCAGCCTAGGGGGCCACAGGGGCCACAGTAGTCGCGACCTAGTGG	119	155
NM_001106554.1	Rattus norvegicus interleukin 36, alpha (Il36a), mRNA	869				0	-
NM_001011965.1	Rattus norvegicus stomatin (Stom), mRNA	1792	TA	CT	TACCTTCAAACCCTGACCACTATCGCTGCGGAGAAAAACTCCACCATTGTCTTCCCTCTGCCCATCGACATGTTGCAGGGCATCATGGGTTCCCACCACTGAGCAGTCCAGCTCTATGGGAGAGCTGTGCTGAGTCCTTCCCAGGGTAAAGAGGGGACAAAGTTAGCCT	169	205
NM_001107162.1	Rattus norvegicus DDB1 and CUL4 associated factor 15 (Dcaf15), mRNA	2225	CA	AT	CACTAGTGTTAGGTTGCGGGATGGGACTGGTGCAGCAGCCTCTGGTGGCCCGAGAGTCTGGATGTGTCTTTATTTATGCCTAT	83	119
NM_001106021.1	Rattus norvegicus C1D nuclear receptor corepressor (C1d), mRNA	3129	CT	AT	CTTGTGTGGATACGCAGTGGATATACTTTACTGCTGTGAACATGCATGCCTCTTTCCTCCCATTCTAAT	69	105
NM_001106776.1	Rattus norvegicus WASH complex subunit 3 (Washc3), mRNA	1039	TG	GT	TGCCGAGTGGCGAGAGTGAAAAAGCCATAGAAGAAAGTTCAGAGAGTGAGTCTTCCTTCAGTGACTAAGCTGTGAGAATCACAGAACGTGGAAGGGTGGATTTATGTTCTAGGAACGAGCGTAAACTCTAGCTCTCGGTGAGAGAAATCACCACATGCTATGCTACATACCTACCCCAGCCTTCCTGT	188	224
NM_001007650.1	Rattus norvegicus testis-specific serine kinase 3 (Tssk3), mRNA	1003				0	-
NM_001011987.1	Rattus norvegicus GLI pathogenesis-related 1 (Glipr1), mRNA	1072	GA	TT	GAATATGTTGTACATGTCTTGGGACCCAAAACTAGCCCAAATTGCAAAAGCGTGGGCACAGTCTTGTGTATTTCAACACAACCCACAGCTGCATTCGCGAATACACCCAAACTTTACTGGCCTGGGCGAAAACATTTGGCTTGGCTCTCTATCCCTCTTCTCAGTACGTGCGGCCATCCTCGCCTGGTTTGAAGAAAGCCAGTACTATGACTTCAGCACTGGGAAATGTAAAAAAGTCTGTGGGCATTACACTCAGATTGTTTGGGCAGATAGTTACAAGATTGGCTGTGCAGTGCAACTCTGCCCCAGAGGAGCAAATTTTATTTGCAACTATGGACCAGCAGGGAATTACCCAACGTGGCCATATAAGCAGGGAGCCACTTGCAGTGCTTGCCCAAA…	637	673
NM_001106810.1	Rattus norvegicus ADAM metallopeptidase with thrombospondin type 1 motif, 15 (Adamts15), mRNA	6064	TT	CT	TTGGGACTACTGGAGACCCATCTGTCATCCTTGTAGACATGACAGTGAAATAGAAATCCAGGCATTTCTTATAGCAGGGTATTTTTTTTGAAGACCTGGAAGCTCCAGTGTATACAGGGCATCTTCAAAGAATCAGCAGTGCATCCAGGACCTCAGTGGAGGGTTAGATGGAGACGAGACCAAAACCCTTGTCTTCACATGGAGGATAGCAGTCTTTGTCAATCCTTTTACATGTTTCCAGGGAGTCAAAATCCACACAGCAGCCAGTGGGCCTGTTTTGCCCCTAGAGCAGTAGTTCTCAACCTCCTAATGTTGCAACCT	321	357
NM_001024741.1	Rattus norvegicus chromatin assembly factor 1 subunit B (Chaf1b), mRNA	1958	AG	AT	AGAATAAAT	9	45
NM_001107270.1	Rattus norvegicus nei-like DNA glycosylase 2 (Neil2), mRNA	1042				0	-
NM_001008315.1	Rattus norvegicus lymphotoxin beta receptor (Ltbr), mRNA	2103	GG	CC	GGACCTTGCAAGGCTTTGTGGTGCTCATCCCCAACCTTCAGAGGCCTTGAGGGCTTGTACTGCGTGGACCAAGATAGACCCTGGGTGAACATGATGTCGCATGGAGGAGCACCCCTCCCTTGCTCCTGGGGGAGAGAGGACAGTGAGAAGGGCAGGGGGGCTTCAGTAGCATTACCACATGTGGAGGACAGTTTGGGAACGGGAGAAAGAGTACAAGTGTATTTATGAATTGTAACCACATGCAAATAAAGACAAGATGGAGATCC	266	302
NM_001107501.1	Rattus norvegicus CAP-GLY domain containing linker protein 3 (Clip3), mRNA	2123	AC	TA	ACCCCAAAGGACATTGCATCAGAGAACTCTATCTCCAGGTTACTCTTCTGCTGCTGGTTTCCTTGGATGCTGAGGGCGGAGATGCAGTCTTAGAGACCTGGATACCTAACACAGAGACAGAGTCCCCTCTAGCATCTCCTGACACAAGGAGACCCCAGTCACCCTAAGATAGAGATTCCCAGTGACACCTCCAGAATAGAAACCCCGTTAGCCAGCCCTCGATTACTGAGGTCCCATTA	239	275
NM_001126275.1	Rattus norvegicus CCM2 scaffold protein (Ccm2), mRNA	1807	CC	CC	CCTGGCCCTGCACAGCTGATATTTGCACATGACTCTCCTCTCCTAATTCTCAGAGACC	58	94
NM_001107437.1	Rattus norvegicus junctophilin 3 (Jph3), mRNA	3606	AT	TT	ATGTACAATGTAACTTGTTTCAGTCAAACAACAGGTTCCTCATGTCTCTGCCTTCTCTACCAGGGTTGTTCCCTCATCCAAACAAATGAACAAGGGATGCCAGCTCGCCTGGCACCCGTGGCTCCGTCAGTCTTCTTGGGTGCAGCCCGTTTGTCTTATGGACTTTGCCTTGCTTTGCTCGTGTTCAGCTGTCCTCTGCTACCTTTCGAGCAGATTTCTTTACTACAGTGCACTGGATTGCTATATTT	248	284
NM_001079887.1	Rattus norvegicus inhibitor of growth family, member 4 (Ing4), mRNA	1615	CA	CT	CATCGGGGACTCAGAACTTTGTAATTACGAGTACGCGCTCCGCGAAACACCTTTCACTCAATAAATCATGTATTTGCT	78	114
NM_001106759.2	Rattus norvegicus exocyst complex component 3-like 4 (Exoc3l4), mRNA	2807	AC	AA	ACATCAGGCGAGACCACATTCTGGCCATTCTGGCACTACGCAGACTCGGTCGCCGTCGGAACCAGAATCTCTTGCAGCACACCCAAGACCTGCTGAGGGCAGCCCACGAGAACAGGCCCTCCTCACACCACGTGCTCTTTGAGGAGATTGAAGTGCCCACCTCTGTGGATGTGCTCATCACCTGCATCTAGGGCTGAATGTCGAGCAGGAGCCTCCTAGGCAGAGGATCTGTCACCCTCCCTTTGACTGACCCCAAGTTGGGAGCCTAGTGAGTCATTCTGGCCCTTTTCCCAGCTCCGAAGCCTGGAGCCTTGGAATTTTTGGTCTTAGTTGCCTGGATGCTCAGCCAGGGGGAACCAAGAGATGAGGCATCCCAGGCATTTGTGGGGGAGTCTTTTG…	510	546
NM_001107748.1	Rattus norvegicus solute carrier family 35 member C1 (Slc35c1), mRNA	3027	AC	AT	ACCATGATACCCCAGCACCACACCCTCCTAACCTCAGGGTAGCTGTCACTGTTCTAGTCCCTTCTGTTTGGCCTTTTTTACCCCCATGTCCTTGGGGTAATGTTTGATGTCTTTGTCCCTTTCATGAAAAGATGGGGAAACTGTGTTTGCCTTTGATTTCTACTTCCCACAGGTTCTAATGAAGTTGGTGGGGCCTGCTGGCCTGAGTTGTATGTGAT	218	254
NM_001107747.2	Rattus norvegicus Rho GTPase activating protein 1 (Arhgap1), mRNA	2894				0	-
NM_001108358.1	Rattus norvegicus ligand of numb-protein X 1 (Lnx1), mRNA	2790	AC	AT	ACAGAGGCCGTTGCCATACTGAAGAGCACACCCTCCTCAGTGGTACTCAAAGCCTTGGAAGTCAAGGAACAGGAGACCCAGGAAGACTGCAGCCCAGCAGCCCTGGACTCCAACCACAACGTGACCCCGCCTGGTGACTGGTCCCCATCCTGGGTCATGTGGCTGGAATTACCACAGTACTTATATAACTGTAAGGATGTGATACTACGAAGGAACACAGCGGGAAGCCTGGGCTTCTGCATTGTGGGAGGTTATGAAGAATACAGTGGTAACCAACCTTTTTTTATCAAATCCATCGTCGAGGGAACACCCGCGTATAATGATGGAAGAATTAGATGTGGTGACATTCTTCTTGCTGTCAACGGCAGAAGCACGTCGGGGATGATGCACGCCTGCTTA…	543	579
NM_001106089.1	Rattus norvegicus ASH2 like histone lysine methyltransferase complex subunit (Ash2l), mRNA	2396	AC	CA	ACACGTACAAAGATAAGGCTTTGATAAAGTTCAAGAGTTATTTGTATTTTGAAGAAAAAGACTTTGTGGACAAAGCAGAGAAGAGCCTAAAACAGACTCCACATTCTGAGATAATATTTTATAAAAATGGTGTCAATCAGGGTGTGGCTTACAAGGATATTTTTGAAGGTGTTTACTTCCCAGCCATCTCACTGTACAAGAGCTGCACGGTTTCCA	216	252
NM_001024903.1	Rattus norvegicus SERTA domain containing 2 (Sertad2), mRNA	1535	GA	CT	GAGGCCCCACCTGCCTTCACCCCCCTGGCCTCGCCTCCTGCTCACCCCTGTGACCTAGGAAGCACTACACCCTTGGAGGCCTGCCTCACCCCTGCCTCGCTGCTCGAGGGCGACGATGACACTTTTTGCACTTTGCAGGCTGTGCACCCTGCGGCTCCCACCAGACTCTCTTCTCCAGCTCTCTCAGCAGAGAAGGACAGCTTCTCCTCCGCCTTGGACGAGATCGAGGAGCTCTGTCCTACATCTACCTCCACAGAGGCTGCCGCAGCAGCAGCCCCTGAGGGCTCGAAAGGAACCTCCAGTGAGACCAGTGTCCAGAAACCCGAGGGGCCCCAGGAAGGCCGCACAGACGACTCAAGATTCATGGACTCTCTGCCTGGGAATTTTGAAATAACAACG…	826	862
NM_001107080.2	Rattus norvegicus DiGeorge syndrome critical region gene 6 (Dgcr6), mRNA	1029				0	-
NM_001144850.1	Rattus norvegicus prosaposin-like 1 (Psapl1), mRNA	2561	AT	AT	ATCTTGCCGTTGCCTTACGTGCTGCAGTGCAACCGTTTTGTAGCTGAGTATGAGCCTGTGCTCATAGAGAGCCTCAGGTTCATGATGAACCCCACGGACCTATGCAAGAAGATGGGGGCCTGCCACGGCCCCAAGGTTCCACTTCTAGGCACAGACCAGTGCGTCATGGGCCCCCGCTTCTGGTGCAAGAGCCCAGAGGCCGCCGAGATGTGTGATGCCCTGGAGCACTGCCAGCGCCTTGTGTGGAAAAAGCCCATCTCCAGAACCAATGAGCAGCCATGAATGTGGCCACCAGAACTCAAAGCCTGCCAGGGCCAAGCTCACCTGCAGGCTTCTGCCTCCCATGGGGACCCTATGAAGTGGGGGTTATCCCCATGTCATAGAT	385	421
NM_001106678.1	Rattus norvegicus NOP2/Sun RNA methyltransferase 4 (Nsun4), mRNA	2563	AG	GA	AGGTCACGTTGTCTATTCCACTTGTTCACTGTCACACTTACAGAATGAGTATGTGGTGCAGGGTGCCATCGAGCTTCTGGCCAATCAATACAACATCAAGGTTCAAGTGGAAGACCTGTCTCACTTCCGAAAGCTTTTCATGGACACATTCTGTTTCCTCCCATCCTGCCAGGTTGGGGAGCTGGTAATACCAAACCTCATGGCCAATTTTGGACCTATGTACTTCTGCAAATTGCACAGGGTGCCATAGTGTCACCCCATCCCTGAAGTAGGAAGGTGATGACTCCATCAGAGGCATTGTAACAGGCTGGCGGCAGGTGTGTCCCAGGCCTGTCTCCATCCATTACATCTAAAGATCGCTGTACACGGCAGTGGGTAGGGACCGCTGCCCAGCTGAGT…	472	508
NM_212506.2	Rattus norvegicus prefoldin subunit 6 (Pfdn6), mRNA	697				0	-
NM_001100556.1	Rattus norvegicus general transcription factor IIE subunit 1 (Gtf2e1), mRNA	2897	TA	TT	TAGTCTGGTACAGAAGTGTAGTAGGAGAGAAAATCTGATTTTTTT	45	81
NM_001134425.1	Rattus norvegicus androgen-induced 1 (Aig1), mRNA	1385	TG	TG	TGGAGGTAGAATCAGGCTTGCCTCCGTGAGCAGTGTTAGTAATAGTATCCGTTTAGTCAAAACCCTGAGTGTGCTTGGATCTCCCTGTTTGATCTGTGAAACTCTTCCCATATACAAACGTGACTG	126	162
NM_001107651.1	Rattus norvegicus DEP domain containing 1B (Depdc1b), mRNA	2495	AT	CC	ATGTGATGCTGTGACGAAGCTTGAGGGACCTCAGTGGTAGAGACACTTTGAGTCGGTTGAGACTCAAGAACGCCGTTATAAACTACTAAATGTGTGGCTTCAGGTCGCCCAACTCC	116	152
NM_001106235.1	Rattus norvegicus coiled-coil domain containing 97 (Ccdc97), mRNA	2950	TG	GC	TGTTGTGGTGTTACACCCCTACCCTTACCTCCCCAGAGGACACTGTGAGTCCACAACTGGGATCCCACCACACTGGACGGGAGCCAGGAGCGCTCTTTTGGGAAGTCCATTGGC	114	150
NM_053802.1	Rattus norvegicus transforming growth factor, beta induced (Tgfbi), mRNA	2696	CC	TG	CCACAAGAACGGGGAGAAGAGTTGGCAGACTCTGCCCTTGAAATCTTCAAGAAGGCGTCAGCCTATTCCAGGAGTGCCCAGAGTTCTATGCGACTTGCCCCTGTCTATCAGCGGTTACTAGAGAGGATGAAGCGGAGAGGATGAAGCATTAGCAAGAAGGACCACAGAGGAGTGCCCTGCAAGCAGCTTCCTGCCAGTTTCTCTCAGTTTGCCAAAGAGACCATTGAATGTTTCGGAAACCAAATATCACACTTCAACATACATGGGCTGCACCACATTGAGATCTGAGCCTTGGATGGGTTGGGATG	308	344
NM_001107097.1	Rattus norvegicus zinc finger and BTB domain containing 11 (Zbtb11), mRNA	4883	CT	CC	CTACACAAGGGCATGGAGAAAAAGTTACAGAAACGGAAAGCCATTTCTAAGTCAGCAGTTCAACAGGTGGCCCAGAAATTAGTTCAAAGAGGGAAAAAGATGAAACAACCCAAAAGGGATGCTAAGGAGAGTGCCGAAGAAACGCCTCATAAATGTGGGGAGTGTGGGATGGTGTTTCCAAGACGATATGCCTTTATAATGCATACATTGAAACATGAGAGAGCGAGAGACTACAAATGTCCGTTATGTAAGAAGCAGTTTCAGTATAGTGCCTCACTACGAGCACACCTTATACGACATACAAGAAAAGATGCACCCACGTCATCTTCATCTAATTCCACATCTAACGAGGCATCAGGAGCATCATCTGAGAAGGGACGAACCAAGAGAGAGTTTATA…	703	739
NM_001106601.1	Rattus norvegicus bolA family member 3 (Bola3), mRNA	1093				0	-
NM_001025644.1	Rattus norvegicus synaptogyrin 4 (Syngr4), mRNA	1623	GA	CT	GAGCAGAAGAGGAAGCCAGGCAGACAGAAGAGTCTACCCTCCCAGAGAGGAGCACTGGTCCTCGGCCCTCGGAGAATAGCAGCTGAACCCTGAGGTGGGCCTGAGGCACACAGGCAGTGGCACCCAGAAAGCAGCACCCAACAGCCCTGCTCCTTCTTCCCAGGACACTCAAAGAAGAGCAGCCACTATGCACCTCCCCGAAAGCCTGCAGGACCTGGCAGACAGTGAGACTGTGCGCTTTCTGAGGAGACCAAAGAGCGTCTCAAGGATCTTCGGAGGGGTCTTTTCCCTGGTCATCTTTTCCTCTCTACTAACTGATGGTTACCAGAATAGGACGGAGTCTCCTCAGCTCCGCTGCGTACTCAACAGCAACCACATGGCCTGTAGCTTTGCAGTGGG…	479	515
NM_001108686.1	Rattus norvegicus family with sequence similarity 76, member A (Fam76a), mRNA	3008	CC	TT	CCTGTGCCACTGGGGTGGGGAATGCTACTCCCCTTCTAAGCAGGGAAAACTGACATGCTGAATCATTTTGTAACTGTGAGTGAGAAACTTTCAGGTGAAGATGAACTAGCATACAGTATTGTTCAGGTGCGTTTGCATTGGCTCTGGGGAAAGACGGTAGAAAAAGAACAACAGTCTTGGTTT	183	219
NM_001012020.2	Rattus norvegicus poly(A) polymerase beta (Papolb), mRNA	2349	TA	CT	TATCCCTGTTTTTCCTAGAGATCCTATTCCT	31	67
NM_001109600.1	Rattus norvegicus ADAM metallopeptidase domain 30 (Adam30), mRNA	3441	TT	GG		0	-
NM_152937.2	Rattus norvegicus Fas associated via death domain (Fadd), mRNA	716				0	-
NM_001025407.1	Rattus norvegicus ALG5, dolichyl-phosphate beta-glucosyltransferase (Alg5), mRNA	1488	TG	TT	TGCCTGGAGGCTTGAGCAAACAAGGAAAGTGAGTTAGTTTGCTGGTAGGACTGGACTACATTT	63	99
NM_001105952.1	Rattus norvegicus SRY-box transcription factor 13 (Sox13), mRNA	3563	GC	AC	GCGCCTCCCTCCCCACCTCTGTTGACCCCATTTCTCTCCAGACTGTTTCTTTTTATGACTGTAAACATAGATAGTGCTTTATTTTGTTACTAAGAAGATAATGATGAATAAC	112	148
NM_001106268.1	Rattus norvegicus chondroitin sulfate synthase 1 (Chsy1), mRNA	3758	CT	TG	CTTAGTCCTGACTTGAAGCCCACCCAATGAGCAAAACTTTTCTATAAGAATTTTTTGGTCTTTGGTTTTTACATTTCTTTTCCAGACAACTCCCCTTTTTCTCTCTAGTCCTAAGGCAGAAAAAACGTGAACATTCCTAAGAAGTATTATCGTGATAAGAACACTGTAACCCTGGTGGATGTCCTGTTGAGACTGTTGACCTGTCTCTGGTAAATGTCCTGTTGTGACTG	230	266
NM_001166403.1	Rattus norvegicus RT1 class I, locus T24, gene 3 (RT1-T24-3), mRNA	1458	GT	CT	GTGAGCTAAGGCAAGAAGCCCAGAGACTCTGAAGGGATGGTAGGAGCTTTGCCTGTGCCTGGGCACTAGGCCCATCAGTAGCCGTACCCTCATAGATTTGTGGCCATCAGTTATGTAATGGCAAAAGGCCCAAGCCCCCCACATTAGATGAAGAAAAGAGCTGTGACTCCAAGTCACAGAGGCTCTTAGGCTTGTGGACAGCTTTTGGGAGTCAGTTCTCACCTTTGATCTCTGGGGATCAAAGAGTTTGGAAAGACGCCATTTACCCACTGAGCCTTCTCTCAAGCCTCAATAAACATCT	301	337
NM_001106097.2	Rattus norvegicus mediator complex subunit 10 (Med10), mRNA	860				0	-
NM_001007145.1	Rattus norvegicus catenin alpha 1 (Ctnna1), mRNA	3643	GG	CC	GGTGAGCACCCAAGGGAGAGGTTGCCTTTAGCCCTACTGTGGGGCAGTATGGAATCAAATGGCCAAGGGTGACCCAGGGTAAACCATGGGGCACC	95	131
NM_001107702.1	Rattus norvegicus Fc receptor-like 2 (Fcrl2), mRNA	2262	AC	TT	ACTTCATCTGTGGCTTATCCTTCAAGAGGACTCGAAACAATCTGCTCTGAGATATTGTCCTAACAGCTACAAAGAAAGCTCTTTTCCCTTGTCCCCAGAAGCCAAGCTTGGAAAAATTGTTCCCTTGTCCAGGTTCCCTGCCTTTCTGGTTCCTTCTAGCTGCCTCCTTGGGCAGATGTAGAGGTGGCACAAGTGAGGATCACGTGTGCCTGAGTTTCCATCGAATAGAATGTGGTCTAATGAAGCACATACAGCAAAAGAAACTCTGAGTGTCTATGTTCATTTCTTGACATAGGAAGAAACCAGCTTTTT	312	348
NM_001107529.1	Rattus norvegicus protein regulator of cytokinesis 1 (Prc1), mRNA	2928	GC	CA	GCCTAGTCTGTTCCCTGTAGTTGACAACCAAATAGAGAAGCTATCTGGGTGGGTTGGGCCATTTCTGTCATGGACTCCACAACTTTGCACATCTCCATGTTATCTGTGTGATCACGTCCACACTGAGGCTCTTTCTTGCCTACCCAGTTCATCACTACTCTCCCCAAAGCACTATTATTTATTCTGTCTGTGCCAGTTCTGCCAACACA	209	245
NM_001107171.1	Rattus norvegicus cyclin T2 (Ccnt2), mRNA	5652	CA	TC	CAAGCCACTGCTGGGGGTTTTACATTGGTTTGCACGTCTTAGTAGGTTCTCATTGAGGTAATGCTTGCACTGTCACCTGACGCCTGGTCAGGAGATAGACTGACTGACTTGTCTAACTTTTGGTGTAAGCACCAATAGTATGGCTCTTGTCTCTTGCCTAATCTTGAATTTATTTCTGTGGTAAGTCTTCGCTGTTGAGTCTC	203	239
NM_001009649.1	Rattus norvegicus leupaxin (Lpxn), mRNA	1730				0	-
NM_001309804.1	Rattus norvegicus N(alpha)-acetyltransferase 50, NatE catalytic subunit (Naa50), transcript variant 1, mRNA	1851	TC	TT	TCAGAGTGCAGAGACACAAAAGACAGACAACTGAACACATCTCAAATGAACTCTCTTGCACTTGCTTGTCGCCAAATAAAAGAAAGACAGACCCACTGGTTCCCTTCCCCCTTTCTTCAGCTTTCCTCCTTTGTTACTCCTTTTTTCTTTCCTCTTACAGTTT	163	199
NM_001011980.1	Rattus norvegicus peter pan homolog (Ppan), mRNA	1659				0	-
NM_001106231.2	Rattus norvegicus protein phosphatase, Mg2+/Mn2+ dependent 1N (Ppm1n), mRNA	1621	GG	CC	GGAATGTCAGGAGAAGAGGTGAGATGGGTGGAAACCATAGGCACCCACTCAAACCTTGAACTCAGAGGCCTGAGAGCGTCGGTCCTCGGGGGCATCTGTGCATCTCAGGGGAAGTCTGTGCTTCCCTATCAGGAAAGTCAGAGGAAGGAACCAGCCGTGGGGGAACCCAGACCCTTCATTTCCTCTTCTACTTCCCCCTCACCAGCCTCATGATGGGGAATTCCACCATCTCCCAACAGCAGAAAACCCAACCAAACCTGCTTCTTTTTCTCCCCC	276	312
NM_001012050.1	Rattus norvegicus F-box protein 8 (Fbxo8), mRNA	1646	AA	CA	AAACAAGCCCAAGGAGGCATCGATATATATCATCTTCTGAAGGCAAGGAAGTCTAAAGAACAGGAAGGGTTCA	73	109
NM_001009172.3	Rattus norvegicus zinc finger and BTB domain containing 22 (Zbtb22), mRNA	2570	AA	TC	AACTAAGCAGTTTTTCTTCTCCCTTGAGCACACCAGAGCCCCACCTTCACGGAGTAGTGCCAAGACGGTGGGGGGATGGAAAAGGGACATTTTGAGCATCCTGGAGTCGCAGGGCCAACAGTCAGGTTGTGCTAATTTGTGCCTGAAGTCTGTGTTTGTGTTGTGGGACGAGGCCTTTGAGACTCCTCTTGAAGGATGCGCCCCTTATTCCTGTACTATCCCACCCTTGCCATGAGGATCCCAAATTGGGTTGTCATGAAAGTGGGCGGAGACAAGGGGTGAGCCGCGTAGTATAGGTC	299	335
NM_001107111.1	Rattus norvegicus interleukin 10 receptor subunit beta (Il10rb), mRNA	1805				0	-
NM_001107688.1	Rattus norvegicus ubiquilin 4 (Ubqln4), mRNA	3258				0	-
NM_001107170.1	Rattus norvegicus transcription factor CP2-like 1 (Tfcp2l1), mRNA	8869	GC	CC	GCCTCACACATGTGAGGCAGGTGTTCTACCACTGAGCTAGCCC	43	79
NM_001105863.2	Rattus norvegicus THAP domain containing 7 (Thap7), mRNA	1245				0	-
NM_001107826.1	Rattus norvegicus dolichol kinase (Dolk), mRNA	2039	CC	AC	CCACTGCTGTATGTGGCCGCCACCGTGTGTCTGGCCGTCTTCATCTTCCTGGAGTATGTGCGCTATTTCAGAATCAAGCCCCTGGGTCACACTCTGCGCAGCCTTCTGTCCCTCTTCCTGGATGAACGGGACAGCGGGCCCCTCATCCTGACGCACATCTACCTGCTTCTGGGCATGTCTCTTCCCATTTGGCTGATCCCCAGACCCTGTGCACAGAAGGGCAGCCTCGGAGGAGCAAGAGCCCTGGTCCCCTATGCTGGGGTCCTGGCTGTGGGTGTGGGCGATACTGTGGCCTCCATATTTGGCAGCACCATGGGGGAGATCCGCTGGCCTGGAACTAAGAAAACATTCGAGGGAACTATGACATCTATATTTGCACAAATCATCTCTGTGGCTCTG…	695	731
NM_001107483.1	Rattus norvegicus interferon regulatory factor 2 binding protein 1 (Irf2bp1), mRNA	2702	GG	CC	GGCTGAAGCTGTCAGCGGGGGTGGTAGCGGCACAGGGGCGACCCCTGGAGCCCCCTTGTGCTGTACCCTGTGCAGAGAAAGGCTGGAAGACACCCACTTCGTGCAGTGTCCCTCGGTACCTGGACACAAGTTCTGCTTTCCTTGCTCCCGAGAGTTCATCAAGGCACAGGGTCCAGCTGGAGAGGTGTACTGCCCCAGTGGAGACAAATGCCCACTGGTGGGTTCCTCTGTCCCCTGGGCCTTCATGCAGGGCGAGATCGCTACCATCCTTGCTGGTGACATCAAGGTCAAGAAAGAAAGGGACCCCTAGGTTGCCACTGCCGTCAGGCTGCTTCCCCTCCCCC	344	380
NM_001100511.1	Rattus norvegicus RIO kinase 1 (Riok1), mRNA	2085				0	-
NM_001009602.1	Rattus norvegicus actin related protein 10 (Actr10), mRNA	1457	GT	GA	GTTGTGGTTATTGAGTCAGTGTTATGTCCTTCCCACTTCAGAGAGACCCTTACTCGTGTTCTTTTCAAATATTTTGAGGTCCCATCTGTCCTACTTGCTCCAAGTCATCTGATGGCACTCCTGACGCTCGGGA	133	169
NM_001011918.1	Rattus norvegicus annexin A11 (Anxa11), mRNA	2363	AC	TT	ACCCTGATTCGCATCATGGTGTCTCGAAGCGAGCTTGACCTGCTGGATATCCGAGCAGAGTATAAGCGGATGTACGGCAAGTCACTGTACCACGATATCACGGGAGACACTTCTGGGGATTATCGGAAGATCCTGCTGAAGATCTGTGGTGGCAACGACTGAGCGGTGGCAGTGGCTCACCTGTGCCCCCTGCTGGCCCCCTGCTGGCAGTGGCCAGGAAACGTCCCGAAGAGCACACCAGTTTCCCCCAATCTATCTAGTACCCACAAGTGCACCCCCCAGCCATCCACCCATCCCCAAAGCCATGACCTTTTCCTTCTGGTCCCCCCTCATCCACGTATTGTGCCGAAGGGCCCAGGTGGGCCAGGTTCTCAGGTGACCATCTCCCTGGCCCTCACA…	526	562
NM_001037195.1	Rattus norvegicus ras homolog family member G (Rhog), mRNA	1247	GC	CC	GCGGTGCTCAACCCAACACCGATAAAGCGTGGGCGGTCCTGCATCCTCTTGTGACCCTGGCACTCAGCTTGGAGGCTATCCCTTGTCCCCCTACCAATTGTGCCTTGGCGCCTTGTCTGCCCCCAGCTGTGCC	133	169
NM_001107084.1	Rattus norvegicus BCL6, transcription repressor (Bcl6), mRNA	3389				0	-
NM_022269.2	Rattus norvegicus CD55 molecule (Cromer blood group) (Cd55), mRNA	1836	GG	CC	GGACTCGGGCACCGCCGCCGCCGCCGCTGCTGCTGTCGCTGTCGCTGCTGCTGCTGCTGCTGTCCCCGACTGTAAGCGGAGACTGCGGCCCACCTCCAGACATTCCTAATGCCACGCCAAACTCGGGTAAACACACCAAGTTTGCCCACCAAAGCCAAGTGACATATTCGTGTAATAAGGGCTTCAAACAAATTCCAGACAAGCCAAACACAGTGGTCTGCCTTGAAAATGACCAATGGTCTAACTACGAAACTTTCTGTAATAAAACCTGTAGTGCTCCACTGAGACTGAATTATGCATCCCTCAAAAAGGAGTATCGTAACATGAATTTTTTCCCAATTGGCACCACTGTGGAATTTGAGTGTCGGCCAGGATTTCAAAAAGTAACTTCACGCACAG…	902	938
NM_001106651.1	Rattus norvegicus sorting nexin family member 30 (Snx30), mRNA	3128	AG	TC	AGAGGTCGCCGTGGGAAAACAGCACAACACCACCTCTTGAGTGTGTACTTTCTCCCCACCCACCCCCAGTCGTTTTCAGTTAGTATTTATTCCTTGGAGTCTGTGAGGCTGTAATCATCTCTCAGCAGAAGCATACCTCCATATTGTGAAGGAACCTC	158	194
NM_199380.1	Rattus norvegicus eukaryotic translation initiation factor 2 subunit beta (Eif2s2), mRNA	1462	TA	CT	TATTCAAGCTGTTGATATACTCGTTGCCTACT	32	68
NM_001008328.1	Rattus norvegicus poly (ADP-ribose) polymerase family, member 3 (Parp3), mRNA	2123	AA	CT	AATTCAGGTCCACGAGGACTACGACTGTACCCTGAACCAGACCAACATCGGTAACAACAATAATAAGTTTTACATCATCCAGCTGCTGGAGGAGGGCGGTCGCTTCTCCTGCTGGAATCGCTGGGGCCGAGTGGGAGAGGTGGGCCAGAGCAAGATGAACCACTTCGGCTGCCTGGAAGATGCAAAGAAGGACT	194	230
NM_001106298.1	Rattus norvegicus BAF chromatin remodeling complex subunit BCL7C (Bcl7c), mRNA	986				0	-
NM_001107489.1	Rattus norvegicus zinc finger protein 575 (Zfp575), mRNA	1138				0	-
NM_001106828.1	Rattus norvegicus poly (ADP-ribose) polymerase family, member 6 (Parp6), mRNA	2610	AC	CA	ACCGCCAAGAAGCTCTACGGAAGCACCTTTGCCTTCCATGGGTCCCACATTGAGAATTGGCATTCAATCCTGCGCAATGGGCTGGTCAATGCATCCTACACTAAACTGCAGCTGCATGGAGCAGCCTATGGCAAAGGCATCTACCTGAGCCCCATCTCCAGTATTTCCTTTGGATACTCAGGAATGGGCAAAGGACAGCACAGGATGCCTTCCAAGGACGAGCTGGTCCAGAGATACAACAGGATGAACACCATCCCCCAGACCCGATCCATTCAGTCAAGGTTCCTGCAGAGTCGGAATCTAAACTGTATAGCACTCTGTGAAGTGATTACATCTAAGGACCTCCAGAAGCATGGAAACATTTGGGTGTGCCCTGTGTCTGACCATGTCTGCACAAGG…	442	478
NM_001270417.1	Rattus norvegicus WW domain containing adaptor with coiled-coil (Wac), mRNA	2385	AG	AC	AGGGGGGACTCTCAGCCTTTCCAGACAC	28	64
NM_001005891.1	Rattus norvegicus C-type lectin domain family 4, member A3 (Clec4a3), mRNA	779				0	-
NM_001100518.1	Rattus norvegicus heparan sulfate 2-O-sulfotransferase 1 (Hs2st1), mRNA	4133	CT	TT	CTCTGGACCTTGCAGCTGTGTGATGTTAGTCAGCTCACCTGACCTCTGTCTGCTTCAGCTTCCTCATCTCGAGATCAGGATACCTGCTGTACCTACCTCACAGGGCTGTTGTGAGGACTAAGGAAGACGGCATGGCAGAGAGCACTGTGAAAGTGTGGCGTGGTGTTCAAATGTGAGGTGTTATCACAGACGTATCTCTAGCCTATGGTTCCATAGCCTTCATTCTTT	228	264
NM_001048184.1	Rattus norvegicus Ras-related GTP binding C (Rragc), mRNA	2548	TG	CT	TGAATGTCGCTGTCAGTTCCAGCCTGAAACAGTAGGAAACTGAGTTTTATATGCTTCCCTAGGCCTTCACTTGAGTAGTGTCTAAAGACTCGCTTTGCTTACGTTCTAACACTGCCTTTCAGAGCTCAGATCTCACTGTACCTCTAGGACCTCGAAAGTGCATTAGCTTGCTGACTCAGAAGACAAAGCAAAGGATGTTTCTATTTGTCCTGAAGAAAAGAGGAAGTTTCTGTGCGGCACTGGGGAGAGCCAGGCTCGGCAAGGGCTGCATCAGTTCCCTGGATGTGTTGAGGAAAAAACTTTGAAACAGAAGTGATTTTTCACACCTGGGGTTTGGGTAGCAGATGGATGTACTCTCCTCATTTGATCTTGATCATGCACAATGTAACAAAGGGAATT…	523	559
NM_001105866.2	Rattus norvegicus cell division cycle 45 (Cdc45), mRNA	1893	AG	TT	AGCAAGTTCCTGGATGCTCTTGTGTCACTGCTGTCCTGAGGAATTTGATTTCTCCAGAAGTGACCTCCTCCTCCTCCTCCTTATTTATATCACCTGGCCGCTGTTCACTTGTAAGATAACATTTGAAATGTGAGACTGGTTT	142	178
NM_001106520.1	Rattus norvegicus small integral membrane protein 26 (Smim26), mRNA	646	CG	TA	CGGATGTCTATTGTCTATGCACTAGGCGCCTGGTCGGTGCTGGGCTCGGCGATTTTCCTTACACGAAAACCGAAGATGTCAGACTATGGGGAAAATGAAGAGGATGACTCAAGCAATGAAATGCCTTTTTCTACAAGTGAAGACTCTGATTTAGCGATGGAAAGGGCTGAGCCTA	175	211
NM_001107272.1	Rattus norvegicus PNMA family member 2 (Pnma2), mRNA	3327	GC	TT	GCAGTTTTGATCCCCATAACCCATGGGGTAGAAGAAGAAAACCACTTCCTGCAAGCTGTCATTACACACCACACACACACACACACACACACACACACACACACACATACACACACACACATTCATGTAATTTTTTTTTTTTTTTTGGTTCTTTTTTTCGGAGCTGGGGACCGAACCCAGGGCCTTGCGCTTCCTAGGTAAGCGCTCTACCATTGAGCTAAATCCCCAGCCCCATGTAATTTT	243	279
NM_001004231.1	Rattus norvegicus neural proliferation, differentiation and control, 1 (Npdc1), mRNA	1386	TG	AA	TGGGGACAAGCAAGTCCTGGTGTTCCCCATGGAAAAGAACAGCATTGTGACCCTCTGCATGCTTTTGGCAGGAGAGAGGCGCCAACCCCTGGGCTCCCTTGCCAGGGAGATTCTCTGCCTTATGTGGGAGATCCAGCATCTGCTTGCATATTCTCTGTCTGGTCTGAACCCTCAAACTGGAGATGCAAGTCCAGGAACCCTAGAGCCGAGGCATGGATAGAGAGTTCTGGAGATAAAAGCCAA	243	279
NM_001011900.1	Rattus norvegicus testis-specific serine kinase 1B (Tssk1b), mRNA	1447				0	-
NM_001004232.1	Rattus norvegicus fascin actin-bundling protein 3 (Fscn3), mRNA	1795				0	-
NM_001106033.2	Rattus norvegicus embryonal Fyn-associated substrate (Efs), mRNA	2529	CT	AT	CTAGAGGTTCATCTCTTGGTCATTTTAGCCACCCACCGAGGCATCTCTTCCCCCATACCTACTGCTTTTTGTATGAGCCATTTTGTATAAATTATTTATAT	101	137
NM_001106083.1	Rattus norvegicus inhibitor of growth family, member 2 (Ing2), mRNA	2738	TT	TT	TT	2	38
NM_001107267.1	Rattus norvegicus large tumor suppressor kinase 2 (Lats2), mRNA	4958	TG	TT	TGTCTGGTGTGGAGAGAGAGTACTGCATGAGCAGAGCTTCCTAGTCTAAAGTTACCGTATCTTGCCATTCACAGCAGGTCCTGTGAATACGTTTT	95	131
NM_001033986.1	Rattus norvegicus RT1 class I, locus CE5 (RT1-CE5), transcript variant 2, mRNA	1634	AG	TT	AGTATTGGGAGCAGCAGACACAGATCGTCAAGGGACACGAATGGAGTTTCCGAGTGAGCCTGAGGAATCTGCTAGGCTACTACAACCAGAGCGAGGGCGGCTCTCACACACTCCAGGTGATGTCTGGATGTGACATGGGGTCGGACCAGAGCCTGCGCCGCGGGTATGAGCAATACGCCTATGACGGCCGCGATTACATCTCCCTGAACGAAGACCTGAAGACGTGGTCGGCTGCGGACTTGGCAGCACAGATCACTCTAAACAAGTGGGATCAGGCTGGTGAATTAGACTATTACAAGGCCTACCTGGAGGGTCCATGCCTGGAGTGGCTTCTCAGATACCTGGAGCACGGGAAGGAGACACTGATGCGCTCAGATCCCCCAAAGGCACATGTGACCC…	1241	1277
NM_001106957.1	Rattus norvegicus glyoxalase domain containing 5 (Glod5), mRNA	699	AA	AT	AAAGCACTGTGTTTCGGAGACCAAAAAT	28	64
NM_001107528.1	Rattus norvegicus HD domain containing 3 (Hddc3), mRNA	1582				0	-
NM_001100702.1	Rattus norvegicus WD repeat domain 47 (Wdr47), mRNA	4102	GT	TC	GTAACATTTTCCTC	14	50
NM_001198584.1	Rattus norvegicus family with sequence similarity 98, member C (Fam98c), transcript variant 1, mRNA	1296	TG	TC	TGGCGGCCTGCGCCTGCTGCGGTTTCTTTGCTCTGAGCTCCAGGCTGCTCGCCTCTTGCATCTAAAGCTCCAGCGTGATCCTAGCCCTGTGCCGTCCTTTGGAGAAGGCACGAAGGAGGGAAATGACGTGGTTCAGGAACTGATGCTAACTC	152	188
NM_001109173.1	Rattus norvegicus G protein-coupled receptor 150 (Gpr150), mRNA	2137	CG	AA	CGGGAGGAGCGGGACCAAGGCGGCCTGCGCCCACCCCCGCCACGCCCCAGACCTCTGCCCTGCTCCTGTGAAAGTGCCTTCTAGGAGCTGCTGCACAGACAGGTCGTTTGTCACTGTGGCACAGACTTCAGACAACACAGGATGTAAGTGGTCTGCCTAAATCACGAATAGTGGAACTGTCTGCAGGAACCACTGAAACTGCCCGCATACTTTATGCGACAGTTATTTCCTTCTAA	236	272
NM_001127525.1	Rattus norvegicus transmembrane protein 50A (Tmem50a), mRNA	1055	GA	GA	GAGTCTGGTTGCCTGTGGCTGTTTTGTTTTCTTGCAGAACTGGAGTGAACAGAGGCTGCCAAACGCGCCGCGACATCGGACTTGGACTGACCTGAAAAGATGTCTGGATTTCTAGAAGGCTCCAGGTGCTCCGAGTGCATGGACTGGGGGGAGAAGCGGAACACAGTTGCCTCCATCGCCGCTGGCGTTCTCTTTTTCACAGGATGGTGGATCATCATAGACGCGGCTGTAATGTACCCCAATATGGAGCAATTCAACCACTCATACCATGCTTGTGGCGTCATAGCAACCATAGCCTTCCTCATGA	307	343
NM_001044234.2	Rattus norvegicus oxysterol binding protein-like 9 (Osbpl9), mRNA	2791	GT	TC	GTGACCAGGGCAGTAGGCGTAACTAAGCAACAATCGATCTTCAGGAGAACTTGTCACTTCCTTC	64	100
NM_001005880.1	Rattus norvegicus C-type lectin domain family 4, member A2 (Clec4a2), mRNA	790				0	-
NM_001107313.1	Rattus norvegicus CCR4-NOT transcription complex, subunit 7 (Cnot7), mRNA	2614	CT	CC	CTTCCTTTTACTCCATCACTTTTACCC	27	63
NM_001034127.1	Rattus norvegicus ALG8, alpha-1,3-glucosyltransferase (Alg8), mRNA	2013	AC	CA	ACACTATTCCCTCTTCCCTCTGCTCTTCACTGCACCAGAACTCCCCA	47	83
NM_001013077.1	Rattus norvegicus pleckstrin homology domain containing A3 (Plekha3), mRNA	1720	CT	AA	CTTCCTCTGAGTGTCGCTATGCAAAAGCTGCTGTAA	36	72
NM_001034952.1	Rattus norvegicus solute carrier family 66 member 3 (Slc66a3), mRNA	1929	AA	CT	AAGTCTGTCACCAAAGCTGAATGATGGATGTATTCTTTCTACACACAGTGGACTTCAAATGACCAAATCAGAGGATGCACCACTGCTTTTCATTGCTACCT	101	137
NM_001130543.1	Rattus norvegicus ribonucleotide reductase regulatory TP53 inducible subunit M2B (Rrm2b), mRNA	1204	AG	GC	AGGAGGGTGAGCAATTGTGTCCAGAGACAAAAGAAAACGAGGTGAGGTCAAATGAAGAGCCACTCCTCAGAAAGAGTTCCCGACGGTTTGTCATCTTTCCAATCCAGTACCCTGATATTTGGAAGATGTATAAGCAAGCACAGGCATCTTTCTGGACAGCAGAGGAGGTTGACTTGTCCAAGGACCTCCCTCATTGGAACAAGC	204	240
NM_001107407.1	Rattus norvegicus cadherin 5 (Cdh5), mRNA	2550				0	-
NM_001014012.2	Rattus norvegicus histidyl-tRNA synthetase 2, mitochondrial (Hars2), mRNA; nuclear gene for mitochondrial product	3089	AA	TG	AAAGGAGACTCTGAATGTGGGTAGTGTGGCTGCTGGTGGGCGCTATGACAGGCTGGTAGCCCAGTTTGATCCCAAGGGACATAGCGTGCCTTGTGTGGGGTTGAGCATTGGAGTAGAGAGAATCTTCTATCTTGTGGAGCAGAAGATGAAGATTTCTTGTGAGAAGGTTCGAACCACAGAGACCCAAGTGTTTGTGGCCACGCCCCAGAAGAACTTCCTCCAAGAGCGTTTGAAGATAATTGCACAGCTTTGGGATGCAGGGATCAAGGCAGAGATGCTTTATAAAAACAACCCTAAACTG	301	337
NM_001106879.1	Rattus norvegicus EF hand domain family, member B (Efhb), mRNA	2654	AC	TA	ACAATCCTGAGACCAGGTGACAAAGTTTCTGACCAGTATAAGACAACTTCTTCTGAGATCAATGCTGTTGTTGGAGCTGTTCCTTCTATATGTTACCCCATCTATGGTGTTCCAACCATTCGCTCTGACATCCCTGCTCCCCGTATTCGTCGAGTCAGTGACATGAATAACTACGGTGAAGAAGGCAATGCCTACGCCTTGCTGCACCCCTCCATCTTCTCGCAGAAAGGTGTATTCGAGAGAGACTTCTTCAAAACCAGGTCCAAGGAAGAGATTTCAGATATA	285	321
NM_001014158.1	Rattus norvegicus zinc finger protein 52 (Zfp52), mRNA	2957	AG	TC	AGAGAAACCTTACAAATGTAGAGAATGTGAGAAATCCTTTACTCAGTGCTCAACTCTAAGAGATCATCAGAAAATTCATACTGGAGAGAAACCTTACAAATGCAAAGACTGTGACATATCCTTTCTGTGGATTTCAAGTCTTAGAAGACATCAGAAAATTCATACTGGAGAGAAACCTTACAAATGTAAAGTCTGTGGCATATCCTTTCTGTGGATTTCAAATC	224	260
NM_001106641.2	Rattus norvegicus Ras-related GTP binding D (Rragd), mRNA	1473	AA	TG	AAGGCCATCCATGAAGTCTTCGAGGTGAGGATGAAGATGGTGAAATCTCGGAAGGCCCAGAGTCGGTTACCCAAGAAGACTGGAGCTACTCCCAATGGGACTCCTCGGGTGCTGCTGTAAGGGGAGCCGTCAGGAGCCAGAGCCCAGACCTCAGTGAGGAGGCTG	165	201
NM_001109380.1	Rattus norvegicus calpain, small subunit 2 (Capns2), mRNA	943	CA	AT	CAGCAATTTACACAGCTGGCTGGACCCGACATGGAGGTGGGTGCCGCCGACCTGATGAACATTCTCAACAAGGTCCTCTCTAAGCACAAGGAGCTGAAGACGGACGGTTTCAGCCTTGACACCTGCAGGAGCATCGTGTCTGTCATGGACAGTGACACGACTGGGAAACTGGGCTTTGAGGAAT	184	220
NM_001107432.1	Rattus norvegicus contactin associated protein family member 4 (Cntnap4), mRNA	4849	GG	CT	GGAGACAGGCCATTTTGGAATGCAGCTTCCT	31	67
NM_001011937.1	Rattus norvegicus double C2-like domains, gamma (Doc2g), mRNA	1487				0	-
NM_001109136.1	Rattus norvegicus vanin 3 (Vnn3), mRNA	1753				0	-
NM_001126274.1	Rattus norvegicus transmembrane protein 129, E3 ubiquitin ligase (Tmem129), mRNA	2372	GG	TT	GGTGCCACTCTAGTGTGAAGGCCTTTTCTAGGGTGTCTTGGTGACTGTAGCCAGCCAAGGGACCACTTCTTGGTAGGAAGGCAAGGGCAGCAACCTAGTCCATCCAGTACAGAGTACCCTCCCAAGTTACTCATGAGGCTTGCATATGTTTTAGAGGATCCACAATACTTTTGGGGTCTTGCTTCTCCAGTCCTGGGAAGGATTTTAGGGAAGCCAAGGAGAAGAGAGCCACAGTACTACCCAGAAAGAAACCCACCAGGAATGCAGTACAGGGTGAGCCAAGGCCCTGTGGGGAGCTTGGCTCAGGAGAGGATACCTCAGTGGTTAGGGTTCTGATGGACTACTACTCACATATCTATGGAACAGATGGGTGGGGAAAAGGCTGCCCTTTACCCTCCA…	642	678
NM_001014014.1	Rattus norvegicus proteasome activator subunit 3 interacting protein 1 (Psme3ip1), mRNA	1738	TC	TT	TCTCTGTACGAACGGCTGCAGGAACAGAAAGACAGGAAGCAGCAGGAGTATGAGGAGCAGTTCAAATTCAAAAACATGGTAAGAGGGTTAGATGAAGATGAGACCAACTTCCTCGACGAGGTTTCTCGGCAGCAGGAGCTGATAGAGAAGCAGCGACGAGAAGAAGAGCTGGAGGAGCTGAAGGAGTACAGAAGTAATCTCAACAAGGTTGGAATTTCTGCAGAAAATAAGGAAGTAGAGAAGAAGCTGGCTGTGAAACCCATAGAAACCAGGAGCAAGTTCTCCCAGGCAAAGCTGTTGGCAGGAGCTGTGAAGCATAAGAGCTCAGAGAGTGGCAATAGTGTGAAAAGACTGAAACCAGACCCCGACCCAGATGACAAGGCTCAAGAGGCCCCGAGC…	721	757
NM_001106176.1	Rattus norvegicus carboxylesterase 4A (Ces4a), mRNA	2437	TA	GT	TAGGTGCTCCTGACTGCCTTCAGGCCATAGCTGGAGCCCTTGTCCATCTTTGGGGCTTAGCACCACCAGTCTAGCCTGATGTCCCATGACACTTTATATCTCACTGT	107	143
NM_001008313.2	Rattus norvegicus chromobox 3 (Cbx3), mRNA	1745				0	-
NM_031567.1	Rattus norvegicus nuclear factor I/C (Nfic), mRNA	1565				0	-
NM_001107738.1	Rattus norvegicus ITPR interacting domain containing 2 (Itprid2), mRNA	5206	AA	GA	AATGTGGAGCAGGACGAGCTGCAGCAGGTCATCCGCGAGA	40	76
NM_001008510.1	Rattus norvegicus interferon stimulated exonuclease gene 20 (Isg20), mRNA	817				0	-
NM_001130061.1	Rattus norvegicus tRNA methyltransferase 44 (Trmt44), mRNA	3136	AG	AT	AGCAGGGCAGCTACCATGGGCTCTCAGGCCCAGCTGGTAAGAACCCGCAGAGCTTGCTCCTGCCTCTTCCCTTGACACTTTCGTAGCCCCAGCTCCCAGAGCAGTGATGGCCGTCTACCACTCTCTCGGATGGACTAGGTTGTGTGTCCTCAGGAACTCAGAGAGGAGCAGTCTCTGTCCTCTCATTAGCCCTACCTGTAATTGCCTTTTCTCCCAGGTCCACAGGGGCCTAGAAGCTATAGAGCTCCTTTCCAGCTTGGCCTCTTGTCTGAAAGGCAGCGTTTGGTCTCAGGCCCTGTAGGTGCTTGGAAATCTAATGATTCCCAAGAAT	331	367
NM_001013124.1	Rattus norvegicus uracil-DNA glycosylase (Ung), mRNA	1855				0	-
NM_001100979.1	Rattus norvegicus similar to human chromosome 9 open reading frame 50 (C3h9orf50), mRNA	1535				0	-
NM_001107441.1	Rattus norvegicus centriole, cilia and spindle-associated protein (Ccsap), mRNA	1069				0	-
NM_001106766.1	Rattus norvegicus RNA polymerase mitochondrial (Polrmt), mRNA; nuclear gene for mitochondrial product	3745				0	-
NM_001105900.1	Rattus norvegicus CGG triplet repeat binding protein 1 (Cggbp1), mRNA	4303	AA	TT	AAATGCTTTTAGAGCTTGAGCTCTCTCGGAGAAATGACTGCTCAAATTACATTCTACTTGTATGTGAAATAATTGCCTAAACTTCACTTCCTCAAGGTCTCTTTTTCTCCTTT	113	149
NM_023955.1	Rattus norvegicus secretory carrier membrane protein 2 (Scamp2), mRNA	2355	AA	TT	AAGTGGAGGGTTTACACTGAGTGCCGCTGGGTCTGAGTGACCGAAGGCAGTAGCGTTCGCGGAGATCGCCCGCTGGCCCTCGATCACCATGTCGGCCTTCGACACTAACCCCTTCGCGGACCCAGTGGATGTAAACCCCTTCCAGGATCCTTCTGTGACCCAGCTGACCAGTGCTCCTCAGAGTGGCCTGGCTGAGTTCAATCCCTTCTCAGAGACAAATGCAGCGACAACAGTTCCTGTCACACAACTTCCTGGGCCCTCCCAGCCAGCAGTTCTCCAGCCCTCAGTGGAGCCAGCACAGCCATCGCCCCAGGCTGTTGCGGCTGCAGCCCAGGCAGGCCTGCTTCGGCAGCAGGAAGAGTTAGACAGGAAAGCTGCTGAGCTGGAACGCAAGGAGCG…	1271	1307
NM_001004242.1	Rattus norvegicus Rho GTPase activating protein 8 (Arhgap8), mRNA	1543	GC	CC	GCCTCACCATACCTGTCTCGCCTCCGTATCCCCTGAGTAGCTGGAGACACC	51	87
NM_031331.1	Rattus norvegicus proteasome 26S subunit ubiquitin receptor, non-ATPase 4 (Psmd4), mRNA	1334				0	-
NM_001012021.2	Rattus norvegicus zinc finger and SCAN domain containing 21 (Zscan21), mRNA	2218	GA	AG	GAGCTCCACACTGGTCACCTCTACCAGCAGGGTCCCTCCTCACACTCCAGGCTCCAGTGTACTGTGTGTCCAGTATAG	78	114
NM_001106570.1	Rattus norvegicus PHD finger protein 19 (Phf19), mRNA	3789	TG	TT	TGGAAGGAGAGTTGTAAAGCCAACTCCCAGGCCAGCAGGCATGTGGGAACTGGGGTCAAGTTTGTGGCTTCCTGTTGGCTTCTGTGAGCACGGCAACCTCCAACATGTGTTTTCCAGGCTACTGGGGAAGCCAGAGAGTTTAGGATGGCTGTTTGTACATCTGTCCCTCCTCCCCTGCTGTGCCCCAGAAGCTCTAGGCCTGAGGAGCAGGAAGGCAGGTGGGGTGCTCATCCCGCTGGGGAAGCTAGCACAAGGCCTGACCAGGTCCTGGACTCCTCAAGGCAGCATTTCACCCCTACATGACAATAGCTGCATTACTGCCAACCGATGGTACGACCCTGTGCACCTTTGAAGAGATTCTGGTT	365	401
NM_001126276.1	Rattus norvegicus zinc finger protein 579 (Zfp579), mRNA	2168	TT	TC	TTTGCAGTAAGGAAGAGGGAAACTGAAGGAGAGGAGCTTCCTCTGCCTCCCCTGAGCCCTGGGTCATTCACCTTCTCCTTTACCCACCCCTAGACCCCTGATGCTGGTTAGGAACCTCTCACCCCAACACATGTC	135	171
NM_001106371.1	Rattus norvegicus helicase, lymphoid specific (Hells), mRNA	3164	CT	AG	CTAATCAGGGAG	12	48
NM_001106064.1	Rattus norvegicus calcium homeostasis endoplasmic reticulum protein (Cherp), mRNA	4084	AG	GT	AGCCCCTCCACCTAGTGCAGCACCTCAGCTTGGGGCTTCTGCCTGGGGAAGCCAATACCAGCGCAGAGCATGGAGTGCTGGGCTCCAGCCAGCCAGCACCTCCTGTGCTGTTGT	114	150
NM_001011953.1	Rattus norvegicus phosphatidylinositol glycan anchor biosynthesis, class K (Pigk), mRNA	1557	AG	CT	AGGCTTCATCCTGGGGCTGTGGGCGCTCATCATCATGGTCTTCT	44	80
NM_001135698.1	Rattus norvegicus yippee-like 3 (Ypel3), mRNA	943				0	-
NM_001106860.1	Rattus norvegicus serine peptidase inhibitor, Kazal type 8 (Spink8), mRNA	675	AG	TG	AGAGCACATGGAGCATGATTGACTCTTCGAAGATACCCAATTCGGGAGACAGGGTCTGGCGTTCAGTGGTAGAGTGCACTAGTGTGCAGGAAGCCTTGGGGAGTG	105	141
NM_001007681.1	Rattus norvegicus zinc finger protein 219 (Zfp219), mRNA	2830	AG	TG	AGAGGCAGGTCTTGGGGGTCAAGAACGGTAGGGAGCCCTCTTAGGAGTGATTAGTGTAGTAAGCTTACCCCGCGGGAGCGGGGAGTGCTAGAGGTAGTTGGGTAGAGCAGCCAGCAGGGAGCAGTGTGGGACCCGTATCCCAGCCCAAGGTGGACCAAGAGGTAAAGTGGGCAGTGGGTGAAGGAGAGTGGGCAAGCAATACCCACCCAGCCCAGAGGAGTCACAGTGCCTTAGACGTGGCAGAGGTGAGGGTCAAAGAACGGGGTCCTAGGGCTGGTAGAGGATGTGCTGCTG	294	330
NM_001013429.1	Rattus norvegicus claudin 14 (Cldn14), mRNA	1549	GC	GT	GCGCTCATGGTCATCTCCTGCCTGCTGTCGGGCATGGCCTGCGCCTGCGCCGTAGTGGGCATGAAGTGCACTCGCTGTGCCAAGGGCACACCCGCCAAGACCACCTTCGCGGTGTTGGGAGGCGCGCTCTTCCTGCTGGCAGGCCTGCTGTGCATGGTGGCTGTGTCCTGGACCACGAATGATGTGGTGCAGAATTTTTACAACCCTCTGCTGCCCAGTGGCATGAAGTTTGAGATCGGCCAGGCCCTGTACCTGGGCTTCATCTCCTCATCCCTGTCTCTCATCGGGGGCACCCTGCTCTGCCTGTCGTGCCAGGACGAGGGCCCCTACAGACCCTACCAGCCCCAGTCCAGGGCTGGGGCCACCACCACAGCCACCGCCCCTGCCTACCGCCCACCA…	655	691
NM_001012030.1	Rattus norvegicus zinc finger protein 281 (Zfp281), mRNA	3114	CG	CT	CGGCGTCAGCCGCGGCCTTCCCTTCGCAGAGGACCTCCTGGGGATTCTTGCAGTCCTTGGTGAGCATCAAGCAGGAGAAACCTGCGGATCCTGAGGAGCAGCAGTCCCACCACCATCATCACCACCACCACTATGGGGGGCTGTTCGCTGGGGCTGAAGAGAGATCACCAGGCCTAGGAGGAGGGGAAGGGGGGAGCCACGGCGTCATCCAAGACCTCAGTATTCTCCACCAGCATGTCCAGCAGCAACCAGCCCAGCATCACCGCGATGTATTACTGAGCAGCAGCGGTAGCAGGACTGATGACCATGGCAACGAGGAGCCAAAGCAGGACACTAACGTCAAAAAGGCAAAGAGGCCAAAGCCAGAATCTCAGGGAATCAAAGCCAAGAGGAAGCCAA…	1083	1119
NM_001106109.2	Rattus norvegicus neurensin 1 (Nrsn1), mRNA	1406				0	-
NM_001106698.1	Rattus norvegicus hexose-6-phosphate dehydrogenase (glucose 1-dehydrogenase) (H6pd), mRNA	4724	GA	CC	GAAGCAGTGTGCTTTATGCCACCAATCAGTCACATCTGTGTATAAATCTGAGTCTTGAGTCTCAGGAAGGATTTCTCGGCC	81	117
NM_001013080.2	Rattus norvegicus chloride intracellular channel 3 (Clic3), mRNA	792				0	-
NM_001008352.1	Rattus norvegicus phosphomevalonate kinase (Pmvk), mRNA	1000				0	-
NM_001106017.1	Rattus norvegicus myosin light chain 7 (Myl7), mRNA	577				0	-
NM_001012000.1	Rattus norvegicus phospholipid scramblase 4 (Plscr4), mRNA	1879	GT	AC	GTCACTGACTGCCTGGGCCGAGAGATCATGACCATGCAGAGGCCTTTCCGATGCACCTGCTGTTGCTTCTGCTGCCCCTGTGCGAGGCAAGAGTTAGAAGTGCAGTGTCCTCCTGGAGTCACCATTGGCTTTGTGGCAGAACACTGGAACTTATGCAGAGCCTCTTACAGCATCCAGAATGAGAAGAAAGAAAGTGCGATGAGAGTTCGTGGTCCATGTGCGACCTATGGCTGTGGCTCTGATTCTGTTTTTGAGGTCAACTCTCTAGATGGAGCATCTAACATTGGCAGTATTATCAGGAAGTGGAATGGCTTTTTATCAACGATGGGAAATGCAGACCACTTTGAGATTCACTTCCCTTTGGCCCTGGATGTGAAAATGAAAGCAATGATCTTCGGC…	700	736
NM_001107585.1	Rattus norvegicus ubiquitin like with PHD and ring finger domains 2 (Uhrf2), mRNA	3583	TG	GG	TGATCTGCGTGCTTCTGTGTCGTTCCTGGTGGATTTTTGGACAATAACAAGTCTAAAAATGAGTGGGGAGGG	72	108
NM_057115.2	Rattus norvegicus protein tyrosine phosphatase, non-receptor type 12 (Ptpn12), mRNA	3167	TG	AT	TGCCGCCCATCCTGACACCGTCGCCTCCTTCAGCATTCCCAACCGTTACCACTGTGTGGCAAGACAGTGACAGGTACCACCCAAAGCCAGTGCTGCACATGGCTTCCCCAGAGCAGCCCCCAACGGACCTCAACAGAAACTATGATAAGTCAGCGGACCTAATGGGGAGAAGCGAATCTGCTGTTGAGCACACAGATAAAAAGTTAGAACAAAAT	215	251
NM_053702.3	Rattus norvegicus cyclin A2 (Ccna2), mRNA	1730	AG	TG	AGCCAGAAAACCACTGGTACCTCTTGATTATCCAATGGATGGTAGTTTTGAATCACCCCATGCTATGGATATATCTATTGTCTTAGAAGACGAAAAGCCAGTGAATG	107	143
NM_031670.2	Rattus norvegicus napsin A aspartic peptidase (Napsa), mRNA	1434	GC	GT	GCAGTACCTCATTCAGTGTTCCAAGATCCCAGAGCTCCCCACTGTCTCCTTCTCCCTCGGTGGAGTCTGGT	71	107
NM_001004254.1	Rattus norvegicus mitochondrial translational initiation factor 2 (Mtif2), mRNA; nuclear gene for mitochondrial product	2259	GA	AG	GACATGCTGCTTTCTCAGCAATGAGAGCTAGAGGAGCTCAGGTCACTGACATTGTTGTGTTGGTTGTAGCTGCAGATGATGGGGTAATGAAACAAACTGTGGAATCCATTCAGCACGCCAAGGATGCAGGAGTTCCTATTATCCTTGCAATAAATAAATGTGACAAGACAGATGCTGATCCTGAAAAGGTGAAAAAAGAGCTCCTGGCTTATGATGTGGTGTGTGAAGAGTATGGTGGTGATGTTCAAGCAGTGCACGTCTCTGCACTAACAGGAAAGAACCTGATGGCTTTGGCAGAAGCAACAATTGCTCTCGCAGAAATGTTGGAACTGAAAGCAGATCCCACAGGCCCAGTGGAAGGAACAGTAATAGAGTCTTTCACAGACAAAGGAAGAGGTC…	510	546
NM_001106495.1	Rattus norvegicus ER membrane protein complex subunit 4 (Emc4), mRNA	1423	AT	TT	ATCCTGGTGGAGAAGCGCTGCTGGGACATCGCCCTGGGTCCCCTCAAACAGATTCCCATGAATCTCTTCATCATGTACATGGCAGGCAATACCATCTCCATCTTCCCTACCATGATGGTGTGTATGATGGCCTGGCGACCCATCCAAGCACTTATGGCCATTTCAGCCACTTTCAAGATGCTGGAGAGTTCAAGTCAGAAGTTTCTTCAAGGTTTGGTCTATCTCATTGGGAACCTGATGGGTTTGGCATTGGCTGTTTACAAGTGCCAGTCCATGGGTCTGTTGCCTACACATGCATCAGATTGGCTGGCCTTTATTGAACCCCCTGAGAGAATGGAATTCAGTGGAGGAGGACTACTTCTGTGAACCTGAGAAAGAAAGCACCATGCTTATGGACCT…	409	445
NM_001107542.2	Rattus norvegicus ubiquitin specific peptidase 47 (Usp47), mRNA	5691	CT	TG	CTGCAGCTCTGCTGTCTGCCAAGGCTCTTTGCCTCTCATCCGTCATGCACATTGTGTACCCTGAAGCCTAGCAGTCCGTCTGTGTACTCCTCATTGAACGCCATAGGATGTATTTGCTTG	120	156
NM_001034911.1	Rattus norvegicus ubiquitin family domain containing 1 (Ubfd1), mRNA	1235	TT	TT	TTCCCTTTCTTGCAGTCAGCTTCATACCGTTT	32	68
NM_001013979.1	Rattus norvegicus MAP3K7 C-terminal like (Map3k7cl), mRNA	1681	CT	CA	CTCCCACATCTTCCGCCGCCCATCTTTGTTTTGTGTCTGTTTCCAGTCACGTGACTCCTTTTTCA	65	101
NM_001100813.1	Rattus norvegicus claudin 12 (Cldn12), mRNA	3480	GG	TA	GGCTGTTCTTCAGATGGGGTGGGTAACGTCTTTTGTTGCTAAAAAGCTGTTGGTTTTGAAGGCCTTCCATGGAGCCAGTGTGTCAGACAACCTTGAATGTGAGATGGCGCAGCAAGTCTGTGTCACCCACCTTTGGGAGAAGAGTAAGCCTAAGATCCCAAGTTCACTCTGCGTGTACATACGCCCTGTGATGGATAGCGTGTGCTGTAAACCACAAGGTAGAGACCTCAGTGGGTGTGCTGTGCTGCTGCCTCACGTTTA	261	297
NM_001108557.2	Rattus norvegicus S100 calcium binding protein A16 (S100a16), mRNA	1036				0	-
NM_001106228.1	Rattus norvegicus ERCC excision repair 1, endonuclease non-catalytic subunit (Ercc1), mRNA	1069	AG	TC	AGACAGCCCCAGCCAGACTCTGAAAGCAGGAACAAAATCCAGTAGCATCATCGTGAGCCCGCGGCAGAGGGGCAACCCCGTGTTGAAGTTTGTTCGCAGTGTGCCCTGGGAATTCGGTGAGGTGACTCCTGATTATGTGCTGGGCCAGAGCACCTGCGCCCTTTTCCTCAGCCTCCGCTACCACAACCTGCATCCAGACTACATCCATGAACGGCTGCAGAGCCTGGGGAAGAACTTCGCCCTGCGTGTGCTGCTGGTCCAGGTGGATGTGAAAGATCCCCAGCAGGCTC	290	326
NM_001107366.1	Rattus norvegicus minichromosome maintenance 10 replication initiation factor (Mcm10), mRNA	3945	AC	CC	ACATAGATGGTTGAGGCTCTGAGGAGCCAAAGATTCAGGCTCATGGCTGGGTGCCCTACAGTTTTGTCTGTGCTCTGTGAGGGCCAAAGGGGCTGACCTTGGTAGTCCTGTTCCCC	116	152
NM_001106258.2	Rattus norvegicus TBC1 domain family, member 17 (Tbc1d17), mRNA	2181				0	-
NM_001113749.1	Rattus norvegicus hypoxia inducible factor 1 subunit alpha inhibitor (Hif1an), mRNA	1363				0	-
NM_001106913.2	Rattus norvegicus CDC-like kinase 1 (Clk1), mRNA	1791				0	-
NM_001025403.1	Rattus norvegicus RNA binding motif, single stranded interacting protein 2 (Rbms2), mRNA	1309	AC	AC	AC	2	38
NM_001128184.1	Rattus norvegicus beta-1,3-glucuronyltransferase 3 (B3gat3), mRNA	1574	AC	TT	ACAGAGAAACCGAAGATGAAGCAGGAGGAACAGCTACAGCGACAGGGCCAGGGGTCAGACCCAGCTATTGAGGTGTGATGGCAATCTCACCCTGACTTCTACCTTATTTTAGGCACATACCTTGTGGGACTGGGCTCCAGGCCAGCCCAGGATGTGGCTTTTTTTTTTT	169	205
NM_001105915.2	Rattus norvegicus acetylserotonin O-methyltransferase-like (Asmtl), mRNA	894				0	-
NM_001106842.2	Rattus norvegicus SUMO specific peptidase 6 (Senp6), mRNA	4514	AT	AT	ATGATAGCAGCGATGACGGGCTCCTTGCTGATGAAAACTACAATTCAGAAATAGGACAGTGGCAT	65	101
NM_001107597.1	Rattus norvegicus doublesex and mab-3 related transcription factor 2 (Dmrt2), mRNA	2331	AA	TC	AATTTCTCCCCCATTGTTGATATGGACTGTCTGGCAGCTCAAGGGCACGTC	51	87
NM_001107600.1	Rattus norvegicus F-box and WD repeat domain containing 4 (Fbxw4), mRNA	1928	TA	AG	TACCAGTCGCCTCCTCAGTCACATGGTAACTTGGCCGACATCTTGGAGCTGGGGGCTCCTATCTGAGGTACTAGTCTGGTTTTGCTTTGAAG	92	128
NM_001015014.1	Rattus norvegicus surfeit 6 (Surf6), mRNA	2049	AC	GT	ACTGACGGTCCTGGGTTGT	19	55
NM_001008855.2	Rattus norvegicus RT1 class Ib, locus N3 (RT1-N3), mRNA	1827	CA	AT	CACCCCAGACCTGAAAGTGATGTGACCCTGAGGTGCTGGGCCCTGGGTTTCTACCCTGCTGACATCACCCTGACCTGGCAGTTGAATGGGGAGGACCTGATCCAAGAAATGGAGTTTGTGGAGACCAGGCCTGCAGGGGATGGAACCTTCCAGAAGTGGGCATCTGTGGTGGTGCCTCTAGGGAAGGAGCAGAAGTACACATGCCTTGTGGAGCATGAGGGGCTGTCAGAGCCGCTCACCCTGAGATGGGAGCCTGCCCAGGACTCCACCACTACAATCATTCTAATTATTCTACCCACTGTCTCTGCAATTGCCCTCTGCGTTGCTGCTGTGGCAACTTGCATATGCCTGAAGAAGAAGGCAGGTGAAAGAGGAAGGCACGACACCCAGGAAGCAGAT…	807	843
NM_001108899.1	Rattus norvegicus C-type lectin domain family 3, member A (Clec3a), mRNA	623				0	-
NM_001106125.1	Rattus norvegicus sperm associated antigen 6 (Spag6), mRNA	1736	GT	TG	GTTCTATCCTCCAAGAGTACATCAACAACATCAACAGCTGCTACCCAGAGGAGATAGTGAGGTATTATTCTCCTGGATACTCAGACATCCTTCTGCAGAGGGTGGACAGCTATCAGCCCCTCGCTAACTGAATGAAGTGATCCCAATACCCAGGTTCACAGGAGAGTGAGGATAACAGTTG	181	217
NM_001013184.1	Rattus norvegicus high mobility group nucleosome binding domain 1 (Hmgn1), mRNA	1235	CG	GA	CGCCGCCACGATGCCCAAGAGGAAGGTTAGCGCAGATGGAGCGGCGAAGGCGGAGCCCAAGCGCCGCTCCGCGAGGCTGTCGGCCAAGCCCGCCCCTGCCAAGGTGGACGCGAAACCGAAAAAGGCCGCGGGAAAGGATAAAGCATCAGACAAAAAAGCACAGATAAAAGGGAAGAGGGGAGCGAAGGGCAAACAGGCTGAAGTGGCTGACCAGCAAACTACAGATCTGCCTGCAGAAAATGGAGAGACGGAAAACCAGAGTCCAGCCTCTGAGGAAGAGAAAGAAGCGAAGTCTGA	297	333
NM_001107259.1	Rattus norvegicus pellino E3 ubiquitin protein ligase family member 2 (Peli2), mRNA	3547	AA	CT	AAGGAAGTGGTAGAAGAGAAGCAGCCCTGGGCGTACCTGAGCTGCGGTCACGTGCACGGCTACCACAGCTGGGGCCATCGGAGCGACGGCGAAGCCAACGAGCGGGAGTGTCCCATGTGCAGGACTGTGGGCCCCTATGTCCCCCTCTGGCTGGGCTGTGAGGCAGGGTTTTATGTCGATGCAGGACCTCCAACTCACGCTTTCACCCCCTGTGGGCACGTCTGTTCGGAGAAGTCCGCAAAGTACTGGTCCCAGATTCCACTGCCCCACGGAACCCACGCATTTCACGCCGCCTGTCCGTTCTGTGCCACGCAGCTGGTTGGTGAACAAAACTGCATCAAATTGATTTTCCAAGGTCCAGTGGACTGACACCCTGGACGACCGTCTACATGACGATAA…	574	610
NM_020302.2	Rattus norvegicus ADAM metallopeptidase domain 3A (Adam3a), mRNA	2497				0	-
NM_001105966.1	Rattus norvegicus cellular repressor of E1A-stimulated genes 1 (Creg1), mRNA	2091	CA	GT	CATTCTGTATCTTGAAGCTCCTGGTGCTGCCGCCTGCGTCCTCTGTGGGATGTACCACGGTACTGTGGCATAAAAACAAACTACAACAACAACAAAACATGTCTCTGCACCAGAGGATGGCTCAGCTTGTAAGATGACTGCTCTAGCAGAGGACCCAAGTTCAGTACCCGCAAGGGGTCAGACAGGCACATATGCCCAGAACTCCAGCTCCAGGAGATCAAATACCTCTAGCCTCCAAGGTCACCTGCACTGGAATACACACACCCACACATAGACACACAGCGACACAATTTCAAACAGTACATCTTTTATTCCAAAGAGGTACTACTTAGT	333	369
NM_001006980.1	Rattus norvegicus B-cell receptor-associated protein 29 (Bcap29), mRNA	1767	TT	GT	TTTTCATGCAAATATTCATGTAAAAGTAGTGATTGTAATAATATGATGTAGGTTATTTCATTGT	64	100
NM_001012461.1	Rattus norvegicus DNA nucleotidylexotransferase (Dntt), mRNA	1851	GC	GC	GCCTTCGCCCTGCTCGGGTGGACTGGATCCAGGCAATTTGAGAGAGACTTGCGGCGCTACGCCACACACGAGCGGAAGATGATGCTGGACAACCACGCTCTGTATGACAAGACCAAGAGGGTGTTTCTTGAAGCAGAAAGTGAAGAAGAGATCTTTGCCCATCTGGGATTGGACTACATTGAACCATGGGAAAGAAATGC	200	236
NM_133323.1	Rattus norvegicus zinc finger protein 111 (Zfp111), mRNA	2817	AG	GA	AGGGTCCACACAGGAGAAAAAACCCTGCACGGTTAGCAGTGTGGGAAGGGCTTCAGTCAGACCTCACACTTCCGA	75	111
NM_001025276.1	Rattus norvegicus STRA6-like (Stra6l), mRNA	2455				0	-
NM_001106657.1	Rattus norvegicus zinc finger and BTB domain containing 5 (Zbtb5), mRNA	4348	AA	TT	AATAATCATGTACAATCTTCTGGAGATGGCATCGAGTGTAGAGGCGCCCGTCGGGTGCTAATGCTGGTCGAAACATT	77	113
NM_153731.1	Rattus norvegicus zinc finger protein 709 (Zfp709), mRNA	2768	TC	CC	TCCAGCTCCC	10	46
NM_001130728.1	Rattus norvegicus WASP homolog associated with actin, golgi membranes and microtubules (Whamm), mRNA	2849	CC	CT	CCCCCTCCCCGCACCTCGGTCAATGAACAAGTTCTGGCTGCCATCAGGCAGGGGGTGCAGCTGAAGAAAGTCCACACAGGCCCCAATGTGGACCCCAGCAAGAAGAGCACCAGCGACCTGGAGAGGAGCATCAGAGAAGCCCTGGAGAGAATCAAGAAAGTGTCTGCTGACTCAGAGGAGGACAATGATGAACAGAGCCCTGTCGAGTGGGACCGCTAGGCTTTTAGGCTGACAGATGCAGGCAGGCCCAGAACCCTGCCTGGGTCAGCGAGGCTTCCCTGGGAAGCCT	289	325
NM_001107371.1	Rattus norvegicus neuropilin and tolloid like 1 (Neto1), mRNA	3524	AG	TG	AGCAACAGCTGACTTTGCAGATGTGGCAGAAGACTTTGAAAATTACCATAAACTGCGAAGATCATCTTCCAAATGCATCCATGACCATCACTGTGGATCACAACTGTCCAGCGCGAAAGGCAGTCGCAGTAACCTCAGCACAAGGGACGCTTCTATCTTGGCAGAGATACCCACGCAGCCAGTCAAGCCCCTCATCCCACCCGTGAACAGAAGAAACATCCTGGTCATGAAACACAACTACTCACAAGATGCCGCAGATGCCTGTGACATTGACGAGATTGAGGAGGTTCCCACCACGAGCCACAGGCTATCCAGACACGAAAAATCCGTCCAGCGGTTCTGCCTCATTGGGTCTCTAAGCAAACATGAATCTGAATACAACACAACTAGGGTCTAACA…	744	780
NM_001100672.1	Rattus norvegicus tetraspanin 6 (Tspan6), mRNA	1639				0	-
NM_001107395.1	Rattus norvegicus pleckstrin and Sec7 domain containing 2 (Psd2), mRNA	4397	TG	CC	TGTCCCACTCTCTGTATCACGGGGTGGGGGGTGACAACAGAGGTGCAGGTTCGTTAGCCTCAGACACATGTGATTCCCCAAGCACTAGTTGTGCCTCCCATCAGTAAAGACATTTTTTAGTTCGCTTCC	129	165
NM_001107695.1	Rattus norvegicus vacuolar protein sorting 72 homolog (Vps72), mRNA	1334	GC	TT	GCCCCCACCCCCCGAGCCACTCCCTGGCGCTGGGCCCCGAGCCTTGCGTCAGAAGATTGTCATCAAATAGAGGCACCTGACCCCTACCTAAAGTCCCTCTCCTGACCTGGCTCCACTCTGCCCCTCCCTTCCCATCTCTGTCCTTGTTGACCTTTGCCATGGTTTTTCCTCAGGTCCTCCCTAGTCATTTGTTTGCTTGTGCTCTTCGGTTTTTT	215	251
NM_001033998.2	Rattus norvegicus integrin subunit alpha L (Itgal), mRNA	4363	AG	AT	AGTTTGTCTCCTTTCTATAGGCTGCATTTGAGCTCATGCCCTCCTCCCCCAGGGATGCTTCTGCCCCCTCCTGTTCTGGCTAAGGAGGGCTCCACACTGCACCTCACACCAGCCTGTTCTCGCCTCAGTCTGCCAGGTTATATTTATTCTCTCTTTGATGAT	162	198
NM_001011976.2	Rattus norvegicus WD repeat domain 31 (Wdr31), mRNA	1350				0	-
NM_001107745.1	Rattus norvegicus C1q and TNF related 4 (C1qtnf4), mRNA	1348				0	-
NM_001033063.1	Rattus norvegicus ribonuclease P/MRP subunit p38 (Rpp38), mRNA	1300	GC	GT	GCTCTGGAGAGGAATGAACTGCTCCTGGTTCTAGTGTGTAAGTCAGTCAAGCCCGCCATCATCACCTCACACTTGATTCAGCTGAGT	87	123
NM_001100722.1	Rattus norvegicus leucine rich repeat and Ig domain containing 1 (Lingo1), mRNA	2510	GG	AA	GGGAACACTGGGCAGGGAAGGTGCCTGGCTGCTGCCCACTCACCCCCAGGCCTTCCCACCTTTCCCTGCCCTCCTCACACACTCTCCCCTCCCCCCACGCGCCCCCGCTGCCACGCCAGCCTCGCCCTCACCGCCTGCCCTCCTTCTACCAGGATTTCAGAAGGCCAGGCCTGAGGACCCCGCCTACATAGGGGCCAGAGTTGACAGACGAATCCAAAGCCGACGAACCACGCGGCAGAGTCAATAATTCAA	252	288
NM_001107701.1	Rattus norvegicus leucine rich repeat containing 71 (Lrrc71), mRNA	4313	GC	GG	GCAGTCACCCACACAAGGAACCCCTAAGAAAGAAGATGCCCCAAAGGCAGGCAAGGGGAAGGTGACCATCCCTGAGCAGAAGATAAGCAAGGGCAAAGCGACGAAGACGGGGGCCAAAGAGAAGCGCAGCATCCTCCTGGAGTCAGAACAGCTGGTTGTTGAAGCTACAGAGATGG	176	212
NM_001012041.1	Rattus norvegicus interferon regulatory factor 9 (Irf9), mRNA	1630				0	-
NM_001105869.2	Rattus norvegicus replication factor C subunit 4 (Rfc4), mRNA	1265				0	-
NM_001107521.1	Rattus norvegicus interleukin 20 receptor subunit alpha (Il20ra), mRNA	2065	CC	GG	CCGCCTGGCCCCGCGGCCGCCGCTGCTGCCCACGCTGCTTCTGCTGCTGGCAGCTTCGGGACGCGCAGTTCCTTACGCCTTCTGTGGTCTGCCTAAGCCTACAAATATCACCTTCTTGTCTATCAACATGAAGAACGTCCTGCACTGGAGCCGTCCAGAGGGTCTACACGGAGTCGAAGTCACATACACTGTACAATATTTCATATATGGGCAGAGGAAATGGCTGAGTGCCTCTAAATGCACAAGTATCAGCAGGACCTACTGTGATCTTTCTGTTGAGACCTCGGACTATGAGCGTCAGTTCTATGCTAAGGTGAAGGCCATTTGGGAGACCAGGTGCTCTGAATGGGCCGAGACAGAACGCTTCTATCCTTTCTTGGAAACACAAGTCAGCCCACC…	722	758
NM_001106296.2	Rattus norvegicus TLC domain containing 3B (Tlcd3b), mRNA	1729				0	-
NM_001107277.1	Rattus norvegicus leucine-rich repeat LGI family, member 3 (Lgi3), mRNA	3319				0	-
NM_001100502.1	Rattus norvegicus 1,4-alpha-glucan branching enzyme 1 (Gbe1), mRNA	2937	AC	CT	ACGAGTTGAAGCTGAGCCTCATCACAGTGTTGATAATGTGCGATCTTTGCAAAACACGGCTGTCTAGCCAAAACATCAGGCTGGAATTCAACATTGGAATATGTAAACATATAAGTTGCTTATGAAGTAGAAGGGGGGATGTGCT	145	181
NM_001106460.1	Rattus norvegicus protein tyrosine phosphatase, non-receptor type 22 (Ptpn22), mRNA	2747				0	-
NM_001105889.1	Rattus norvegicus transmembrane protein 30C (Tmem30c), mRNA	1291				0	-
NM_001105734.1	Rattus norvegicus dual specificity phosphatase 10 (Dusp10), mRNA	2704	TG	GT	TGGTCTCAGCTCAGCTCACCTCACACCTTCTCTGGGGAGACAGGCTAGCATCGATTTTGTGTGCTCCATGCTCCCGACAACTTTCTCCCTTCTCTGGGTCTGAGAGAACTTTTGTGTGTGTGTGTGTTTGT	131	167
NM_001007632.2	Rattus norvegicus activating signal cointegrator 1 complex subunit 1 (Ascc1), mRNA	1508	AA	TT	AACATT	6	42
NM_001009680.1	Rattus norvegicus 2 ' -5 ' oligoadenylate synthetase 1I (Oas1i), mRNA	1680	CT	CT	CTGACCCAACAGGAAACATTGCTGGTTCGAACCCAGAGGGCTGGAGGCGACTAGCAGGAGAGGCTGCTGCCTGGCTGCGGTACCCATGCT	90	126
NM_001024879.1	Rattus norvegicus aspartyl aminopeptidase (Dnpep), mRNA	1674	GA	TA	GAGACAGCCTGTACCACTGGAGTTCTCCAGACCCTCACCCTTTTCAAGGGCTTCTTTGAGCTGTTCCCTTCTGTAAGCCGTAACCTCTTGGTGGACTGAGGCCTCTTTCCAAGACTTGTCTTCCACCCCTTTGATTGAGAGGGGAGGATCTCAGTTTAGCTGATGCTGGGTTA	173	209
NM_001135897.1	Rattus norvegicus zinc finger protein 707 (Zfp707), mRNA	1874	CC	CT	CCTCCTGTGCTCAGTTGCGGGGAAGAACTGCAGCAGGTGCTGTCAAGGAAGGCCAGATGACTGGTTCACGAACCAGCAGTTTTCACTCCTTGCAACCCTTGTGGCTTTCTGACAAGGGAAGGGATCAGTTACATTGTCAGAGCCAGCAACGGCCGTTCCCTTGGTGCTCCTTGCCTCTCTCTGGCTATATTTCCAAGGAATTCGCAGGGCCTGAGTCTTTTGTATGCACT	230	266
NM_001107634.1	Rattus norvegicus cyclin-dependent kinase 19 (Cdk19), mRNA	5776	CC	AT	CCACCCTCCTCAGAATGGCTGTTCCAGCTATGATGAGTTACGTCACATTTATTTTGTATTCTTGGTTGAAATAAAAT	77	113
NM_001030030.1	Rattus norvegicus cleavage and polyadenylation specific factor 3 (Cpsf3), mRNA	2248	GC	TA	GCATGGTGGTCCTGGAGTGGCTGGCGAACCCCTCTAACGACATGTATGCAGACACAGTGACCACCGTGATATTGGAAGTTCAGTCGAATCCAAAAATAAGGAAAGGTGCAGTGCAGAAGGTCTCTAAGAAGCTAGAGATGCACGTTTACAGCAAGAGGCTTGAGGTCATGCTCCAGGACATATTTGGAGAAGACTGTGTCAGTGTGAAAGATGACTCTGTCCTCAGTGTCACGGTGGATGGAAAAACAGCAAATA	255	291
NM_001106071.1	Rattus norvegicus coiled-coil domain containing 124 (Ccdc124), mRNA	1607				0	-
NM_001011982.1	Rattus norvegicus 5'-nucleotidase, cytosolic IB (Nt5c1b), mRNA	1869	GC	TC	GCACTTTTCAATATGGTGGATGACAGAAAAATCTACGAAGAAGAGGGTCTGGAAAAGTACATGGAGTATCAGCTCACTAACGAGAACGTCATTCTGACCCCAGGACCAGCATTTCGGTTTGTCAAGGCACTGCAGCATGTCAACTCTAGACTCCGTGATCTGTATCCTGACGAACAAGACCTATTCGATATAGTACTGATGACTAATAACCATGCCCAAGTGGGAGTACGGCTTATAAACAGCGTCAATCACTATGGTCTACTGATCGACCGCTTCTGTTTGACGGGTGGGAAAAGCCCCATTGGCTACTTGAAGGCATATCTTACCAACTTGTATCTCTCTGCGGATTCTGAAAAAGTACAAGAGGCAATAAAAGAAGGCATTGCCTCTGCAACCATG…	571	607
NM_001107682.2	Rattus norvegicus NMD3 ribosome export adaptor (Nmd3), mRNA	1848	AG	CC	AGCTGAGGACTCCCTTATATTTTGAAAGGAGCAATTTTACC	41	77
NM_001011958.1	Rattus norvegicus RALY heterogeneous nuclear ribonucleoprotein (Raly), mRNA	1509				0	-
NM_001079937.1	Rattus norvegicus PDZ binding kinase (Pbk), mRNA	1839	GC	TT	GCTAGGTGTCCAGACAGCTTTGAGCCAGCTCATTACTTTCACCTTTTTACCCGAGTGTGTGACTGTGGACCTAAAGTGATTGCTACAATGGAAGGAATCAGTAATTTCAAGACGCCAAACAAATTATCTGAAAAAAGGAAATCTGTATTATGTTCAACTCCATGTGTAAATATCCCTGCCTCTCCATTTATGCAGAAGCTCGGCTTTGGGACTGGGGTCAGTGTTTACCTAATGAAAAGATCTCCGAGAGGGTTGTCCCATTCTCCTTGGGCTGTGAAAAAGATAAATCCTTTATGCGATGATCATTATCGAACTGTGTATCAGAAGAGACTAACTGATGAAGCTAAGATT	351	387
NM_001106952.1	Rattus norvegicus EF-hand domain containing 2 (Efhc2), mRNA	2563	GC	GA	GCCAGATAACAGATCGAGCAGTTCTCAATGTGTATGGGGGCTTGTCAGAATGGCGAGCAGATGGCTACCTGTTGGATAAATACCAGCTAGGAAAAATAGAGCAAGACTTTTACACAGACCAGGACCTGTCTATAGGTGCCACGA	144	180
NM_001107518.1	Rattus norvegicus NIPA magnesium transporter 2 (Nipa2), mRNA	2860	GC	TT	GCTCTGGACATTTTCAACACTTCCATTGTGACTCCAATATATTATGTGTTCTTTACAACTTCAGTTTTGACGTGTTCAGCTATTCTTT	88	124
NM_001107369.1	Rattus norvegicus microtubule associated serine/threonine kinase-like (Mastl), mRNA	2989	AT	TG	ATTACCTGGCACCTGAGCTCCTACTGGGAGCCGCCCATGGTCCTGCAGTAGACTGGTGGGCACTTGGAGTCTGCTTGTTTGAATTTCTAACAGGAATCCCCCCTTTCAATGATGAAACACCACAGCAAGTATTCCAGAATATTCTAAAAAGAGATATCCCGTGGCCAGAAGGTGAAGAAAAGCTATCTGATAAGTCTCAAAGTGCGATGGATATGCTG	218	254
NM_001106343.1	Rattus norvegicus zinc finger protein 275 (Zfp275), mRNA	6205	CA	GG	CAAGCCCCCTCAGAAGAAACAGCAGCTGAAGAAGGTGGCCACATCGGGGCTGTGGCCTGAGTTTCCAGTTGTGCCCTGAGGGATATTACAGGACCAGAAACTGTACCCTTCTGGCCCCCTAGTGAGGAGTGTTGGACTTTCTTTGGGGCACAGCCTGAAAGGGCTTCCAGCCCCATCCTGGGAAGCAAGATCTAACTGACAATGACCTCTATGATCTTGG	220	256
NM_001107160.1	Rattus norvegicus anti-silencing function 1B histone chaperone (Asf1b), mRNA	1586	GT	TA	GTGACCCGATTCCATATCAACTGGGACAACAATCCTGACAGGCTGGAAACCATAGAAAACCAGGACCCCAATGTGGACTTTGGCCTTCCCCTCAGTTGCACTCCCGTCAAAAACCTGGGCCTCCCTAACTGCATCCCAGGCCTCCTCCCTGAGAACTCCATGGATTGCATCTGACAGGGGGCAGATAGGGCTCAGTAGGACCATGGCAGTCTCCTTGCACACCTGGAGGAGACCTACAAGCCCAGACAGTCATGCTTGGTCATTCTCAAGGACTTGGGGACCACCAGCTGTCTCCAGACCTGTCAGCCCCAATCTCTTCCATCCAGGTCCAGAAGAGTCATGTCACTTCTGACCCACTGGCCCCTAAAAGCAGGTACTTATGTTGCTCATTCTTGGTGT…	947	983
NM_001107406.1	Rattus norvegicus elaC ribonuclease Z 1 (Elac1), mRNA	2836	AC	AT	ACCCTCGTTCTCATTATCGTTCCTACAGCAGCAAAGAGTCTTTCGAAGCGTGAGACTAATGCACTTTTAGAGCTGTGTTAT	81	117
NM_001079698.1	Rattus norvegicus CXXC finger protein 1 (Cxxc1), mRNA	2335	CC	GG	CCACCACCCACTCAACAGCAGCCACAGCAATCCCAGAAGCTGGGGCGTATCCGTGAAGATGAGGGGACAGTGTTGTCATCAGTGG	85	121
NM_001134735.1	Rattus norvegicus TATA-box binding protein associated factor 10 (Taf10), mRNA	869				0	-
NM_001031653.1	Rattus norvegicus RNA polymerase III subunit D (Polr3d), mRNA	1921	AG	AC	AGAC	4	40
NM_001107680.1	Rattus norvegicus myeloid leukemia factor 1 (Mlf1), mRNA	1112	AT	CC	ATGTTGAGCAGCAGCTTTGAGGACGACCCCTTCTTCGCAGATTCTTTTCTTGCACACCGAGAAAGTATGCGTAACATGATGAGAAGTTTCTCTGAACCTCTTGGAAGAGACTTGCTCAGTATCTCTGATGGTAGAGGAAGAACCCATAATCGTAGAGAACGTGATGATGGTGAAGACTCC	180	216
NM_001107460.1	Rattus norvegicus zinc finger and BTB domain containing 2 (Zbtb2), mRNA	3068	CA	TG	CACTAGGAGAGAGCACCAGAGGGGTAGAAGCAGGAGAATTGGGAGTCTGAGGCCAGCCTGGGCTACACAGAGACCTTGTCCAAAAAACAAAACAAAAAATCCCGCAATGCCCATAGTTCACTGGTGACATCTACCAAAGCATCAAAAATAACAAATCAGGACACAAAATGAAAAATATAATTTCTTTTTGGAAGGAAAAACACAATTGATTTTATTGTTTATCCTCCAGTTTTTG	235	271
NM_001034188.1	Rattus norvegicus peptidylprolyl isomerase like 1 (Ppil1), mRNA	1325	GA	TT	GAGGGAGTGGGAGTCTAGTGAGTACAAGGCCAGGCCTTCAGGGCCTCCCCACGGGAAGTGACACTTTTTAGGGCTTTAGAGAAAATAGGTAAGAGGTTTTTATGTCTTTTTTTTTT	116	152
NM_001100886.1	Rattus norvegicus transmembrane protein 259 (Tmem259), mRNA	2100	AC	AT	ACTAGCAGGTGGCAGCTCAGGACGCGGCGCTCACGTTCCACGCTAT	46	82
NM_001105982.1	Rattus norvegicus sushi domain containing 4 (Susd4), mRNA	2121	GG	TT	GGACACGGACACAGGCCCTGGGGAGTCAGAAACCTGTGACAGTACCTCGGGCTCCTCCGAGATGCTCCAGAGTCTATATTCACCCCCGATGTGCCAAGGGGGCAGCCGCCCTGCCCCAGACACCCCTGACACGATTTCAAGCACAGCAGGGGAGGTAGCATCCACAAGCCCAGGCATCGACATTGCAGATGAGATCCCACTCATGGAAGAGGATCCCTAGTCTGGTAACATCCTGCTAACCCCACTGTCCCCTTTGGGGGAAAGAGCCTTGAACCTTGGAGAGAGGCCACAGGAGGACAGAGCTTGGGCACAAGGGGGTGCTT	323	359
NM_001106262.1	Rattus norvegicus otogelin (Otog), mRNA	10037				0	-
NM_001107132.1	Rattus norvegicus neuronal tyrosine-phosphorylated phosphoinositide-3-kinase adaptor 1 (Nyap1), mRNA	3854	CG	AC	CGGCAGCACACGGTCCTCTGGGACACTGCCATTTGAGGAATACAGGGGCGGCTGGGACGCCTGGATTGGGAGGGGAGGGGCCTGCCCAGGTCTAC	95	131
NM_001107554.1	Rattus norvegicus inositol polyphosphate-5-phosphatase F (Inpp5f), mRNA	4794	GT	GG	GTCCAGCCTGCTGGACCTTGAGGCAGGGCTTTGCGTAACTCCTTCTTCAGAGAGCAGCAGCAGAGCAGTCTCTCCCTTTGCAAAGATCCGCAGCTCCATGGTCCAGGTTGCTAATATTACCCAAGCTGGGCTAACTCATGGGATAAACTTGGCAGTTGCCAAAGTTCAGAAGAGTCCAGCAGAACCCGAAGTGG	194	230
NM_001008320.1	Rattus norvegicus ras homolog family member J (Rhoj), mRNA	1855	AA	TT	AAGTCATGACGGGCAAACCAAGTACTCTCTGTCCTGAACCAATGGCCTTAGTTCATGTCTTCACCAACCTTGGGAATACGACAACTTTTTTTTTTCTGAGTCTTTTACTCAAGCCCCTTGCCGTTCATTTATTTCTACTGCAGTTTCCTGTTGTCCAATCACTTGAGCCTTACAAATCCACATCAAAATAACCGAAAGACAAGCTGGATTGTGTTTATGCCAACTGACAGTGGCTCTCTGCCAATGTTCTTAGAGCTGCCATGTACCTCTGAATGCCTAATTACAAAAAAAAAATTACAACTTTTATAAACTGACAGACCCATAATGTTT	330	366
NM_001106180.1	Rattus norvegicus enkurin domain containing 1 (Enkd1), mRNA	1535	AA	GA	AAGTTGGTGCAAATAGAAGAGGCTATCAAGATCTTTTCCCGACCCAAAGTCTTTGTGAAGATGGATACCTAGCCCCTCCCCCCCTTTGTGGGTAGA	96	132
NM_031724.1	Rattus norvegicus secretory carrier membrane protein 3 (Scamp3), mRNA	1497	GT	TC	GTGGGATGCCCTGGCCCTGCCACCTGTGGGAGCCAAGATAGCCCCTATCCCTGCAGTCTCTGGGATTCAGGGAGCCGTCACCACTTGGTGACTTCTAATAGGGCTC	106	142
NM_001009629.1	Rattus norvegicus replication factor C subunit 3 (Rfc3), mRNA	1269	GT	TC	GTCGTAATCCAGGAGATGCTGAAGACAGTGGCCCAGTCACAACAGCTTGAAACCAGCTCACAAAGAGACTTCAAAGTGGTGTTACTGACAGAGGTGGACAAGCTCACGAAGGACGCCCAGCACGCCTTGCGCAGGACCATGGAGAAGTACATGTCTACCTGCAGGCTGATCCTGTGCTGCAATTCCACGTCCAAAGTGATACCCCCCATCCGAAGCAGGTGCCTGGCCATCCGTGTGCCTGCCCCCAGCATCGAAGATATTTGCAGTGTACTGTCCACCGTCTGCAAGAAGGAAGGTCTGGCCCTTCCTTCAAAGTTGGCTCGCAGGCTGGCCGAGAAGTCGTGCAGGAACCTCAGGAAGGCCTTACTTATGTGCGAAGCCTGCCGAGTGCAGCAATAC…	853	889
NM_001107155.1	Rattus norvegicus transmembrane protein 119 (Tmem119), mRNA	2167				0	-
NM_001106920.1	Rattus norvegicus angio-associated, migratory cell protein (Aamp), mRNA	2715	GG	CG	GGCCACACTGCTGAGATCCTGGACTTTGCACTCAGCAAAGATGCTTCCCTGGTGGTGACCACCTCAGGAGACCACAAAGCAAAAGTATTTTGTGTCCAGAGACCTGACCG	110	146
NM_001009496.1	Rattus norvegicus Ly49 inhibitory receptor 9 (Ly49i9), mRNA	1366	AG	AT	AGGAAACTCTAAGCCTCATCAATAACTGCAGCACCATGCAAAGTAATATCGAT	53	89
NM_139102.2	Rattus norvegicus dimethylglycine dehydrogenase (Dmgdh), mRNA; nuclear gene for mitochondrial product	3011	GC	GA	GCCTGGGGGTCAGAGATGAACTGTGACACAAACCCTTTGGAAGCTGGGCTGGACTATTTCATCAAGCTGAACAAGCCAGCCAACTTCACAGGGAAGCAAGCGCTGAAGCAGA	112	148
NM_001106006.1	Rattus norvegicus ubiquitin-conjugating enzyme E2K (Ube2k), mRNA	4971	GT	TT	GTTGTGAGCGTAGGCCTCACACAGCTT	27	63
NM_001047849.1	Rattus norvegicus glycerol-3-phosphate acyltransferase 4 (Gpat4), mRNA	3159	TC	CA	TCCTGAACCTCCATCTTGCGCTGGCCGAAGCTGCCACCTCTAAATCCTGAAGTGAGCCAGCTGCAGTTGTGGCTGCCCCAGCCTCTGCCATCATCCCCGCCACCCACTGCTGCATCCTAACAGACTCTGGCCCTCAGGCTGTCCTGGACTCCAGGACTGGAGTCTTGAGAGCTCCATGGGCTGCCTGCTGTCCTCTAACCAGAGTGCTGCTGGCTGGGGCTCCTTGGGACAAAATGCCTCTTGTTCCTCTATAGTGAGCCTCTAAGAGGAGTGCCA	276	312
NM_001008848.2	Rattus norvegicus RT1 class II, locus Ha (RT1-Ha), mRNA	839				0	-
NM_001005885.2	Rattus norvegicus DnaJ heat shock protein family (Hsp40) member B13 (Dnajb13), mRNA	2280	TG	CT	TGACCTGGAGGAGGTCCAGCTTCTGGGTCCACACCCACGCCT	42	78
NM_001013149.1	Rattus norvegicus talin rod domain containing 1 (Tlnrd1), mRNA	2046	GC	CT	GCGCTCAACCTGCACAGCCAGGCCTTGTGGACCGCTACCGTGTGACACGCTGCCGCCACGAGGTGGAGCAGGGCTGTGCTGTGCTGCGAGCCACCCCACTGGCAGACATGACCCCACAGCTGCTGCTGGAGGTGTCGCAGGGCCTGTCTCGAAACCTCAAGTTCCTGACGGATGCGTGCGCCCTGGCCAGTGACAAGTCACGGGACCGCTTCTCGCGCGAACAGTTCAAGCTGGGCGTCAAGTGCATGAGCACCAGTGCATCTGCGCTGTTAGCATGTGTGCGCGAAGTGAAGGCGGCGCCCAGCGAGCTGGCCCGCAGTCGTTGCGCGCTCTTCAGTGGGCCCTTGGTGCAGGCAGTGAGCGCTTTGGTGGGCTTTGCCACCGAGCCTCAATTCCTGG…	614	650
NM_001105902.1	Rattus norvegicus peroxisomal biogenesis factor 11 gamma (Pex11g), mRNA	1152	GA	TA	GAGGGCAATGCTAGAGCCTCCCATGGGCTGGCTTGCCTAAAGGGAGACATGTTGCCCCTCAGGTTGGGCTTTGGCAAAGCTGGAATATAGGAATGTCTA	99	135
NM_001107451.1	Rattus norvegicus solute carrier family 2 member 12 (Slc2a12), mRNA	4118	AG	CT	AGCCGCGGGAGCACGACAGGAGGCCTGGTTCTCAAACGCAGCCTCTAACCGAGATGTGGTAAGGAGGGAGATTGAAATCTTGAGGACGTCATAATATATTTCACATCAAGTAAGAATGTGAGTAAGGAGAGGGCAGAGCATCACTTCAAATTTATCACGAGTCTCTGGAATTATAGGTCACATTCT	186	222
NM_001129997.1	Rattus norvegicus EH domain binding protein 1-like 1 (Ehbp1l1), transcript variant 2, mRNA	5625				0	-
NM_001107491.1	Rattus norvegicus C-X-C motif chemokine ligand 17 (Cxcl17), mRNA	795				0	-
NM_001039010.2	Rattus norvegicus phosphopantothenoylcysteine synthetase (Ppcs), mRNA	1371	GT	AG	GTTCTCACCACTGATGTGAACTAAAG	26	62
NM_019175.1	Rattus norvegicus kallikrein related-peptidase 6 (Klk6), mRNA	1110	GA	GC	GAGTTTACACAGATGTCTGCACTCATATCAGATGGATCCAAAACATCATCAGAAACAAGTGACTCTGGCATGAGACATGCAGTTCTTGACCTGTCTCTCCCCTGACCCTAGCTGGCTACATATTCTCTCTCCCTGAAACCCTGCCCCACTCTCAGAGCCTTCAGATGTCCAGCTCTGCCCCCTCATGC	188	224
NM_139328.2	Rattus norvegicus solute carrier family 7, member 6 opposite strand (Slc7a6os), mRNA	1513				0	-
NM_001106588.1	Rattus norvegicus coiled-coil-helix-coiled-coil-helix domain containing 3 (Chchd3), mRNA	1504	AT	CC	ATGAAGGAGTCCTCTCCATCTGGCTCTAAGTCTCAGCGATATTCCAGTGTTTATGGTGCTTCAGTTTCTGATGAAGAATTGAAAAGAAGAGTAGCCGAGGAGCTGGCATTGGAACAAGCCAAAATGGAGTCGGAAAACCAGAGACGCC	148	184
NM_001106309.1	Rattus norvegicus zinc finger protein 511 (Zfp511), mRNA	1134	TT	GT	TTTGATAAGCCCAAGACAAACAGAGGCCCAGCCATGCCAGCTGCTGCAGACACAGCAGCCAGAGCCCTGAGAGATGACAGCGATGCCATGGAGGTCTGCTTGGAACCTGCTGCCCCACCTCCCTGCAGAAGGACCTACAGTCACAGAATACCTTCTACTGTCTGTTTTGGCCAGGGTGCAGCCAGAGGGT	190	226
NM_001106768.1	Rattus norvegicus mediator complex subunit 16 (Med16), mRNA	2942	CA	CT	CAGCAGCCTGGGTCTGCCCCTTCTCGGGGCGTGTGCGTCTCCAGTCCCATGGTTTTATCCAGCCCAGCTTGAAGGAGCTGGGCTGCTCTGTGTTCATCCT	100	136
NM_001107156.1	Rattus norvegicus spliceosome associated factor 3, U4/U6 recycling protein (Sart3), mRNA	3605	CC	TA	CCCTGCACAGCACGCGTGCCCATCACTCTTTAGTGTGAAAGGTGGAGTGGAGGAGCCGCACTCATCAGAGTGGCCTGTTCAGTGAAGTGCCCGAGGGACATCACAGAAGGCTCGCTTGATGGGTTTTGTCCAAAGAGCCTATGAGTTTTTCTATTATGTATTTGTAATTGACATTTTGACTGTTTTATGTTCCCTAAACGTGGGGAGTCTGCAACACTTGTTCCTAGGAATTGTGTGTGCCACCCGCTGTGTGTGCCACCCACTGTGGCCCATTTTCTTTGCCTGATGACTGAAGACCTACGCCCTCTGCTCAAACACTCATGCCTGGTGCCGTGTCCAGTGCAGAGTGAGTTCCCATTTAGTTCTGTTTA	371	407
NM_001011944.2	Rattus norvegicus solute carrier family 37 member 1 (Slc37a1), mRNA	2929	GG	TT	GGCTGTTTCTAGACCCACAGGGATTTATTTATT	33	69
NM_001106934.1	Rattus norvegicus POF1B, actin binding protein (Pof1b), mRNA	3877	TA	CT	TAACTCATCT	10	46
NM_001107409.1	Rattus norvegicus casein kinase 2 alpha 2 (Csnk2a2), mRNA	1518	TG	TC	TGGTGAAGGAGCAGTCCCAGCCTTGTGCTGAGAACACCGTGCTTTCCAGTGGTCTCACCGCAGCACGATGAAGCCTGGGGAATCGACGGTCTGTTGCGGTTCCTCCCACTTTTCCATAAGCAGAACAAGAACCAAATCAAAACGTC	146	182
NM_001106230.1	Rattus norvegicus glutaminyl-peptide cyclotransferase-like (Qpctl), mRNA	2166	TG	CA	TGCTCCACCTCATTGCGATGCCCTTCCCTGCCGTGTGGCACACACCTGCTGACACTGAGGCTAACCTCCACCCGCCCACGGTGCACAACCTGAGCCGCATCCTCGCCGTGTTCCTGGCTGAGTACCTGGGTCTCTAGCCTGCAGACTGATACCCTGAAGGGATCTTACAGCTAGCTGTGAACTGGTCACGTGCACTTGGAGCCAGTGCGGGGCGGCCAGGCTCACCTCAGATGTATGCTATAACCATGTCAAAGCCACGGTGTTTCAAGGATATGCAAGGAACACTGAGGGCATAAGAGAGCCAAAGGAAATCAGGAATGAATCCTTTGGCCTGTCCTGAAGTAAATAACTGGAAGTTTCCAGGGACCAATGATGTGTCATGGGCTGGCACTTGGACCA…	618	654
NM_153622.2	Rattus norvegicus solute carrier family 17 member 3 (Slc17a3), mRNA	2292	AA	GT	AAAGTCCCGAGTTTATGTTCCATGCGCTATTCAATAGCCTTCATCGCACATATCTGCAACTTCACATTGATAGCACAGAATTCCATCATAAGCATCACCATGGTAGCCATGGTCAACAACACGGACCAGCCATCCCACCTCAATAGCTCTACTGAATGGTTTCCTGATGGT	171	207
NM_001105971.1	Rattus norvegicus SLAM family member 9 (Slamf9), mRNA	1125				0	-
NM_001106671.1	Rattus norvegicus tetratricopeptide repeat domain 22 (Ttc22), mRNA	2553	CT	AC	CTAAAACAGGCCAAGGTGGCACTGCGCCTGGGTGCAGGCAGGGTCCTGAC	50	86
NM_001109256.1	Rattus norvegicus RAB15 effector protein (Rep15), mRNA	1074	GA	TA	GACGCAAGGCCGTGGAGCAGTTCGTGCTGGAAACAGAGGATTGTGTCTCCATCAAAGAGCTGCTGGGGAACTGTCTGGATAAAAGAGACGGGCTGAGTGACATGGGCAAGGTTTACGTCCGCATCCTTTAGACTGGGCATGCTGCTGGGACTGGCCTGAAAGATAGAATAGGGCACTCCCCAGCACAGGGATA	193	229
NM_001126266.1	Rattus norvegicus UTP23, small subunit processome component (Utp23), mRNA	992	GG	GC	GGAGTAGACTTGGAGTGCGGAAGTGAAGGTCGCGCCTGTTGTCCTGTTGC	50	86
NM_001106494.1	Rattus norvegicus lysophosphatidylcholine acyltransferase 4 (Lpcat4), mRNA	2488	TC	TT	TCTGGATGCAGCCAGGGCCTCTCCCTCTGTCAATTCCAGAACTTCTCTCTCCATGACCCTCTGTACAGCAAGCTTTTCAGCGCCTACCTACGCCCCCCACACAAGCCTCGAAGCACCTCCCAGATACCAAATGCCTCATCCAGCCCCACTGCCCTGGCCAACGGGACCGTGCAGGCCCCCAAGCAGAAGGGTGACTGAGCGCCTCAGCCTCCCACTCTTTCCTCAGCTCAAACCCAGCCCTGCTCTCAGGACAGCACCAGAGGCCTACCCTATGCCTCAACCCCACCTCTGCTCCTGTTTGATTCTTTTGGTCATTTTTTTTTT	324	360
NM_001106372.2	Rattus norvegicus membrane associated ring-CH-type finger 5 (Marchf5), mRNA	1472	AC	AC	ACCAAGCCCTTCAACAGATGCTGGACAGAAGTTGCTGGGTGTGTTTTGCCACCGATGAAGACGATAGAACAGCTGAATGGGTGAGACCATGCAGGTGCAGAGGATCTACTAAGTGGGTTCACCAGGCTTGTCTACAACGCTGGGTAGATGAGAAGCAACGAGGAAACAGCACAGCCAGAGTGGCCTGCCCTCAGTGCAATGCCGAGTAC	209	245
NM_001130495.1	Rattus norvegicus intraflagellar transport 27 (Ift27), mRNA	1021	TA	CT	TATCTCCCTCCCAGGTGTTTTAGTGGGAACGAAGACAGACCTGGCTGGCCGACAAACAGTGGATTCTGCCCAGGCCCAGGCGTGGGCCCTGAGTCAAGGCCTGGAATTCTTTGAGACATCTGTGAAGGAGATGGACAACTACGAGGCCCCATTCCACTGTCTGGCCAAGCAGTTCTACCAGCTGTATCGGGAGAAGGTGGACATATTCCATACCCTGGTGTGAGGGTCCAATGGACTGTCCCACAGGACTGGCCACGCTGGGCTGGGCTAATGCTGTTAGCCCAGCAGACCTTCATCTTTCCAGGACACAGAAGATGGGATCACCTGGTACTTCTCAAAAATCACCACAGCT	352	388
NM_001106247.1	Rattus norvegicus programmed cell death 5 (Pdcd5), mRNA	657	GC	GG	GCCAGG	6	42
NM_001106243.1	Rattus norvegicus mitogen activated protein kinase kinase kinase kinase 1 (Map4k1), mRNA	2699				0	-
NM_001106639.1	Rattus norvegicus OTU deubiquitinase 6B (Otud6b), mRNA	1323	CC	TG	CCACTTGGTCGTCATGGAGGAGATCTTGGCTGAAGAGCTTGATGATGAGGAGCAGCTGATGAGAAGGCATCGGAAGGAGAAGAAGGAGCTGCAAGCTAAAATTCAGGGAATGAAGAACGCCGTTCCCAAAAACGACAAAAAGAGGAGGAAGCAACTCACGGAAGATGTTGCTAAATTGGAGAGGGAAATGGAGCAAAAACACAGGGAAGAACTGGAGCAATTGAAACTGACTTTCAAGGACAGTAAGATAGATTCTGTTGCTG	263	299
NM_133563.1	Rattus norvegicus gonadotropin inducible ovarian transcription factor 1 (Giot1), mRNA	2557	TC	TC	TCCGTCATAGTGCAGGCTCCACTGGGTGCTTGAGTGAGGCCCCCCGCGTCTCTATTTCACGCTGTGACTTGCTGCGGGGAGCTGTGAGCCGAGCGGGGAGAGCTCGGAATCCGCACCATGGATGCAGTCACCTATGAGGATGTGTATGTGAGTTTTACTCAGGAAGAGTGGGCTTTGCTGAATCCTTCCCAGAAGAATCTCTACAAAGATGTGATGATGCAAACCTGCAGGAACCTCATTGCTATAGGCTACAAATGGAACAGTCAGAATATTGAAGAACATTGTCAGAGTTCTGGAAAACACGAAAGGGATATCATCTGCCACTCAGGATACAAGCCATTTGAGCATAAGGACTATGGAAAGATGCAGTTTACCTCTCTTTCTCCAACAACAGTTAGA…	940	976
NM_001106297.2	Rattus norvegicus Cd2 (cytoplasmic tail) binding protein 2 (Cd2bp2), mRNA	3004	GA	GC	GAAGGCAGAAGGCAGGTCCTTCCCAGCCAAGTGTAGCCCCACACTGATAACCCAGTGAAACCCACTTTGGACTTGTACCCTCTCGAATTGTATGATAATAAATTTGTGTCGAGCTGC	117	153
NM_001106529.1	Rattus norvegicus kinesin family member 3B (Kif3b), mRNA	5604	AT	CT	ATAGCCTCTGGTGCTTCTCTTTTCTCAATACGGATCCGATACTGAAGAGAGCAGATGGTAAAAATGTCTTGCTGCCCCCAGAATGCTGCTGCTTTGAGTTCTGAGTTGAGCCAAGACTATAGAGGATGCATGAAGCTCACTGAGGGACCAGAGCTTTATGCTGTCATCTGTCTGGGATGCTGGAAGGCCACAGCCTACAGTAGCCATTGTAGTTTAGAAGCAAGTCT	227	263
NM_001107476.1	Rattus norvegicus transmembrane protein 150B (Tmem150b), mRNA	1667	AT	AA	ATCTGCTAAGCCACCCCCATCCCTCCCCCACCCCACCCGCAGAGTTTGATCAATAAATAAAATAATAAATAAA	73	109
NM_001106119.1	Rattus norvegicus F-box DNA helicase 1 (Fbh1), mRNA	3530	GT	GA	GTGACAGAAGGAGAATCGCCTGCACGGATACATTTGATCGGCGGGA	46	82
NM_001107572.1	Rattus norvegicus ovo like transcriptional repressor 1 (Ovol1), mRNA	2993	AA	GT	AACATGGCGGGCTGGGAAGCCCTTGAATGCCCAACAGTCCGACCTCCCTGCCTTATGTGTGTAGCACACAGATGACACAGGATCTGACCCCAGCACGGGCTCTCAAGAGAACGAAGTCAAGTCTTCCTAGGCTATCTCTGAACTCCGTGTGGACTGATCTGAAGACTTGT	170	206
NM_001012133.1	Rattus norvegicus SP140 nuclear body protein (Sp140), mRNA	3003				0	-
NM_001039005.1	Rattus norvegicus mucolipin TRP cation channel 2 (Mcoln2), mRNA	2547	TT	CA	TTTGATCTACCTGGGCTACACGTTCTGCGGTTGGATTGTCTTAGGGCCGTACCACGAGAAGTTTGAAAACCTGAACATCGTTGCCGAATGCCTGTTTTCTCTGGTCAACGGTGATGACATGTTTGCCACATTTGCTCAGATCCAGCAGAAGAGCCTCCTGGTGTGGCTGTTCAGCCGTCTCTACTTGTACTCCTTCATCAGCCTCTTCATCTACATGGTCCTCAGTCTTTTCATCGCGCTCATCACCGATTCGTACCACACCA	263	299
NM_001106417.1	Rattus norvegicus calcyphosine-like (Capsl), mRNA	948	AG	TG	AGATTCGACAGAGATGGAAATGGAACAATAGACTTCAATGAGTTTCTTGTCATG	54	90
NM_001037770.1	Rattus norvegicus F-box protein 22 (Fbxo22), mRNA	1832	AA	AA	AAGGTGGAGGTTCAAGTAGTGGTTGGTGACTTTTAGCAGAATCATGAGAAAA	52	88
NM_001107537.1	Rattus norvegicus chordin-like 2 (Chrdl2), mRNA	1529	CA	TA	CACCCATGAAGGTTACTGGACCGTCTTCCTAGCCCAGACTCCAGAGTTGAAAGTTACAGCCAGCCCAGACAAAGTGACCAGGACATTATAGCAAGGACCTAAACAGTTGCAGATATGAGTTCTATTGGTTTTATTATTATATA	143	179
NM_001106256.2	Rattus norvegicus Josephin domain containing 2 (Josd2), mRNA	868	CG	TG	CGACACTGGGTGGCCCTGCGCCAGGTGGACGGCATCTACTATAATCTGGACTCAAAGCTACGGGCACCTGAAGCCCTGGGGGGCGAGGATGGTGTCAGAGCCTTCCTGGCAGCTGCCTTGGCTCAAGGCCTGTGCGAGGTGCTATTGGTGGTGACCAAGGAGGTGGAGGAGGCTGGCTGCTGGCTGCACACAAGCTGATGTACTGCCTGGGAAGGGTTGCCTGCTGCCGTTCCTGTGTCCAGTGCCTGAAAAGAACCTGTAACTTCAGGCCTCAGGAGGCCTGTCCTGCCCCAGTGTCCCCGCTCCCCTGACCACTGCTGCCTCAATAAATCTGCTCTTTTG	342	378
NM_001009638.1	Rattus norvegicus regulator of MON1-CCZ1 (Rmc1), mRNA	2145	GG	TT	GGTATTGGCGGCCATGACAACATTTCCGCACGAAAATTCTTAGATGCTGCTAAGCAGACTGATGATGTCATGCTCTTCTATACCATATTCCGCTTCTTTGAACAGCGAAACCAGCGTTTGCGAGGGAACCCTAACTTCACACCAGGAGAACACTGTGAGGAACACGTAGCCTTTTTCAAGCAGGCTTTTGGAGAACAAGCTCTAATGAGGCCTACAACATTCTGAAGTCCCTCAACGGTT	240	276
NM_001013946.1	Rattus norvegicus A-kinase anchoring protein 8 like (Akap8l), mRNA	2194				0	-
NM_001008847.2	Rattus norvegicus RT1 class II, locus Da (RT1-Da), mRNA	1212				0	-
NM_001106465.1	Rattus norvegicus netrin G1 (Ntng1), mRNA	5085	TC	GT	TCACAGCTTTGTCACAATGATCAGGAATCAGACACTGCACAATTCAATATGTGGGATTCCAAAAGCTAATTCTGAAGT	78	114
NM_001105976.1	Rattus norvegicus cytochrome c oxidase assembly factor COX20 (Cox20), mRNA	1028	AG	CT	AGAAAAAGCCCTTCAAGCTCCTAGGTATTTTAGATGTTGAGAACACTCCATGCGCTCGAGAATCTATACTGTATGGCTCACTAGGATCTATTGTGACTGGACTTGGACATTTCTTGGTGACCAGCAGAATTAGAAGATCCTGTGATGTTGGAGTAGGAGGATTTATCCTGGTGACTTTAGGATGCTGGTTCCACTGTAGGTATAATTTTGCTAAGCAGAGGATCCAGGAAAGAATTGCCAGAGAAGGAATAAAAAACAAGATTTTATATGAAAGCACCCACCTTGATCCTGAAAGAAAAACGAAGAGCAGTAACAGCAGCTGAGCGACTTCATCAGCT	338	374
NM_001014017.2	Rattus norvegicus zinc finger protein 819 (Zfp819), mRNA	2366	AT	TT	ATCCACACTGGTGAGAAGCCCTACAAATGCCGTGACTGTGGGAAGTCGTTCAGAAGAAAGTCCCACCTTCAAGTGCATGGCCGAACACACACGGGTGAGAAGCCTTATGCATGCCCTGACTGTGGGAAGGCCTTCAGCCACAGTTCAGTTCTCAGCACACATCAGAGAATCCACACTGGGGAGAGGCCTTACGTATGCAGCGACTGTGGGAAGGCCATGTCTTCTAAAGCTCAATTGAGTGAGCATCAAAGAGTCCACACAGGCGAGAAACCCTTCGTGTGCGTTGAATGTGGGAAGGCTTTCGGCGGCAGATCTTCCTTACAAGTACACCGCAGAACTCACAGCGGTGAAAAGCCGTTCGTCTGTCACAAATGCGGGAAGGGCTTCCTGCGCAAGTCA…	697	733
NM_001013157.1	Rattus norvegicus nicotinamide nucleotide transhydrogenase (Nnt), mRNA; nuclear gene for mitochondrial product	4149	GA	GC	GAAGCTAACAGCATTGTTATTACTCCAGGATATGGGCTCTGTGCAGCTAAAGCTCAGTACCCCATTGCCGATTTGGTGAAGATGCTTACCGAACAAGGCAAGAAAGTCAGGTTTGGAATCCACCCAGTTGCGGGCCGAATGCCTGGTCAGC	151	187
NM_001162935.1	Rattus norvegicus cortexin 2 (Ctxn2), mRNA	457				0	-
NM_001107890.1	Rattus norvegicus tetraspanin 9 (Tspan9), mRNA	4202	TG	AC	TGACCTCAAGGAAATGCCTGACGTAGACCCTGGCATTTCTCCATGGCTGACTGACTGGCAGTGGGGCTCAGAGGGTAGGGTCTGGAAACTGCTCTCAGATGACTGACACATGTCAGGATGCAAGTCTCCTTGTACCTCTAGACTCTGAGCTGGAACAGCGTCGTCCTGTCTCTCCGCCAGCCTGGACCAGCGCCTCAGCTGTCCCCCTTGCACATGCTCTGACCTGAC	228	264
NM_001107230.1	Rattus norvegicus eukaryotic translation initiation factor 4E nuclear import factor 1 (Eif4enif1), mRNA	3625	TC	TG	TCAGGCCTGCCCCATATGCACTCCCAGCTGGAGCATCGCACCAGCCAAAGGAGCAGCTCCCCCGTGGGTCTTGCCAAGTGGTTTGGCTCAGATGTGCTACAGCAGCCTCTGCCCTCCATGCCCACCAAAGTCATCAGTGTAGATGAACTGGAATATAGACAGTGAACAGGGCAGGCTGGCCCACCCATACTTGGACCTGCGGTGGCATCCTGGCCATGACTTTCATTCCCCATCTTTGTAATGGGCTTTTTACATTGGAGCACGCTGTGTGAGAATG	277	313
NM_001107124.1	Rattus norvegicus tweety family member 3 (Ttyh3), mRNA	4473	GC	TT	GCCCAGAAGGTGGATGGTTAGCTCCTGGGCCACAGGTGACCAGGGTCTCTTTCTTTGTTT	60	96
NM_001106165.1	Rattus norvegicus carbonic anhydrase 7 (Car7), mRNA	1534				0	-
NM_001013962.1	Rattus norvegicus MAGE family member A13 (Magea13), mRNA	1693	GC	GT	GCTCTCCTTGCATCCACAGCCATATCTACTGCTGCGGATAATTTGGGTTCTGGGGAGAAGCCCAGCAGTGTCTCCCACCCTGAGTAAATTAGGCTGGTTTTTCATACCATGT	112	148
NM_001030037.1	Rattus norvegicus calpain 7 (Capn7), mRNA	3554	GT	GA	GTATATTCAGCTTGCAGCTTTACTTTCTCGAAGATCCCTTCACCATACACCTTATCAAAGCGGA	64	100
NM_001025629.1	Rattus norvegicus motile sperm domain containing 3 (Mospd3), mRNA	1037	AC	TT	ACCTGAGCTCTTAGCTGAACCCACCCTCCCCTTCGCAGGCAGGGACCTAAGGCAGCCACTGTGATGTTTGCACCTTGCTCCTTTCCCTCCCTTCCGCCTTTCCACTGATTGTCATCCTCCCCACAACAAACACCCAGGGATTTATACTCATTTTCCAAGTTGAATAAAATACATT	175	211
NM_198754.2	Rattus norvegicus CKLF-like MARVEL transmembrane domain containing 8 (Cmtm8), mRNA	1175	CG	CT	CGCGACCATGGAAGAGCAGCAGCGCGCGCGCTCGCACACGGTCACTACCACTTCCAGCTCCTTCGCGGAGAACTTCTCTACCACCAGCAGCAGCTTCGCTTACGACCGAGAGTTCCTCCGCACCCCGCCAGGGCTCCTGATCATAGCTGAGATCGTCCTGGGACTGTTGGTGTGGACGCTGATCGCTGGCACCGAGTATTTCCGAGTCCCTGCTTTTGGCTGGGTAATGTTTGTAGCTGTCTTTTACTGGGTCCTCACCGTCTTCTTCCTCATTGTCTACATCACCATGACTTACACCAGGATTCCCCAGGTGCCCTGGACCACAGTGGGCCTGTGCT	338	374
NM_001106714.1	Rattus norvegicus solute carrier family 7 (cationic amino acid transporter, y+ system), member 15 (Slc7a15), mRNA	2425	TG	CA	TGTACTTCCTGCTTTTCCACTTCCAGTGTCAGTCCAAGTGTGTACAGACGGCCACTATGCATCTCCAGCTGCTCCTGGAAGTGGCTCCAACCA	93	129
NM_033098.2	Rattus norvegicus TAP binding protein (Tapbp), mRNA	1563	AG	TC	AGCCTCAGCGGGAGCCTGTCTTCATCACCATGGCAACAGTGGTACTGACTGTCCTCACACGTCACCCCGCCCCTCGGATCCATCTGGGAAAGGATGCAGTGCTGGACCTGCGTTTTGCCTACGCGCCCCCTGCTCTGGAAGATGCTCCCTCTGTGGCCTCAGGGCCTCCTCCCTTTGGGCTGGAGTGGCGGCGCCAGCACAGGGGAAAGGGTCACCTGCTGCTGGCTGCAATTCCTGGGCTGCTTGAGAAAATGCCACCAGCCCGAGAAAAGGCTGTGGCATTTGCTGCTTGGGATGACGACAATGATCCCTGGGGCCCGTGGACTGGGAATGGGACCTTGTGGCTGCCAGCAGTGAGCCCTTCTCAGGAGGGTGTCTACCTGGCCACCGTACATCTGC…	899	935
NM_001106150.1	Rattus norvegicus sprouty RTK signaling antagonist 4 (Spry4), mRNA	4756	GG	TT	GGCTTCCCTGGCCTCCCAGTTATGCATTTGGTGAGTAGCTCCGTGCCCTCCCTGATCTGTAATGGTGGATGTCAGTCCTGTGTTTCCATTTTGATTGTGGGTGGCTGTGCTGTTTCTTAGCTTGCTTTTCTCTTGTGTCCTGTGGTTGATTTCCTGTTAGCAGCACTAGAGCTGTGCCCCAGCACCCACTCCACCACATTCCTGTGTCACTGTAGCCCCCCTGTTCACCCCCCACCACAAAAGTTACCACGAAAGGTTTCCTTTGTAAAAAATATTTATTTTGAAGCTCTATT	293	329
NM_001107195.1	Rattus norvegicus olfactomedin-like 2B (Olfml2b), mRNA	3122	CG	TT	CGGAATTTCTATGGCAACTGCTTTGTCATCTGCGGGGTACTGTATGCTGTGGACAGCTATAACCAGAGGAATGCCAACATCTCGTATGCCTTTGACACGCACACCAACACACAGATTGTCCCTAGGCTGCTGTTTGAGAATGAGTATTCCTACACCACCCAGATAGACTACAACCCCAAGGACCGCCTCCTCTATGCCTGGGACAATGGCCACCAGGTCACCTACCATGTCATCTTTGCCTACTGACACACTTGACCCCACAAAAAGAAGTGCAGAGGGGCCACTAGCACCTTGTTTGTGTCTGTGTGCATGTCCGTGTGTGAGATTGTGCAGGCGGGTGTGTGTTGTT	349	385
NM_001106574.1	Rattus norvegicus chondroitin polymerizing factor 2 (Chpf2), mRNA	3763	CT	TT	CTCAGTGAGGAACTGTACCACCGTTGTCGCCTCAGCAACTTGGAGGGGCTGGGTGCCCGTACCCAGCTAGCTATGGCTCTGTTTGAGCAGGAGCAGGCCAACAGCACTTAGCTTCTCCACCCCTGGGTCTGCCATAGCCCCAGGAAGGGCAAGGCAAGGCAATGGACAGATGGAGGGCTTGCCGCTGTATTTTT	194	230
NM_001013236.1	Rattus norvegicus ribonucleotide reductase catalytic subunit M1 (Rrm1), mRNA	3038	AC	TT	ACATTTCTGCCAGGAGAAGAATCCTTGATTTGCAGTACTGTTTCTCTATAGTGTAAAGGTCATT	64	100
NM_001106963.1	Rattus norvegicus eukaryotic translation initiation factor 1A, X-linked (Eif1ax), mRNA	3059	AA	TC	AACATGCTAAAATCAATGAAACTGATACATTTGGTCCTGGAGATGATGATGAAATTCAGTTTGATGACATTGGGGATGATGATGAAGACATCGATGATATCTAAAATGAACTCAACATTGCACATTCCAGTCTTCCTGAAGATTGTCCTTCAAGTTTGGAATCTGGCCATAGACCTCAAAGAAAAGTTTTCACTGTCACCTCAATTGTAATTTGTTGAGGCAGATTTGATACTACAGTCTTTCAAAACTGATAATC	256	292
NM_001106369.1	Rattus norvegicus cyclin J (Ccnj), mRNA	3820	AT	GT	ATGGGGAGGCTGGAGAATCATGACTGTTTCTAAAAACAGCAGGATTCAATATAAATGCAACTCAACGACAGTTAGCTGGGGGGTGGGAGTGTGTGGGTTTCATTTTGT	108	144
NM_001106741.2	Rattus norvegicus churchill domain containing 1 (Churc1), mRNA	535	GT	CT	GTGTCGCTGGGGACGTTCTCCATAAACTGCGTGACGATGTGTGGGGACTGTGTGGAGAAGAAGTACCCCAATCGGGGGAACACCTGTCTGGAGAATGGCTCGTTCTTACTGAACTTTGCAGGCTGCGCCGTGTGCAGTAAGCGGGACTTTATGCTGATCACAAACAGATCCCTGAAAGAGGAAGATGGAGAAGAAATAGTTACCTATGACCATTTGTGTAAGAATTGTCATCATGTCATAGCCAGACATGAGTATACATTCAGCATCATGGATGAATTTCAGGAATATACCATGCTGTGTCTGTTGTGTGGCAAAGCCGAAGATACTATCAGTATTCTCCCTGATGACCCCCGACAAATGGCTCTGTTATTCTAAGCCTCCTGCAATTCTGTTGTAACT…	412	448
NM_172055.2	Rattus norvegicus Cbp/p300-interacting transactivator with Glu/Asp-rich carboxy-terminal domain 1 (Cited1), mRNA	873	AT	AG	ATCAGTCTCTCCTGCTGGTGCCCAGAGCCCTGCTATCATTGATTCTGACCCAGTGGATGAGGAGGTGCTGATGTCTCTGGTGGTAGAATTGGGGCTAGACCGAGCCAATGAGCTTCCCGAGCTGTGGCTAGGGCAGAATGAGTTTGATTTCACTGCAGATTTTCCCTCTGGCTGCTGATGCCAAGTGCCCCTAAAAAAATGAGGAAAAAAAGCCACCAGTTCTGTTGTAAATAAAAG	237	273
NM_001107127.2	Rattus norvegicus zinc finger protein 846 (Znf846), mRNA	2940	TG	AT	TGAGAAGCCATAGGAAATGTAAGAATGCCGTGTTGAAGTTACATCATCAAACATTAGTGAGTTCGTACAAGTGACAAAGCCAATGACTATGAAGGGTGCAGTAGAGCTGTAACACAACAAGGGGTGATGTAACCAGGCAAAAATCCCATCAACATAAACAATGCAGGAAAATTTTCTATCATCAAGCAACTCACCAACTGCCTGAAAACTTACAACTGCCAT	222	258
NM_001107164.1	Rattus norvegicus KLF transcription factor 1 (Klf1), mRNA	1514				0	-
NM_001106565.1	Rattus norvegicus mediator complex subunit 27 (Med27), mRNA	1252				0	-
NM_001115022.1	Rattus norvegicus copper metabolism domain containing 1 (Commd1), mRNA	904	AA	TT	AAGTGCCACTGGAGGAATTCCGCCCCTTCCTGGCGAAGATGAGGGGAATTCTCAAGTCTATTGCATCTGCAGACATGGATTTCAACCAGTTAGAGGCATTCCTGACCGCTCAAACCAAGAAGCAAGGCGGCATCACCAGTGAACAAGCTGCAGTCATCTCCAAGTTTTGGAAGAGCCATAAGACAAAAATCCGAGAGAGCCTCATGAGCCAGAGCCGCTGGGACAACGGGCTTCGGGGCCTGCGCTGGAGAGTGGACGGCAAGTCCCAGTCACGGCACTCAACTCAAATACACAGCCCTGTTGCCATAATAGAGCTGGAATTTGGGAGAAGTGGACGGGAATCTGAGTTTCTGTGTCTGGAGTTTGATGAAGCTAAGGTCAAGCAGATCTTGAAGAAGC…	504	540
NM_001109371.1	Rattus norvegicus acyl-CoA wax alcohol acyltransferase 1 (Awat1), mRNA	1331	AT	GG	ATCTTCGGGTTCTATTTTTGTGTCTTCTATGGACAAGGCTTCCATCAAGAATGTAAGGGACTCCTACCATACCACAGACCCATCGTCACTGTAGTTGGGGAACCTTTGCCACTACCCCAGG	121	157
NM_001105861.1	Rattus norvegicus DNA topoisomerase III beta (Top3b), mRNA	2966	AG	CA	AGACCTCCAGGAAAGCCCAACCCCAGGCGGCCAAAAGACAAGATGTCAGCCCTGGCTGCTTACTTTGTATAACTACCCACCTTGCCCCACTCTAGCCCCCGTTGATGTAGACATGTCGTGGTGATCTTTGAGCCACTGAAACCA	144	180
NM_001106398.1	Rattus norvegicus mitochondrial calcium uniporter (Mcu), mRNA; nuclear gene for mitochondrial product	1364	CA	TT	CAGTCAGCGCCCCTGTTTGTAACTCACGCCTTT	33	69
NM_001106154.1	Rattus norvegicus transmembrane and coiled-coil domains 6 (Tmco6), mRNA	1842	CT	TG	CTTTTGCTGCCTGCATCCAGTCCCCCCATGTGGCTGTGCTGGAGGCCCTTGGATATGCCTTGTCCCAGCTTCTGCAGGCTAAGGAAGCTCCAGAGAAGATCATTCCCTCTATTCTGGACTCCAGCCTTCCCCAGCAGATGCTGCGATTGATGGGACCAGGCCCGAAGCTGAATCTTGGGGTTGCTATGGAGTTTGCCTGGTGCCTTCACTATATCATTTGCAGCCAGGTCAACAATGCTGTGCTCCTCACCCACGGGGCTCTGCCCACGTTGGTACTGCTGCTGGTGGACTTGGCTGGGGCTGTGCAGAGAACGGATGATGTGGGACTAGAGCTGCTTGCATGCCCTGTGGTTCGGTGTCTAAGCAACCTG	371	407
NM_001106004.2	Rattus norvegicus COMM domain containing 8 (Commd8), mRNA	1412	GC	GT	GCTCCTTCACAAAATCATCGACGGCATCTGCGGCCGAGCTTATCCTGCCCACCAAGATTATCACAGTGTCTGGAATTCAACTGAGTGGAAGCATGTCCTAGAAGATGTTACCACATTTTTCAAAGCCGTAGTTGGCAAAAACTTTTCTGAGGAAGAGACACTCCAGCAATTGAACCAACTGAATTCATGTCATCAAGAAGCTGTTATGAAATGT	214	250
NM_001103351.2	Rattus norvegicus poly (ADP-ribose) polymerase family, member 9 (Parp9), mRNA	3179	CA	TT	CATATATTTCACCAAGAGCCTCAAAAAACTAGCAGACAAGGCCAGGAAAACCTCTAGCACAGACAGGCTAATCTATGTGTTTGAGGCAGAAGTACTCACAGGGTCCTTCTGTCAGGGTAATTTCTCAAATATCATCCCTCCGCCATTGAGTCCTGGGGCTTTAGATGTTCATGACAGCGTGGTTGACAGTGTTTCCAACCCTGAAACCTTTGTTATTTTTAGTGGCGTACAGGCGATGCCCAGGTACTTGTGGACTTGTACACAGGATAGGACATTCTCACAGCATCCAATGTGGTCCCAGGGCTACTCGTCAGAACCAGGAATGGCCTCTTCGCTGCAGTCCTGGGGAAGGGTCTCAAATGGCAGCCCTGTTTAGTCTCCACGTCATT	389	425
NM_001106317.2	Rattus norvegicus Ras association domain family member 7 (Rassf7), mRNA	1443				0	-
NM_001109492.1	Rattus norvegicus Beta-1,3-galactosyltransferase 2 (B3galt2), mRNA	4463	AC	TT	ACTCACCTTATGGGTGTACTTTCTCTAGTGTTTCTTTTTGCTATGTTTTTGTTTTTCAATCATCATGACTGGTTACCAGGTAGACCAGGATTCAAAGAAAATCCTGTGACATACACTTTCCGAGGATTTCGTTCTACAAAAACTGAGACGAATCAAAGCTCCCTTCGGAACATCTGGAAAGAAGTAGTTCCTCAGACTTTGCGGCCTCAGACAGCAACTAACTCCAACAACACAGAGCTATCACCACAAGGAGTTACAGGACTAGAGAACACTCTCAGCGCCAACGGAAGCATTTATAATGAAAAGGGTACTGGACATCCAAACTCTTACCATTTCAAATATATCATCAATGAGCCTGAAAAATGCCAAGAGAAAAGTCCATTT	384	420
NM_053661.1	Rattus norvegicus G protein subunit gamma 12 (Gng12), mRNA	725	CA	AA	CAAA	4	40
NM_001033909.1	Rattus norvegicus E74 like ETS transcription factor 2 (Elf2), transcript variant 1, mRNA	3199	TA	AT	TATCAGTTCTTCTGTCATTTGACATTCAGGCTCGCATGAACTCGCCAGGTAGCTCTGATACCTGGTGTTTGTTTCCTTTCTCATTCTTTTTCCTTTTCTCCCTTTTTTCTCTTTTTCTTTTTTAGTTGACAT	132	168
NM_001106833.1	Rattus norvegicus lactamase, beta (Lactb), mRNA; nuclear gene for mitochondrial product	1987	GC	AT	GCAAGAAGAAGAATGACTTTGAACAAGGCGAATTATATTTGAAAGAAAAGTTCGAAAATTCGATCGAATCACTAAGATTAT	81	117
NM_001106314.1	Rattus norvegicus interferon induced transmembrane protein 1 (Ifitm1), mRNA	672				0	-
NM_001024880.1	Rattus norvegicus MAGE family member B6B1 (Mageb6b1), mRNA	1467	AA	TT	AATTTCATCACCAAAGAGCTAGTTGACCAAAATTATGTGGAGTACCGCCAGGTTCCTGGCAGTGATCCCCCAACCTATGAGTTCCTCTGGGGTCCCAGAGCCCATGAGGAACACACTTCCAGGAAAGTCATGGAAATT	138	174
NM_001037217.1	Rattus norvegicus monocyte to macrophage differentiation-associated 2 (Mmd2), mRNA	2150	CC	TA	CCAGATGGGCGTGGGCGAGGGTGGGCCAAGACAGGGTGCCTTATACTTTGTTCTAGCACATTCCAAGGTATTTCAGGGCGTCAGCACCTGGAATCCCATATGTCAAAGCCAGTA	114	150
NM_001106175.1	Rattus norvegicus carboxylesterase 2G (Ces2g), mRNA	2480				0	-
NM_001100565.1	Rattus norvegicus pellino E3 ubiquitin protein ligase 1 (Peli1), mRNA	2383	CC	CA	CCCTCCCACCCATGCCTTTAGCCCCTGTGGGCATGTGTGTTCAGAAAAGACAACGGCTTACTGGTCCCAGATCCCGCTTCCTCATGGTACGCACACTTTTCACGCAGCCTGTCCCTTCTGTGCACATCAGTTGGCTGGTGAACAAGGCTATATCAGACTTATTTTCCAAGGACCTCTAGACTAGCAGCTGTCCTCCAGGACTGCATTACAAGTTCATAAGCTAAGTGATTGGGTTTGCCGACCCCTTGTCCGTGTAAGTTTCTCTGCTCTGGTCATTTGCA	281	317
NM_001108209.1	Rattus norvegicus protease, serine, 40 (Prss40), mRNA	1316				0	-
NM_001106145.1	Rattus norvegicus solute carrier family 27 member 6 (Slc27a6), mRNA	2603	TC	CC	TCAGCTGGAGTTCTGGGCGCCCATGCTTCTGTCATGGCTCACAGGATTTGGGGCTGGACTGCTCTCCCTCCACTTCGTGCAGAAACTTCTGTTCCCGTACTTCTGGGATGACTTGTGGTTCTTGCTGAAGTTGGTGCGGTATGGAATTCAGATGGAGATATACAAACTGAGGGGTGAGCTGGTCACGGTGCTGGATAAGTTCCTGAGCCATGCCAGGAGGCAGCCAAAGAAAGCCTTCATCATCTATGAGGGGGATGTGTACACCTATGAGGATGTGGACAAGAGGAGCAACAGAGTAGCCCACGCCCTCCTGAACCACTCCGACCTGAAAAGGGGGGACGTTGTAGCTTTGTTGATGAGTAACGAGCCCGACTTCGTTCATGTGTGGTTTGGCCTGGC…	665	701
NM_001107630.1	Rattus norvegicus vestigial-like family member 2 (Vgll2), mRNA	1595	GC	CG	GCGCGCCCACCCGATCCCCCGACTTCCCTAGGGAAACACCCCCACCCCAGGACCATGTGGCTAAGAGATTGCATGCCATCATTTGTTTCTACGGGTAGATGTCTCTAGAAAGTAGCACCTTGCCCTCGGCCTGGCTCGGTGGTACAGAGGACTCTTTTTCTCCTTTGAATAAAGTAAAGTGAAAACAAGAAAGATTGTAGTCTGAGCTGGTCAGAATGGTAGCCACACGTGACTACTGAGCCTTTGTGGTGTGTGGCTGGGATGAATGGTGATGTGGTCAGACCTAATACACACTGGATTTCCAAAACTGAAAAGGAAAATAATGTAAAACCTCGCCTCG	340	376
NM_001006962.1	Rattus norvegicus TERF1 interacting nuclear factor 2 (Tinf2), mRNA	1679	CT	AA	CTACAAAGCAAAAGGAGAACTGTGTGAATTGCATGGATCCTCTAGGATACTCATCACCACCTTCTAGAGTCAAGAAACCAGTGCTATCCCCGTCCCTATGTAGCTCTGTTATTACCATAGGGGACTTGGTTTTGGACTCTGATGAGGAAGAAAATAACCAGAAAGAAGGGAAGGAGTCTTTGAAAAACTATCAGAAGACGAAGCTTGACACCTATATCCCCATGTTTTGTGACTACATTCCATAGTGTCCTGACTATTCCTTTCTGGCTACATAAACAGTTCTCACTCAGGTCCTCTGGAATACCCTCTGCACTCTGTCCATCCACCCCTGCAGCTCTGCACGCAAAAGTTTAGTGGAAAAGAAGAGGAAGCTGAGACCTCAGTTGCCTGGCTACATTG…	424	460
NM_001127455.2	Rattus norvegicus GDP-L-fucose synthase (Gfus), transcript variant 2, mRNA	1288				0	-
NM_001100990.1	Rattus norvegicus R-spondin 3 (Rspo3), mRNA	1006				0	-
NM_001108683.1	Rattus norvegicus syncoilin, intermediate filament protein (Sync), mRNA	2156	CA	TA	CAGAACCCTGAGTAATGGATAGATCACCACACCCTGAAGTATCATCAAGAACATTATGGATTGCTTTGTGCTGATCCAAACCAAGAACATCTACGGGAAAACATTGGTGTCAAAGTCAGCCAATTTTTGCTACATGGATCCACAACAAAATCTTTTGTGCTACAGGTA	168	204
NM_001108577.2	Rattus norvegicus protein phosphatase 2 phosphatase activator (Ptpa), mRNA	2479	CG	GA	CGAGTGGCTGAGCTGGGACCTGCAGGCTTCCCTGTTCCACTTGGGCCTGCCCTGCTGCACTGCCCATCCTGCCTGTGCCCACCTAGCTTTTGAGGAGTGGACACTGAGAAGCACAACCCAGGGGCTTGGCCAGGGA	136	172
NM_001130509.2	Rattus norvegicus coiled-coil domain containing 166 (Ccdc166), transcript variant 1, mRNA	1727	TC	TG	TCTAAGATCTCGAGTCTCATCTCTGACTCCATCACGCAGGGGCTCGCGGATCTCATCCGTGACCCCGTCACGCAAGGGCTCCACAGTTCCATCCATGACCTCAGGTCCCTTGCGGCCACGGGAGGACTCTCGACTCTCTCCGCAGCCCTCCTTGCGTGAGATGTCTTCAGAAACTGACACACCTGCAAAATCCAGCTCCAAGCTTTTTTCAGGGCTGTCGGAAGATCACTTCCCTCTCAGCCCACAATTGGAAGAGACAGAAAACACTGTGGACAACACACAAACTGTCTTGGAGCAAGCCTGAACATACACGAGGGGGCAGGCCAATAGGTCATGGAGTGGGGAGACATACCTTGGAAGATTTCTTGGTGCATAAATATG	381	417
NM_184049.1	Rattus norvegicus serine/threonine kinase 25 (Stk25), mRNA	2021	CC	TT	CCAAGTCCACATAGCAAGCTGCACAAGGGGACTGCTCTGCACAGCTCACAGAAGCCTGCTGAGCCTATCAAGAGACAGCCAAGGTCCCAGTGCTTGTCCACACTAGTCCGTCCTGTCTTTGGAGAGCTCAAAGAGAAGCACAAGCAGAGCGGTGGGAGCGTGGGTGCCCTGGAGGAGCTAGAGAATGCCTTCAGCCTGGCTGAGGAATCCTGTCCTGGCATCTCAGACAAGCTGATGGTGCATCTGGTGGAGCGTGTGCAGAGGTTCTCACACAGCAGAAACCACCTGACATCTACCCGCTGACCAACCAACTAACTGAATGCACTACTCTTCACAGAGAGGGAGAAGAATGCTTTTTGTTTTGAGCTCTAAAAGGACTGACTTGGAAGCCCTCTTGTG…	773	809
NM_001108545.1	Rattus norvegicus F-box and leucine-rich repeat protein 7 (Fbxl7), mRNA	3473	GA	CA	GAGGCCTCCA	10	46
NM_001108389.1	Rattus norvegicus ORC ubiquitin ligase 1 (Obi1), mRNA	3456	CC	CT	CCCCCTTCAGTCTCCGTGGTCTGCCGCCTTCGTGTCTGAGAAGAGGAGCAAGAATGGGAACCAGTCCGCAAAGCGAAAGATACAGAGCAGCCTCTCCAACGCCAGCCCATCCAAGGCCACCAAAAGCTGACTCACCAGGGACATAGCCTTGTAGGGTGGGGTGTTTGCAGTGTCACCTGAGTCACTTCACGAAGCTTCTTTACAGTCCTGAACTGACGACCTTCAGCCAAGGGTCAAGTCAGAACTGTGGGTCTACCTGGCTCCAGGGATGTTGCTCTGTTGCTTTTGTTTGGTCATCTTTTTAGCCAGAGAGCTTAGGGAGAAGGTCTGACCTGTCTCAGTGTCATGTGTTCTGCTTTTTCAATGAATGTCCTATGTATCTGGATTGGATCCATGTTT…	496	532
NM_001199178.1	Rattus norvegicus apolipoprotein O (Apoo), mRNA	906				0	-
NM_001108981.1	Rattus norvegicus D-aminoacyl-tRNA deacylase 2 (Dtd2), mRNA	623	CA	TG	CAAGCATGTCTCCATCTTGGATCTGCCTGGCGACATTCTGATCATCCCCCAGGCCACCCTCGGGGGCAGGGTGAAAGGACGGAGTATGCAATACCACTCAAACTCTGGGAAGGAGGAGGGCTTAGAGCTGTACTCCCAGTTTGTGTGTCTGTGTGAAAAAGCCGTGACCAACAACAGCAAGTGCGTAGAAGCGGGGGTTGCAGTGGCGCACGGCACGTACGGGAACAGGCAAGTG	235	271
NM_001115034.1	Rattus norvegicus activator of Hsp90 ATPase activity 1 (Ahsa1), mRNA	1391	AA	CC	AAAGGCAAACTTATCTTCTTTTATGAGTGGACCATCAAACTGAACTGGACAGGTACCTCTAAGTCAGGAGTGCAGTACAAAGGACACGTGGAAATCCCCAATTTGTCTGATGAAAATAGCGTGGACGAAGTGGAGATTAGTGTGAGCCTTGCCAAAGATGAGCCTGACACAAGTCTCGTGGCC	183	219
NM_001108643.1	Rattus norvegicus transmembrane protein 72 (Tmem72), mRNA	3368				0	-
NM_001109219.1	Rattus norvegicus transmembrane protein 243 (Tmem243), mRNA	1096	AC	GC	ACTTCGCGAGCTGATGCGGACTCGCTTTTGAGCGGCTGGGGACGAGCGAAGCAACCCCAAAATGGAGGACTTTGCTACCAGGACCTATGGGACCAGCGGCCTGGATAACAGACCTCTGTTTGGGGAGACGTCTGCCAAGGACCGAATCATCAATTTAGTAGTTGGCGGC	169	205
NM_001163723.1	Rattus norvegicus small integral membrane protein 1 (Vel blood group) (Smim1), mRNA	453				0	-
NM_001109559.1	Rattus norvegicus similar to human chromosome 11 open reading frame 52 (C8h11orf52), mRNA	1347				0	-
NM_001109149.1	Rattus norvegicus neuromedin B (Nmb), mRNA	660	AG	TG	AGCCCCGCAGCCGAGCAAGCAAGATTCGAGTGCACCCTCGGGGCAACCTCTGGGCGACTGGTCACTTCATGGGCAAGAAGAGTCTGGAACCCCCGAGCCTGTCACTGGTGGGTACAGCACCCCCTATCACCCAGAGGGAGCAGAGACTACAGCTGAGTCATGATCTGCTCAGGATCCTCCTGCTACAGAAAGCGCTAGGCATGAACCTCAGTGGTCCAGCTCCCCCAATCCAGTACAGGAGGCTGCTGCAGAAGTGACGCCAATAATGGAACAAACACGGCACTGGGCGTAGCATGCGTCCATCCAGGGAAACTGAGGAATGGAACCCTAGCAGTGGCCTCCTCTGGATGTGAAACCTAAGCTCAAATGTGTTACTCTGTTACTGTGATTTCTGGTTGG…	412	448
NM_001107742.1	Rattus norvegicus solute carrier family 43 member 1 (Slc43a1), mRNA	2563	TC	CC	TCTCGATTGGAGAGAGAGTATGCCACGAATTTGCTAGATCCACAGAAGGTGCTCAATACTTCGAAGGTGGCTACGTAGACTCTGGAGGCCAAGAGACTTGGAGGACAGGCAATCAAGGCCTGATAAAGCAAAGGGAATGCCCCGTGGCTTTCTACCTGCATCGTATGCATAGAGCCAGGGGCTGTGGATTTATAAATACTAAGAGTTCTATTTTTGTAGGGACTGGCAAAAAAGGGAAACAAACAGAACAAAAGCCCCAAACCAAAAACAGCCC	274	310
NM_001014072.1	Rattus norvegicus similar to human chromosome 1 open reading frame 159 (C5h1orf159), mRNA	1779	AA	GC	AAGTTTTCTACAGGAGAGACAGAGCCCCTGTCCTGCAGCCTGGTGAAACAGCTGCAATGGTCCCCCTGCCACAGTCTTCAGTGAGAAAGCCAAGATACATCAGGCGTGAGCAGCACCCAGAAAAGAATAGGGATCCTTCTGCCTTCTCCACAGTAGAGGCCCACATCAGCAACGTCTGACGTAGAGGTCAACTGAGATGTCACAATACAGCAGTGGAGGCCTGGGGC	227	263
NM_001108677.1	Rattus norvegicus metal-regulatory transcription factor 1 (Mtf1), mRNA	5300	GT	GG	G	1	37
NM_001109083.1	Rattus norvegicus NSL1 component of MIS12 kinetochore complex (Nsl1), mRNA	2186	TC	CT	TCGCACAGACCTGTCAGCCGCCTCAGATGACACCAGCTCTTGGCTGCCTTGCAGCTATCGAGGCACCCCCAGGAAGGGTTTTGTTGATGCACAGCTCTCTCTGTGTGAGGCTGTGAGGTGGTCCCTGCGGCCTGAGAGTTGGGCTGGCTCTGTACATTCCTAGGCAGTCTATCAGATGAACGCACAGAAAGTGGGCCTGGCTTTAGGTTTGCTCCATGGGCAGTTGATTTGAGGCT	236	272
NM_133555.1	Rattus norvegicus colony stimulating factor 2 receptor subunit beta (Csf2rb), mRNA	2905				0	-
NM_001109010.1	Rattus norvegicus nudix hydrolase 12 (Nudt12), mRNA	3880	CA	CT	CATGTTCACTTGTCTCGCTGGATTTATCGAGCCTGGGGAGACAATAGAAGACGCTGTGCGGAGAGAGGTAGGAGAGGAAAGTGGAGTCAAAGTTGGCCATGTTCAGTATGTCTCTTGTCAGCCGTGGCCAATGCCCTCCTCT	142	178
NM_001114939.2	Rattus norvegicus selenoprotein H (Selenoh), transcript variant 1, mRNA	735	AC	TA	ACAACAGTCGTGTTGAACTCTGGACTGGTA	30	66
NM_001173555.1	Rattus norvegicus sperm associated antigen 8 (Spag8), mRNA	1592				0	-
NM_001014187.1	Rattus norvegicus LanC like glutathione S-transferase 2 (Lancl2), mRNA	1607	CA	GA	CATTTGAACTTGGCTTTGTGCAGAAGGA	28	64
NM_001142941.1	Rattus norvegicus GON7 subunit of KEOPS complex (Gon7), transcript variant 1, mRNA	950	AG	TC	AGGACGCTTTGGATGGTGATGAAGATGATGCAGAAGATGAAAATAACTCTGGTAGAACTAACTCAGATGGACCATCTGCAAAACGACCTAAACCAACTTC	100	136
NM_001047906.2	Rattus norvegicus BUB3 mitotic checkpoint protein (Bub3), mRNA	1364	AA	AT	AAAAGGTCTACACCCTGTCGGTGTCTGGGGACAGGCTGATTGTGGGCACAGCAGGCCGCCGAGTACTGGTGTGGGACCTGAGGAACATGGGCTACGTGCAGCAGCGCAGGGAGTCCAGCCTGAAGTACCAGACTCGCTGTATCCGAGCCTTCCCGAACAAACAGGGTTATGTGTTGAGCTCCATTGAAGGCCGAGTAGCTGTGGAATACTTGGACCCGAGCCCTGAGGTTCAGAAGAAGAAGTACGCCTTCAAGTGTCACAGGCTAAAGGAGAACAACATCGAGCAGATTTACCCAGTCAACGCCATCTCCTTTCACAATATCCACAACACATTTGCCACAGGAGGCTCTGATGGATTTGTAAATATTTGGGACCCAT	378	414
NM_001126283.1	Rattus norvegicus ankyrin repeat domain 49 (Ankrd49), mRNA	2171				0	-
NM_001037212.2	Rattus norvegicus zinc finger protein 94 (Zfp94), mRNA	2476	AT	CC	ATCTGTTCCACAGGAGCAACGTTCTTACACTGCTGATTGCGGCCACACGTGGGGCTTCATAACTGTAAGCGACAGTCACGGGATATTTAGGGACGCTACAAGCTTTCTGCACATCCAGTGACCAAAACCTCAGAATTCATCAGGTAAGAAATCCGAGGGGCTTCTGGCAGCTCTTACCCATGCCGCACCTGTGTGACCTCACTGTAGCCTTCCTCAGAACACACGGTGTGAACCCTTACATGTCACAGTCGCCACACACAGGGCCCACGGGCGCTGCCTGAAGTCTCTCCGCTCAGGGCCAGCGTCGTCGCCTGTTCTAAACCGCACTGCTTTGCTCTTCCTGAAGCACAGCGCCGTACTTACGGTCCTTTCCCATTCTCGTTCTTCAGTGCTCACGCA…	464	500
NM_001011997.1	Rattus norvegicus tropomodulin 3 (Tmod3), mRNA	1628	GA	GG	GAAGACTATGTACCCTACACTGGAGAGAAGAAAGGGAAAATTTTTATCCCCAAGCAGAAGCCAGTGCAGACTTTTACAGAAGAAACTATATCCCTTGATCCAGAGTTAGAAGAAGCCTTGACAAGCGCTTCAGACACAGAACTGTGTGACCTTGCAGCAATTCTTGGGATGCACAGCCTGATTGCAGACACACAGTTCTGTGACGTGCTGGGAAGTAGTAACGGTGACGACCAAGAACATTTTCCGAATGTGG	253	289
NM_001108675.1	Rattus norvegicus collagen type IX alpha 2 chain (Col9a2), mRNA	2954	GC	AT	GCCCAGGAGGCTAGGTTTCTCAAGATCTTGTCTGGAAGGGACCCAGGGGTCCTGAAGACAAGTTCAGTGAGGGAGGGGTTGGGGAAGAGAGAACTGCCCCTCCTAAGGGAAGAGGGTGGCTTTTCTTCCCAGAGGACCAGCTAGCTCTTACCCATGCTGTTCAGCACGGGCCATCCTACCCTCAGGGCAGCGGGGCTGAGGCTTCTGGTGGTCCTTGCCCCATTTTTACCCTCTGGACTTATTTTTATTGGGTCTGCTGGGGGAGAATACCCTGAGGTGTCAGTCCTTAGGCCAGCCCCGCTATTGCCTCTCTGTCTCCCATCCGAGTAT	330	366
NM_001109640.1	Rattus norvegicus solute carrier family 25, member 54 (Slc25a54), mRNA	1669	GG	GT	GGTTAGCAATTGTGCTGGGTTGTAGCACACTGTCGCACACTTTCGGCCAGTTGGCCAGTTTCCCCCTGAACCTTGTTAGAACTCGCATGCAGGCAGCCATGCTGGAAAATGAAACAATACCCATGATGCAGCTCATCCAGGAAATATACACCAAAGAAGGGAAGAAGGGATTTTTTAGGGGT	182	218
NM_001109243.1	Rattus norvegicus eva-1 homolog A, regulator of programmed cell death (Eva1a), mRNA	1741	TC	AT	TCTTGGAAAGGTGCTAAGGATTTCCTCTCCAACCACGTGACAGCGATGTGATGAGCTGAAAGTCCTTCCGAAGTGCTCAGAAGTTTGGGCGGACTTGTGCTATTCCTTTACAAAAGGAAAAAAAAAGTCTCATAGCTGGAGAGCTGGGACATCAGGGTGACCATAACCCAGAAAATGTAATTTTCTAAAGGACTCCGTGTAGAGGAAGTGGTTTTGATTGAGATAGCATGATCCATGCTAATTAT	245	281
NM_001106695.1	Rattus norvegicus mitochondrial E3 ubiquitin protein ligase 1 (Mul1), mRNA; nuclear gene for mitochondrial product	4251				0	-
NM_001014202.1	Rattus norvegicus derlin 1 (Derl1), mRNA	2789	AC	GT	ACTGGGAGTAACGAGGATTAGGACTTGTTGCTAGGCACTCCTATCCCTCTGAGCTGAGTGATCAAAACCATAGTGGAGTTGCTCCTGACACAGGGGATGGGT	102	138
NM_001108731.1	Rattus norvegicus high mobility group 20 B (Hmg20b), mRNA	1676	AC	TT	ACTT	4	40
NM_001271299.1	Rattus norvegicus serine palmitoyltransferase, small subunit B (Sptssb), transcript variant 1, mRNA	2255	AT	TA	ATGCTTTGAAATAAAACTTTTCTGGAAGATAGGCTTATAAGAGACATGATGGAGTCATATTTACACTACTCTTTTCATATTATTCCACATGAAAGGATATGTTACAAAAGTATTCTTCATAGGCTACTGTCAAAAGTACCCTGCACTTGTTTACAATTTA	160	196
NM_001044248.1	Rattus norvegicus Traf3 interacting protein 2 (Traf3ip2), mRNA	2088	AT	AA	ATGCTTTGTGTCCTTAGACCAGTCTGAATCGTGCTCAA	38	74
NM_001106841.1	Rattus norvegicus mitochondrial tRNA translation optimization 1 (Mto1), mRNA; nuclear gene for mitochondrial product	2405	CT	CA	CTCACATTCCGAGCTCATGAGGATGCTGGCTGTGTGTCCCCACAGCGATATAAAAGAGCTTTGTGGATGAAGTCATCTTTAGAAGAAGGTATTTCTGTGCTGAAATCCA	109	145
NM_001107930.1	Rattus norvegicus zinc finger protein 189 (Zfp189), mRNA	2945	GC	TT	GCCTTATTTCGAGCAACCATCTAGGCCTCATCAGAGCCCCAATGCTGTGTGGCTGCTATTCCTGAAGGAGGCGATGGCGTCCCCAAGCCCACCGCTGGAGTCAAAGGAGGAGTGGGGTTATCTGGATGCAGCTCCGAGAAGCCTGTATAAAGATGTCGTGATGGACAGTTATGGAAAGCTGGTCTCGCTGGATGTT	196	232
NM_001109286.1	Rattus norvegicus Bardet-Biedl syndrome 10 (Bbs10), mRNA	2667	CA	TG	CAATCAGACGACGCTGTCATCAGCATG	27	63
NM_001034153.1	Rattus norvegicus speedy/RINGO cell cycle regulator family member E4 (Spdye4), mRNA	1770	GA	CT	GAGGAGTGTGAAGAGATCCAGGCTTACAATCCAGATCTCTGGGTGTGGGCACGAGATCGCACCAACCTGACCTAGAACCCTAAAACTGTGGAGGCCTGAGGTCATCGGCCTGAGGAAGATCCCTGTGCCTGAGCGAGACACTCTATGTCAACATTGAGGGCTGCTGGGGGAAAGGAAAGAGGACTGACTACATTCTTCGAGAAACCTAGAAGAACCCAGACTCTTCTAAAATGAGTGGGATGGAGTCACCACATTGTGCTGCTGGGAGCTGGGACACTTGTAGTGGGTTCTGGGAGGGACCATAAGAAATCAGGATTCCTCCAGGCTCCATTCTTTCCAGAGGCACCATCTAAATGTTATCCCGAATGTCCTCAGTCCCCACCTCCCCAACCGTAGCAG…	528	564
NM_001014254.1	Rattus norvegicus CDC-like kinase 2 (Clk2), mRNA	2136	AG	CA	AGAGCCAAGAGTGTAGAGGACGACGCTGAGGGCCACCTCATCTACCACGTCGGGGACTGGCTACAAGAGCGATATGAAATTGTAAGCACCTTAGGAGAAGGGACCTTTGGCCGAGTTGTACAGTGTGTGGACCATCGCAGGGGCGGAGCACGAGTTGCCCTGAAGATCA	169	205
NM_001005534.1	Rattus norvegicus succinate dehydrogenase complex subunit C (Sdhc), mRNA; nuclear gene for mitochondrial product	1186				0	-
NM_001078647.1	Rattus norvegicus transmembrane protein 134 (Tmem134), transcript variant 1, mRNA	926	TT	CC	TTCTGTCCCTTTCACCTGGAAGACAGAGGCCCTCTGAGACCCTCACCACCACCAGGCCTCTTTGGATTTGCTCAGGAAGTTTGGGACATGCCAGCCTGGGGATATTGCCCTTATCTGATGTGTGCC	126	162
NM_001109429.1	Rattus norvegicus translocase of inner mitochondrial membrane 8A2 (Timm8a2), mRNA; nuclear gene for mitochondrial product	856	GC	TC	GCCCAAGCTGGACAGCCGAGCCGAGCTCTGCTTGGTGAACTGCGTCGAGCGCTTCATCGATACGAGCCAGTTCATTTTGAATCGACTGGAGCACACCCACAAGGCCAAACCGTTCTTCTCACAAAACCTTTCTGACTGATC	141	177
NM_001107488.1	Rattus norvegicus phospholipase A2 inhibitor and Ly6/Plaur domain containing (Pinlyp), mRNA	734	GC	AA	GCAGACTGCCTTCCCGCACCTTACCCGCCTGGCAGGGGAGAGTGAAGAACCAAGAAGTGTGTGATTTGAGGAGCCCTGCAGCTCTCCAGATGCCTGTAAA	100	136
NM_001013207.2	Rattus norvegicus RNA binding motif protein 39 (Rbm39), mRNA	2699	TT	GT	TTTGCAGATTCCACCAGCAGCACAACAAGCTTTACAAATGAGTGGCTCTCTGGCATTTGGTGCTGTGGCAGATTTGCAAACACGACTTTCCCAACAGACTGAAGCCTCAGCTTTAGCTGCAGCTGCGTCTGTTCAACCTCTTGCAACACAGTGTTTCCAACTTTCTAACATGT	173	209
NM_001108340.1	Rattus norvegicus HscB mitochondrial iron-sulfur cluster co-chaperone (Hscb), mRNA	783				0	-
NM_001014134.2	Rattus norvegicus helicase, POLQ-like (Helq), mRNA	3728	CT	TG	CTCTGAAAGGGCAGGAAGCCATGCTGGGGACCTGGCTCTGCGATAGGGCATTGCTGAGATGCCTCAGGCCCTGTG	75	111
NM_001009535.1	Rattus norvegicus PMS1 homolog 1, mismatch repair system component (Pms1), mRNA	3009	AA	AT	AAATAAATACCCAAATGCTGATACTTTGGCTATTCCCTTCCAAAATGATGAATCTAGAAAAAACACTGACCATCAT	76	112
NM_001109515.1	Rattus norvegicus solute carrier family 25 member 28 (Slc25a28), mRNA	1529	GG	AA	GGTCTGACCGTACGGCTGCATCCTGCCCTTCCAGCACATTCTCTTCTGTGGCACACTCCAGTCTCAAGAGGAATTGGAAGGAAGGAGAGAGCTCACTCCAGGCTGTAGTTGGCTAACACGAGTTCTTGCCAACGTCTCTTGCCACCGTTGTCTTTTCTCCTGGGCTCTCTGCAATTCAGCAAAGCCCACTGCAGTCCCTCTGACACCATCTCCATCCTGGGCCTGGCGACCTGCTTTAGACTTGCAGAGGATAAGCAGCACACCCCCTGGTTCCTAA	277	313
NM_001108656.1	Rattus norvegicus cyclin E2 (Ccne2), mRNA	3027	CC	AT	CCCAACCAGCCAGACTCTCCACAAGAAGCCCAGATAATTCAGGCCAAGAAGAGAAAAACAGCACAGGATGTCAAAAAAAGAACAGAGGAGATCACCAAGAAGCATCAGTATGAGATTAGGAATTGTTGGCCACCTGTACTGTCTGGAGGAATCAGTCCTTGCATTATCATTGAAACGCCCCATAAAGAAATAGGAACAAGTGACTTCTCTAGGTTTACAAACTACAGAT	229	265
NM_001114405.2	Rattus norvegicus protein tyrosine phosphatase 4A3 (Ptp4a3), mRNA	1353	GC	TT	GCCTCTTCCCCCTGGCCTGTGTATCGCAGGTGGGCTCTTT	40	76
NM_001007732.1	Rattus norvegicus serpin family B member 9 (Serpinb9), mRNA	1833				0	-
NM_001108422.2	Rattus norvegicus plexin domain containing 2 (Plxdc2), mRNA	2760	TC	TG	TCTTGGTTACACAGATAAGCTCCACCAACCATCCAGTCAAAGTCGGGTTGTCTGATGCATTTGTCGTAGTCCACAGGATCCAGCAAATACCCAATGTTCGAAGAAGAACAATTTATGAATATCACCGTGTAGAACTACAGATGTCCAAAATTACCAACATTTCAGCTGTGGAGATGACCCCACTCCCAACATGTCTCCAATTCAATGGTTGTGGCCCTTGTGTGTCCTCGCAGATTGGTTTCAACTGCAGTTGGTGTAGCAAACTTCAAAGATGCTCGAGTGGATTCGATCGCCATCGGCAGGACTGGGTGGACAGTGGATGCCCTGAAGAGGTACAGTCAAAGGAGAAGATGTGCGAGAACACAGAGCCAGGGGAGACATCTCAAACTACTACGACCG…	843	879
NM_001244768.1	Rattus norvegicus family with sequence similarity 110, member A (Fam110a), transcript variant 1, mRNA	1725				0	-
NM_001109509.1	Rattus norvegicus G protein-coupled receptor 84 (Gpr84), mRNA	1493	CC	TA	CCTTACACCACCATCCTCATGGGCATCTTCTTTGTGGTTGGGCTCAGCAGCGTGGGCGTCTTCTACTGCCTCATCCACCGCCAAGTGAAGCGTGCGGCTCGAGCGCTGGACAAATATGGGCTGCAGGAGGCCAGCATGCGCTCCCATCAGGTGTCTGGGACACATGAAGCTGTGCCAGGCCACTTCCAGGAGCTAGACAGCGGGCTTGCATCAAGAGGTCCCAGCGAAGGGATTTCATCTGAGCCAGTCAGTGCTGCGACGACACAGACCCTGGAAGGTGATTCGTCAGAAGCGGGGGACCAGGGCATGAGAAAGGCAGCTCAGCAGATCTCAGAGAGAAGCCTTCCAGAAGTGCATCGCAAGACTGGAGGAGCTGCAGGAGCACGCAGAGCCACGGAT…	832	868
NM_001109257.1	Rattus norvegicus kelch-like family, member 42 (Klhl42), mRNA	3228	GG	CT	GGTCTGCTTTGAACGGGTCGAGGTCAGTAGCTAAGATCACAGTAGCAATGGCTTTCTTCTGTGTTTTTCCCGTTGGGAATGGAACCCAGGGCCTCACGCGAGTCCCGAAAGGATGACT	118	154
NM_001108669.1	Rattus norvegicus 3-hydroxyacyl-CoA dehydratase 4 (Hacd4), mRNA	1036				0	-
NM_001106215.2	Rattus norvegicus SPARC related modular calcium binding 2 (Smoc2), mRNA	2718	GC	GT	GCCATCCTGCTAGGGACCATTGGAAAGGAAAAATGCCTTCTGCAGAGATCATGGACCACATCCCGTGGAAGGCAGAGCTAGACTGGATCGCTCCAAGAGTGCCGAGCAACGGGCAGCTGAGAATGTCACTTTGGTTCTGTGGGTGCCTGGGGGTTTGAGGGGATTCATCCAAGGCCCTTATGGGATGAAGGTTAGGAACTGGATGACCACACTGTGAGGGACGGGACTGGGCTGGGCTGTGTGCATAGTTGGCTGCCACTCTCTGACCTAGGTCGATCTGTACTCTCTGTTCTCAAGGAACACTTGCAGATGGGGCAGAGTTGGGGCAACTCTTTCAGATTGGGGT	346	382
NM_001106288.1	Rattus norvegicus switching B-cell complex subunit SWAP70 (Swap70), mRNA	3871	CT	TT	CTTCAGTAGCACTGTGTCTGGGAAGTGAAAGTCCTTT	37	73
NM_001173438.1	Rattus norvegicus interleukin 20 receptor subunit beta (Il20rb), mRNA	1107	TG	GG	TGCACCTAGAAACCATGGATCCAGGGGTCATGTACTGCGTGAAGGCGCAGGCGCTGGTGAAAACCATCGGGAGGCACAGTGCCTTCAGCCAGCCTACGTGTGTGGAGATGCAAGGAGAGTCTCTTCCGCTGGCACTGGCTCTGTTTGCATTTGTTGGCTTCGTGCTGATTCTTGTGGTTGCACTGCTCTCCGTCTGGAAGATGGGCCAGCTGCTCCGCTATTCTTGCTGCCCCGCTGTTGTCCTTCCTGACACCTTGAAAGTAACCAGCTCATCCCAGAAGCTGATCCGCTGCAGAAAGGAGGAGGTGGATGCCTGTGCCGTGACCGTGCTGTCCTCGGAGCATCTCTTTGGGGTCTGGATCTCGCAGACTTGAGAAGCACTTGATGGG	389	425
NM_001107998.1	Rattus norvegicus solute carrier family 35, member E2B (Slc35e2b), mRNA	2401				0	-
NM_001025742.1	Rattus norvegicus DAZ associated protein 1 (Dazap1), mRNA	1574	GC	TT	GCTCAGGGGGTCCCCCCGCTGGTGGCAGTGGCTTCGGACGTGGGCAGAACCACAACGTGCAGGGCTTCCATCCCTACAGGCGCTAGCCAGGGGGACGGCAGCAGGGCAGGATTTGGGACTGGTGAACTCGTGACAATCACACACTCGCTCGGGACAAAATAAATGACCACTCGACCTGGGGGGGAGGGGCAGCGAAGGCCGCGTCTGGACTGAGGTT	217	253
NM_001012212.1	Rattus norvegicus calreticulin 3 (Calr3), mRNA	1424	GT	CA	GTCTGCATGCTGACGACTGGCCCAGCTGCAACTCTGCA	38	74
NM_001108688.1	Rattus norvegicus cytidine deaminase (Cda), mRNA	944				0	-
NM_001109105.1	Rattus norvegicus COMM domain containing 6 (Commd6), mRNA	909	AG	AA	AGGTCCCAGGTTCAATTTCCAGCACCCATGTGGACGCTCACACCTGCCTGTAACTCCAGTACTGGAGGCCCCGACACATGCAGGCAAAACACCAATGCATATAGAGTAAAAATAA	115	151
NM_001173349.1	Rattus norvegicus ring finger protein 128 (Rnf128), mRNA	1825	GT	AG	GTGCAGGAGACATTGTTGCGATCATGATTGGCAATCTGAAAGGAACAAAAATTCTACAGTCCATTCAAAGAGGCATCCAAGTAACAATGGTCATCGAAGTAGGCAAAAAACATGGCCCTTGGGTGAATCATTATTCAATTTTCTTCGTTTCCGTGTCCTTTTTTATTATTACAGCAGCAACTGTGGGCTATTTTATCTTTTACTCTGCTCGAAGATTACGGAATGCAAGAGCTCAAAGTAGGAAGCAGAGGCAG	254	290
NM_001109483.1	Rattus norvegicus leucine rich repeat protein 1 (Lrr1), mRNA	1496	GA	AC	GAACTTACTAAC	12	48
NM_001109501.1	Rattus norvegicus Rho GTPase activating protein 10 (Arhgap10), mRNA	2618				0	-
NM_001109121.2	Rattus norvegicus signal transducing adaptor molecule (Stam), mRNA	3022	AG	CC	AGCAGCTGGCTTCCATCAGCCAAGGAGCAGTTCCTCCCTCTGCAACCCCAGCCCTTCCTAATCAGCAGGCCCAGGCTTCTTACCCGAATGCAATGGTTAGTTCTGTTCAAGGAAATTCGTATCCCAGCCAGGCTTCAATATACAGTCCTGCTGCTGCTGCTGCCGCTGTCGCTGTCACTGCAGTGCCTGTGCCTGCTGATGTCACCATCTACCAGAATCCAGGACCTAACATGTCCCAGGTGCCAAACTATACC	254	290
NM_001013058.1	Rattus norvegicus RNA binding motif protein 17 (Rbm17), mRNA	1560	GA	CA	GAAGGTCAGGGGCTGGGGAAACATGAGCAAGGGCTAAGCACTGCATTGTCCGTGGAGAAGACCAGCAAGCGTGGCGGCAAGATCATTGTTGGTGACGCCACAGAGAAGGGCGAGTCTCAGGATGCATCCAAGAAGTCGGATTCAAATCCA	150	186
NM_001108014.1	Rattus norvegicus structural maintenance of chromosomes 6 (Smc6), mRNA	3819	CG	GG	CGGCGAGCGCTCTTTTTCCACAGTGTGCTTCATTCTTTCCCTGTGGTCCATTGCTGAATCACCTTTCAGATGCCTGGATGAGTTTGATGTCTACATGGATATGG	104	140
NM_001115042.2	Rattus norvegicus cell division cycle associated 5 (Cdca5), mRNA	1508	AA	CT	AACCCACTGTCACATTCCTGTTCACACTCCTGAACACTCCTGAGCCCAGAGATGAAGAAACGGACACAGAGATATTGGAGAATCAGTTCGTGGATCAGGATGACTGGGGCCCTAGGCGGACCTCAGAAGAAATACAGCTTTTGCAGATGGACTGCAATAGGCTTCAGGAAGCTCTGTACGCTAACCAGAGGGAAAACCTGATCCTTGAAGAGAAGCTAGAAAACCTGCCTACCTTGTTGTACGGGGACCTGGAGAACATTTTGATCAGTCCAGAGGAATCTAGGGTCACCCAGGACACAGATAAAAACACCCAAGGCCAAGCAGAGGACATCTATGAGGAAGCAGAGGACATCCATGAGGAAGCAGAGGACATCCAGGAGGAAGCAGGGGTTACCCAGG…	533	569
NM_001037358.2	Rattus norvegicus LIM domain only 2 (Lmo2), transcript variant 1, mRNA	1639	CG	AA	CGCCTCTACTACAAGCTGGGACGGAAGCTGTGCAGGCGAGACTATCTCAGGCTTTTTGGACAAGATGGCCTCTGTGCTTCCTGTGACAAGCGGATCCGTGCCTATGAGATGACGATGCGCGTGAAAGACAAAGTGTATCACCTGGAGTGTTTCAAGTGCGCTGCCTGCCAGAAGCATTTCTGTGTAGGTGACAGATACCTTCTCATCAACTCCGACATAGTGTGTGAACAAGACATCTACGAGTGGACCAAGATCAATGGGATCATCTAGGCCAGAGTCCCAGGCACCTGTGGGGAGGTGTTCAGTGGAGACGCTGGCTCCGCGGTCTTCGGGCTTAGGCACTTTGGGAACCTGAGGGTGGGTGAGGCATTTCTTAGGAGACTATGGACTCTTCCTGGG…	636	672
NM_001108323.1	Rattus norvegicus transport and golgi organization 2 homolog (Tango2), mRNA	1571				0	-
NM_001108232.2	Rattus norvegicus ankyrin repeat and SOCS box-containing 1 (Asb1), mRNA	2044	CC	CT	CCCCCTTTCTCAAGGCGGCTAACCTCCTTAGTGGTCTGTCCCCTATACATCAGTGCTGCCTACCACAACCTTCAGTGCTTCAGGCTGCTCTTGCAAGCTGGCGCAAATCCCGACTTCAACTGCAATGGCCCTGTCAACACTCAGGAATTCTACAGGGGCTCCCCTGGGTGTGTCATGGATGCTGTCCTGCGCCACGGTTGTGAGGCAGCCTTCGTGAGCCTGCTGGTAGAGTTCGGAGCCAACCTCAACCTGGTGAAGTGGGAATCCCTGGGTCCAGAGGCAAGAGGCAGAAGAAAGATAGACCCTGAGGCCTTGCAGGTCT	322	358
NM_001126300.1	Rattus norvegicus immunoglobulin superfamily containing leucine-rich repeat (Islr), mRNA	2081				0	-
NM_001107794.2	Rattus norvegicus myosin heavy chain 7B (Myh7b), mRNA	6097				0	-
NM_001109130.1	Rattus norvegicus translin-associated factor X interacting protein 1 (Tsnaxip1), mRNA	2590	AA	CC	AAGGAGCATGAGATGCTGCTGCAGTTGCACATGAGCACACTAAAGGAGCGGGACCAGTTCTATAATGAGCTGCAGGAGATCCAGCGCACCTCTACACCGCGGCCTGACTGGACCAAATGCGAAAGTGTCATAGCAGGGGGCCAGGAACGCTGGCTAGTGCTGGCTGAAGGGAAGAACAGTGACCAGCTGGTGGATGTGCTCCTGGAGGAAATTGGCATGGGTCTGCTTCGGGAGAAGGACTTCTTCCCTGGCCTGGGCTTTGGGGATTCCATCCCTCCATTCCTTCGGTTTGATGGCCCTGTGAAGAACAAGAAGCCCAGCAAAAAGGAGGTGGTAAATCTCC	343	379
NM_001130580.1	Rattus norvegicus ENY2, transcription and export complex 2 subunit (Eny2), mRNA	2048	GC	GA	GCAGCTGAAGAGTGTGGTAGGTAACGGTCGTCAGCGCAAGGGTCATTTCGTCGCTGGGAAGGGACGGCCCTCGCCCGCGGTGATGGTGGTTAGCAAGATGAACAAAGATGCGCAGATGAGAGCAGCGA	128	164
NM_001106050.1	Rattus norvegicus DnaJ heat shock protein family (Hsp40) member C15 (Dnajc15), mRNA	780	AC	TT	ACGCCGACATCGACCACACAGCGGGAAGAAGGCTGCTGGCTGTAGGACTAGGTGTCGCAGCTGTTGCATTTGCAGGTCGCTATGCATTTCAAATCTGGAAACCTCTAGAACAAGTACTCACTGCAACAGCAAGGAAGATTTCCTCTCCAAGCTTTTCATCCTACTATAAAGGAGGATTCGAGCAGAAAATGAGTAGGCGAGAAGCCAGTCTCATTTTAGGAGTAAGCCCATCTGCTGGCAAGGCCAAGATTAGAACAGCACACAAGAGAATTATGATT	278	314
NM_001017512.2	Rattus norvegicus zinc finger protein 61 (Zfp61), mRNA	2093				0	-
NM_001108866.1	Rattus norvegicus abhydrolase domain containing 4, N-acyl phospholipase B (Abhd4), mRNA	2399	GC	TG	GCAGTTCCTGCCTCCTCCTTCACTTTTATAAAGCCAACCCTTTCACCAGAATAGTG	56	92
NM_001106073.1	Rattus norvegicus LSM4 homolog, U6 small nuclear RNA and mRNA degradation associated (Lsm4), mRNA	911	GC	TG	GCGCCTTTGCGTGAAGCCCCACTTGGCGTCTGATCCAGTGAAATCCCTGACTGGCCACTTACTCAGTTTCTGGAAGGTTCCCAGTCTGAGTTGACTG	97	133
NM_001109098.1	Rattus norvegicus sentan, cilia apical structure protein (Sntn), mRNA	1188	GA	CT	GACCACACGAACCACTCCAGAGGAGAGCCCAGTCCTTCTGAAGCCCCAGCAGTCATTTCAGCACATAGCAAAATGCCTAAAAGTGTTTCAATATCTAAACAACTGGCTTCAATAAAAGCTTTGAAAAGGGGGTCAGATCTGGAAAAAGCCATGGCTACTATTGCTCTGGTTTTCAGAAATGCTTCTGATCCTGATGGTAAACTTGGGAAAGCCACTGCCAAGAATCTGCTTCAAACCCAATTTAGGAATTTCACTGAGAGAGAGGAAACCAAGCCAAAATCCCGAGACCTCCTTTCTGAGCTTGATGAGCACACAGAAAAGAAGCTGGACTTTGAAGACTTCGTGATCTTGCTCCTGAGCCTCGCCATCATGTCAGATCTGCTACAAAATATATGGAGT…	423	459
NM_001044258.2	Rattus norvegicus carboxylesterase 2H (Ces2h), transcript variant 1, mRNA	2065	GT	TA	GTCACCATTTTTGGCGAGTCAGCAGGTGGCACAAGTGTGTCTTCACACGTTGTGTCCCCCATGTCCCGTGGGCTCTTCCATGGTGCCATCATGGAGAGTGGGGTGGCCCTGATGTCGAGCCTCATCTCAGTATCTTCTGACGTTGTCTATAGAACAGTGGCCAACCTTTCTGGATGTGAGCAGGTGGACTCCAAGGCTCTGGTGAACTGTCTACGAGGCAAGAGCGAGGAAGAGATTATGTCTA	244	280
NM_001039612.2	Rattus norvegicus transmembrane BAX inhibitor motif containing 7 (Tmbim7), mRNA	1294				0	-
NM_001012148.1	Rattus norvegicus ankyrin repeat domain 13a (Ankrd13a), mRNA	3672	CG	GT	CGCAGGCATTCACCCCCATGAGGCTGTGCTGATCCCGTGGTAAGACAGTACCCCCCTCTGTTCTGTGTCTGTTTCCTGTTATGCTTCTCTGGGGATAGGAAGAGAATCCACCATTCCCAGGAATGTCTGTTTGATACAGTCAGTGTTGCCAGTAAAATGTTCTGAGACACAAAGAATTGTTGAGT	185	221
NM_001304747.1	Rattus norvegicus sphingomyelin phosphodiesterase 5 (Smpd5), mRNA	1972	GT	AA	GTCTCCGTAGCCCCCACCCCCAGGCGTGTGGAGGCAGAACACGTCCTGCGAAGAGCAAGTGCAACACAGGTGTGGCCTTGTCCCAGTAAGAGACAAATCACTCAACCGCCCTGTTTCCGTTTGGGAGCCAAA	132	168
NM_001108503.1	Rattus norvegicus RNA polymerase III subunit E (Polr3e), mRNA	3007	GC	GT	GCCTTCTTTGCAGTACAATTTGAAATTCCTGATGTATTTTGCTTATTGGGTTTCATTCTCATAATAAAGAGAGTGTACACTGACATGGGCAGGATTATGAAAATCATGGT	110	146
NM_001034997.1	Rattus norvegicus nuclear receptor binding protein 1 (Nrbp1), mRNA	2152				0	-
NM_001109177.1	Rattus norvegicus LMBR1 domain containing 2 (Lmbrd2), mRNA	3569	AA	TT	AAAGATAAAAACAGCCCTGATTGAGAATGCAATCTACTATGGCACTTACTTACTGATATTTGGAGCATTTCTAATTTATGTAGCTGTAAACCCACGTTTGCATTTAGAATGGAACCAACTTCAGACTATTGGAATAGCTGCTGCCAACACATGGGGTCTGTTTCTCCTCGTGTTATTATTGGGGTATGGCTTGGTGGAAATTCCTAGGTCATACTGGAATGGAGCCAAAAGGGGTTATCTTCTTATGAAGACTTATT	257	293
NM_001126288.1	Rattus norvegicus phospholipase D family, member 4 (Pld4), mRNA	1989	GG	TT	GGCCTGAGATTGTCACCAGGCAAACAGCTTCTGGCAGAGCTCTAAATGGCTT	52	88
NM_001109306.1	Rattus norvegicus SATB homeobox 2 (Satb2), mRNA	3005	AA	AG	AACCAAGTGCCCGCACTGCAGCCCATCATGAGCCCTGGTCTTCTCTCACCGCAGCTCAGCCCACAGCTGGTCAGGCAGCAAATAGCTATGGCTCATCTGATAAACCAGCAGATCGCCGTTAGCCGACTTCTGGCTCACCAGCATCCTCAAGCCATCAACCAGCAGTTCCTGAACCATCCACCCATTCCCAGAGCAG	196	232
NM_001107782.1	Rattus norvegicus BTB domain containing 3 (Btbd3), mRNA	2398	GG	TA	GGTA	4	40
NM_001129879.2	Rattus norvegicus proteasome assembly chaperone 4 (Psmg4), mRNA	557				0	-
NM_001109498.1	Rattus norvegicus cyclin-dependent kinase 2 associated protein 2 (Cdk2ap2), mRNA	907	CC	CC	CCACTGCAGAGCACCTGCTTCTCCCTGGCCTTTGCCCCAAGTTGCTTCCTATCCTGGGCTTCCTGTCCTGTGTTCCTTGGTGGGCACCTTTCAGGAACCAGGTAGCAGATCTTCATCCAGTTGGCTGTACAGACTGGTCTCTCCCTCTGCAGGAGTGCTGAGAGGCCACCGTGAGTCCCATCTGTGACCTGATCACAGTGCTGATCTAACTGGAGCTTCCTCTCTGTGGTCCCACCACATGGCACTTACTCC	252	288
NM_001109305.1	Rattus norvegicus transmembrane protein 182 (Tmem182), mRNA	2708	CT	TT	CTGGAGTATTTTTCTCTCTGCTCGCTGGGCTACTCTTTCTTGTTGTTGGGTGGCATATCCAGACGCATCACTAAACCTTTGCCACTGCGGTTTTCAGGAGACATTTCACAGTACCACACTCCCCCTGTGCGTTTTGTGTTAGCAATGGTAGCTGCAGAAAATTAGTGGATATACATTTGGAGTTGTTATTCCTCAATGAGTCATTTTACTTGTGATTTCTCCTCATGAGGAAAGCCTTTGACTTCTCTAGAACCCAAAGTTGTCTGTGCTGGCAAGGAGCTAGTTCTCCAGGGAGCAGGTAGTGGGTCCATCCTACGGTTTGGTGTAAACATAGGGTGCGTAATGTGATCACCCACAGCAAACCAAACTAGGTTGAATGTCTCCTTGACATTCGTTTCT…	407	443
NM_001109091.1	Rattus norvegicus activating signal cointegrator 1 complex subunit 2 (Ascc2), mRNA	2626				0	-
NM_001127567.1	Rattus norvegicus similar to human chromosome 12 open reading frame 56 (C7h12orf56), mRNA	1977	AA	GG	AAATTCCTGTTTCCAGTTCACCACAGCAATGCTAACAGAAAGG	43	79
NM_212458.1	Rattus norvegicus 1-acylglycerol-3-phosphate O-acyltransferase 1 (Agpat1), mRNA	2091				0	-
NM_001025139.1	Rattus norvegicus zona pellucida binding protein (Zpbp), mRNA	1445	GA	AA	GATGGAACTCACTGCCTCCAATGCAACAACAGCGTGGTGTATGGAGCGAAGACATGCATGTAGGCCAGGGCCTTGTGGGACCCAGTCGCTCATTCAGCAGAAAAGTATATTTTTGAAGTACTAAAGTATAATAACTCACTATTATGCCGAAA	152	188
NM_001025014.1	Rattus norvegicus transmembrane protein 50B (Tmem50b), mRNA	2289	GT	TT	GTGTCAAGGACGGCTTGCCACAATCTGGCATTACACACGGCAAGGGACCCTGCTGCAGGTGCTGTGTAGACATGGCCAAGTGGAATAACTAGCTAAGACCATCCCGAAGGGCGCTGTGACCTACAGAAGGTCAGACGCTCGACTCACTTCATTCTGGACTCCCTCTGCTGTCTCAGGCTCTCAGGCTCTCAGGCTCTGGGTGACACTCCACACCAGACGCTCCTTCCCTGTGTTTGACGCTGCGCTCGCACCGTGTATATTTCTGTGGGCCTTTCCCTGGGGTCAGGATTTTGTGTTGCACTT	303	339
NM_001113780.1	Rattus norvegicus transmembrane protein 222 (Tmem222), mRNA	1490	GG	TT	GGATAGAAGCCTTTAGGTCCAAAAGGTAACTCATCAGAGCAGCTGGTGCCACTGATTGGCTAGGTCTGCTTCCGATTGCTACAATGGGCCCTGTGCAGCCTGCCTCCCCCTGGTCCACAGGCTCCTTTATAAGGGGCTCCCTGGCAGGAAATAAAGTT	158	194
NM_001002822.2	Rattus norvegicus coiled-coil alpha-helical rod protein 1 (Cchcr1), mRNA	3067				0	-
NM_207613.1	Rattus norvegicus cadherin 15 (Cdh15), mRNA	2736	GA	AA	GACTGGGGCCCCCGCTTTGCTCGGCTGGCGGACATGTATGGGCATCCGTGAGAGCCAGAGCCAGGGGCAGACGTCCTGTGTGGACACGCCCACTCGGCCCAAACAAGGAGGCTCTCTCCTGGGACATGCACCCAGAAATCCTATGAGGGTCAGCAGCACGACCCATCTTTGGCTCCATGGCAGATAAACTCACTGAAGGTCATCTGTGTGAGCTCCAGGGGAGGACTGAGTCCTGTATGGGCTAGGCAGCGGAGGGAGAGCGCTCTCCCTCTGGAGTGCAGAAGCCACCTTCAATCACCCTGCTAGGGTTCATCCCATCTTTGTGTCCCAGTTGTGACTCTCACCTCTGTATGAAAGCAGGCATCTAAGGAGCAGATTGGAA	382	418
NM_001107773.1	Rattus norvegicus serine/threonine kinase 35 (Stk35), mRNA	3393				0	-
NM_001115037.1	Rattus norvegicus mediator complex subunit 18 (Med18), mRNA	1536	AA	AA	AAGGGCATCATGAAGATTGTGGTGTACAAGATTTTCCGAATCCTGGTCCCAGGGAACACAGACAGCACTGAGGCCCTGTCGCTCTCTTATCTTGTGGAA	99	135
NM_001108446.1	Rattus norvegicus ATP binding cassette subfamily E member 1 (Abce1), mRNA	3452	CC	CC	CCAGCCTAACAGTGCTCTGGCCCCAACACAGTGTACACACACACACACACACACACACACACACACACACACACACACACACACCCTACAGATACAGTCTTTATAGTTGGTGCCTACGTATCTGGATTTTAGGGGTTTAGTTTTGTTTTATTTTGAGACAGTGTGTCCTACAGCCCAAATTGGCCTCAAATTAGTTATTGAATTTCTCAGCCCATGCCTAGGCTTAGGTTACGCAGTACTGAGGATCAAGCCCAAGGCTTGGTGTGTCCTAGGCAAGCACTCTAACAACTGAGCTACATCCCAGCCCTACATGTTTCTAGACTACAGCAGCCAAGGACACCC	342	378
NM_001109100.1	Rattus norvegicus tubulin polymerization-promoting protein family member 2 (Tppp2), mRNA	608				0	-
NM_001100901.1	Rattus norvegicus syntrophin, alpha 1 (Snta1), mRNA	2135				0	-
NM_001024312.1	Rattus norvegicus speedy/RINGO cell cycle regulator family, member E4C (Spdye4c), mRNA	2205	GG	GT	GGTCACAGTGGTACTTGCAGCCTTGACAAGTGCAAACAGGATTGAAAACAAAAGAGACAAAGACATAAATTTGGGACACTATTGTTTTGGTTATACTTCAACTCATTTTTGTTATAATTGCTTGTAATTTGATTATACCTTTTGGTTATAATTTTTGTTATTTTCACTATAATTTGGTTAGATTTGTTTCATCGTAAAATTTTAGTTTTGGTTATATTTGGTGTTTTATGATATTTTGGTAATAGTACTTCTGT	254	290
NM_001109204.1	Rattus norvegicus RAD51 recombinase (Rad51), mRNA	2167	GA	TA	GAGGGCTTCCAGGAAAACAAGGATGGTGTCAGCTGATAGCAGAAACAGGTCTGATTGGAGATGTCAATCTCTTCTTACTGTACTAATAACTTCTGTA	97	133
NM_001108033.1	Rattus norvegicus small nuclear RNA activating complex, polypeptide 1 (Snapc1), mRNA	1692	AG	GT	AGAGATGTGAAAGAGCAGTGTCTTTGGCAAAAATAAAAGCAAAAGCATTTTCAGCTGTTGCCCAGGTGTCCAAGTCCAGGAGGCATCGCCAGTCCAAGCTTGACTCTTCTGACTCGGATTCTGGGTCTGGACAAGTACAAGGCAAAGCAACTAAGAGAAAGAGAACCAGAGAGCCAGCAGAGCCAGCAGGAAGGAAGCAGCGGCCTTCCAGGAGCAAAGGTGATGTTCCAAATGAACGCAAGGAAGAGAAGTCTTTACGCCTGAGTATGCCTGTAATTACAGAGGAGGAGGAGGAGAGCTCGGATGGCCTCAGCAAAGCAGAGTTCACTGCACCGAAGAGGAAGAGAAAACACTGAACCAGGAGACTGGTGGAGT	375	411
NM_001172159.1	Rattus norvegicus DIS3-like 3'-5' exoribonuclease 2 (Dis3l2), transcript variant 2, mRNA	3126	AG	TT	AGCATTCCCTGGGTCTGGAGAAGGAGTCTGATGAGGAGCCTGAGGACTGAATGCTAGCCCAAGCCAGGCTTGTGCCTGCCCTACCCTGCTGGCTTTTAGGAATAGGACCTTCTGACACCAAAGGGGATTT	130	166
NM_001107784.1	Rattus norvegicus RNA polymerase III subunit F (Polr3f), mRNA	4598	GC	TT	GCACCCTGTGGACTCTGTCCCGTTTTTGATGACTGCCATGAAGGTGGTGAAATTTCACCATCTAATTGTATTTACATGACAGAGTGGCTCGAATT	95	131
NM_001134546.1	Rattus norvegicus RAB11 binding and LisH domain, coiled-coil and HEAT repeat containing (Relch), mRNA	5458	AA	GC	AATTGGCTGGTTGTCTACACAGTGACACAGAGTGCTGCCTATGGAATGGGGTGACTGGC	59	95
NM_001109676.2	Rattus norvegicus ankyrin repeat and SOCS box-containing 17 (Asb17), mRNA	930	AA	AG	AAGACTTCTTTTCCAAGAGGCAATATATTCTGCAACCTCATTGACAAGATAG	52	88
NM_001109230.1	Rattus norvegicus zinc finger protein 398 (Zfp398), mRNA	3456	TG	TT	TGATCTGGTTTTTCCATTTCTGGTGTTTGGTTTTTTTTCTCTCTT	45	81
NM_001109171.1	Rattus norvegicus leucine rich repeat containing 20 (Lrrc20), mRNA	3034				0	-
NM_001108620.1	Rattus norvegicus nucleoporin 205 (Nup205), mRNA	6230	CA	TG	CAGATTCTCCTTCCAGCCCTCCAGCTATGCCAGGTCATCCTCACATCCAGTATGTCCCAGCACTTGCAGGCAGCAGGGCAGGTGCTGCAGTTTCTCGTTTCACATTCTGATACCATCCAAGCGATTCTGCGCTGCCAGGATGTTAGTGCTGGCTCTTTGCAGGAATTAGCCCTGCTGACAGGAATCATAAGTAAAGCAGCGCTTCCTGGTATG	213	249
NM_001108979.1	Rattus norvegicus ATPase H+ transporting V1 subunit E2 (Atp6v1e2), mRNA	992	GT	TC	GTTGAACTGCAGAGTC	16	52
NM_001009600.1	Rattus norvegicus Rho GDP dissociation inhibitor beta (Arhgdib), mRNA	1157				0	-
NM_001130569.1	Rattus norvegicus metallophosphoesterase domain containing 1 (Mpped1), mRNA	3189	GA	AT	GAGGTGGCGCAGTGACAGAGCTGCCCTGGGTGCTGATGGCAACCCTGCCTCTGGCTGCAGGCTTTCTTCAGTTAGGCCTGGGTGAGCCCAGAGCGGGCAGAGCCAGTAGGCTCTGAGTCAGGGGGAGGCAGAGTCCATCGCTGTCTAT	148	184
NM_001098793.1	Rattus norvegicus PRKR interacting protein 1 (Prkrip1), mRNA	1391				0	-
NM_001130506.1	Rattus norvegicus DNA polymerase delta interacting protein 3 (Poldip3), mRNA	3485	AC	AA	ACACTGGTGAACAAGGAGGAGCTTCCCAAAGAGCTGCCACCTGCCGAGCCTGTGCTTAGCCCCTTGGAAGGCACCAAGATGACTGTGAATAATCTGCACCCTCGAGTCACAGAGGAGGACATAGTTGAGCTTTTCTGTGTGTGTGGAGCTCTCAAGCGGGCTCGACTGGTCCATCCTGGGGTAGCAGAGGTTGTTTTTGTGAAGAAGGATGACGCCATCACTGCTTATAAGAAGTACAACAACCGATGTCTGGATGGGCAACCTATGAAGTGCAACCTTCACATGAATGGGAATGTCATCACCTCAGACCAACCCATCCTGCTGCGGTTGAGTGACAGCCCCTCAGTGAAAAAGGAAAGTGAGCTGCCGCGGAGGGGCAATCCTGTCTCTTCCAACCCT…	487	523
NM_001107861.1	Rattus norvegicus kelch repeat and BTB domain containing 2 (Kbtbd2), mRNA	3434	TG	AC	TGGTCTCTGCGGCAGCATATATCTGAACGTGTATTGTGGGACCTAGGGAGAGATTTTCGATGCACTGTGGGGAAACTTTATCCATCCTGTCTTGAAGAATCTCCATGGAAGCCACCAACTTACCTTTTTTCACCAGATGGAACAGAGGAGTTTGAACTGGATGGAGAAATGGTTGCACTTCCACCTGTATAGGGGAGTCGAGGGAGTGCACATGCTGAACTTGGGATATCCTTTGCTAAACCAGAGGATATAATAGGACAGAGTATGAGTACATAAAAATCTATCTTTGATACATTTTATTTTTATGCCCTAC	313	349
NM_001164043.1	Rattus norvegicus MAPK activated protein kinase 5 (Mapkapk5), transcript variant 1, mRNA	1699	GA	GA	GAGTGCAAACTCCTGCGGGACGCGCTGCAGAGTTTTAGCTGGAATGGTCGTGGATTCACAGATAAAGTGGACCGA	75	111
NM_001108655.1	Rattus norvegicus pleckstrin homology and FYVE domain containing 2 (Plekhf2), mRNA	2851	TC	AT	TCAGCCCTTGACCATCCCTGGGCGGGTGCTTATTGGAGAAGGAGTATTGACTAAGCTGTGCAGAAAGAAGCCGAAAGCAAGGCAGTTTTTCTTAT	95	131
NM_001033866.1	Rattus norvegicus surfeit 2 (Surf2), mRNA	1186	AG	CT	AGGTATCAGAGAGCACTTCAAAAATATGAAGAGTGTCAGAAACAAGGGGTGGAGTATGTGCCTGCCTGCCTTCTACACAAGAGGAAGAAGAGGGAGGACCAGATGGATGTCGATGACCTCCCAGGCCAGAGAACAGAATTCTGGGAACCAACTTCCAGTGACGAGGGAGGCGCCTTGAGTGATGACAGCATGACAGACCTATACCCACCTGAGCTGTTCACAGAGAGAGAACTGCTCAAGCCTGAAGACTTTCAGACAGACCAACAGGAGAAGCCCAAACAGTCAGAAAAGAGCACTGCACAGAGAGAAGCCAAAGTGGGCCACAAGAGGGGCCGTAAACTCAGGAAGAAGGAGCTCACCCCGTTGACCAAGAAGTTCAAAAGCCATCATCACAAGCCC…	415	451
NM_001106718.2	Rattus norvegicus CYFIP related Rac1 interactor A (Cyria), mRNA	1380	AG	AT	AGTACAGGAGCAGGTTTACAAGTGAGGAGACACTGATGTTCTGCATGAGGGTGATGGTGGGGGTCATCATCCTCTATGACCATGTGCACCCCGTGGGAGCTTTCTGCAAGACATCTAAGATTGATATGAAAGGCTGCATAAAGGTGCTGAAGGAACAGGCGCCAGACAGTGTGGAAGGGCTGCTGAATGCTCTCAGGTTCACTACAAAGCACTTGAATGATGAATCGACTTCCAAACAGATTCGAGCGATGCTTCAGTAGAACCCTGCTCAGAGAGGAGGATCTGTGCTGACCTCAGATGTATATGTTTACATAAT	316	352
NM_001115026.1	Rattus norvegicus spermatogenesis and centriole associated 1 (Spatc1), mRNA	1582	CT	CA	CTGGCCCAGGCTCACTTCGCCCTGCAGGCCATTATGCATGGCCA	44	80
NM_001037206.1	Rattus norvegicus biphenyl hydrolase like (Bphl), mRNA	1212	GA	TT	GAAAATAGCAAACCCAAATCAGGTTGTAGCTTCAATAGCTGCAAAAAACATGAACATTAGCATTT	65	101
NM_001107979.1	Rattus norvegicus four and a half LIM domains 3 (Fhl3), mRNA	1067				0	-
NM_001013210.1	Rattus norvegicus FKBP prolyl isomerase 14 (Fkbp14), mRNA	1370				0	-
NM_001031661.1	Rattus norvegicus beta-1,4-galactosyltransferase 7 (B4galt7), mRNA	1591	AA	TC	AAGAACAGCCTCATGAAGATGTAGTCAGAAGCCGCCACATGGCCAGTGCGTATGGCAGTTGCTATTAGGAGACTTAGAACGGCAGAAGGCAGAACACAAGCCCTGGGCAAAGGAGTGGCTGATACTAGCTGTAGCTGGTGCCACTGCGGAGGAACCAGGGCACCAGATCTCACTTTTCAAAAGAAACTAGAATGCTGGATTC	202	238
NM_001108162.1	Rattus norvegicus RAS-like, family 12 (Rasl12), mRNA	2446	CA	TT	CACGGACTGGCCAGCTGTACTT	22	58
NM_001106939.1	Rattus norvegicus P2Y receptor family member 10B (P2ry10b), mRNA	2874	GT	TA	GTCTCCTGGCTAACAGTGCAGCCCTGTGGGTTCTGTGCCGCTTCATCAGCAAGAAGAATAAAGCCATCATTTTCATGATCAACCTCTCAGTGGCAGACCTTGCTCATGTCCTGTCCTTACCTCTTCGGATTTACTATTATATCAATCATCACTGGCCATTCCAGAGGGCCCTTTGCCTGCTGTGCTTCTATCTGAAATATCTCAACATGTATGCCAGCATTTTTTTCTTGACCTGCATTAGCCTCCAGAGGTGCCTCTTTCTTCTCAAGCCATTCAGAGCCAGAAACTGGAAGCGGAGGTACGACGTAGGCATCAGTGCTGCTGTCTGGATCATTGTGGGGACTGCCTGTTTGCCACTTCCCATCCTAAGAAGTGCTGGCTTAGCTAATAACAGTGAAT…	564	600
NM_001108204.1	Rattus norvegicus DNA polymerase eta (Polh), mRNA	3179	TA	TT	TATCCTCTAAAGCAGTTTCTACAGAAGTGAATGTGGCTGGGAACAGTTCTTTAGCTTACAACTCGCAGGAGATGACCCAAAGGGCAGCTGAGGACCAAGTGCTGTGTGAGAAGTGTGACTCCCTGGTCCCAGTATGGGACATGCCAGAGCACCTGGACTACCATTTTGCACTGGAGTTGCAGAAGTCTTTTTTGCAGCCTTGTACTTCAAAACCCCAGGCTGTCCCCGTGTCTCCTCAGGGCAAAAGAAATCCCAAGAGTCCTTTGGCTTCCAGTAATAAACGCCTTAGGCCCCACGGCATGCAGACACTGGAATCATTTT	321	357
NM_001106075.1	Rattus norvegicus kelch-like family member 26 (Klhl26), mRNA	3820	GT	GT	GTGCCCATCTCCTATGTTCGCTGCAGAAAGCCATGTCCCCAGGTCTGGCCCACCCAGGGTGGGGTGGTGGGAAGTGCTATGACAGCATGAACCCCAGCAGCCTCCCAAGATGGCAGCCTGCTGTTTTGCTGT	132	168
NM_001012144.1	Rattus norvegicus trafficking from ER to golgi regulator (Tfg), mRNA	1922	CT	GT	CTCTCAGCCTGGAATGGCTCCAAGCCAACCTGGTGCTTACCAACCAAGACCAGGTTTTACACCATCTCCTGCAAGTACCATGGCCCCTCCTTCCACTGGGGCTAACCCTTATGCTCGTAACCGTCCTCCTTTTGGTCAGGGCTATACCCAACCTGGACCTGGTTATCGATAAGGAGGTTCAGCCACACTAATAATGATGGCTTATTGCCTCCTAAAAGACTATACAATACTATTTTGTTTCAATTTGTATTGTATTGAAGT	261	297
NM_001106331.1	Rattus norvegicus tRNA phosphotransferase 1 (Trpt1), mRNA	2882	CC	GG	CCAGCCAACCCTACCGTGTGAATTCCAGGCCAATAGGAGATAATGGTCTCAAAAACAGGGTAGACAAGTTGGGAGGAGAGATTTCTCAGTGGATAAAGCCCTTTCATGTGTGAAAATACAGAACCCTTCCAAATCTAATGCATCATAGTGTGCCTACAGCAAAATGGAAGGCAGAGATTGCAGGCCAGCCAGCCTGGAATACATAGTATCAGAACTCTTATCTCAAACAAGGTAGGGGCTGGAGAGATGGCTCGGAGG	258	294
NM_001108871.1	Rattus norvegicus potassium channel tetramerization domain containing 9 (Kctd9), mRNA	3106	CT	TC	CTGTTTCGGCTCTTGCTTTTATAAGTCAGCAGTTTCTGCATTTCCCACAGTTTTCCATGATGGTGCCATGCAGGAGTGGGCCGCACGGTGCTC	93	129
NM_001108444.1	Rattus norvegicus GRB2-associated binding protein 1 (Gab1), mRNA	4177	GG	TT	GGATAATGTATATATTGGTGTCAAGACCTAGTTCCCTGACTCATGTACACGTAGGTT	57	93
NM_001109506.1	Rattus norvegicus ELMO domain containing 2 (Elmod2), mRNA	4770	GA	TG	GAGGGTGGGAGTTTATTCTTGTGCTCATAACTGGGGACCAGCAGCTGCGTCCTCAGAATAGGTGCTCTACTCTAACCCAGGAAGGGCGGTGCTTCTGGGGAGGCTTTGTCATGTTCACATGTGAGTAGCCTCTCCACACAAGCAGCTG	148	184
NM_001013191.1	Rattus norvegicus core-binding factor subunit beta (Cbfb), mRNA	2927	TA	TT	TAGTGCAGGTTTTGAAAATTACTT	24	60
NM_001128190.1	Rattus norvegicus sorcin (Sri), mRNA	827	GC	TT	GCACCCTGGCGCTGGCGGAGGGTACTACCCAGGCGGGTGTGGAGGGGCTCCTGGGGGGCCTGTGTTCCCTGGACACACTCAGGACCCGCTCTATGGTTACTTTGCTGCTGTGGCTGGACAGGACGGACAAATTGATGCTGACGAGTTGCAGCGATGCCTAACTCAGTCTGGCATAGCGGGAGGATACAAACCTT	194	230
NM_001014263.1	Rattus norvegicus synaptophysin-like 1 (Sypl1), mRNA	965	GA	TA	GATAGTCGCAAACTGCCCATGATCGACTTTATTGTTACTCTTGTTGCTACTTTTTTGTGGTTGGTGAGTTCCTCGGCCTGGGCTAAAGCTCTTACAGATA	100	136
NM_001106618.2	Rattus norvegicus peroxisomal biogenesis factor 26 (Pex26), mRNA	3717	CC	AA	CCTTGTTTGGTAGGCCAGCACTGCAGCCATCAGCCAAAGGCAGCTTTTGAGCATTTGAGTTGTGGCTCACCCATGTGGACACATGCTGTAATTGTAAAACATACACACTGGATTTCAAAGACCAAGTACAAAAAAATAAAAA	142	178
NM_001109517.1	Rattus norvegicus zinc finger and BTB domain containing 32 (Zbtb32), mRNA	1756	AT	GA	ATGAACGAGTTGCAGAAGCCTCGGCCAGCTGGAGAGTCCGAGTTGAGGACAAGTAACCTGGTGAAGA	67	103
NM_001108399.1	Rattus norvegicus PBX homeobox 4 (Pbx4), mRNA	1384	CA	CT	CAGCTTCAACTCAGATGCGTCTGACTAAGGTTTTGGAACCTGGCTGAGTGCTGTGGATGTCTGGCCCTGGGTCCTGCTGATCACCTCAGAAGCCCTGGCTGTGGCTCTGCCCTTTCCAGGCCACTCACTTCCCTGCTTTGGCGCGATGTTCT	152	188
NM_001108325.1	Rattus norvegicus mediator complex subunit 15 (Med15), mRNA	3243				0	-
NM_001007148.2	Rattus norvegicus beta-transducin repeat containing E3 ubiquitin protein ligase (Btrc), mRNA	2334				0	-
NM_001107818.1	Rattus norvegicus NADPH dependent diflavin oxidoreductase 1 (Ndor1), mRNA	2338				0	-
NM_001134750.1	Rattus norvegicus PNKD metallo-beta-lactamase domain containing (Pnkd), transcript variant 1, mRNA	2902	GC	CC	GCTACCTCTGCACCGTGTAAATGCTTCTCTCGTGGCACCTATCACACTGTATTTTACTTGTTTACATGTTTGTCTCCCCTTCTAGACTGTGAATCC	96	132
NM_001108935.1	Rattus norvegicus ceramide transporter 1 (Cert1), mRNA	5336	AA	AA	AAGAAACGTTGCAATAGTAAAGCTGGGTACCCAACTAGCCATCTCCTGCTAGATCTCCTCGCTCGGCGTGTAACTATAAATACATGAGACTCACATGTATATGGCTATATTTTTATTTGCTTGCTCCTAGGAGTGAAAAAAA	142	178
NM_001109899.2	Rattus norvegicus ornithine decarboxylase antizyme 2 (Oaz2), transcript variant 1, mRNA	1828	CA	GG	CATTTTGTGTCTGGCCTGGTGTAAGCAGGTCTGACCTTGCTTTCTTTACAGCTTAGTGTTATTCAGGCATTTGG	74	110
NM_001108397.1	Rattus norvegicus SURP and G patch domain containing 2 (Sugp2), mRNA	4293				0	-
NM_001134789.1	Rattus norvegicus RNA polymerase II, I and III subunit H (Polr2h), mRNA	808	GA	TT	GAAACCAGCCTTGCCGCTTAGTCACTCGAGCCACGGACATTGGTCAAGCCTGTGCACGAGCTGTTTGCCTGTAGAAGTGATGGTGCTCTGTGTCCTCTGTGGTACATCTTCAGCTTCTCCGAATTCAGTGGAAAACCGACCAGTCTGTAAAAGGCCAAGTGGGAGAGCCTAGCACGAACCTGAAGTTGTATTATTATTATTTTTTT	206	242
NM_001106023.1	Rattus norvegicus endoplasmic reticulum lectin 1 (Erlec1), mRNA	1874	GA	AT	GATCTCCAT	9	45
NM_001108352.1	Rattus norvegicus cell division cycle 7 (Cdc7), mRNA	2917	CA	AC	CACAGCACTCGGAGGATTCCCTGTATAAAAGGGGCAGCGGCGGTGGTCGGAGACATCCCAGAGATCGAACTGCCAACCCAGAGGGCTGGGACTCGGTGCCTGATGACGCCTATGACCTGCTCGATAAACTTCTGGAC	137	173
NM_145673.2	Rattus norvegicus MAF bZIP transcription factor K (Mafk), mRNA	2670	GT	AC	GTCACTGGATGAGTGGTCTCCAGGGTAGGCAGGTGACCACTGACTGGCTTGCTGCCCGCTCCTGGCCTCTGGTGGTCCTCCTGGGTGGAGGCCCCATACTCTTGGCGGCCAGGGGAGACAGGGCTGTCAGTACCACTGGAGCACCTGCAGAGGACACCTGCCAGGAGGGGGCTGGGAAGGGTGTGAGCATGCCCCATGGCTTCGTGTCACTGAAATTTCATTGTCACAAC	230	266
NM_001108516.1	Rattus norvegicus double PHD fingers 2 (Dpf2), mRNA	2404	GA	GC	GATAAGCCCTATGCCTGTGACATTTGTGGAAAACGTTACAAGAACCGACCTGGCCTCAGTTACCACTATGCCCATTCCCACCTGGCTGAAGAGGAAGGAGAGGACAAAGAAGACTCCCAACCACCCACTCCTGTGTCCCAGAGGTCTGAGGAGCAGAAATCCAAGAAAGGACCTGATGGGTTGGCCCTGCCTAACAACTACTGTGACTTCTGCCTGGGAGACTCAAAAATCAACAAGAAGACAGGGCAGCCTGAGGAGCTGGTGTCCTGTTCTGACTGTGGCCGCTCAGGGCATCCGTCCTGCCTGCAGTTCACCCCTGTGATGATGGCAGCCGTGAAGACCTACCGCTGGCAGTGCATCGAGTGCAAGTGCTGCAACCTCTGCGGCACTTCAGAGAAC…	1149	1185
NM_001108783.1	Rattus norvegicus coiled-coil domain containing 12 (Ccdc12), mRNA	811	AC	TT	ACAAGAGGCTTGTGACTCTGACTGAGATGTCTTCTGAGTCCCACCTGTTCAGAACACTCATCCTGGGGGAGGATAGTCTCAGCAGGGATGGGGTTAGACTGGCTAGCACTTCTGGGTCTTGAGAACCGAGCCAACCCACTGAGTCTCAGCTTCTGTTGGCTGTGACCAGTTCATCTCCCAAGGGTGCCCACCCCCTGAGTGGGTCGAAGCTGAGATCTGTACATATGTATGTAAACGGAGCTTT	244	280
NM_001109343.1	Rattus norvegicus cystatin 13 (Cst13), mRNA	734				0	-
NM_001107795.1	Rattus norvegicus PHD finger protein 20 (Phf20), mRNA	4749				0	-
NM_001108778.1	Rattus norvegicus ribosomal RNA processing 9, U3 small nucleolar RNA binding protein (Rrp9), mRNA	1550	CA	AT	CAGCTTGATCCTCTCTGTGACATCCCCCTGGTTGGATTTATCAACAGCCTCAAGTTCTCCAGTGGTGGGGACTTCTTGGTGGCTGGAGTAGGACAGGAACACAGGCTGGGTCGATGGTGGAGGATCAAAGAGGCTCGGAACTCAGTCTGCATCATCCCGCTCCGAAGGGTCCCCGTGTCCCCTGTTGCTGGCTCCTGACACACCCTTAT	209	245
NM_001134992.1	Rattus norvegicus SAM and SH3 domain containing 3 (Sash3), mRNA	2575	CT	TC	CTTCCCCAGGGAGGCTTATGGCTGAGGGCCCTGCCAGGATTCTACGGGCTCAGATAGAGTGGATAAGGGACTGCCCAAAGATATATGCTGCCTTTTGGACCCTCTCCCTCTATCAGTGACTGACAGTATAGCCCCTTCTGGCACCTCCCTTTCTCCCACTATGGCCGCACAAGTGGGGCACCAAGGGACCTAGCCATGCCATGGGTTCACGGCCCCCAAAACCTTCTTACCCTCACACCACTGTCACACTGCTTCTAAGAAGGACACCAAGCCAGTC	277	313
NM_001107824.2	Rattus norvegicus DEAD-box helicase 31 (Ddx31), mRNA	2688	GG	GA	GGCCAGTGCTAAACAGATACCCACCTTTGGCCAGGCCCTGTGAGATTGCACTCATGGACAGCAAGCATCCTGTGTGTCAGCCTGGAGGAGTGTAGCTCCTGGCAAGCTTGCCAGA	115	151
NM_001108403.1	Rattus norvegicus NOP2/Sun RNA methyltransferase 2 (Nsun2), mRNA	4664	TT	TG	TTCCCCAGAATGAATTCTGGTAGAAGTGTGGGGTTTAGAGAAAGCATGGTGTTGGGCTCTAAGGAGGAGGGGCACACTTTGCTTACTTCCCTGTCCAGGGGAGGGAGACATTTTAGCAGTAGTGGGTCTCTCCTAACATAGGTGAGCCTGACCTTGAGAAGACCACTTAGTGAGAAGACCTCTAAGCTGTAGCCATTGGAAGTACCTCACTGCCGAGTAGCCTGGTGACAACCTCAGCCAGTGCTGCCCTGGATGCCTCCATCTTGTGAGTCCTTCTCTTACAGGATGTGGGTTCGTTACTTTGTAGAGTGTTCTCGGGCTCTTCCTTCTTACTAGAGCAGGTAGGCAGTGCAGCTAGGGCCGTGGCACTGTTGGTTGTCTGTCACCTTGTGGCAGCTT…	529	565
NM_001127575.1	Rattus norvegicus calmodulin-like 4 (Calml4), mRNA	896				0	-
NM_001109407.1	Rattus norvegicus DEAQ box RNA-dependent ATPase 1 (Dqx1), mRNA	2606	GA	GA	GACACCGATGGGACAGGAAATTACTTGCTTCTCACCCATAAACATGTGGCCCAGCTGTCACCATACTGCGTCTACCGTAACCGCAGGACTCCAGCCCAGCCACCCACATGGGTGCTGTACCACCGCTTCTCCATCTCTAAAGACAACTGCCTTTGTACAGTCTCTGAGATTCAGCCTGAGATGCTGGTGGAGCTTGCCCCTCCATACTTCCTGAGTAACCTGCCCCCCAGTGAGAGCAGAGACCTCCTGAACCAGCTGAGAGAAGGAACAGAGCCATCAGCAGCAGTGACTGAAACTGCTTCTCCTCAGGAATATGGAGATGGCTGTGTTCTGCAGTGAGCTGCCTAAGGAACCTCACCACACAGTGGACTTAGAGACCCAAAGTGTAGGGTCAGACAC…	569	605
NM_001004281.1	Rattus norvegicus TBC1 domain family, member 20 (Tbc1d20), mRNA	1391	AA	GA	AAAGAGGGTGCAATTGCTGTGA	22	58
NM_001109516.1	Rattus norvegicus nudix hydrolase 16 like 2 (Nudt16l2), mRNA	816				0	-
NM_001013085.1	Rattus norvegicus sorting nexin 10 (Snx10), mRNA	1423	CT	GG	CTCTGCAGGAGTCCTGAGAAGGAACTCTAGGGCTACCACCTTAGGAACGAAAATTGTGCCCAGCCAGAAAGAACGCTTGCTCATAATAGATTCTTACCTAACGCCACTGTCAGTATCCTAGGTGG	125	161
NM_001108883.1	Rattus norvegicus SUV39H2 histone lysine methyltransferase (Suv39h2), mRNA	4132	GC	TC	GCCAATGGGACAGAGACAGTTCCTCAGAGGAGGTTGTTTCCCCAGGTAACCCCAGACTGTCAAGTATAAGGTACATGCAACCATTTTGCATTTGACTGACATCTC	105	141
NM_001024321.1	Rattus norvegicus hyaluronoglucosaminidase 5 (Hyal5), mRNA	2122	AG	AA	AGACTCTAGCTAGGCCATGGTTCACATGAACGTAGGAGGAGTATCTTTTACTATAATGAAAGGGCAGGTGGTGAGGAGTTCTGCATAAGGTCCTTTCCAGCAAGTTATAGATTATACAACTTGTCACAAAGCATCCCTGAAAAATGAAGCAAGACGAATAATAGTTCAATGAAGAGCAGCCATCCCACTTTCATCTCCCACAGTGACCTCATATCAGTATCTTTCTCATCTTTTGCACTAGATATTTGAGAGATCAAAGTGAATAAGAAGTAATAAGTGCTTGGATACTAA	291	327
NM_001109253.1	Rattus norvegicus C-type lectin domain family 1, member A (Clec1a), mRNA	3299	CA	AA	CATTTCTGCAGGAATCAGGATGCAGGCCAAATACAGCAGCACAAGGGACATGCTCGATGACGATGACACCACCATAAGCCTGTATTCTGGAACATCCACTGTCACCAGACGAGCAGAGCCCAGGCACTCAGAGAATGGGACACCCTCTTCAGTTTGGCGCCCAGTGGCCCTGACCCTGCTGACCTTGTGTTTGGTGTTGCTCGTTGGCCTGGCAGCCCTGGGCCTTGTGTTTTTTCAGTTCTACCAGCTCTCCAATACCCAGCAGGACAGCATCACTGAAAAGGATGAAAGGCTGGGGAACATGTCCCGACAACTACAGTCCCTCCAGACCCAGAACAGAAAACTCACTGAAACTCTGCAGCAGGTAGCCGTAAAACTGTGTCGTGAACTTTACAACAA…	1398	1434
NM_001108639.1	Rattus norvegicus sulfatase modifying factor 1 (Sumf1), mRNA	2478	GA	AT	GAGGCGAATGCCCAGGGCCTGACCTCGGGCCCACGATCGCTCGCTCTCACTAAGATGGTCCCCATCCCTGCTGGAGTATTTACAATGGGCACTGATGATCCTCAGATCAAGCAGGATGGAGAAGCCCCTGCCAGGAGAGTCACTGTCGATGCCTTTTACATGGATGCCTATGAAGTCAGCAACGCTGATTTTGAGAAGTTCGTGAACTCAACTGGCTAT	219	255
NM_001106179.1	Rattus norvegicus transmembrane protein 208 (Tmem208), mRNA	798	GC	GG	GCCCTTTACCTCTTGTGGGTAAACGTGCTGGGCCCCTGGTTCGCAGCAGACAGTGGAGCCCCAGCACCAGAGCTCAATGAAAAACGACAACGCCGACAGGAACGGCGCCAGATGAAAAGGTTATAGCGTCTCTACTGTGGCTGTAGGCTGCTGGGTGCTGGTTGGCTCTATTAGGATGTATGGCCCCATGCCTGGAGCAGTGAGGGCCTAGG	212	248
NM_001039011.1	Rattus norvegicus connector enhancer of kinase suppressor of Ras 1 (Cnksr1), mRNA	2512				0	-
NM_001077585.1	Rattus norvegicus canopy FGF signaling regulator 2 (Cnpy2), mRNA	1028				0	-
NM_001134908.1	Rattus norvegicus zinc finger protein 637 (Zfp637), mRNA	1149	CT	GC	CTTTGTCTGTCTGCGGGCGCGCGCCGCTGCGGTACTCCAGCCCAGCCCATGGAAGCATCATACGAAGAGGCGGTGACCAAAGTCATCGAGCAGGAGCGGACATGTTTGGGTTTCCGACAGCCACTCTGCTGGACTGTCATGGAAGATACGCGCAGAATGTAGCATTTTTCAATGTGATGACAGAAGCCCACAAGTATGATTCTTCAGAGGCCACAGGATCCTCAAGCTGGGATTTCCAGAGTTCTTTCAGAAGAGAGAAGCTGGAACAAAAGTCCCCAGATTCTAAGGCACTCCAGGAAGACTCACCTGGAGTGAGACAGAAGGTCTATGATTGCCAGGAGTGTGGGAAGTCTTTCCGTCAGAAAGGTAGTCTAACATTGCACGAGAGAATCCACACTG…	707	743
NM_001107793.1	Rattus norvegicus acyl-CoA synthetase short-chain family member 2 (Acss2), mRNA	2867	AA	CC	AAGATTGCTCAGAATGACCACGACCTGGGGGATACCTCTACAGTGGCTGACCCATCTGTCATCAACCATCTCTTCAGTCACCGCTGCCTGACCACACAGTGAACAAGACTCTTATCCAGGATTTCCCTGTGCTTGGCTCTCCAAATTTCTGCCCATCTATCCTGTCCCTCACCCAAGAGTACCAAGGGCCAGTGCTAGTTGACATTTAGGTTGAAACTAGGGAGACAGTTACTTAGACTGCCAGGTCGAAGGGAACAGGGCTCAGGTCAACCATGCACTGATACTCTCCTAGGCTACAGAGATCTCCAAGCCCAGAACAGAGACTTGAACACCATGTCC	339	375
NM_001108585.1	Rattus norvegicus similar to human chromosome 11 open reading frame 91 (C3h11orf91), mRNA	815				0	-
NM_001109672.1	Rattus norvegicus cyclin K (Ccnk), mRNA	2552	CC	TT	CCCCTGTGCACCAGCCCCCACCACTGCCACATCGGCCTCCACCCCCGCCGCCCTCCAGCTACATGACTGGGATGTCTACCACCAGCTCCTACATGTCAGGAGAGGGCTACCAGAGCCTGCAGTCCATGATGAAAACAGAGGGGCCCTCCTATGGCGCCCTTCCCCCAGCCTATGGCCCACCTGCTCACCTAACATACCATCCCCATGTCTACCCCCCCAACCCACCTCCACCTCCTGTTCCTCCACCCCCAGCCTCCTTCCCTCCACCAACCATCCCTCCCCCTACCCCAGGCTACCCTCCACCTCCCCCTACCTACAACCCCAATTTTCCACCCCCGCCCCCACGCCTTCCTCCAACTCATGCAGTCCCTCCTCACCCTCCTCCAGGCTTGGGTTTGC…	548	584
NM_001130583.1	Rattus norvegicus parvin, gamma (Parvg), mRNA	2536	AA	AT	AATCCACAGTCACCTCCTAGGCTCTTGGTTCCCTCCCTCCTTCCCTGCTTGCTTGTCCCCGTGGCCCCTTCATGTCCTCACCTCCACCTCCTCACCTCCTGTCTGATAGGAGATTTGGACATAAGGAAAATCATTTTTGTAACTTTGTTGAGGAATAAATAACATTTCCCCAT	173	209
NM_001108864.1	Rattus norvegicus ankyrin repeat and SOCS box-containing 3 (Asb3), mRNA	2232	GC	AG	GCTTGTGACTCTGGACCAGACAAAGTGAGCCCTGTTTACTCTGCAGTGTTTGGAGGACGGGAAGAGTGCCTAGAAACGTTACTCCAGAACGGCTATAGTCCAGACGCACAAATGTGCTTGGTGTTTGGATTCAGTTCCCCTCTCTGCATGGCTTTGCAAAAGGACTGTGAGTTCTCTGGAGTTGTGAATATTCTTTTGAAGTATGGAGCCCAG	213	249
NM_001135020.1	Rattus norvegicus Sec61 translocon subunit gamma (Sec61g), mRNA	443	TT	GG	TTCCGTTGGGCTCAATTCTCTCCTAGGCTACGTGTCTCTGCCCTCTCAAACCGCCATCCCACAAACATGGATCAGGTAATGCAGTTTGTCGAGCCAAGTCGGCAGTTTGTAAAGGACTCGATTCGGCTGG	130	166
NM_001005906.1	Rattus norvegicus chondroitin polymerizing factor (Chpf), mRNA	2946	GG	GC	GGCTCTTGTCCTGGGGGCTGGGCTGTAGATGAGTTGTTGGAGAAGGTGAGAGCTGAGAAAGGAGGGTTACGGGATCTACTGCCTTCTCCCTTCTGGATCCACGGTGAAGCCCTGGC	116	152
NM_001008323.1	Rattus norvegicus phosphomannomutase 1 (Pmm1), mRNA	1220	AC	CA	ACAGTCGGCCACAGCGTGGTCTCCCCTCAGGACACTGTACAACGATGCCGAGAGCTTTTCTTCCCAGAGACAGCGCATGAGGCATGACGGTGCCCACAGCTGAGCATTGGACCTTCAAAGAGCTCTGACCAGGCCTGAAGACAGAACCATGGGATGCCACGGTTCCCCTCCCACTGGCCCAACGCCTAGCATCCTGAGGGGCACTGCAGGTCACCTACACAGGACCAGGTCTGTGGGAACCGTCCCCAGCCAGGTGGCTCCTGACGAGACGCATCCCTGCACTCTACCCTGATGGCCCTGGCCTCTGACGCTGCTGGTTTTGGGGACAGAATAGGTTTTACCACAGGGTGGCATGGGACTTATACTCTGGAGCCTGCTAGCCACAGACTGATAAGGGGT…	445	481
NM_001107812.2	Rattus norvegicus methionyl aminopeptidase type 1D (mitochondrial) (Metap1d), mRNA; nuclear gene for mitochondrial product	1358	AA	AT	AAT	3	39
NM_001134593.1	Rattus norvegicus circadian associated repressor of transcription (Ciart), mRNA	1418	GC	TT	GCACTCCAATCCCACCAACTACACTGTCTCCTGTCCTCCCTGGTGATCTGAGGAAACTGTCGGGAGAGGAGCCTCGCTGCCACAGTTTGCCAGTAACGCTGCCATCAGACTGGAGGTGCATCCTTTGTCCCCCTGTCCTACCTACCGCAGATCGAGAGGTGACTACAGGACACCAGAGCCACAGATGATGAACCATCCTCCAGTTGCTCAGACCCTCAGCCCTAACCCAGGCTCTGCAACTTCCCCTGGATCCCAACCTGTATAAATATGTTTGTATAAATATGTTTGTGTGTATTTTTTTTTTTTTTACTT	312	348
NM_001014262.1	Rattus norvegicus WD repeat containing, antisense to TP73 (Wrap73), mRNA	1578	GG	AT	GGAAGGTGACTTTCCAGTGCTTGGACTGTGCTGGCAT	37	73
NM_001128193.2	Rattus norvegicus VPS37D subunit of ESCRT-I (Vps37d), mRNA	1560				0	-
NM_001108477.1	Rattus norvegicus heterogeneous nuclear ribonucleoprotein U-like 1 (Hnrnpul1), mRNA	3746	AC	TA	ACTTTAGCAAACTGCACTTA	20	56
NM_212490.2	Rattus norvegicus ATPase H+ transporting V1 subunit G2 (Atp6v1g2), mRNA	1465				0	-
NM_001170456.1	Rattus norvegicus divergent protein kinase domain 1A (Dipk1a), mRNA	2275	GA	AT	GAAGAACTAGAAAAGCAGCTTTATTCTTGTATTGCTCTCAAGATCACAGCAAATCAAATGGAAATGGAACACTCTTTGATACTAAATAACCTGAAGACATTATTGTGGAAGAAAATTTCCTACACAAATGACTCCTAGTAAAATTTGGACTATTACCACTATTGAGAATCTACTTATGTTTGAGCAT	187	223
NM_001107974.1	Rattus norvegicus zinc metallopeptidase STE24 (Zmpste24), mRNA	2196	AG	AC	AGGGGAAAC	9	45
NM_001106944.1	Rattus norvegicus glycerophosphodiester phosphodiesterase domain containing 2 (Gdpd2), mRNA	2500	AT	AC	ATGAAGACCGTGCTACTGTGCAACAACGGGCTCCCAGAATGCGCCAGATATATGGATATCGGGGTAGCAACGGGACTGAGAGGCCCCAGTTTCTCAACCTCCCCTACCAAGACCTGCCTGTGTTGGATATCAAGGCACTGCACCAGGATAATGTCTCTGTGAACCTGTTTGTTGTGAACAAACCCTGGCTCTTCTCCCTGCTCTGGTGTGCAGGGGTAGATTCCGTCACCACCAATGACTGCCAACTGCTGCAGCAGATGCAGTACCCGCTCTGGCTTATTCCCCCTCAGAAGTAC	296	332
NM_001024335.1	Rattus norvegicus CD27 molecule (Cd27), mRNA	1602	TG	AT	TGTATGGGGGAGACTCAGGCTCTAGCTGTAAAACAGCTTCTAAATGAAGCCTTCCAGCTGGCAAAGCTACTTGCTGGGGGGCAGTGAGCAGCACAGAGTGTTGTTCTTCCAGAGGACCAGAGTTTGATTCCCAGCACTGTCAGATGGACCAAAACCAGCCGTAACTTTAGATTCAGAGGATCTGACACCTTTGACCTCCTCCAGCACACACGCACACACTGGACACACACACACTGGACACACACACAACACACACACACACTGGACACACACACACTGGACACACACACACTGGACACACACACTGGACACACACACTGGACACACACACACACACTGGACACACACACACACTGGACACACACACACACTGGACACACACACACTGGACACACACAC…	420	456
NM_001107938.1	Rattus norvegicus RNA polymerase I subunit E (Polr1e), mRNA	1588	CC	AA	CCCAGACCTCAGACCGACAGTCGAAGCGGAAAAAAATGAGCTAGACGTTTTCCACAGCTACTTCTCTTCACTTCATTCTTACTTTTTTATTTTTTGAAAAAGAAAGTAGACTGGACCTTGTGGTACATACCTAGAAGCCAAGAACTCAGGAGACTGAGGCAGGAGGATTATGAATTCTGGGCCTGTCTGGGATGCTGCCACGCTCCACCACACCTGCAAGGCCTTACTTTAGCATGGTTACCATGCCGAAAGCCAGCATTCCAGTTATCAGAAA	274	310
NM_001025726.1	Rattus norvegicus SRSF protein kinase 1 (Srpk1), mRNA	2374	CC	TT	CCCTCCCCTCTGAGGCTTCCCTCTCTTTTTTCCAGGGCAAAGCTCTTTCTTTCAAGGGTTTCTATTTTTT	70	106
NM_001108134.2	Rattus norvegicus pseudouridine synthase 3 (Pus3), mRNA	1718	AT	AA	ATCCAGCATTTTGTACGAAGAGGACGAATTGAGCACCCACATTTACTCCATAAGGAAGAAAAAAAAGCAAAGAGGGACTGTGCTGACAAAGAAGAAAATATTGTTTTAGAGAATCCAACGAAGAGGGTTTGTATAATAGATGCAGAAA	148	184
NM_001109153.1	Rattus norvegicus RGD1559600 (RGD1559600), mRNA	583				0	-
NM_001106437.1	Rattus norvegicus FH2 domain containing 1 (Fhdc1), mRNA	4119	GA	TC	GACTGGCTGCTGGGGGGAGGACACAGAGGCCAGTC	35	71
NM_001100730.1	Rattus norvegicus nipsnap homolog 1 (Nipsnap1), mRNA	1909	CT	TT	CTGGCAGAGTTTTTCTCTCAACTCTGGAAGACTTCTGATGGGTGGTGTTTGGCTTAGAAAAAGATGACGTTTTTTGAGAACTTAGTCTGTCTATCCCCATCCAACCTCTCTCCCATGCTGGATGAAGTTT	130	166
NM_001106144.2	Rattus norvegicus membrane integral NOTCH2 associated receptor 2 (Minar2), mRNA	1988				0	-
NM_001025695.1	Rattus norvegicus COP9 signalosome subunit 5 (Cops5), mRNA	1296	AA	GC	AATTGATGTTAGTACACAGATGC	23	59
NM_001037214.1	Rattus norvegicus cell division cycle associated 4 (Cdca4), mRNA	2325	GC	CT	GCATGTGTGTGCTTAGAAAGGGTGTGCAGCCCACCATGTGCTCAATAGGAGTACCTGTGCTTGCTTGCT	69	105
NM_001127578.1	Rattus norvegicus family with sequence similarity 91, member A1 (Fam91a1), mRNA	4455	AA	CC	AAAGTTTGTCAGAAAATAGCTACACATGGCCTGTGCAGTAAAGAGAGCCTTCAAAGTCTCTTACATTCCAGTAGAAAACTCTCTCTGCAAGTCC	94	130
NM_001107543.2	Rattus norvegicus ubiquilin 3 (Ubqln3), mRNA	2195				0	-
NM_001007001.1	Rattus norvegicus intraflagellar transport 74 (Ift74), mRNA	2133	AA	AA	AACTGACTCTCGGTTAGGCTCCTCAGAAAGAAGTTCCTGTCGTAGAGTCCTAGTGGCGTCCCATTCGCACCAAGCAAGTGGTTGAAGTGAACAATGGCCAGTAATCACAAATCTGCAGCACCTCGCCCTATTTCTCGGGGTGGAATAGGACTAACAGGAAGGCCTCCTTCTGGAATAAGACCCCCATCTGGGACTGTTCGAGTGGCCACTGCAATGCCACCAGCAACAGCAAGACCAGGTTCCCGTGGTGGTCCCCTAGGGACTGGCGGAGTTTTGTCATCTCAAATCAAAGTTGCTGATCGTCCTGTAACCCAGCAAGGTTTGAGTGGAATGAAGACTGGCATGAAAGGTCCCCAGAGGCAAATTTTAGACAAATCTTACTATCTTGGACTTCTTAGG…	427	463
NM_001025148.1	Rattus norvegicus polypeptide N-acetylgalactosaminyltransferase-like 5 (Galntl5), mRNA	1568	TC	TT	TCGCCTGCAATGTCAGGAGGAATCTTTGCTATAAACAGACATTATT	46	82
NM_001108947.1	Rattus norvegicus solute carrier family 25, member 44 (Slc25a44), mRNA	3678	GG	TT	GGCTATGTGGCCTCACTGCTAACGTATATCCCAAACAGCGCGGTTTGGTGGCCCTTTTACCACTTCTATGCAGAGCAGCTGTCGCGCCTGTGCCCTCAGGAGTGCCCTCACATTGTCTTTCAAGCCATCTCTGGGCCCCTGGCTGCAGCCACTGCCTCCGTCCTCACCAATCCCATGGATGTCATCAGAACCCGTGTGCAGGTTGAAGGCAAGAGCTCCATCATCCTGACCTTCAGACAGCTGATGGCGGAAGAGGGGCCTTGGGGCCTCATGAAGGGCCTCTCAGCCCGAATCATCTCGGCTACACCCTCCACCATCGTCATCGTGGTGGGCTACGAGAGCCTCAAGAAACTCAGCCTGCGACCCGAGCTGGTGGACTCAAGACACTGGTAGCAAGCG…	923	959
NM_001134708.1	Rattus norvegicus outer dense fiber of sperm tails 2-like (Odf2l), mRNA	2396	TT	GG	TTTTCTCAGTCTGTCAAGGTAGTACACGATCGCCTACAGCTCCAAATTCAGAAGAGGGAGGTGGAGAATGAAAGG	75	111
NM_001034999.1	Rattus norvegicus nicolin 1, tubulin polyglutamylase complex subunit (Nicn1), mRNA	2170	CC	TC	CCTGTTTGTCATCAGACTCAGCATGAAGCACTTCCGTGTTCCTCTTCCCTTCTCTCAGTTGCTTCTGCCCATCCTGCCCAGAGTGACGAGAAAGCAACCCTGGGGGAGTGCGTCCAAACAAACGTCTCACTGATATTCACTGAGGCTGAGGCTCTCCATTACCCCAGAGCAACCACTAAATGAAGACGACTGCTGCTCTTTCCCGTGATCAAACCGCTTCCCTCTAGTTCTTCCTGGGAACTATTC	246	282
NM_001007713.1	Rattus norvegicus transmembrane BAX inhibitor motif containing 1 (Tmbim1), mRNA	2099	TG	TT	TGAACACAGGAGCTCTGAGGTGAAGAGGGTCCTCTCCCACCTCGGCCACAGGGTTCTAGGCTAGGAGCTGGAGCTGTTTCCCTCCTGGATCCAATAAAGCCAGATGCTTCACCTCTAGCTCCAGTGCTCATAGGCCACTTATGCTGTCTGAACTCTTTAGGCTTGGCATCTCTTAGCTTTAGAAGCTAGAAGAGATCTGTGCCCTGGGGTCTCTCTGTTCCAACCCCATCTTCCAGTAACACGTATCCATTATTTATCTGGGCTAGGGGAAAAGACAGTGAGCAAAGACAGTATGGGGGGAGAGTAGCACAGAATGGTGTCCCCCTGACTGGCACCCATCTTGGCTACCATCCAGGTCCAAAGTGCTTGAGGCCTTCTGAGGCTT	385	421
NM_001134556.1	Rattus norvegicus small nuclear ribonucleoprotein U5 subunit 40 (Snrnp40), mRNA	1550	CC	CT	CCATTTGCTCCCAAAGAGAGATGTGTGAAGATATTTCAAGGAAATGTCCACAACTTTGAAAAGAACCTCCTGAGGTGTTCCTGGTCACCAGACGGAAGCAAGATAGCAGCTGGCTCAGCAGACAGGTTTGTGTACGTGTGGGACACCACAAGCAGAAGGATCCTGTATAAGCTTCCTGGTCATGCTGGCTCCATCAATGAGGTGGCCTTCCATCCCGATGAGCCCATCATCCTCTCAGCATCCAGTGACAAGAGGCTGTACATGGGTGAGATCCAGTGAAAATGTGGAATGGAAGGCCCCGTGACCCGAGGCTCAGACTACGCCATTGGCCAGAGTCAGATGGTGTCTGGGCTGACCTGCCTTCAGATGACCATCGTTAGCAAGCAGCTGGACCTGATG…	490	526
NM_001127637.1	Rattus norvegicus sorting nexin 9 (Snx9), mRNA	2371	AT	AC	ATCTACGATTACAACAGCGTCATCCGCCTCTACCTGGAGCAGCAAGTGCAATTCTATGAAACAATCGCAGAAAAGCTGAGGCAGGCCCTCGGCCGCTTCCCAGTTATGTAGACCAGAACGGACACAAGAGAACTCCGAAGTGCTTCTTTTTGACCTGGGACAATGCAATTCAGTTTTCTCCCCACCCCATCATAAGAGAGAGAGAGAGAGAAGGAAGAAAACCAAAAAGACAGAAGTTGATAAAACTCGTTTTCGTCATTAGCCAGCCTAAAGGCGTTGTTGCTTAGGATGGCCTTCCTTGTTCATTTCGACATATTAGTTACCCAATGGAAATGTCTATTTTTGAAAAATAC	353	389
NM_001127655.1	Rattus norvegicus cytochrome c oxidase assembly factor 4 homolog (Coa4), mRNA	1388	TG	CC	TGCCAGCCACAGGTTCAGGCTTTCAGGGATTGCATGAGTGCACAGCAGGCAAGACGGCGGGAGGAGCTGCAGAGAAGGAAAGAGCAAGCCAGCGCTCAACACTGAGACC	109	145
NM_001044291.1	Rattus norvegicus U2 small nuclear RNA auxiliary factor 1 (U2af1), mRNA	935	GA	TT	GAGAGATCTGGGCGATTCTGAGCCGAGCCGTTTTTACCATGTGCTAGACAGTGTTGTAGTTGGTTGGCAAGCCAGTTCATAGTGGGATTTTTTTT	95	131
NM_001024288.1	Rattus norvegicus testis expressed 36 (Tex36), mRNA	839	CG	TT	CGTTTTCCAAGATGTTACGATGAGAGATGGATTGCTTCCACCCAAAGCTGTCCAAAGTTTCTGGGGAACCAGCCAAATGGAGAGTTTGCTGTTGACACAAAGGTGGTCTCTCCACACCCTCGCACAGGTACCCCAAGCCTTCCAGAGGCTCTTGATGAGGCTCATGATGTCATCCCAGCAGGCGTTCATGAAGTCTCTGATCCAACACCACCCCCTAATTGCTGAAATGCTTTTGTGACTT	241	277
NM_001135894.1	Rattus norvegicus WD repeat domain 25 (Wdr25), mRNA	1895				0	-
NM_001108546.1	Rattus norvegicus YTH N6-methyladenosine RNA binding protein F3 (Ythdf3), mRNA	4150	CT	AA	CTTCAACCAGAACAATGGAACAGGCAGTGAAAACTTTGGTTTAGGTGTTGTACCTGTTAGTGCTTCACCTTCTAGTGTAGAGGTGCATCCAGTGCTGGAAAAACTAAAGGCCATAAACAATTATAATCCCAAAGACTTTGATTGGAACCTGAAGAATGGACGTGTGTTTATAA	173	209
NM_001173388.1	Rattus norvegicus catenin, beta-interacting protein 1 (Ctnnbip1), mRNA	2565	TG	AA	TGAGGAAGAAAGATGCAAGTGTCGCTCTGGCTTCTTATTCCAACTGAAAGTCTTATCTAATGGAGGAAAAA	71	107
NM_001109316.1	Rattus norvegicus retinoic acid induced 2 (Rai2), mRNA	2564	CC	AG	CCAAGTCTCGTGAGGCCTCAGCCATGATGGATAGTCACAGCAGCAGCAGCAATGGCACCGAGATGGTCAGCCAGCCCATCCACCCTGGCAGTGAG	95	131
NM_001107714.1	Rattus norvegicus DENN domain containing 2D (Dennd2d), mRNA	1926	TG	AG	TGGTCCCTGAGAGCCTTCTGGCCACTGTCTGCTGCCCTACCCCCTTCATGGTTGGGGTACAGATGCGATTCCAGCAGGAGGTTATGGACAGTCCCATGGAAGAGGTCCTGTTGGTGAATCTTTGTAAAGGAACCTTCTTATTATCAGTTGGTGATGAGAAAGACATCCTACCACGGAAACTTCAGGATGACATCTTGGACTCTCTTGCTCAAGGAATAAATGAG	224	260
NM_001107096.1	Rattus norvegicus centrosomal protein 97 (Cep97), mRNA	2817	AA	AG	AAAGGTTGGGTGCCTCTGACAGTGAGGCTCATAGAGCATCTCCTACTTTACAGGAGGAAATTAGCCAGACACCAGAGAATTGTAAG	86	122
NM_001100895.1	Rattus norvegicus activating transcription factor 1 (Atf1), mRNA	2337	CG	CT	CGGAAGAAGAAGGAGTATGTGAAGTGCCTGGAGAACCGAGTTGCTGTTCTGGAAAACCAAAATAAAACCCTAATAGAGGAGCTAAAGACTCTGAAGGACCTTTATTCTCATAAAAGTGTTTGATTCT	127	163
NM_001109227.1	Rattus norvegicus tetraspanin 33 (Tspan33), mRNA	1983	GG	TG	GGGCAGCAGTGGACCATGGCGCGGAGACCTGGCGTGCCCGCTGCCTACGGGGAGGAGTTCTCCTTCGTCAGCCCGCTGGTGAAATACCTGCTCTTCTTCTTCAACATGCTCTTCTGGGTAATTTCCATGGTCATGGTGGCTGTGGGTGTCTATGCCAGGCTGATGAAGCACGCAGAAGCAGCCTTGGCTTGTCTGGCGGTGGACCCTGCTATCCTGCTGATCGTGGTGGGCGTTCTCATGTTCCTTCTCACCTTCTGCGGCTGTATCGGATCCCTTCGGGAGAACATCTGCCTTCTGCAGACTTTCTCCCTCTGCCTCACCATCGTGTTCCTGCTGCAGCTGGCTGCTGGCATCCTGGGCTTCGTTTTCTCAGACAAGGCTCGGGGGAAAGTGAGTGAG…	1222	1258
NM_001107946.1	Rattus norvegicus hook microtubule-tethering protein 1 (Hook1), mRNA	5475	GC	AT	GCCTGGCCGCCGAGCTCCAGTGGCGGGCGCGGAGGTCGTTGACGCGGGCTCGGGTGGAGGCGCGTCCGTCGCTGTGAGCGCGGCGTCGAGGTTCTCGGACCATGGAGGACCCGCAGCCGCTGCCACAGCCTGAGCTGCCGCTGTGTGACAGCCTCATCATCTGGCTGCAGACAT	174	210
NM_001106009.1	Rattus norvegicus LIM domain binding 2 (Ldb2), mRNA	1937	CA	AT	CAGCAAGAAGAAGACCACAGCCGCGAGCCTGAGCCTGTCCACTCAGGTACCTGATGTGATGGTGGTAGGAGAGCCAACTCTGATGGGAGGTGAGTTTGGGGACGAGGACGAAAGGCTAATCACTAGATTAGAAAACACGCAGTATGATGCGGCCAACGGCATGGACGACGAGGAAGACTTCAACAATTCACCTGCCCTGGGGAACAACAGCCCGTGGAACAGTAAACCTCCCGCCACGCAAGAGACCAAATCAGAAAACCCCCCACCCCAGGCTTCCCAGTAAGATGGGCTACTGGCTCCTGATTTCGCTGTCCATAGGCCCCGTGGGGTAGAATTCCAGTCGCAAATCTCTACTATCAGGAGAGAAAAGAGATGAAAT	379	415
NM_001108933.1	Rattus norvegicus dermatan sulfate epimerase (Dse), mRNA	4130	TT	TG	TTGCTATTAGAAGAGACAAAAATGCCTGTTTTTTTGACATATTTCTG	47	83
NM_001109338.1	Rattus norvegicus solute carrier family 35, member F1 (Slc35f1), mRNA	4798	GT	TA	GTAGACCAAGAAATGGACAACTTCACGCCACTGTGTCCCATGAAAATATTTCAATGTTTAGTTTAGGTATTGCTAACTTGTGCTA	85	121
NM_001107948.1	Rattus norvegicus autophagy related 4C, cysteine peptidase (Atg4c), mRNA	2331	AT	TT	ATTTGCAAGGGCTAACAATTTATGTTGCCCAGGACTGTACAGTTTACAATTCTGATGTAATTGATAAGCAGACTGATTCTGTGACGGCTGGAGATGCTCGTGACAAGGCTGTTATTATTTTAGTTCCTGTTAGGCTTGGTGGAGAAAGAACCAACATTGACTATCTGGAGTTTGTGAAGGGTGTT	185	221
NM_001025736.1	Rattus norvegicus G protein nucleolar 2 (Gnl2), mRNA	2328	AT	AC	ATCCCTTTCTTTGTCAAGCCTCCCAACGCAGAGATGCCGACCACTCCCCAGCTCCCACCCTCCTCACCATTGGAAGTTACCACAGAAACAACGCAGAACAACCCAGAAGAGGAGACCATAGAAACAGAAGTCGAAAGGTCAGACTCTGTCATTGAAAAGGAGCCAGAAGCAGGCTGTTCCCAGGATGAAAACTCAGAGATGCAACAGATCCTCGCACGGGTTCGCCAGAACTTTGGTAAAATCAATGTAGGGCCTCAGTTCTCTGCGGACGACCTGGTGCCCGTGGACGACCTGGTGCCCGTGGACTTGTCAGACCTGGAAGATCTGGAAAGCTCTGAGGAGGAGGAGGAGCAGGAGCAGGAGCAGCCAGGAGAGGATGCTGAGGAAGAGTGTTCCCGA…	534	570
NM_001109089.1	Rattus norvegicus Myb/SANT DNA binding domain containing 1 (Msantd1), mRNA	1185	GG	CC	GGCCCTCCACGTCCCAGACCGAGGCGTCCCTGTCGCCGTCTGCTAAGTCCACCCCTCTGTACTTACCGTATACCCAGTGCTCCTATGAAGGCCGCTTCGAGGACGATCGCTCCGACAGCTCCTCCAGCTTACTGTCCC	138	174
NM_001108197.1	Rattus norvegicus TATA-box binding protein associated factor 8 (Taf8), mRNA	2765	TG	TT	TGCTTCTAGTGAGCACGTCTGTAATTCCTTCACTATTCTCGTGTCGGGGGGCCAATGCCTGTTGAGAATATTGGGGGAGGAGGGGGGTTCTTATCTGAGGCCTCAGAACTGCGTGCTGTCTTTCTTCCTCTAGGAAGAGAGATGCTGGGACGTGGGCCTGAGTGGTGATGTGCTGAAGCATATAACTCTCATTGTGTGTACATTTATAGATTTCTATTTTTTATAATTGGGGGTCTTATTGGAAGGAAAAATACAGTGTGAAAGGCCTGTAATAAAAATCAGAATAAAAACTTTGTAGGTGAATCAGACATAAGGCCTATCGAGCGGTAGGCAAAAGAGCACTGTACACAGCTTTTCCTGTGACTTTATTTCCTGTGTTTCTGCATGCTGAGGGGTGGT…	503	539
NM_001108703.1	Rattus norvegicus ribokinase (Rbks), mRNA	1053	TT	TT	TTCTACACCCTCTCCACTGTGTTCTGCTGCAACGAGAGTGAGGCTGAGATCCTAACAGGCCACGCAGTGAATGACCCAACCACGGCTGGAACGGCTGCGCTGGTTCTCCTAGAACGGGGCTGCCAGGTTGTGGTCATCACCCTAGGGGCTTCAGGATGTGTGACACTGTCACAGGCAGAACCTGTTCCAAAGCACATTCCCACAGAAGCAGTCAAGGCTGTGGACACCACGGGTGCTGGTGACAGTTTTGTGGGAGCGCTTGCCTTCTACCTGGCTTACTACCCAAGTCTGTCCTTGGAAGAAATGCTCAAGAGATCTAATTCCATCGCTGCGGTCAGCGTCCAGGCCACAGGAACACAGTCCTCTTATCCATACAAAAAAGACCTCCCTCTTGCTCTA…	401	437
NM_001034004.1	Rattus norvegicus junctional adhesion molecule 2 (Jam2), mRNA	4225	CC	CT	CCCCAAACTTATCTTTGTAAAACT	24	60
NM_001109310.1	Rattus norvegicus EF-hand domain family, member D1 (Efhd1), mRNA	1832	TG	TT	TGTCTGACATCAGCTCCAAAGAACTGAAAGAAATGTATTCTCACCCATGGGACAGATTTTTTTTTTATCTTGTGAGTTTCTTGGGACTTCTCACAAATACCAGGGGGTTGTATTTT	116	152
NM_001109577.1	Rattus norvegicus derlin 3 (Derl3), mRNA	1357				0	-
NM_001109361.1	Rattus norvegicus IQ motif containing F1 (Iqcf1), mRNA	602				0	-
NM_001110494.1	Rattus norvegicus component of oligomeric golgi complex 2 (Cog2), mRNA	2721				0	-
NM_001108234.1	Rattus norvegicus neuraminidase 4 (Neu4), mRNA	2545	GA	GA	GAAAAAAAAAAAAAAAAGACAGGGTCTCTTTGTGTAGCCCTGGTTGTCCTGGAACTCACTCTGTAAATCAGGCTGGCCTTGAGCTCAAAGCTCCATCTGCCTCTGCTTCCCAAGTGCTGTGA	122	158
NM_001108329.1	Rattus norvegicus ligand of numb-protein X 2 (Lnx2), mRNA	4496	AA	GT	AATTTTTCGGATATGT	16	52
NM_001106399.1	Rattus norvegicus spermatogenesis associated 9 (Spata9), mRNA	1036				0	-
NM_001134527.1	Rattus norvegicus grainyhead-like transcription factor 2 (Grhl2), mRNA	4871	GA	AA	GAAGTTTGAAATGAA	15	51
NM_001108150.1	Rattus norvegicus high mobility group 20A (Hmg20a), mRNA	3638	CT	TC	CTCCCTCCTCCTTAGATTGCTTGCCTGCTAAACCCATGCTAGAACTCACTGTCTGGCAGAAGGATACCCAAGCCTGTTCTGGGATTTTGTCTGTCTTCAGCCAGATGCTTCCTGCCCTTCCTTCCTTCCTCCTCATATTGCTGTTTCTCTCTGTGTGCAGTTCTGCGCCATTTCCATAGCACTGATC	187	223
NM_001271177.1	Rattus norvegicus arginyl aminopeptidase like 1 (Rnpepl1), mRNA	3163				0	-
NM_001108113.1	Rattus norvegicus cysteine and serine rich nuclear protein 2 (Csrnp2), mRNA	4544	AC	CT	ACCCCTGAAGACTCAGCCCTAGAACTCCCTCTGGCGGTGTGACTGAGATACATTGTCCATTCTCTATTTATTATCTAATGCCATTTCAAAACAGGACTGCTGCTCCCAGGTTGTTTTGTTGGAAGTCTTAGGAAAGTGGGTAGGAAAGGTTAGTACATGTGTTTTCTGAGAGCGCATACCCAGGAGACCAGCCCCAGCTGCAGGGTCCGTCACCATGCTCTCTGGGCCACCAGAACAAAGGTGTCGATCACGGAGCGAGCTCGGCAGCTCAAGCGGCTCTTTATGCCGAGTGCCAGACCCAAGCATTGAGCAGCTCCCTGCTCCACCCTGGCTCCTCACATCGCGGCGTCTTGTAGCAGCCACACTAGTGGGAAGGCCACTCAGCTGAGCCTACAATGG…	481	517
NM_001104527.1	Rattus norvegicus proline rich 15 (Prr15), mRNA	1441	CG	AT	CGCAATTTGAAGATCTCACGCTCTGGCAGAT	31	67
NM_001013195.1	Rattus norvegicus DNA polymerase delta 4, accessory subunit (Pold4), mRNA	906				0	-
NM_001108579.1	Rattus norvegicus SH2 domain containing 3C (Sh2d3c), mRNA	3078	CA	CT	CATCTATGCCTAGAGGTGCCACGGCCTCTATCTTACTGTAAATAAGCCTGGTGTACATGTATGTACAGAAGCCATGATCTCTTTCATATAATAAACT	97	133
NM_001107984.1	Rattus norvegicus PDLIM1 interacting kinase 1 like (Pdik1l), mRNA	4489	AT	AT	ATGCTTTTGAACTAGAACTCAGATTAGTCCAAATTGCAT	39	75
NM_001109216.2	Rattus norvegicus ankyrin repeat and SOCS box-containing 10 (Asb10), mRNA	1809				0	-
NM_001100978.1	Rattus norvegicus transmembrane protein 127 (Tmem127), mRNA	4388	CC	TT	CCCTGGCTTCCTGTGGTTAGAACCAGGCAAGGAAGCAGAACCAGACAAGAGACTGACTCTTTTGAGGACCCCAGTGAAGGGGGCTGAGTGCCCTAGCCCCTTCACCTT	108	144
NM_001130555.1	Rattus norvegicus meiotic double-stranded break formation protein 1 (Mei1), mRNA	4018	AG	TG	AGCAGTGGCATCCTCTCTCGTGAAGAGGTGGCTCTCATTTTGCAAGGTGCAGCTTTGGCTGACCTGTCAACTCTCTCAAAAGATACACTCCAGGCTCTGCATGGCTTCCTCCTGCAGGTACAGCGCATCGGTCTCCTAAATGACAACAACATGACCCAGACCTTGCAAGCCTCCTTGGAGGGCCTTTGCTCCCGCACCTTCCCAGCCCAGCCAGTCTTTCAAGACATGCTTTGCCTTGGAGGTGTGTCTGTTTCCCTGTCTCACATCAGAGACTGAGACATAAAGGCCCAGAAACAGCAGAAAAAATGAGACCTGCAGATTCAGGACACAATTG	334	370
NM_001017467.1	Rattus norvegicus lymphocyte antigen 6 family member E (Ly6e), mRNA	1289	TA	TA	TATCATGCTCCAGCACAGACAATTACTGTATCACGTTATCTGCTGCCGCGGGCTTCGGGAATGTCAACCTTGGCTACACCCTGAATAAGGGTTGCTCCCCCACCTGCCCCCGTGAAAACATCAATA	126	162
NM_212526.1	Rattus norvegicus potassium voltage-gated channel subfamily E regulatory subunit 4 (Kcne4), mRNA	629				0	-
NM_001127375.1	Rattus norvegicus zinc finger and BTB domain containing 7C (Zbtb7c), mRNA	4065	AT	TC	ATCCAATTGAGCAGTGCTTTTGGGCCATGGGGAAAAACCATCCCTACTGAGCAGAAAGGCTTCCAGCATAGAGTGAGCCCATTTTATATTGGCTTGACCTGTGACCTTAGGTGGGTCAACTTTCTGTGCCTCAGAGTCACCCTGCTGTGAAAGGGGGTGGTAACTTACATTCCCCTCCCCCCATTTCCATACATATTCACACCTGTTCCACTCTGAGCTGACAAGAGTTCCTTGGAAGGTAGAAGTTTAGCATCCCCAGAGTTACTGGGGAGACTATCTTACTGGAGTAAGACACATGGCAGGACAAGACAGGGAACGAGGAATGAGAGAGAGGGCTGGGTAGGGCTTCGTGGCTTTCAATACCCATAGGTAGCTCCAGGAACCCCAAATTCTGCCTCA…	1069	1105
NM_001134756.1	Rattus norvegicus glucosamine-phosphate N-acetyltransferase 1 (Gnpnat1), transcript variant 2, mRNA	1664	AG	TT	AGCAGTTCATGAAATCTTTTGAGCATATGAAGAAGTCTGGGGATTACTATGTTACAGTTGTGGAAGATGTGACCCTAGGACAAATTGTGGCTACAGCAACTCTGATCATAGAACATAAATTTATCCATTCATGTGCTAAGAGAGGGAGAGTAGAAGATGTGGTCGTTAGTGACGAGTGCAGAGGGAAACAGCTTGGCAAACTGTTATTATCAACTCTGACTTTGCTAAGCAAGAAACTAAACTGTTACAAGATCACCCTTGAATGTCTACCACAAAATGTTGGTTTCTACAAAAAGTTTGACTACACGGTATCAGAAGAAAATTACATGTGTCGGAGGTTCCTAAAGTAAAAACCACCATTGAGAGGTTACTTGATGCTACTGTTTTAGAGTTCATTTT…	524	560
NM_001109312.1	Rattus norvegicus von Willebrand factor C domain containing 2 (Vwc2), mRNA	3364				0	-
NM_001395086.1	Rattus norvegicus BRMS1 like transcriptional repressor (Brms1l), mRNA	2558	CC	CT	CCGCGCAGCTGGCTATAGTGTGTACGTAGGGTACAGCCAGATGAAGCACTCTGCTGCTCTCATGCACT	68	104
NM_001108882.1	Rattus norvegicus lysozyme-like 1 (Lyzl1), mRNA	855	CC	TG	CCTGGACAATTACGGGGGATTTACCCTTGGAAACTGGCTCTGCATGGCATACTATGAGAGTCACTACAACACTTCAGCAGAGACTGTCCTGGAGGACGGGAGCACTGACTATGGCATTTTCCAGATAAACAGCTTCACGTGGTGCAGAAATGGAAAAAAACATCAGAAGAATCACTGCCATGTTGCCTGCTCAGCACTGACCACTGATGACCTCACAGATGCCATTCTCTGTGCCAAGAAAATTG	245	281
NM_001001972.1	Rattus norvegicus lymphocyte antigen 6 family member G6E (Ly6g6e), mRNA	959	TT	CT	TTCCTACAGCTGGAGTTCCGCTTCCCGCATGCAAGTGTCCAGAACCTCACCTCATAAGAGACCCTGGCTGCCT	73	109
NM_001108191.1	Rattus norvegicus C-C motif chemokine receptor like 2 (Ccrl2), mRNA	1979	GC	TG	GCAATGAGACTTGTAAAGTTCTTGTTGGACTCCACTCCATGGGCTTGTACAGCGAGACGCTTTGCAACATCCTCCTCCTTGTACAAGGATACAGGGTGTTTTCCCAAGGGCGACTGTCCTCCATCTTCACAACGGTGTCTGGTGGTATTGTTACGTGTGTCCTGGCATGGGCTGTGGCTGCCGCACTCTCTTTGCCCGAAGCTGTGTTTTACGAGCCTCGGATGGAAAGACAGAAACACAAGTGCGGCTTTGGCAAACCTCACTTCTTGACAATTGAAGCACCGATCTGGAAGTATGTTCTGACTTCAAAGATGAACATCTTGGTACTTGTTTTTCCTCTGCTGGTTTTTATATTCTGCTGCAGGCAAATGAGGACAGCGCAGAACTTCAGGGAGAGGC…	854	890
NM_001107851.1	Rattus norvegicus testis specific, 13 (Tsga13), mRNA	1134				0	-
NM_001109016.1	Rattus norvegicus BMX non-receptor tyrosine kinase (Bmx), mRNA	2984	GA	TC	GAACAAGATAAGCCATGAAGAGAAATTTCAGAATGGTGATGAAAATGAATATAAACATTGACCAACACTCTCATTGTTTGTAAGGGGAGTAGAAAGACGCCATGTATTATAGCTAGTTC	119	155
NM_199404.1	Rattus norvegicus mannosidase, alpha, class 2B, member 1 (Man2b1), mRNA	3150	TT	CA	TTGGACCCTACCTCAATCACACTGCAGCCTATGCAAATCCGTACCTTCCTGGCCTCGGTTCAATGGCAGAGACTCATCTAGGCCTGCCAGGAGGAGGGGCAGGCCTCCCCTTCTCTTGCTGGAACCACTCACAAAAATCA	140	176
NM_001025684.1	Rattus norvegicus peroxisomal biogenesis factor 11 beta (Pex11b), mRNA	1456	GA	AG	GATGCTTATGAGATTCGCCTGTTGATGGAACAAGAGACTTCAGCTCACAGCAGGCGAATGAAGATTTCTGGAGTAGGAGTCTCAGGATTAGAGACTGGGGGACCTGGAGGACCAGGGACTCCAGGAGGATGTCTGCCACAACTGGCTTTGAAATTTCGGCTCCGAATCCTGCTACTGGCACGTGTCCTTCGAGATCACCCCCCTCTTCTGCTGGATGTGCTGAGAAATGCCTGTGACCTCTTCATCCCACTGGACAAACTAGGCCTCTGGCGTTGTGGCCCTGGGATTGTGGGGCTGTGTGGCCTCATATCCTCCGTTCTGTCTATTCTCACCCTAATCTGTCCCTGGCTACGACTCAAGCCCTGACAGTGTGGTATGAGATAAGGAGGGAACCCAAAT…	466	502
NM_139080.2	Rattus norvegicus X-ray repair cross complementing 6 (Xrcc6), mRNA	2070	AA	GT	AACCTGGAGGCCCTAGCTTTGGACATGATGGAGTCGGAGCAAGTGGTAGATCTGACACTGCCCAAGGTTGAAGCCATAAAGAAAAGACTGGGCTCCCTGGCAGATGAGT	109	145
NM_001107895.2	Rattus norvegicus mediator complex subunit 21 (Med21), mRNA	791				0	-
NM_001271249.1	Rattus norvegicus nuclear envelope integral membrane protein 1 (Nemp1), mRNA	1906	AG	AC	AGTGCTCTGCCTGGAAGACAATATCTCGAATTCAGTCTCCAAAAAGATTCGCCGACTTTGTAGAAGGTTCTTTTCACCTTACGCCAAATGAAGTTTCTGTTCATGAGCAGGAGTATGGACTAGGGAGCATCCTTGCCCAGGACGAGGAGCTGTCCTCAGAGGAGGAGGGCTCAGAGGACCTTCCTCTGACACAGAACAGTTTCCTGAC	208	244
NM_001108605.1	Rattus norvegicus phosphorylated CTD interacting factor 1 (Pcif1), mRNA	3977	GA	TA	GAGCAGGGCCCTAGTCGAGAGCCTCACCCCACCTAACATATCCTGCGGGGAAGGAGGAACTCCAGGGGTGCTGTTACAGACTGCTGGGACTCAGTCCTCAGGGCTGGAGGGCCCTGGGGTGGCAGCAGGACTTGAGCTGCCAGGGACATAGGAATATTATGGCTCTGCCAGGGCTCCCCCTTCCTGCTCCCACCCTTTCAGATTCACCAAGTCCCTTGTAAATAGGCCCGTGCCTCCCCAGCCCCATACTGACCCTGTTGCTGCCTTGTTTCATTTGTAAAAGGAAATACAGAAACTCCCCAAGAGTGTGTGAGGGTCTTGGGGTGGTTGCCTCGGTGACCATTCCCTAGGTGCCCTTTA	360	396
NM_001108104.2	Rattus norvegicus ALG12, alpha-1,6-mannosyltransferase (Alg12), mRNA	2058	CG	TC	CGTTGCCCTGCAGCAGGCTGGGCCAGGCCCTACAACAGCCACACCTGAGACACAGGGCCGAGAATGTGGAGCCACCACCAAGTGTGATAATGGCCTGTTCAAACCTGTCTGCCATGGTTAGGTGACCCACAGGAGTGTTTATATTCATTCTGGGAGCCATTCAGAACCAAGAGGACAATGAGTCAGGCTAGAACGCCCTGCCACCCTGCTCTGCAGTGACCCCACTATATGTTTCTTGCCCCTGAACCACACTTGTTGCCCATGGCCTCAGGAGACGACGATGTAAAACCAGGTCTTTACAGATTAGACACACACACACACACCACCAATCATGGCAGCTGTTATAGTCCGAGGCATGCTACCTCCATTTCGGATTAGTTCTGAGGACATAACACGTTT…	439	475
NM_001108043.1	Rattus norvegicus mutL homolog 3 (Mlh3), mRNA	5424	AA	CA	AAGAAATTACTGTCTTCCACAATAATTCCTCCACTAGCGATCACCGTGTCAGAGGAACAAAGGAGACTCTTACGGTCTTACCACAAACATTTGGAAGATCTGGGACTTGAGTTGCTCTTTCCAGATGCTAGTGACTCTTCGATCCTGGTGGGAAAAGTGCCACTCTGCTTTGTAGAAAGAGAAGCTAATGAACTTCGAAGAGGACGATCTCCTGTGACTAAGAGTATTGTGGAGGAATTGATTCGAGAACAGCTGGAGCTGCTCCAGACCACGGGAGGTATCCAAGGGACACTGCCGCTGACTGTCCAGAAGGTGTTGGCCTCCCAGGCCTGCCACGGGGCCA	343	379
NM_001109270.1	Rattus norvegicus family with sequence similarity 110, member D (Fam110d), mRNA	1212				0	-
NM_001012103.1	Rattus norvegicus tripartite motif-containing 32 (Trim32), mRNA	3190	GG	CC	GGCAACTATCGCATACAAGTGTTCAACCGCAAAGGCTTTTTGAAGGAGATCCGCCGCAGCCCCAGTGGCATTGACAGCTTTGTGCTAAGCTTCCTTGGAGCCGACTTGCCCAATCTCACTCCTCTTTCAGTGGCCATGAACTGCCATGGGCTGATTGGTGTCACTGACAGCTATGACAACTCCC	184	220
NM_001126295.1	Rattus norvegicus transmembrane protein 250 (Tmem250), mRNA	2478	GG	TG	GGACCCTGCTGCTGCTTGCTTGCTGCAAAGAATTGTTTGCACTAACTCCCACTCTTCCCCCAAAGCAGCATTGTTCTTTG	80	116
NM_001044301.1	Rattus norvegicus mucin 15, cell surface associated (Muc15), mRNA	1513				0	-
NM_001109004.2	Rattus norvegicus TRAF-interacting protein (Traip), mRNA	1930	AA	TC	AAGTGTTTTAGAAGATGGCTCCTCTTGGAACAGTCTAAGAAAGAGGCCCAGAAAACACACTTACTGTGTTCACTGCGCCCTGTACCACACTGGGAAGTGACGTGACCAGTTTACAGTTCTGATCAGCAGGGCCTGCTTCTAGTTGCAGGGTTTTGCTTATAGCTACAACTGGGAGTGGCTGGGCTCCTTCTGGTTTTATAGAACAGGGTCACATTGACTC	220	256
NM_001024255.1	Rattus norvegicus TXK tyrosine kinase (Txk), mRNA	2308	CT	AT	CTCTATCGTCCTCACCTGGCCCCCATGTCCATATACGGAGTTATGTACAGTTGCTGGCATGAGAGCCCTAAAGGCCGTCCGACATTTGCTGAGTTGCTTCAGGTTCTCGCAGAGATCGCGGAAACCTGGTGATCTAAAACGGAACACCAGCCCACAGGGTCATCTTGTAAAACTGTCACAAGGTGGAATCATGGGCATCACTGCTGGGGAGTATCTCCACGAGGGTTGTTGACTCTTGGTAAAGGAGCAAGGGTCACTGGCTTGTCACACTGATTTCAATGCAAAATGCTCTGATGGTAGTCTTTGTACTGCCGTGAGAGAGACTTCTGAACTGCACTCCTCTCACACACTCCACTTCAGCCTTCCAGATGGCTTGCTCATGATAGGTACCCTCACGAC…	644	680
NM_001012238.1	Rattus norvegicus FAM20C, golgi associated secretory pathway kinase (Fam20c), mRNA	2960				0	-
NM_001130500.1	Rattus norvegicus G-2 and S-phase expressed 1 (Gtse1), mRNA	2645	AG	AC	AGACAGAGACTTAGCCGACTGCCCTCTCATCGACTTCAGCAACACCCCTGAGTCGAACATGGCTTTGGGACCTAGCAGCTGGCCCCTGATAGACCTCATAATGAATACTCCAAACATGGGTAGAAGTGATGTGGGGAAGCCTCCAAAGGCTGAGCTCGGCCAGCTGATCGATCTGGGCTCCCCACTGATCCAGCTGAGCCCTGAGGCTGACAAAGAAAATGTGGACTCACCGCTCCTCAAGTTCTGAGCAGAGCACGGCCCTCTGCTGTTTATTCTGTTTCCTTCTGTTGGGGCCTTAGAGCCATAGAAACAAATTTTAGAAGGAATTTCATTTGATAGGGGAAGCCCACTATACTGCTTCTGTCTGGAGTGGTGCCCAGGTGGGGGCCCCACCATGGA…	521	557
NM_001039033.1	Rattus norvegicus actin-like 6A (Actl6a), mRNA	1754				0	-
NM_001013071.1	Rattus norvegicus transmembrane 7 superfamily member 2 (Tm7sf2), mRNA	1510	CG	TA	CGCGCCTCCTGGCCCTACCAGCCTATCTGCCTGGGCTGGAGGAGCTGTGGAGCCCACGGGCTCTGCTGCTGTTGTTCATCTGGCTCGGCCTGCAGGTGGCGCTCTATTTGCTGCCTGCACGCAAGGTGGCCGAGGGGCTGGAACTGAAGGACAAGAGTCGCCTGCGCTACCCTA	174	210
NM_001012094.1	Rattus norvegicus zinc finger and BTB domain containing 43 (Zbtb43), mRNA	5108	TT	TC	TTTGCAGTGACACACGACAGTGCTGGCTAGTAGTGGCCTGTGGCTCCCTGCCTTAGATCACGGTGCTTCCCAACAAGGCCAGCCAGGGACCACAGCTCATGAGACTAAGCCAGAATGTGTGGCTAAGAGTTCCCTGTGAGCAAGACACTTATAACAGAAGGCTTGAGAAAAGAATC	176	212
NM_001107841.1	Rattus norvegicus RAB GTPase activating protein 1 (Rabgap1), mRNA	5015	CA	GT	CACCCTGCAGTGACAGTGT	19	55
NM_001108850.2	Rattus norvegicus trafficking protein particle complex subunit 5 (Trappc5), mRNA	1227	AC	TC	ACATTGGGCTCACTTGGCCTGTGGCTTTCAGATAAGGTTGGAGGCTTGAATGTACTGGGGAAATTGGACACCTATGGAATTGTCAGTGGAGCCTGCAGTCTGGAGGGGCAGGGATATGAGGCTAAGAGGAACCAGGGCCTGGCAAAATGCCAGCGCCATAGCCTAGTTTGTAGGGTGCCCTGGGTTTGATTCCTTACGCCACATAAAATGGGCATAGTGGTGCAGATTGTCTCATCCCAGCACTAGGAAGGTAGAGGGAGAAAGATCCTAAGTTCAAGGCCATCCTCTGCTAAGCAAGTTTGAGATCAGTGGTGGGAGCAGAGGATTCTTTC	332	368
NM_001108518.1	Rattus norvegicus N(alpha)-acetyltransferase 40, NatD catalytic subunit (Naa40), mRNA	3183	AG	TG	AGGACCAAGTTTGGGGACAGTCAGCACTCCCACACGGGCGGGCACTGTGGTGGCTGTTGCCACTGAACTCCTAGAACCACTTGCAAGGGAAGTCACTCTCCTTAGGCCTGTCCTCTCCCCTGGTCTTATGCTACTTGCCAGTTCTGCATGAGCCAGGCCTATCCTGAGAACACAGAACCCTGGGGAGCAGTGACCCCACTGCCTTTCCACCTCCCTCCTGGAAAAGCAAGAGTGCCAGGAGGGAGCACCGAGGACAGGGTGCTGCGCGGATGACAGCTTGGCCATCAAGCCCCGCCTTGTGTAGTAACTGCCTCCTTACTTAGTTCTTGGGCCCCTAAAATGGAAGGCTCCCTCTTGTCTGCATCTGGATTCCTGACAGGGCTGCACACCATGCCCCAT…	552	588
NM_001109155.1	Rattus norvegicus similar to human chromosome 16 open reading frame 92 (C1h16orf92), mRNA	437				0	-
NM_001109294.1	Rattus norvegicus transmembrane protein 266 (Tmem266), mRNA	2402	AT	CT	ATTCTCGGGGACAGCACTGTGAGCAGGGGCTGCCCAGCCTCACCCCAAGCCGTCTTTCCAGAAATGCTGGGGGAGCCGACACAACCACGAAGACCACATCTGAGCCTGTCTCACCCATCATTCTCTCATTCCAGCATGGACATTTCCAAGTCTTCACAGGCCATGAAGGGATGGATCTGGAGGCGGGAGGGGGATGGGAAGGGAGGGGCAGCCATTTTATGACCCTGGCT	230	266
NM_001127650.1	Rattus norvegicus ankyrin repeat and sterile alpha motif domain containing 4B (Anks4b), mRNA	2018				0	-
NM_001109534.1	Rattus norvegicus transketolase-like 1 (Tktl1), mRNA	2438	AT	CA	ATCATTGCTTTTGCTTGCACCTTTGCTGCCTTTTTCACCCGAGCATTTGATCAGATTCGAGTGGGAGCCATCTCTCAAATCAACATCAACCTTATTGGTTGTCACTGTGGGGTATCTACTGGTGATGACAACCCCTACCATATGGCATTGGAAGACCTGGCAATGTTCCGAGCAATTCCTAATTGCATTGTTTTCTATCCAAGTGATGCTGTCTCCACAGAGCATGCTATTTACTTAGCAGCCAATACTAAGGAAATGTGCTTCATTCATACCAGCCAAGCAGAAACAGCAATTATTTACACCACTCAAGAAACTTTTGAGATTGGACAGGCCAAGGTTGTCCGCCATAGTAACGATGACAAGGTCATAGTTATTGGAGCAGGAGTCACTCTGCATGAA…	466	502
NM_001011917.1	Rattus norvegicus calcium binding protein 39-like (Cab39l), mRNA	1427				0	-
NM_001109111.1	Rattus norvegicus WW and C2 domain containing 2 (Wwc2), mRNA	6864	AT	GA	A	1	37
NM_001098782.1	Rattus norvegicus small EDRK-rich factor 2 (Serf2), transcript variant 2, mRNA	2452	GA	GT	GAGTGTATCTTATGTATGCTTTCATCCTACCTGAACCAGTTGGTAAGGGTAACCATGACATAGAGCGAAGCAAGGAAGAAGGCGAAGTGGAAGCCAGAGTAGCTGTAGGAAAGATGCTGGCTCTGCACTTGAGCAGCTGGAGGGGTCTCCTGGTCAGCTGGCCTGGCCCTGCTCCCTTGCCCTAGAGAGAAGTGTGGTGGGAAGCAATGTTGCTGACAACTCCCTTTCCCCAACTCTTGTGAAGGCTCTTGAAGGCTCTGGCCCTTTACAGGGTTCAGCTAGCTGGATTGCTAGATTGACTCACCGTCCTCTGGTTCCACTGTTTGGGGGCAGCAGAAACAGACTGAGGGCTTCTGTAAAACAAGGCAACGTGTTTTGAAATGACTTCAAGAAAGTGTG…	511	547
NM_001008886.2	Rattus norvegicus RT1 class Ib, locus S3 (RT1-S3), mRNA	2682	GA	TT	GATTATATCTCCTTGAACGAGGACCTGCGCTCCTGGACCGCGACTGACATGGCCTCACAGGCCTCTAAGATCAAGTCAGAGGAAGTTGGTGAGGCCCATCACCAGAGGGCCTACCTGCAAGGTCCTTGCGTGGAGTGGCTCCACACATACCTACATCTGGGAAAGGAGACGCTGCTGCGCTCAGACCCCCCAAAGGCACATGTGACCCTTCACCCCAGACCTGAAGGTGATGTCACCCTGAGGTGCTGGGCCCTGGGCTTCTACCCTGCTGACATCACCTTGACCTGGCAATTGAATGGGGAGGACCTGACCCAGGACATGGAGCTTGTGGAGACCAGGCCTGCAGGGGATGGAACCTTCCAGAAGTGGGCAGCTGTGGTAGTGCCTTCTGGGGAGGAG…	1005	1041
NM_001127304.1	Rattus norvegicus neutrophil cytosolic factor 4 (Ncf4), mRNA	1496	TC	CC	TCTGCGTGCTGATGGACCCCGACGTCAGAATATTCTTCTATCAGTCTGCTTACGACGCAGAGCAGGTGCCTCAGGCACTTCGTAGGCTCCGACCGCGCACGCGCAAAATCAAGGGCGTGACTCCACAAGGGCCCAGCATGGACCGCATGGAAGCTCCAAGAGCAGAGGCCTTGTTTGACTTCACTGGGAACAGCAAACTGGAGCTAAGTTTCAAAGCTGGAGATGTGATCTTCCTTCTCAGTAAGATCAACAAAGACTGGTTGGAGGGCACAACCCAGGGAGCCACAGGCATCTTCCCAGGGTCTTTCGTGAAGATCCTCAAGGACTTCCCCGAAGACGAGGACACTACCAACTGGCTGCGATGCTACTTCTACGAAGACACAGGCAAAACCATCAAGG…	492	528
NM_001108401.1	Rattus norvegicus ALG11, alpha-1,2-mannosyltransferase (Alg11), mRNA	1660				0	-
NM_001106824.2	Rattus norvegicus proline-serine-threonine phosphatase-interacting protein 1 (Pstpip1), mRNA	1612				0	-
NM_001130499.1	Rattus norvegicus tetratricopeptide repeat domain 38 (Ttc38), mRNA	1704	AG	AG	AGCCTTCTGATGGAGCGTGACGCCTTGAAACCCAACTCACCCCTGACGGAGCGGCTGATCCGCAAGGCAACAGCTGTCCATCTTATGCCGTGATGGCCAGCAGGGCCCTGGCCTGCAGCTCAGCACTGACCTCCTGGCATTAGATTGGCTGCCTGGTTGGGATAGGAAGTAGCTGGGTCTGTTCATCAGAGGATAAAGTTTAGTCCCAGCAGAACTCCCCAAATCAGTAGTTTGGTAGAAACAGGGAAAACAAG	254	290
NM_001108382.1	Rattus norvegicus coiled-coil domain containing 25 (Ccdc25), mRNA	2143	CA	AT	CAGGGTAGTGAGTGGCATGCAGATCCATATTCTAGCCCACCACACAGTGCCCACAGCTCAGGGGTGCTGAGCCAGCAGAAATGATTTCTTCAGCAAATGTACACCAGCTGTCATCACTGACGTATGACAAAACCAGACTGATGATCCCTGGTATTTCAAGTTGAGTATGAGTTGAACTGGAAAATTCTCTGAGGCATAACTTGTTAGCCAATTTGAGGGGTATGAAAATCAGCACCAGAAATCAGTGTGCGCACGTGTGTGTGTGTGTGTGTGTGTGTGTGTGTGTGTGTGTGTGTGTGTGTGTGTGTGTGAGAGAGAGAGAGAGAGAGAGAGCTTTAGACGAGTTCTGTGAT	353	389
NM_001012145.1	Rattus norvegicus homogentisate 1, 2-dioxygenase (Hgd), mRNA	1698				0	-
NM_001107935.1	Rattus norvegicus DDB1 and CUL4 associated factor 10 (Dcaf10), mRNA	5066	GC	TA	GCATCACCATTTCAACCACACGGCCCTGTCCTGTCAGCATTCCTTTGCCCTGGTCTGTGCCCCTGAGCTTGGGTTTTCTTGGTCGTTTTGCATGTGGCTTATTCTCCTACCCCCGTCTCCACTGTTCCCTGCCTCTTTCCTTCTCTTTGATTTTGAAATGAATTTTATGGACATTTGGCAGGAGCCTTGGTTGGGATGAGAAAACCCATGGCACTAGTA	219	255
NM_001109669.1	Rattus norvegicus Scm polycomb group protein homolog 1 (Scmh1), mRNA	2976	GC	TT	GCCCTTCTATTTATTTCTCAAGGCTAGCCAGCCTCTCACCACAAGTTTAGACTGAGCACCTTTCAAGAGATGAGGAAGACGCCAACCCTAGGACCTTGAAAGGCCCTGGTACCCAGGCCCCTTACCACCTCCTGGGCTTGGCATAGTGTCCCATGGCCCCCAGCTCATGCCTTCTCACTGGATCCCCAGACTCTGAACTTATGGTGCAGACCTTT	215	251
NM_001108989.1	Rattus norvegicus KN motif and ankyrin repeat domains 3 (Kank3), mRNA	2703				0	-
NM_001108445.1	Rattus norvegicus anaphase promoting complex subunit 10 (Anapc10), mRNA	1113	CA	CT	CAACTCGAATTGGTGGAGCCAAGTGGCTGGATTCACGTTCCT	42	78
NM_001037353.1	Rattus norvegicus ETS variant transcription factor 6 (Etv6), mRNA	1900	AC	TG	ACAGACCGTCTAGAACACCTCGAGTCTCAGGAGCTGGATGAACAAGCGTACCAAGAGGATGAATG	65	101
NM_001108216.1	Rattus norvegicus NCK adaptor protein 2 (Nck2), mRNA	2550	GG	AT	GGCTTACTCAGAGGGCAGTGAGGCTCTATGTAGTGAATATGTGACCTTGGCACACACTCCGAGAGCTGTGTCCATGGGTGTTTGGTGCCTCTCATCAGCTATGCTGGTCCAGGCCAGCAGCCTGTGTCCTGGGCCTGCTTTTTTTTTTTGTTGTTGTTGTTTCTGTTTTTGTGGCTCCAGGCTCTGCAGGAGTCCAAAAATGTGCGGATAGCAATACTGGAAACCCTGGGGAGGTGGTGGTGAGGGAACTTCCCAGTGCCTTGGAGGCTGTGCTTGCAATAAAAGAGGGTTTTGGTGAGAGTCAGTCTGCAAAAGAGGGAGGTGGCAACGCAGAAAGAAAGATACTCTGGTGATGTACCCCAGGTGTGCCATCCACATAGTGCTTTTGCCCTTTGGCTT…	422	458
NM_001127201.1	Rattus norvegicus TATA-box binding protein like 1 (Tbpl1), mRNA	1270	GG	TT	GGCGGGAGTTCCATGGAGACTGGGGAGCGAACCCGTTTCATCTTCATCCTTGTCCTCCAGCTTCTTCTCCGCGTCCGACGCAACCAGCAGCAGCGCTGCCGCCGCGTCCTTTACGACCGCCCCGTCTTCCCACGGATGTGATCTTCGTGGTGGGAAACCAAGTTTCTAAACTACCCCAATGGATGCAGACAGTGATGTTGCATTGGACATT	211	247
NM_001108460.1	Rattus norvegicus HD domain containing 2 (Hddc2), mRNA	944	AC	AA	ACTTGAACAAGAAATGTGATGTAATCCAGGCCCTAAAAGAAGCCACCAAACCAGAAGTGGTCAGGAAGGTGCTGTGGATGAAGACTGGAGAAGAGAATGCTTTTTTGTGTGAA	113	149
NM_001024320.1	Rattus norvegicus hyaluronoglucosaminidase 6 (Hyal6), mRNA	2601	AT	TA	ATAAATCCAGAGTTCTACACAGGTAGCTGCCCAGACGATGAAATTTTCCGCAATGACCAGCTCATGTGGTTGTGGGAAAAGAGTGCAGCACTTTATCCTTCCATATATTTGAGTAAAATA	120	156
NM_001108252.1	Rattus norvegicus ubiquitin specific peptidase 51 (Usp51), mRNA	2310	AG	TC	AGACTAGGAAGCGTAAGGCAAAGACATGCATCTGTCGTGTATGTAGTACGCATAAGAACAGACTCCACTCTTGTCTGTCCTGTGTATTTTTCGGATGCTTTACTGAGAAACATATTCATATTCATGCAGAAACTAAGCAACACAATTTAGCAGTAGACCTCTACCATGGGGTTATATATTGCTTTATGTGTAAGGATTATGTATATGACAAAGATATAGAAAAGATTGCCAAAGAAACAAAAGAGAAAATTCTGGGACTC	260	296
NM_001014182.1	Rattus norvegicus mal, T-cell differentiation protein-like (Mall), mRNA	1804	AC	AC	ACTGCAGGATTCATCATGGAAGGGTGTTTGCATTTGGGGGTCTTGCCAAGGACCCCTGCATGCCAAGGGTCCCCACTCAATAGTCCAGTAGGACACAGCCCTGCAACCACCTAAATTACCAAAAGGGAC	129	165
NM_001128287.2	Rattus norvegicus Sep (O-phosphoserine) tRNA:Sec (selenocysteine) tRNA synthase (Sepsecs), mRNA	3559	GA	GC	GACTGCACCATAGTGAGATGAAGCCACAGAGGCCAAGTCTCTGTGGAGCCTACGAGGGAGGGTCAGATGATGCTGCTGGTGGAAATGCTGGCAATGCAGCTTCCTACGCATCAGGCCAAAATGATTTTCTAGAACAAGTGATCTATACTGTGTGATCATCATTTTGC	167	203
NM_001034948.1	Rattus norvegicus zinc finger FYVE-type containing 19 (Zfyve19), mRNA	1594	GA	TC	GAGGGCCACGATAACTTTGATC	22	58
NM_001107801.1	Rattus norvegicus zinc finger, SWIM-type containing 3 (Zswim3), mRNA	2691	TG	TC	TGGCAGAAGAAATACCAACACCTCCTTGACCCCAATGGGGAGCTGCAAGACCGTGGAATAATCCCAAACACCGATGAGCCTGAAAAGCAAGGTCAGAACCACAAGATTCGGGACCTAAGCAGGGAGCTGGCAAACCTGCTGATGCAGACCGAGGGGCCAGAGCTGGAGGAGCGCTGCTCCACCCTGCGCAAGATTGTGGACATCTGGGCAGACCCCTATCAGCGGCCTGAGTCCAGTCAGCAGCAGCCAGTTGACTTCAGAGATGCGGGCTGCCTCCCTTTCCTCTGGGGAAAGCTAGAGACAGGAGACAGCCCCCCTCCTGCTGAAGCCATGGTTCATGATTGAGGCAATTGCACTAATGAGACTCATCTAAAAGCCACCTTTGCACAGTTCAAAGTG…	437	473
NM_001109143.1	Rattus norvegicus claudin domain containing 2 (Cldnd2), mRNA	745				0	-
NM_001014108.1	Rattus norvegicus glypican 4 (Gpc4), mRNA	2669	TG	TT	TGGTGCCCCTGCAGAGGCAAAGCCCTATCTCCTCGCTGCCCTCTGCATCCTGTTCCTCGCTGTGCAGGGAGAGTGGAGATAATTGTCAAACTCTGAGTAAAAGTGTTCATCATCAGAAAGTTCAAAGGCACCAGTTCTCACTTTTTTTTTT	151	187
NM_001134748.1	Rattus norvegicus family with sequence similarity 151, member B (Fam151b), mRNA	1377	GA	GA	GATCCTGGAGTGAAAATATACTAACGTATTTTCTGAGGAACAGGCAGATCACGGCAGAAGACGGTGCTGAGATACTCTGGTACCACGCAGCGAACCACAAGTGTCAGATGAGCGACGCCCTGAAGAGTGCCGCCCACATGATCGAGGCTGATGTCCTTCTTCCTAGCGACGGCTCAGAGCATGGCCAGCCAATCATGGCCCACCCGCCCGAGACAGGCAGTGACAACACTCTGCAGGAGTGGCTGGCTGAGGTCACGAAGAGCAACAAAGGCATCAAGTTGGATTTCAAGAGTCTGGCAGCCGCCCGAGCATCCATGCTGTTCCTGGACAATGTGAAGCAGCACCTGCAGCGGCCTGTGTGGA	363	399
NM_001106163.1	Rattus norvegicus small nuclear ribonucleoprotein D1 polypeptide (Snrpd1), mRNA	832	GG	TT	GGTAGAGGAAGAGGACGTGGTCGTGGCAGAGGAAGAGGGGGTCCTAGGCGATAATGTCTCTCAAGATTGCTGTTTCAGATTGATAAGGAATTTGGGGTATTTTTTGTACAGGTTTTGTTTGTTTGTCAGTTT	132	168
NM_199119.1	Rattus norvegicus DEAD-box helicase 24 (Ddx24), mRNA	2820	CG	CA	CGGCAGAAGCAGATGAAGATTCTGAAGCAGGAGCTACGCCATCTGCTCTCCCAGCCACTCTTTCAGGAGAACCTGAAGACCAGGTACCCCACACAGTCTGGCAGGCCGCCTCAGCCTGTGGTGGCCCCCAGGAATGTCGAGTCTGCACTGAGCTGCCTCTCCAGGCAAAAGAGGAGGAGAAAGAAGCCAAAAGAACACCAGGCACCACCACAGCCAAGTTCTAGCACAAGCTAACTACCTGGTCAGTGTAGTGACTGTTGAGTGACATCCTTCCGTTGTCTGTGAAGGCCTCCCCTCCCTACCCTTCACACCACCATCCACCTGGGCAGACCTCCTGCACACTGTTGTGGAGTGAGTGTGGTAGGCAGCGCCGTGTCTGTATCAGTGTGCGCAGGCTTC…	422	458
NM_001130503.1	Rattus norvegicus adenylosuccinate lyase (Adsl), mRNA	1952	GG	GG	GGGCAGCCGACAGGACTGTCATGAGAAAATTAGAGTGCTTTCCCAGCAGGCAGCTGCTGTGG	62	98
NM_001130502.1	Rattus norvegicus family with sequence similarity 83, member F (Fam83f), mRNA	3062	CT	GA	CTCCCCTTCCACTGAGACTTTTACTGATGTGGAGTTTCAGCTGGGAAAGAGGCACAATGAGGGTTCCATGGCCAATATATCAGGTAGAGGAAGCTCCAGCGTCACCAAGGCCAGCAACTGTGTGATCTCTTGAGCTGCAGGGTATTGGTGGGCGGGACCTTCAGATGCCCACCCATCTGGTCCTGTGCCAAGAACATGGCCTCTTCCCTGCACTAGGAAACGCATCAGACCCTCAGCAGACCTCCTACCCTGTAGCCTCCATTCCAGTCTTAGTGCTGGAATTCCAGACAACAGGATCTGAATCTCATCTCATCATCTCAACCATTGTGTGCCTGCAGCAGACCGTGGTGGTCTGACAAGAAACACCGCTACCGTGTTTACGTGAAGTAGAAGCCTCCC…	1614	1650
NM_001109344.2	Rattus norvegicus docking protein 5 (Dok5), mRNA	1469				0	-
NM_001106899.1	Rattus norvegicus pleckstrin homology domain containing B2 (Plekhb2), mRNA	3266	GG	TT	GGATGACTGGAAACTGTCTGGAGTTAGGAATTGATTTGAGCCTCAGAATTCGAGCCTCTCCTT	63	99
NM_001108650.2	Rattus norvegicus BLOC-1 related complex subunit 5 (Borcs5), mRNA	1852	AT	AA	ATGATGGCCTAGATGTGTTTGACCCACATGGACGTTCCCATGAGAACTGAAGTTGGGACAGTTGAATTCCTGGGAATTCTGTAAGGAACTTTGCATCAAGAGTTATTTTTATTTTGCTCAGATTTTTTGAA	131	167
NM_001012146.1	Rattus norvegicus DiGeorge syndrome critical region gene 2 (Dgcr2), mRNA	2030				0	-
NM_001115046.2	Rattus norvegicus density regulated reinitiation and release factor (Denr), mRNA	815				0	-
NM_001108423.1	Rattus norvegicus RIO kinase 3 (Riok3), mRNA	3843	TT	TT	TTATAAAGAGTAAATGTAATTTATATTTGAAAGGTT	36	72
NM_001170342.1	Rattus norvegicus aldo-keto reductase family 1, member C13 (Akr1c13), mRNA	1237				0	-
NM_001170343.1	Rattus norvegicus SEC61 translocon subunit alpha 2 (Sec61a2), mRNA	2041	TA	GC	TATCGCGGACAGTACAGTAGCTATCCCATCAAGCTCTTCTACACATCGAATATTCCCATAATCCTCCAGTCCGCCCTAGTTTCAAACTTGTACGTCATTTCCCAGATGCTGTCTGTTCGATTTAGTGGCAACTTCTTAGTAAACTTACTAGGACAGTGGGCCGATGTCAGCGGGGGAGGACCTGCTCGCTCCTACCCTGTTGGTGGCCTGTGTTACTATCTCTCTCCTCCTGAGTCCATGGGAGCCATATTTGAGGATCCTGTTCATGTAGTCGTGTATATTATCTTCATGTTGGGGTCGTGTGCATTCTTTTCTAAGACGTGGATAGAAGTTTCTGGTTCCTCAGCCAAAGATGTGGCCAAGCAGC	367	403
NM_001108710.2	Rattus norvegicus cochlin (Coch), mRNA	2442	AG	CT	AGAAGAAGACTGGCAATAAAGACTGCAAGGCAGACATTGCATTTCTCATCGATGGAAGCT	60	96
NM_001107770.1	Rattus norvegicus signal peptide peptidase-like 2A (Sppl2a), mRNA	2173	GT	CT	GTGCTGCCAGCGCAGCCTGCGCCTAGCTGCCCGCCCGTGGGATGGGGTTGCTGCACTCGCTGCACGCTCCCGCTGCTGCCCTGCTGTGGAGCTGCCTGCTCGGACTGTCAGCTGCTCAGGAAGCCATCCTTCATGCATCTGCAAATGGCGTATCTTCACTTTCCAAGGACTACTGCATGTATTATAACAACAACTGGACACGGCTTCCAAGTTCCCTAGAAAATGCAACTTCTCTTAGCTTGATGAATCTGACTGGCACACCACTGTGCCACCTTTCTGATATTCCTCCTGATGGCATAAAGAACAAGGCAGTGGTGGTACACTGGGGACCCTGCCATTTTCTTGAAAAAGCCAAAATTGCACAGGAAGGTGGTGCTGCAGCGTTGCTGATTGCCAACA…	483	519
NM_001130564.1	Rattus norvegicus EFR3 homolog A (Efr3a), mRNA	5309	GA	TT	GAATATGTTGCCAGTTATGAAAAACCTAATGCACTTTTGTTTCCCTTTTTTCTTCTTCATT	61	97
NM_001011935.2	Rattus norvegicus exportin 6 (Xpo6), mRNA	4371	AC	GC	ACCACTATGCTGTTCCAGTTTGTGAACGTGCTGCTCCAGGTCCTGGTTCATAAGTCTCATGACCTTCTGCAGGAGGAGATCGGCATTGCCATTTACAACATGGCTTCTGTCGACTTTGATGGCTTCTTTGCAGCCTTTCTTCCAGAGTTCCTGACTAGCTGTGATGGTGTGGATGCCAATCAGAAAAATGTTCTGGGGCGGAATTTCAAGATGGATCGGGACCTACCCTCGTTTACCCAGAATGTGCACAGACTGGTAAATGATCTACGTTACTACCGACTCTGCAATGACAGCCTGCCCCCTGGCACCGTGAAGCTCTAGGAGTGCCTGCTGCCACCGCCACCTACACCACCTGCACCTGTGCCACGGAAGTCTGTGACAAGCCTTGGCCACTCTCTG…	820	856
NM_001109314.1	Rattus norvegicus zinc finger and BTB domain containing 33 (Zbtb33), mRNA	2561	GT	AG	GTTAGAGCAGATTTACTTGACGAG	24	60
NM_001126099.1	Rattus norvegicus TP53 regulated inhibitor of apoptosis 1 (Triap1), mRNA	1087				0	-
NM_001146125.2	Rattus norvegicus folylpolyglutamate synthase (Fpgs), mRNA; nuclear gene for mitochondrial product	2586				0	-
NM_001034937.2	Rattus norvegicus UBA domain containing 2 (Ubac2), mRNA	2079	AG	TT	AGATTAGCTCCCTCCAGCCTAGGGATTCTGTCCCAACTCCTGATTTCGGTAAAAATAATCTAGTGCCGATGTGCAGTTCTGGAAAGCCCTCATGATACCTCCCTGGGGTTATTTAGCTCAGAATGCATTACGGTGGCCACTCGGGCTAAGGAGAGAATTGGAGTGAAGAAGTTGCTTTAGAGACTAGCAGGGCTGAGCAGAGAGCAGGCGCTGGCCATCATGGCTCAGTCCCAGCCCACCCAACCCACAGGCCCTTACACACACCACTTCTGGCAGCACACCCTCCCTGGCCCCATCCTTGCCCCTTGTGGTGGGTGAGGCAGTGCCCACTGTGCAGACAGTCAGGGAGGTACAGGCAGGAGGCAGCCCCCTGTGAGCAAGAACAGTTGTAGGAATTGA…	521	557
NM_001134620.1	Rattus norvegicus fibronectin type III domain containing 11 (Fndc11), mRNA	1122				0	-
NM_001107909.1	Rattus norvegicus mitogen-activated protein kinase kinase kinase 6 (Map3k6), mRNA	4339	GA	TA	GATGCTGAGTGATGACATCAAGGGACACAGACATGGATGGATGAACAGAGGAGACACAAGCAGCTTTTGACGCACCCGTCCCAGAACCTAGGAGCAAACTGCAGGGCCCAGGACGAACCCCAATGGGTGGAACTAACTAGGGAGGCACCCAAAAGACACTACATACGACCAAAGACTA	178	214
NM_001109432.1	Rattus norvegicus bone morphogenetic protein 8a (Bmp8a), mRNA	1919	CA	CA	CATCCTGCTTCTACGACGGTACCATCTGGTCAGGCCCCTCTCCAGAGGCAGGAAACCCTCTTATGTTATCATAGCTCAGACAGGGACAACGGGAGGCCATCACTTCCCCTGGCCACTTCCTGCTAAATTTTTGGTCCTTTCCCAGTCCCCCTGTCCTCTTCATGGGGTTTGTGGGCTATCGCCCTCCCCTCTCCATCCCCCTACCCCAAGCATAGACCGAATGCACACAGAATCCCAGAGCTGTGCTGACTGAGAGGTCTGGGGTCGGTGCTGAAGACCCACATGAGGAAGACTCGTCCTTGGCCATCCTCAGTCCACAGTTGCAAACTCTGGACGGTCTAAGAAGGCTCTGAAATTTGAAACTGGCTGATCTGGGCTCTGCACCACTCATTATGGTGG…	512	548
NM_001164091.1	Rattus norvegicus COP9 signalosome subunit 7A (Cops7a), transcript variant 1, mRNA	1787	CA	TG	CAGTCCTACAGAGGGTGCTGGCTCTCCACTACCCACACCTACCCCTGCATGCCTAACCTGCAGCTCCTCCTCCTGCCTAGTGGGCTGCATCTGAAAAGCCATGGGGAAGGGGGTCTCCACCTTCATCCCAGCCTTAGAGTTCTGGAGTCAGTCTGCTACCCTGGGAGTCACTGGACATTTTCCTCCCAGAACCCCATCACACTACATTGTCTCTTGTCCTCTCTCATCTCCTTGGGCCTGGGGATACTGCTGCTCCAGTGACCCCAGAGCCTGAGGACAACTATTTCTGAGATG	294	330
NM_001108210.1	Rattus norvegicus heparan sulfate 6-O-sulfotransferase 1 (Hs6st1), mRNA	3269	CA	CT	CAAGCCGAGAACTCAGTCCCCAGGCACCCTGCAACCCTGCAGACACCCCCTCCTAGAATGGGAAGCAGGGAACCTGCCCAGCTGACGCGTCTGAACTGGAACTGTCTCACTTGAACCCAGGAGCT	125	161
NM_001130507.1	Rattus norvegicus uroplakin 3A (Upk3a), mRNA	1026	GC	TC	GCCCCACCCCTAGACAGAGCGGAGGTGTTCTCCAGCAAGCTCCAAGACTGAAATGATCCTTGGCCCCAAGCCATCAGCCCTGACCTGTGGTTGGCAGCAATGCATTTATGCTCTGACTGGGCCAGATGTGAAATAAGACATCTTGGTTCAATGTCATGAAAACACTAAATAAAATC	176	212
NM_001013913.1	Rattus norvegicus solute carrier family 16, member 4 (Slc16a4), mRNA	1981				0	-
NM_001015034.1	Rattus norvegicus TNF receptor superfamily member 14 (Tnfrsf14), mRNA	2089	AC	GA	ACCTAGCCCCAGAGAGTTTTCTGCAGGCCCCAGAGAACTAAGTTTTACTCCCTCAGACACAAGTCTGCTGAGGGATTGA	79	115
NM_001107834.1	Rattus norvegicus PBX homeobox 3 (Pbx3), mRNA	2318	AG	AA	AGTCTGCGCTAATGAGACCATGGATCCAGATTGCCCTGAGATGAAGATCTTGCTGCTACAGAGGTGAAAACAAGACCTGTCTGGGGTTTGACCGTGTGCGCTGGGTGCTGCACAGACTTGTCAAGGTGTGCTCTTCCTCTGGGCAGCCTGGAAAGGCCCTGCTCTCTGGAGTGCTGTATATAGTGTAGCAAAAGAGTATTTATACATCCCACCAATCAAAACACAGCTTTATTACCTCATGCGAACTCATACAAACCAATAGAATCCCAACATGTTCTGTAGCTTAGAGCGCTCACTTACTACCTCTGAACAATACTCACGCTGTAGTTCGTCTCTTTCTTATCTTTTTGCATCTTGTAA	360	396
NM_001048047.1	Rattus norvegicus receptor accessory protein 2 (Reep2), mRNA	1925				0	-
NM_001137645.1	Rattus norvegicus FYVE, RhoGEF and PH domain containing 6 (Fgd6), mRNA	4732	CG	TA	CGAGAGTGTGCGAGCTCTGCTTCCAAGAGCTGCAGAAACTAGATCACCAGCTGTCCCCCAGGATTGGGTCTCCTGGAAATCACAAGTCTCCTTCAAGTGCCTTATCTTCAGTCTTACATAGCATCCCCTCAGGGAGGAAACAGAAGAAAATCCCTGCTGCCCTCAAAGAAGTGTCAGCGAACACAGAGGACTCCACCATGAGCGGCTACCTCTACAGATCCAAGGGCAGTAAAAAGCCGTGGAAACACCTATGGTTCGTCATCAAGAACAAAGTGCTCTACACATACGCTGCAAGCGAGGATGTGGCAGCTTTGGAAAGTCAGCCCTTATTGGGATTCACCGTCGCTCAAGTCAAAGACGAGCACTCGGATCCTAGAGTGTTTCAGCTGCTGCACAAAG…	661	697
NM_001109566.1	Rattus norvegicus testis expressed 38 (Tex38), mRNA	805	AG	CT	AGGTGAAGCCTCTGGTCTCTTGCAACATGTTTTGGCGGTTCCAAAGCAGCCCCTGTCTTCAACAATGCCACAGCCTCGGACTGACTCCCCATTCCCACTCCCCATCTTTCAGGAGGTGCCCTTTGCCCTATCTCTCTGCCACCTGCCTCCCATGTTGAATCACTCTGTCTCCTACCCTTTGGCCAACAGTCCTGAAAGGAATGTTCATTTCCGTTCCCTCCCAACACTAGCCCATGGAACAAACTGCT	248	284
NM_199499.1	Rattus norvegicus leucine-rich repeat LGI family, member 4 (Lgi4), mRNA	2630				0	-
NM_001106203.2	Rattus norvegicus zinc finger, HIT-type containing 6 (Znhit6), mRNA	1586	GG	AA	GGTCAAGAAGATTGTGTATGCTGGACTGCGGGCGACTGGGTCTGTCAGGAGCTCGGAGTCTGTTGTTTGTCTGAAAAGTAA	81	117
NM_001033064.1	Rattus norvegicus Kazal-type serine peptidase inhibitor domain 1 (Kazald1), mRNA	1645	AC	AT	ACCAGCTGAATGCCACAGGATTCTCCCAGCTGCAATCCCAGGGTTTGATTCCTGAGGAGGAAGCAGAAGATGAAGAGTTGGAAGATTACTACTAGGTTCAGATCTCTGGCTTGTGGGTATGGGCAGGGTGGATATAGCACCCCAACCCTGCTGTGGAGAAGGCCTGGAGAAGACTGGAAGGGACGAGCAGGGTCCTTTCATGGATTAT	208	244
NM_001128187.2	Rattus norvegicus BCL2 interacting protein like (Bnipl), mRNA	1697	CA	CT	CAGCCCAGGAGCCAGCTTGCAAAATCTTGAATAGCCAACAACCCCTTCTTAGTCATCAGCTGCCTATGATCCTGAGAATTGCTGTCAAAACCTGTGTTTTCACACTCCTTAGTAAATTCAGACCTGTGGCCT	132	168
NM_001107772.1	Rattus norvegicus zinc finger CCCH type containing 6 (Zc3h6), mRNA	5324	CT	CC	CTGATGTGCAGACAGATGTCCTCAGCAGTGCTGATGGGGTTCAGGCCCCTGCTGTGCACAGTCTTCCTATTCAGGCC	77	113
NM_001106958.1	Rattus norvegicus G protein-coupled receptor 143 (Gpr143), mRNA	1612	TT	TG	TTTTTCAAAATAATGCTGGTG	21	57
NM_001109335.1	Rattus norvegicus FA core complex associated protein 24 (Faap24), mRNA	1821	GG	GG	GGGTTGGTAAGG	12	48
NM_001109134.1	Rattus norvegicus similar to human chromosome 1 open reading frame 198 (C19h1orf198), mRNA	2991	TC	CT	TCCTGTCAGGAGCAGCAGAATCTGCCCCTCGGCCAGGTGCACCCCACATGCCAGTGTGGGGGTGGCCTTCCATTCCTCACCCTGCCCTCTCCTTTGATACATACTTTCGAAATCGTAAATTCTTACTGACAGCTTGTAACTTGGTCCTATTTTATACTCTAGCCT	165	201
NM_001017513.1	Rattus norvegicus SERTA domain containing 3 (Sertad3), mRNA	1338	AC	AC	ACCTTGTGCAATAGGGCAGAAATCTACCAGCTCCAAGCCGTGCTAC	46	82
NM_001109097.1	Rattus norvegicus myozenin 1 (Myoz1), mRNA	1242	CA	CT	CACAGTAGGGGTTGGAGAGCCAGGATCAGGTGACCAGGCAGGTGGAGATGGGAAACACGTCACTGTGTTCAAGACATATATTTCCCCGTGGGATCGGGCCATGGGGGTCGACCCTCAGCAAAAAGTGGAACTTGGCATTGACCTGCTGGCATATGGCGCCAAAGCTGAACTCCCCAAGTATAAGTCCT	188	224
NM_001011710.2	Rattus norvegicus cysteine-rich secretory protein 2 (Crisp2), mRNA	1440	AA	CA	AAAATCAATATAAAATGTGGCGAGAATCTCTATATGTCGACTGACCCTACATCCTGGAGAACCGTAATTCAAAGCTGGTATGAAGAAAATGAAAACTTCGTTTTCGGCGTAGGAGCTAAACCCAATTCCGCTGTCGGACACTACACTCAGCTTGTTTGGTATTCATCTTTCAAAGTTGGATGTGGAGTTGCTTACTGTCCCAATCAAGATACCCTGAAATACTTCTATGTTTGCCATTACTGTCCTATGGGTAACAACGTGATGAAAAAGAGTACCCCATATCATCAAGGGACACCTTGTGCTAGTTGTCCCAATAACTGTGATAATGGATTGTGCACCAATAGCTGTGATTTTGAAGATTTACTTAGTAACTGTGAATCCTTGAAGAGTTCAGCAGGC…	461	497
NM_022634.2	Rattus norvegicus leukocyte specific transcript 1 (Lst1), mRNA	438	TT	TC	TTCTATCAGAGAGTGAAGAGACTAGAAAGAAACGCCCAGGTCTCGGGGCAGGAGCTCCACTACGCCTCTCTCCAGAAGCTGCCCGCATCCAGCAGTGATATGGAAGGCAGAGGAGAAGGTGAAGGCGTAAAAGAAGACGCCAGCACTGACTATGCCTGCATCGTC	165	201
NM_001109418.2	Rattus norvegicus suppressor APC domain containing 2 (Sapcd2), mRNA	1581				0	-
NM_001109179.1	Rattus norvegicus ribosomal biogenesis factor (Rbis), mRNA	412				0	-
NM_001109591.1	Rattus norvegicus junctional sarcoplasmic reticulum protein 1 (Jsrp1), mRNA	1159				0	-
NM_001134608.1	Rattus norvegicus transmembrane protein 170A (Tmem170a), mRNA	1959	GT	AG	GTCCGTTAGGGTGCACTTCGAACCTTCAGGCACAGATGGGAAGATACTTGCAGGATTCTGTTAGAGTCTGTCGTGGTGGTTTCTGTTGATTTGCTGAGTCTGTGCTCCTGCAGTGTTGCTGAAGGAG	127	163
NM_001108868.1	Rattus norvegicus ring finger protein 31 (Rnf31), mRNA	3394				0	-
NM_001106323.1	Rattus norvegicus ras homolog family member D (Rhod), mRNA	1486	TG	CA	TGACCTACCACAGGGGCCATGATATGGCAAGGTCTGTGGGAGCAGTGGCCTATCTCGAGTGTTCAGCTCGGCTCCATGACAACGTGGAAGCCGTCTTCCAGGAAGCAGCTGAAGTGGCTCTCAGCAGTCGCAGTCATAACTTCTGGCGGCGGATTACCCAGAATTTTTGCGTGGTCACCTGACTGGTTTGGAACTCACCTTGCCTTCCGATTTACTCAGCTGGAGAAAGACCCAGGAGCAGACCTTCTACTCTGTTGACTGGGATGGACCTAGTCCCCAGGCTGAACTGGTAGAACCACACAGCCACAGATGGACTCCACTGAGGCCTGGCCCCTGGACAGAGGAATCCTGGATTGAGGAAGAGGGTTCCCAGACCCTTAGCTCTGGAACCA	392	428
NM_001108973.1	Rattus norvegicus solute carrier family 1 member 7 (Slc1a7), mRNA	2786	TC	AG	TCCAGGTAGAGCAGGATGAAGAGCTGGCCACTGCCAGCCTAGACCACTGCACTATCGAGATCAATGAGCTGGAGACCAATGTGTGAGCCTGCAGGGCCGCAGAGCCAGGCCAGACCCTGAGGTTTGGGCTAAGCGTAGGAG	141	177
NM_001009640.1	Rattus norvegicus UTP4 small subunit processome component (Utp4), mRNA	2230	AA	AT	AAGATGGTTTTAGACAGGCAGCACCTGGGAGTGACCAAGTCAAGGTGCATAGTGTGGGGTGTTGCCTTCCTGTCCGACGGCACTGTCATAAGCGTGGACTCAGTTGGAAAGGTGCAGTTATGGGACTCAGCTACTGGGACACTTGTCAAGAGCCATCTCATCGCAAACGCTGACGTGCAGTCTATTGCTGTTGCTGATCAAGAAGACAGTTTTGTGGTGGGCACAGCCGAGGGCACAGTGTTCCATTTCCAGCTGGTGTCGGTGACTTCCAACAGCAGCGAGAAGCAGTGGGTGCGGACGAAACCATTCCAGCACCACACACACGACGTGCGCACTGTGGCCCACAGCCCAACAGCCCTGATATCAGGAGGCACCGACACCCACCTAGTTATTCGGCCT…	1381	1417
NM_001108932.1	Rattus norvegicus trypsin like peroxisomal matrix peptidase 1 (Tysnd1), mRNA	2313	TT	CC	TTTGGCATTTCTGTGCCTCATAACCCCTGGCTACCCAAAATGGTTACACTACAGCCAAGGGCTCTTGCCTGGTACTCTGTACTCAGAGAACTCTGCGTGGAAGCCCAGAGTCCTAGTGGTCAGTAACAGGAGTGTTTTCCCGTTGCCATAGTGATATGTAGGCAAATCCCTGAGAGCCACCTGGGCC	187	223
NM_001037789.1	Rattus norvegicus coiled-coil domain containing 28A (Ccdc28a), mRNA	1267	TC	GT	TCACACGGTGGTGGTGCACAGGTGTCCTGTAGCGGTCCAGCTTCAGTTTACGTCAGACAATCAGTACACACGCAGGTGTGTTTCCCAATGGCCAGTGACAAATGT	105	141
NM_001108494.1	Rattus norvegicus family with sequence similarity 168, member A (Fam168a), mRNA	4391	AG	AT	AGTCCTGGCAGGCTTCCTAGACTCTCCAAGCTCCAGGTGACCTGGTAGCGGAGAAGAAAGTAGACCCAGGAATGGCCTTTTAGTGTTTGTTTTTTCCATACCAGTAAATAAAAGCTGTTTGCGCCCTCACTATTCATGTAGGTTAGCCCTGAGAGACAAGGCATGGTGCCTGCTAT	176	212
NM_001127547.1	Rattus norvegicus fibulin 1 (Fbln1), mRNA	2787	TT	CA	TTTGCAGCACGGCCAGGAGTGTACCCCTCCGCCTGGCCACGCCCTTGCTCCCAGTGACTGCCAGGTGCCTGTCTGTACCCCTCGGGCGTTCCTTGGTGTTTCATGTTGGTTTGTAAGGCCACATACA	127	163
NM_001108449.1	Rattus norvegicus component of oligomeric golgi complex 4 (Cog4), mRNA	2773	CT	CC	CTCTCCCAGATGGCTACAATCC	22	58
NM_001134985.1	Rattus norvegicus REST corepressor 3 (Rcor3), mRNA	1869				0	-
NM_001109274.1	Rattus norvegicus suppressor of cytokine signaling 5 (Socs5), mRNA	4233	AA	TT	AAAGAAATGCTACATCTGTATGCAGCACTAACCCTTTGACCGCTAACGTATGTTTCTGCTTGCTGTGCCTTGTTCTGGCTGCTTTTTCGTGCTAATAAAGTCTGTTTGGTGTTCTCCCTGTATATCTGCTGTTTTCTACATTTGCCACAGTTTCTCTTGTACGTGGAATGGTTTGGGGTT	180	216
NM_001108427.1	Rattus norvegicus prefoldin subunit 1 (Pfdn1), mRNA	1100				0	-
NM_001109404.1	Rattus norvegicus Ras suppressor protein 1 (Rsu1), mRNA	1582	AA	TT	AAACCCCTTGCAGCCAAGAACAAATGAGGAGCACACACACACACACACACACACTGGTTTCTGGCCTCCTTGAAGCTTTAGCTCTTCTGGCCATCCTTGCTCTGTCCCACAAACAAACAACAGCGTGCTGGTGCCTACTTTTCTCTTCTTTTTCTTTTTCTTTCTTTCTTTCTTTTTTTTTTTTTTGAAAGAAAATTCTTTTCCCTTTCTCCTCCTGGTGCTTGAACGCAGCCTCCCTTTTGCACCTTTCTTGTGGAGGGGTGCACTTTTTATAAAGTCTTACATTCCTGCTCATTTGTTTCTTCTTTTTTTTTTT	316	352
NM_001109529.1	Rattus norvegicus Kin17 DNA and RNA binding protein (Kin), mRNA	1396	AG	TT	AGACAGGCTGAAACTGGACCAGACTCATTTAGAGACAGTCATTCCAGCCCCAGGGAAAAGAGTTCTAGTT	70	106
NM_001122781.3	Rattus norvegicus LETM1 domain containing 1 (Letmd1), mRNA	2448	GA	GC	GAGACCAGATTGCATTGAGATAGTGAGTTGGGC	33	69
NM_001014186.1	Rattus norvegicus origin recognition complex, subunit 5 (Orc5), mRNA	2115	GA	TG	GAGTATTTGGAAGCAACGTG	20	56
NM_001109473.1	Rattus norvegicus general transcription factor IIIC subunit 4 (Gtf3c4), mRNA	4048	CC	TA	CCCTCATCACAGCTCCACTTCATGCCCATGTGGTAACCTAGATATTTGTACATACGGGGGAAATGTTGTCTCCTTTTAGTA	81	117
NM_001100908.1	Rattus norvegicus niban apoptosis regulator 3 (Niban3), mRNA	2399	TG	TT	TGACAGAGCCCGTGCCCCAGCTGACTGCTCAGTAGCCCAGTGGGACCAGGAAGGAGCAGATGAGGAAGCTGAGGCTCAGATCTGAGAGAGACTCTGCAGGCCAAATGCAGCCACTCTGTACAACATGGCTTCCAAGAACATTCCAGAGCTGAGTT	155	191
NM_001107624.1	Rattus norvegicus AT-rich interaction domain 5B (Arid5b), mRNA	4037	TA	AC	TAGGAAGTTCCTACGGGGACCTGTTACACAATAGCATCTACCCTTTAGCTGCTATCAACCCTCAGGCCGCCTTCCCGTCTTCTCAGCTGTCATCCGTACACCCCAGCACAAAACTGTAAGCCTCGCCGCGCCCAGCATCCCCAAACGGTGTGGTCCATGCACCGAGCCTGCCTGGAGGGCTGGTTGCAAAGTTGGAAGTCAGTATCCCTTCTAAAAAGGTTTCGTCCCAGCCATAGAGGTGAACGTACCTACCTTTTCGGGGACAACCCTAGGCTGGCTGGCCAGTTGTGACCTCCCTTCCAACACAGATGGCCTCGGGCCTCCAGGTCCTTGTCTTTTCACATTGGTCTTATGAAGGGATCTGTGGTCTATCCTAGAAGAACGCAGAGGACCCCATCA…	552	588
NM_001134603.1	Rattus norvegicus testis expressed 26 (Tex26), mRNA	1463	TG	AT	TGGACAGAGGAAGCTTCAGTCGTTTTCTAATAATCAAGAAATAATAATAATCAAGAAAAATAGGTGAAATTTCTCCAAATATATTGTGCTAGTATGGACCTGCATGTTCTGATTTGCTAAAGTGGAAGGAT	131	167
NM_001107810.1	Rattus norvegicus protein-L-isoaspartate (D-aspartate) O-methyltransferase domain containing 2 (Pcmtd2), mRNA	3547	TT	TT	TTCTGTTGCTGGCATTGAGTTCTTCTGAGTTTTGCCTTTTTCTAGGTTGGGAAATGTTGAAAATCCCCCCTTATT	75	111
NM_001108604.1	Rattus norvegicus recombination signal binding protein for immunoglobulin kappa J region-like (Rbpjl), mRNA	2592				0	-
NM_001109451.1	Rattus norvegicus protein phosphatase 1, regulatory subunit 35 (Ppp1r35), mRNA	940				0	-
NM_001134576.1	Rattus norvegicus ciliary associated calcium binding coiled-coil 1 (Cabcoco1), mRNA	1283				0	-
NM_001012229.1	Rattus norvegicus XK related 9 (Xkr9), mRNA	1909				0	-
NM_001126079.1	Rattus norvegicus acyl-CoA binding domain containing 7 (Acbd7), mRNA	533	AA	AC	AAGATGAAGAGCTCAAGGAACTCTACGGGCTCTACAAACAGTCTGTCATCGGAGACATCAACATTGGTGCATGTCCAGCAATGCTGGAC	89	125
NM_001077673.1	Rattus norvegicus RAD18 E3 ubiquitin protein ligase (Rad18), mRNA	1737	GG	AG	GGTTGGCGATGATGAAGACAATAGATGACTTGCTGCGCTGTGGGATTTGCTTTGAGTATTTCAACATTGCAGTGATAATCCCCCAGTGCTCTCACAACTATTGTTCTCTCTGTATAAGAAAATTTTTGTCCTATAAAACTCAGTGCCCAACTTGTTGCGTGGCAGTAACAGAGCCAGACCTGAGAAATAATCGCCTCTTAGATGAACTGGTAAAAAGCATGAGTTTTGCACGGACTCGCCTGCTGCAGTTTGCCTTAGAGTCACCACCTATATCTCCTGTGTCTTCCACCTCAAAGAAGGTTGTAG	306	342
NM_001109070.1	Rattus norvegicus golgi transport 1A (Golt1a), mRNA	785	TG	TC	TGAGCTCCTTGAATTCGGATTGTTGGCGAGGGGGCTGGAAGGGGAACATGGGCTATCTTCACGAGACCCCTCCCCAGCATTGACTTCCTTCCCATCCGTCACACACGGCTGTCTCCAAGTCCAGAAGAAAGATGGAGCTGAGGGATGGATC	151	187
NM_001108818.1	Rattus norvegicus polysaccharide biosynthesis domain containing 1 (Pbdc1), mRNA	1629	GA	GG	GAAGGCTATAACAAAGCAGTTTCCGTCAGTGTTCAGGACAAAGAAGGAAAGGAAGGAGCTGACAATAAAGAAGAGGAAGCTGAGAAAGGAGCTGATAGTGGAGGAGAAAAAGAGGAAGGAGTCAACAGAGAAGGAGAAAAGTAAAAAACTAAACAAGGGAGGAGAAAAAGTCAAGAAACCTGTGACTCAGCTGAACCCACACATGTCTGTGCTGCTCACACAGCCCCCATTGG	233	269
NM_001034157.2	Rattus norvegicus G patch domain and ankyrin repeats 1 (Gpank1), mRNA	1407				0	-
NM_001130541.1	Rattus norvegicus collectin subfamily member 10 (Colec10), mRNA	4552	GG	TG	GGAGGGATGCTGGCCATGCCTAAGGATGAAGTTG	34	70
NM_001033868.1	Rattus norvegicus surfeit 4 (Surf4), mRNA	2770	TC	TT	TCTATAAGCCCATGCATGACTTCCTGAAATATGACTTCTTCCAGACCATGTCAGTGATTGGAGGCCTGCTCCTAGTGGTGGCTCTTGGCCCAGGGGGTGTCTCCATGGATGAGAAGAAGAAAGAGTGGTAACAGACAGATCCCTCCCCTCCCTGGCTGAGGCACAAGGCCCTGGACTGGTTCAGGGTAGAGTCAACAAACTGCCAGCATTTATGTGTCCTTTCCCCTTCCCCTCCCTTGGTAAAGGCACAGATGTTTTGAGAACTTTATTTGCAGACACCTGAAAATCGAAGGTAAAATCTTCTTTGGAAATAGTCTGGAGTCTGACTGTCCAGGGCTGGCCAGCTGGATGGTCACTCCTTACTTAGCTAAGGCTTGGAATAGACAGTGTGGTGGGCTG…	497	533
NM_001033924.1	Rattus norvegicus Fc epsilon receptor II (Fcer2), transcript variant 1, mRNA	2025	AA	TA	AAGTGAGTCCTCCCATCAAGTGTGCACCAGTGAAATCCAGTCATGGCTGGTCCCCAGCATTCCTACCCTCTTTGGAGCTGCACTAGGTGTACTCCTGGTGTGGTACTTATTGAAGGGACTGTGGCCAGCTCCAGCGTGGTGAGCTTGGCTCTGGGAGGCCTTGCCCTTCTCTCCCATTCCCTCTGCCTTGCTAAAAGTGTTAGATCACATTCCTGAGGCTAGACCCCAAGGTCTATCCCCTTATTTGGCCACTTTCTCCTCCTGAGGCCGCCTACAAAGGTCCAGCTATCCAAGTA	296	332
NM_001014113.2	Rattus norvegicus UTP14A small subunit processome component (Utp14a), mRNA	2488	TT	CA	TTTCTCA	7	43
NM_053523.1	Rattus norvegicus homocysteine inducible ER protein with ubiquitin like domain 1 (Herpud1), mRNA	1857				0	-
NM_001143881.1	Rattus norvegicus interleukin 20 (Il20), mRNA	1182	AG	CT	AGAAGTCAATAACCCTGACCGATCTCTTTGAACTTCCACTTCTGGTCTCCAGGATCTAGGTGTAAGATGAGAGGCTTTCGTCTTGCCTTTGGACTGTTCTCCGTTGTGGGTTTTCTTCTCTGGACTCCT	129	165
NM_001107815.2	Rattus norvegicus Tnf receptor-associated factor 2 (Traf2), mRNA	2098	GG	GA	GGAGGACCTCAGCCTAAAGCCAATCACCATCACACAGACAGGCAGGAAGGAGCCTCCAGTTGGTCCTCAACTGGTAAACTGAGTTGGAGGGTCAGCTGAGCTCAGGGTCCTGGGGGAACCAGCTGGGGATCTTCTCTTGCTGTATTTTCTGTCTGGGGAAGGGAGACACCCTTTGGTGGGGTACTCAGAAAGGGCCTCTCAAGAGAGAGCCTCAAGAGCTGCACCAGGAGCAAGAGTGATTGGCCTTCCCCAGCCCAGCCTTTGGGAAAGAGGCAGGGGCTGCCCAGGAAAGGCATGCGCCTGCAGAGTGCAGCCCAGGAGAGAAGCGCTCTGGGACATAGGCACGCACTGGAGCAGGGCCTGCCTGGGCTGCACAGCCCTGCCAGGTGGCCTGTATGG…	410	446
NM_001033700.2	Rattus norvegicus ceramide synthase 2 (Cers2), mRNA	2034	TC	TT	TCTCCAGGTAGAAAGGAGGCTTGGCTGTATCCTGTTGAGACGGGACTGTCTGGTCTCATTTCCCTCTCTACCTTCCAAGCTACCCTTTCTCCTGCTAACCCTTCTCAGCTCTAAGGGTTGGAGTCATAACTCACATTCTTCATTCCTAAGAATCTGGAGCTAGCTGTTTGCCTTTGACTCCCTGACTTCAAGCCAGGGTTGTGCCTTACTGTCCCTTTTCTGGGCCTCATTCTGCCAAAGCTGGACCAAGGTTCCACCTTTCTAAGCTCCCTAGCTCAGAGGCCAAAAATGAAAGCTGAGCTACTT	306	342
NM_001100679.1	Rattus norvegicus lysine demethylase 2B (Kdm2b), mRNA	5190	GA	GT	GACTCTCTGACAGAGATCAACCTATCGGACTGCAATAAGGTCACTGACCAGTGCCTGTCCTTCTTCAAACGCTGTGGAAATATCTGTCATATTGACCTGAGGTACTGCAAGCAAGTCACCAAGGAAGGCTGTGAGCAGTTCATAGCTGAAATGTCTGTGAGTGTCCAGTTTGGGCAAGTGGAAGAGAAACTCCTGCAAAAACTAAGTTAGCTCCAGGACAAGGATGTAAATATGGGGGTTTGGGGGAATACAGCCAGGGAGAGGGAAGACTGCAGAGACAAGTGGGCCTGTATTTCCCTTTGGAATCTGAAACGAGACTACAGGACACAGTTCTGTTTTGCAAGTCTTGCCAAGGGAGAAGCCGTTCAACCACCCATTTGGGGATGAGTGAGCCAGATG…	696	732
NM_001106141.1	Rattus norvegicus RGD1562699 (RGD1562699), mRNA	389	CG	AT	CGAGGCTCTGCGATTACACGATTACACGTGCAGATGCATGCTCGGGCTGGTTGAACACGGGAAGGAGAAAACTAAAACTAAAGCGTAGGGCCAAGTCTCTCGAGCTTCTCAGCCTGAAAAAAAGAAAAATCTATCAAGGCTTTTCAGATGTCCTGCTGGGTCTAGGAAAT	170	206
NM_001287109.1	Rattus norvegicus ubiquinol-cytochrome c reductase, complex III subunit XI (Uqcr11), transcript variant 2, mRNA	522	CA	GT	CATGTGGGGCACTGTGGGTGCCGTGGGACTGGTGTGGGTCACGGACTGGCGGCTGATCCTGGACTGGGTGCCGTACATCAATGGCAAGT	89	125
NM_001011915.1	Rattus norvegicus FERM domain containing kindlin 2 (Fermt2), mRNA	3239	CT	AA	CTGTGTTCTAGTCTTTTGCGCTGTTACATCTGCGTTGGTGCTAGTTAGACAATTCCTAGCTCACGAGCCCAGAAGGGCGCCAGGGAGGGGTGGACTTACCAGTATTTTCCAATAATCCATGAA	123	159
NM_001127553.2	Rattus norvegicus ubiquinol-cytochrome c reductase binding protein (Uqcrb), mRNA	1054	AA	GG	AAGTGGTATTATAATGCAGCGGGCTTCAATAAACTGGGG	39	75
NM_053382.1	Rattus norvegicus TNF alpha induced protein 6 (Tnfaip6), mRNA	1401	AG	GA	AGGCTTCCAGA	11	47
NM_001107531.1	Rattus norvegicus mesoderm posterior bHLH transcription factor 1 (Mesp1), mRNA	1275				0	-
NM_001106756.1	Rattus norvegicus NADH:ubiquinone oxidoreductase subunit B11 (Ndufb11), mRNA; nuclear gene for mitochondrial product	849	GA	GC	GAAGCTGAGAGACTTGTGAAATACCGAGAACTCAACGGCCTCCCCATCATGGAATCCAACTATTTTGATCCCAGCAAGATCCAGTTACCAGAAGATGACTGACGAAATACTGAGCAGGGC	120	156
NM_001106781.2	Rattus norvegicus NADH:ubiquinone oxidoreductase subunit A12 (Ndufa12), mRNA	597	GC	GA	GCTAGTTCAGGACTGTCCTTAGCTGACCATGAGCTTGA	38	74
NM_001126097.2	Rattus norvegicus ubiquinol-cytochrome c reductase, complex III subunit XI (Uqcr11), transcript variant 1, mRNA	526	CA	GT	CATGTGGGGCACTGTGGGTGCCGTGGGACTGGTGTGGGTCACGGACTGGCGGCTGATCCTGGACTGGGTGCCGTACATCAATGGCAAGT	89	125
NM_001106330.2	Rattus norvegicus tRNA methyltransferase activator subunit 11-2 (Trmt112), mRNA	591	TG	CC	TGCGACAACATGAAACTGCTCACCCACAATCTCCTCAGCTCGCATGTGCGGGGCGTGGGCACGCGTGGCTTCCCGCTGCGCCTGCAGGCCACCGAGGTCCGCATCAACCCTGTGGAGTTCAACCCCGACTTCGTGGCGCGGATGATCCCCAAAGTGGAGTGGGCGGCGCTTGTGCAGGCAGCGGACACC	189	225
NM_001106646.1	Rattus norvegicus NADH:ubiquinone oxidoreductase subunit B6 (Ndufb6), mRNA	629	GC	TC	GCCCTGTGGAAGTACATGATCTTCAAGGCGTACCGCACCAGTCTCTTCACTGTTTCCCATGTGATCATACCTCTCTGGTTCGTCCACTATTACGTCAAATATCATGTGGCTACTAAACCATATGCCATTGTTGGCACGAAGCCCAGAATATTTCCAGGTGATACAATTCTGGAGACTGGAGAAGTAATTCCACCAATGAGAGATTTTCCTGATAAACATCATTGAAGAGCTC	232	268
NR_002703.1	Rattus norvegicus ribonuclease P RNA component H1 (Rpph1), RNase MRP RNA	257				0	-
NM_001107694.1	Rattus norvegicus regulatory factor X5 (Rfx5), transcript variant 1, mRNA	4175	TC	AG	TCGGCACATGCTCACGTTCTCAAGGCAGGGGGGCTTGCCGAAGAGGAAGAAAGAGGCCCTCGAGAACGGTCATCATGTAAGTCCAAGAATGGTGTAGAGAACCTGGAAGGTGGAGGACCTAAGAAACCAGAGAGACCAGCGCAGCCTCCTAAAGAGCTAGAAGCCCGAGCTGGGACTGACTCTCCAGGGCGTTCAGAACGGAAGAAGAGTGTAATTGACAGCTCAGTTCCAGCAGCCAGTAAGCCACAAG	250	286
NM_001044240.2	Rattus norvegicus growth differentiation factor 1 (Gdf1), mRNA	2683	GT	GC	GTGTAGGCTCGCCCTGCTGCGTGCCAGAGCGTCTGTCGCCTATCTCCGTGCTCTTCTTCGATAATAGTGACAACGTGGTGCTGCGCCACTACGAGGACATGGTGGTGGATGAGTGTGGCTGTCGCTGACCACCCAGGACACCCTTTCAGGGACGGCCCCACGCGAAAAGCAGGGACCGTTTGTTCATGTTTTATTGGTGACAAAAAGC	208	244
NM_001008562.1	Rattus norvegicus LIM and cysteine-rich domains 1 (Lmcd1), mRNA	1699				0	-
NR_110637.1	Rattus norvegicus pregnancy induced noncoding RNA like (Pincl), transcript variant 2, long non-coding RNA	4802	CA	AG	CAACATCTCTGGAATAACTGTGTGAAGGAACTCTGCCAAGAGCTGGAATTGCAG	54	90
NM_001134974.1	Rattus norvegicus tripartite motif-containing 27 (Trim27), mRNA	2140				0	-
NM_001106848.1	Rattus norvegicus ring finger protein 7 (Rnf7), mRNA	1256	AG	CT	AGTTCATTATGCAATGCT	18	54
NM_001108326.2	Rattus norvegicus leucine zipper like post translational regulator 1 (Lztr1), mRNA	2779				0	-
NM_001107569.1	Rattus norvegicus Bardet-Biedl syndrome 1 (Bbs1), mRNA	3750	GA	CA	GAGAGGTGTTTCTGGGACCTGGGAAGTGACCCAAGAGGCAGATGCTGACAAGTGCCTATCAGAATGCACTTAGGTCCAGGAGTTCAAGATGGTCCTGAGGGTGGCATGTTTACTGTGCAGTGGCCAGAATATGCCTGAGACCACTGAAAAGGTACACAGCAGGGGTATGGAATAAAGCTGAAGACTAAAGGAAGATGTGTTTAGATCTCAAGTGCTGGGACCCCTGGCCCTCCAGACTATTCTGAATCACTTGGGAACCAGGAGCCCTGCTCCATGGAGAGCACATTTTTCTAGTCGAATCAGGTTCACCTGCTGTGTGGCAGCCAGCTCAGTCTTGCAGGCTTCCACCTCCTCTCCAGTAAAGACAGACGTTGGCCCGCA	381	417
NM_001032397.1	Rattus norvegicus transcription factor 21 (Tcf21), mRNA	1245	TG	AC	TGAGGGTGACGACCCCTGCCCTCCCCTCCCCGTCTCTGCTGCCGCCTTGCATCGCTCCTCTCCCTATCCCACCCCGCAAGAACAC	85	121
NM_001009976.1	Rattus norvegicus Spetex-2A protein (Spetex2a), mRNA	672	GT	GC	GTGAGGTTTCCCTCAGTGCCTTTTGGGTTCACAAACAGGCATGTTTCACCAGCTGCTCAAGCTAGTTCAGAAGGAGAGGGGAGACCAAGGAGAGACCAGAACGAGGCAGAAGAAAGCTGGCCTCCTGTCTTGGGTTATTCGGAAGGCATCATCAGAAAATTTCATCAGTAACCATGAAAAGCGTATAAAGAAATTGGAGGAAGTAAAATCTGAAATCCAGAAGTGTAAAATCGAGGGGGATGAACTTTCTCGAATCCTGGACCTTTATGTCAATGATGGTTTGAACTACAGGCTGAACATTGAATTGCCAATGC	314	350
NM_001106526.1	Rattus norvegicus angiopoietin 4 (Angpt4), mRNA	2331	GA	GG	GACACCAGAACCAGCTTATCTTGCACCTGAATTATGAGAGTCACTTGCCTCCCTGTGCCCCTCTAGTGTGAAATGCTGGGTGCTTGAGGCACCTGCCTCTGTGGGACCCATGCTCCTGCTGCATGCAGGGGCTCCCTGTCACGGTCTGAGGCAGACTGAACTTGACACCTCAGAGGGAGGGGTTGCAGCAGGCGGGGAAAATCTTGCAGACTGGGGTGCCCTCCTCCAGGAGCGTCTGAGAGACGATCCTATCCCCCTTTTATAATTTCAAGTTTCTCTAGCCTTGAGTTGTCTGAAGACTTCCTTCCAAGGCTGGTGAACACTGTTCCCACTTCCAGCCCCCCAGGGCTAGCCATTATTTCCCAGGGCTCTGTGGCTCCTGGGCTTCAATGACTGACA…	535	571
NM_001006975.1	Rattus norvegicus membrane-spanning 4-domains, subfamily A, member 6B-like 1 (Ms4a6bl1), mRNA	1404				0	-
NM_001107421.1	Rattus norvegicus Gfo/Idh/MocA-like oxidoreductase domain containing 2 (Gfod2), mRNA	2043	GG	CA	GGAGCTGACCTCTATGGGCAGAAGAACTCTGCTGCGCAGGAGGAGCTGCTAGTGAGAGACTCGCTGGCTGTGGGTGCAGGGCTTCCTGAGCAGGGTCCCCAGGATGTCCCACTGCTTTACTTGAAAGGTATGGTCTATATGGTTCAGGCCTTGCGTCAATCCTTCCAGGGGCAGGGGGATCGCCGTACCTGGGACCGCACCCCTGTCTCTATGGCTGCCTCATTTGAGGACGGACTGTATATGCAGAGCGTGGTAGATGCCA	262	298
NM_001107892.1	Rattus norvegicus LDL receptor related protein 6 (Lrp6), transcript variant 1, mRNA	5092	GA	AG	GACATGTAAATACACATCTGGTTGAGATCTGGAGGGGGGGAGGGAGCTACAGAAAAGAGTGAGGCAGACCTGTACAG	77	113
NM_001106419.1	Rattus norvegicus RAD1 checkpoint DNA exonuclease (Rad1), mRNA	1321				0	-
NM_001106702.1	Rattus norvegicus angiopoietin-like 6 (Angptl6), mRNA	1570				0	-
NM_001106164.1	Rattus norvegicus CKLF-like MARVEL transmembrane domain containing 3 (Cmtm3), mRNA	1519	GG	TC	GGCTCCGAGCCCTGTTGCCCGCACGCGCCTTCCTCTGCTCTC	42	78
NM_001135845.1	Rattus norvegicus RNA pseudouridine synthase domain containing 2 (Rpusd2), mRNA	3169	CT	TT	CTACCCAACACATCCTTTTCTGTTTGTTCTACTGATTGTGTCTCTCCTGGTGTGTGTGGAGTAATCTCTCATAGTGGAGTTTACTCTTTCTGTTGTGTTGTTTATTATATATTCTGGACATGAGGCCTCCCTCAACAACAAAAGAATTAGCAGCCCAATT	160	196
NM_001107599.1	Rattus norvegicus twinkle mtDNA helicase (Twnk), mRNA	3601	GT	GA	GTCATGCTGACTCAGTTTGCTGTGACACGGCTAGAAGAACAACTGGACAAGTATGAAGAGTGGGCAGACCGTTTTGAGGACCTGCCTCTCTATTTCATGACTTTCCACGGACAACAGAGCATCAGGTCTGTCATAGACACAATGCAACATGCTGTCTACGTCTATGACGTTTGTCATGTAGTCATCGACAACTTGCAGTTCATGATGGGTCATGAGCAGCTCTCTACTGACAGGATCGCAGCTCAAGACTACATTGTTGGAGCCTTTCGGAAGTTTGCCACAGACAATAGCTGCCACGTGACTCTGGTTATTCACCCACGGAAAGAAGATGACGACAAGGAACTACAGACAGCATCCATTTTTGGCTCAGCCAAAGCCAGCCAAGAAGCAGACAATGTT…	562	598
NM_001037794.1	Rattus norvegicus chaperonin containing TCP1 subunit 8 like 2 (Cct8l2), mRNA	1967				0	-
NM_001107799.1	Rattus norvegicus fat storage-inducing transmembrane protein 2 (Fitm2), mRNA	4462	TG	TG	TGATAGAGGCAGAATTGGGTTTGGGGACCTCATAGGACCATAGGACAAGGGCCACAGCCTAAGGGATTCTTACCTTTGGAGGTTATGATCATTTAGAAGTGAGATAAAATGTCTCCCTCTGACGCAGGAAGCCAGCTGGCATACAAAGCCACCCATGTTACATAGCGCCATGACTTTGGCCCCACCTCTTCTTCCTCATCTCACCAAAAGAACAACCTTAGGAGGCAGCGTTCAGTGGCCATGAGAGTCTTTCTTTGCAGCTCTTCCTGGCTGCTAGCCATCTCGTTCTGTCGCCTTCACCGTGACTGTCAGGATAAGAAGCCCTTTCACCCACATCCTACGTGGCAGGCCTCCAGTCTGATGAGAGGGCCCTTTCCTCTCCTGGGTAATCTCCTTACG…	486	522
NM_001108680.1	Rattus norvegicus ADP-ribosylserine hydrolase (Adprs), mRNA	1666	AG	TT	AGAGCTGGCAGCAGAGCTGTGAGGGCTATGAGGAGACAGATGTCCTGGCCCAGAGCCTACACCGAGTCTTCCAAGAGAGTCCCTGAGGGCCACAGCTTCAGTGGTACTGACAGAACCATCAGGACCCAAGGACGACTCAGATTGCAAACCATAGTTCCCTTAGGTTGACTCGCCCGCCCTGCATTCCTAGAGGGCAGGCTGAATTACCTTGGGGCTGGAGTCTTGGGACAGCCTGTGGAACAGAGAGGAGCTGGTACCTCCTTGGGGCTGCAACTCTGGCTTGCTGCAGGGCTGTATGACACCCCAGGATCCTCAGAAATATGAGGGACCAGGGCAGGTCTTATTTTGGAGGGGTATTTGGGGCACTCTTCTTCGTCTAGGTCATGAGACCTAGGAAGG…	435	471
NM_001107183.1	Rattus norvegicus Ro60, Y RNA binding protein (Ro60), mRNA	3737	CT	AT	CTATTGCCCTGCGGGAGTACCGAAAGAAAATGGCTATTCCTGCTAAATTGCTTGTTTGTGGGATGACATCAAACGGCTTTACGATCGCAGACCCAGACGATAGAGGCATGTTGGATATGTGCGGCTTTGATACTGCAGCTCTGGATGTAATTCGGAATTTCACGTTGGATGTCAT	175	211
NM_001109186.1	Rattus norvegicus cilia and flagella associated protein 141 (Cfap141), mRNA	636				0	-
NM_001109056.2	Rattus norvegicus Mab-21 domain containing 2 (Mb21d2), mRNA	3071	TC	CT	TCAGTAGGGTGAGTCTCTGCATTTGTCTAGTTCTCCT	37	73
NM_001109201.1	Rattus norvegicus Frey regulator of sperm-oocyte fusion 1 (Frey1), mRNA	430				0	-
NM_001108201.1	Rattus norvegicus ATP binding cassette subfamily C member 10 (Abcc10), mRNA	4859	TT	TT	TTTTCCTTCCGTAGAAGCCCACTTGCATTTTCATAATTTTATTTGATAAAATTCCTATCTTACATTCTGTGTT	73	109
NM_001008314.1	Rattus norvegicus makorin, ring finger protein, 2 (Mkrn2), mRNA	2234	GG	TT	GGTGTGAGTGCAGTAGTGAGTCCCCTTGGTCTCTTCATGATGAAATTTCCCTGCCCTGGTGAAGGGAAGGGAGATCACCAAGTCCATGGAATCACTACATTTAGATTTGAGAGCTCTGAGTTGTACCTCCAGCCCCTTTATCAGGGACCAGCTATGTGGTCCAGCTGTT	169	205
NM_001108127.1	Rattus norvegicus solute carrier family 36 member 4 (Slc36a4), mRNA	2973	GT	TG	GTTGGTACCACCCACAGTGGGTATATCCCTCCCACCTCGATCATCAATCTGGAAAATGCCCCCACAGGCTTGCCTGCAGTTCTGTCTTGCAGAGACATTGTCTTGATTGAGTCTCTTCCAAAACCACTCCAGATTGTG	138	174
NM_001399372.1	Rattus norvegicus testis expressed 46 (Tex46), mRNA	636				0	-
NM_001106763.1	Rattus norvegicus asparagine synthetase domain containing 1 (Asnsd1), mRNA	2360	AG	AA	AGGTGTTGATTCTATGGTGATCGCAGCCCTTGCTGATCGTCACATTCCTTTAGACGAGCCAATTGACCTTCTGAATGTGGCTTTTTTACCTAAACAAAAGGCAGGGCTGCCTATTCCTAACGTAGAAAGAAACCAGCAAAACCACTGTGAGATCCCTCCTGAAGAGTCCTCTCCGAGCACTGCTGTGCCTCAGGGTCCACATGACGCCGAGGTGCCAGATCGAGTCACAGGAAAAGCAGGACTGAAGGAACTACAGTCTGTCAACCCTGCTCGAACTTGGAATTTTGTGGAAA	293	329
NM_001134982.1	Rattus norvegicus protein associated with LIN7 2, MAGUK p55 family member (Pals2), mRNA	2658	CC	TC	CCGCACCCAGGCATTTTTATTGTGTAGATTGAAGTAACAGTGCACTAGGCGGAATTTTTATATAATTGTGGTTGGGAAGGTGTACTAATATATAATTTCTC	101	137
NM_001013922.1	Rattus norvegicus RAB5 interacting factor (Rab5if), mRNA	1045	AT	TT	ATGAAACATTGTCTTCCTTGGTTCTCCGTCAGGTGTACAGTTT	43	79
NM_001033997.1	Rattus norvegicus U-box domain containing 5 (Ubox5), mRNA	3686	TG	TC	TGGGGACATCAACTCCTCTCTCCTACACACCACCAGTGCCTGTTGTTCTTCAGCTTTGTGTGACACCAGGGTCTGTATGGACAGACCACCCCGCCTTGCCTGGTGGCTCCTGCACATCCCACTCTACGCCTCAGCCTCCCTTCTAGGTGTGTGTTCTTAGCTTGTGCAACTACAGAGGGCGTGGTTTGTGGCTCAGCCCCTACCCATAACCTGCCATGGTGTCCAGAATAGCCAGCCATGGTCTCCGAGTAGCCTACTTTCCTCTGTGTGAGTACTGGGAGCCATCCCTGCCCTCCACTCCCAAGAGCCCCCAAGTTACCTCTCTGCAGCTCTACCAGAGGTGCCTGGCCTACTCTGCTGGAAAACTAGGCCTGGGAGCCCCTGGTGTGGGCTGGAGAA…	457	493
NM_001399330.1	Rattus norvegicus testis expressed 48 (Tex48), mRNA	726				0	-
NM_001402485.1	Rattus norvegicus interleukin 17D (Il17d), mRNA	1215	CG	CT	CGGGGCGCTGATGAGACTGCCCGCCACGGTCCAGCTTCCTGCATCAGGTTCCCTGGCCCCCACAAAACCCACCCCACGATCCCTGGCTGTTGCCCACTTTTTTCGAAAAGACAGCTACATAAGCT	125	161
NM_001109238.1	Rattus norvegicus atonal bHLH transcription factor 1 (Atoh1), mRNA	2096	AG	CT	AGGACAGCAGCAAAACATCTCCCAGGTCCCACAGAAGTGACGGAGAGTTTTCCCCCCACTCTCATTACAGTGACTCTGACGAGGCCAGTTAGGAAGACAACAGCACCCTGAAAACTGAGACAACCAAAAGCCCTTCCCAGCGCGCGGGGAAGTCCCGCGACAAATATCCCTTCCACCACCCT	182	218
NM_001109217.1	Rattus norvegicus nucleoporin 42 (Nup42), mRNA	2435	GT	TT	GTGCAATACAGAAAGAGTGCTTTAGCCAGGCTCGCTGTGCAGCCTGCAGTCTGAGAGGCTGAGCACCCAGAACGCCTCACATTCAGGCCAGTGTGTTCAGCACAGAGTGGTAAGAGACCAGCAGCTCTGTGTGGGACCTTCAAAGAGAAAGATCTGATGGCTT	163	199
NM_001398920.1	Rattus norvegicus transmembrane protein 233 (Tmem233), mRNA	896	AA	GC	AAGGCAGGAGCTCACGGTGCAGACCCACCCACCGAAGCCATTGGTGGATGGGAAAAAAAAGAAAATGGCGTCTCCATGTCTCAGCTCAGCAAACTCTTTGCATCCATTCCTCCACTTCAGGGATGAACTCCAGAAACCTCGCTGCTTTTCACTGGGAGGTCTGGATTTGGGGACAGCGAGGGGAGCAGGTGGTTTTTAGGGAGAGCTGTGAATGCTGGTGTTTACAAAATTGAGTACAAATGCTGTAGCATGC	253	289
NM_001105936.1	Rattus norvegicus iron-sulfur cluster assembly enzyme (Iscu), mRNA	924	AG	TC	AGAAGCAGTGAGCCCTGAGGACGCTCCAGCCGCTCACAGCAGGCCTCCTGCCACCCTGCACATCAGAGAAGCTACGCAAAACGCACACTACTCACTGTTTGCACTATGGCTCTGATACAAGCAAAATGTGCCGTTGATTACGCCTAATCCTGTGTTCCTTTCAGCTCACGTGTGTCCTTAGTGCAGTTGATGTCTTGATTGAGTTTGTGACCTGGGACTGAAATCAGCACCAAAGTC	237	273
NM_001131000.1	Rattus norvegicus small integral membrane protein 11 (Smim11), mRNA	499	TT	AC	TTACGTCAATCACAAGTGAACCACAGCTGGCCCGCCATGAACTGGAAGGTTCTCGAACACGTGCCTCTGCTGCTGTATATCTTGGCAGCAAAGACCCTGATCCTTTGCCTGGCCTTTGCGGGAGTGAAAATGTACCAGAGGAGAAGCTTGGAAGGAAAACTGCAAGCTGAGAAGAAGCGGCAATCAGAGAGGAAAGAGAACTGAAGAGACCTTAGAGATTTTCCTATTCAAATGTCAGCTTGGGTGGACTCCAGCAGCGAAGAGAGAAGAAAGAC	275	311
NM_001007006.1	Rattus norvegicus dual specificity phosphatase 13B (Dusp13b), mRNA	1296				0	-
NM_001025678.1	Rattus norvegicus fukutin related protein (Fkrp), mRNA	2860	GA	AG	GAAGGGATAAACCTTTGCCATAGCTCACAGTTACAAAGAGCTTGCTGGGCCCAGGCATACACACGGAAGTGATAGCTGCTATTACATCCATTTATCAGGGAGAAAAACTGAGGCCAAAATGACAG	125	161
NM_001109629.1	Rattus norvegicus cilia and flagella associated protein 107 (Cfap107), mRNA	993	CT	AA	CTTTGTTTCAAGTTTCCCAAGCTTGGCAGAGTATCAACTACTACCCACTCATGAAGGGTAGATGAGGAGTTGAAGAATCTAATAACCTCCTAACGTCTCTCTCGTCCCTGAATCTGCCAAGGCAAAGAGACGTGGTATCGCTCCTGGTCATGTTTTCGACCTCAGTGGTTCCCGAGGCATTTTCCACTCCAGGCTGGCAGATTGAAAAGAAGTATTCAACGAAAGTGCTCGTTGGGAACTGGGTAGAAGAAAGAGGGAAGTTCACCAAAGCCACTGAGCACACACCTCAGTGCAATTACAGGATGGAATATATTCCCCTCCCAGACCACAGACCAGACTACATTTCTCGGTGGTATACAAAAAGGAAAATGGAGGGTCTCCCACACAATTACCTGATGA…	944	980
NM_001106204.1	Rattus norvegicus ring finger protein 217 (Rnf217), mRNA	1930	TT	AC	TTTTTCGGAGACCATACATCAAACCTCAGTATATTTGGATGCAAATATCGCTACCTCCCAGAGAGACCTCAC	72	108
NM_001108753.1	Rattus norvegicus bridge-like lipid transfer protein family member 3B (Bltp3b), mRNA	7056	AA	AT	AAATGGTGAGCTCCCGTGTGAGAGAGTGTGTGTGTGTGTGTGTGTGTGTGTGTGTGTGTGTGTGTGTGTGTGTGTGTGTGTGGTGTTTAT	90	126
NM_001108141.1	Rattus norvegicus DS cell adhesion molecule-like 1 (Dscaml1), mRNA	6929				0	-
NM_001109605.1	Rattus norvegicus tektin bundle interacting protein 1 (Tektip1), mRNA	642				0	-
NM_001109084.1	Rattus norvegicus golgi associated RAB2 interactor family member 4 (Garin4), mRNA	2181	AC	CA	ACCCTCTCCACTGCCAGCTCTGTCTCTACGAACAAGAGGATGGGCAGAATCAGCTTGTTCCTGAGAAACATCAGAGCCAACCTGGCCGCAAAAGGCCTGGCACCACAGCGTGGCCAAGACATAGACATCATATCCAAGACATTGGAGAAAACCGATGTGAACGCCGTCATGGAGACAGAGGATGGCCAGGGCCTGGAAATCATTGATTCCGTGACATCCGAGGTCATGGAGACAGTGACCTTTGAAGCTCA	251	287
NM_001108466.1	Rattus norvegicus N-acetyltransferase 14 (Nat14), mRNA	1519	CT	TG	CTCGTGGTCCCAGTGGCTGTGGCCGCTTGGGGTGTGTCAGGGTTATTGGAGGCCTGTGGCTACCAGGCAGAGGGAGGCTGGGGCTGCATGGGCTATATGCTGGTTAGGGAATTCAGCAAAGACCTGTGATTGGAGACTATGCCCATTGGGTAGATGGGCAGAGAACCAGCACCTAAAGAACACCTACTGTGTGCCGTGCACTTTACATCCCCTCCCGCAGTGTCCACCTAGTCTGCTGGGCTGATAGTGAGGCACCAAGGTTGATGGACTTACATGCTCACAGTGGACCTGCCAGATGCAATGGGGACTCTAAACTCAAATAGAACAAATTCCTTCTTGGTCTTCTGGGACCACTAGAAGTCGCCCTGTTCACTTCTCCCCCCCCCCAACCCCCAGCCC…	643	679
NM_001077660.2	Rattus norvegicus upregulator of cell proliferation (Urgcp), mRNA	3492	TG	GC	TGTGTGGAGCACTCCGACCCTCGCCCAGGAAGCGCTCCTCAGTCACCGTCTGTGGTTCCAGCACTCTGTCATCCTTCCTCAGAACCTCACTGCACATCGTCACCCGTGTTACTGTCTGCCCCTAGACTGTGAGCCGTTCCAGGGCAGGGCTGAAGCTCTCGGTCCCCAGGGCCTGGCACACATAGGCGC	189	225
NM_001109065.2	Rattus norvegicus mitochondrial translation release factor in rescue (Mtrfr), mRNA; nuclear gene for mitochondrial product	1209	GA	AG	GAATAATGGTGACATTGCCTGGCTACAGCATGGAAACCTCTAGAGAGTGCATTCTGGAGCTCAGCATGGTGGTGTACACCTGCCATCTGAGCACTTGGGAGAGCTAAGACAGGAGGATTGCTGCAAGGTTCCGAACAACCTCATCTACATAGCTGGTCCTGTGGCAGCCTTCCCTTCTCGGTGAGACTCTGAAAAAGGTGGGAGCCACAGGGTTGGTTGGTTTAGCAG	228	264
NM_001024969.2	Rattus norvegicus trafficking protein particle complex subunit 14 (Trappc14), mRNA	2506	GA	CT	GAGGGCTCCTTGTTCCTAAGCTGCGCCTCCCACTGTGGGCAGAGAGGCCTTGCTAGGCTGCCTGTCTGTGTCTGCTGGTGAGGGATGAGAGGCAGAAGCTGTGAGACTGCAGTCTGGTTGCAGCTCAGCCAACAGTATTCCCTAAGTTCTTGGGGGGCGGGGGGGCTGGCCCCACCCCAGCAGGGCAAAGGCTGCAGGAGCTCCTTCGCCCCGATCCTTCATGTCGTCCCGAGTTTACAGAGTATTCTCTCTCATTCATGTCCAATCCTCTCTGCCGCTAAAATTCCTTTGCACCCACCTACAGGGCCAAGATTAGAGGGTGGTAGTGGTAAAGGGACCCACGACAATGACAATGACTCTCCTGTCTCAGGGGTTGGGGACATAGCTAAGTGGGCCTCT…	437	473
NM_001107743.1	Rattus norvegicus solute carrier family 43, member 3 (Slc43a3), mRNA	2030	AG	CC	AGAGCAAAGCTGTATATGTGTCGATGGGGCTTGCCATTTTTCTGACATTGGTCCATCCCTTTCTGGTGTACCGTGAGTGCCGTGTTGAGAAGACAAAACCATCAGTGGACGCCTAGCCCAGAAGCCCTCACTCTCTAGCCTTGAAGATGCCTTTCTTGCTCTTTAGTCGACTTTGATGATGCAGTGTCCACAAAGACTGCCTACCTAGGAGAACTGTCATAGGCAGCCATAGTTTTCC	238	274
NM_001106548.1	Rattus norvegicus family with sequence similarity 209 (Fam209), mRNA	640	AT	CT	ATTAGACAGAATCTTCCAGAGAATGCCCAAGGCTGGCTTGGGAACAAATGGCTCTGGCTGTTCATTGTCATTATGATCTATGTGTTGCTGAAGTTTCGAGGAGACGGCGAAAAGAACAAGGAGCAGAATCCTACTAGCCTCCGAAGCTCCCAGTTCCGCTCTCCACCAAAGAAAGCCCAAAGTATTTCCCCCAGCAAAGACTTCACTTTCAATACT	216	252
NM_001107870.1	Rattus norvegicus SMYD family member 5 (Smyd5), mRNA	2192	CC	TA	CCTCTTCGTGCTTCAAAGCTGCTGCAACCACAGCTGTGTCCCCAATGCGGAGACCTCCTTCCCAGAAAACAACTTCCTTTTACACGTCACTGCCCTGGAGGATATTGAGCCAGGCGAGGAAATCTGTATCAGCTACTTAGACTGCTGTCAGCGGGAGCGCAGCCGCCATAGCCGCCACAAGATCCTCAGGGAGAACTACTTGTTCGTCTGTTCCTGTCCCAAATGCCTGGCAGAGGCTGATGACCCTAACGTGACCTCAGAAGAGGAGGAAGAGGAAGATGAGGAGGAAGGAGAGCCAGAAGATGCAGAACTAGGGGATGAGATGACTGATGTCTGACGTCACCTTGCCTGGAAGGGGCCCTGCCCAGACCCTGCTGGAAAGGGGGCCTGTCCTCCACA…	711	747
NM_001113543.1	Rattus norvegicus WT1 associated protein (Wtap), transcript variant 2, mRNA	1686	GC	AG	GCACGGTGACCGAGGCGGCGCCCGAGAGGCGCGTCTCGGGGTACAAGATGACCAACGAAGAACCTCTTCCTAAAAAGGTCCGACTGAGTGAAACAGACTTCAAAGTTATGGCACGGGATGAG	122	158
NM_001105903.1	Rattus norvegicus mucolipin TRP cation channel 1 (Mcoln1), mRNA	2070	AG	CT	AGGACCATTCACTGCTGGTGAACTGATCCAAGATGATTGCCACTAGACTTTATCCCCATGTACTGCTGGGACCCCAGCTTATTTATTTTTAGAATTCGCT	100	136
NM_001013181.1	Rattus norvegicus zinc finger and BTB domain containing 16 (Zbtb16), mRNA	2306				0	-
NM_001100757.1	Rattus norvegicus protein inhibitor of activated STAT, 4 (Pias4), mRNA	2431	GG	AT	GGCCCTGGCCAGCCACACGGCACTCTTTTCTAATATTTGTATTCTAAT	48	84
NM_001113544.1	Rattus norvegicus WT1 associated protein (Wtap), transcript variant 3, mRNA	1620	CG	AG	CGGCGGCGCGGCCTCGGCCTGTGTGACTGGCGGCGCCCGCGCAGCCTCGGGCTGGGAAGGGTACAAGATGACCAACGAAGAACCTCTTCCTAAAAAGGTCCGACTGAGTGAAACAGACTTCAAAGTTATGGCACGGGATGAG	142	178
NM_053934.3	Rattus norvegicus protocadherin alpha 13 (Pcdha13), mRNA	5300	AA	TT	AATATCAGCTCATAGAAAGTAATAAAATTTGCTGTTACCATAAATAAGACATT	53	89
NM_147139.2	Rattus norvegicus integrin subunit beta 5 (Itgb5), mRNA	3696				0	-
NM_001013427.1	Rattus norvegicus retinoic acid receptor responder 2 (Rarres2), mRNA	765				0	-
NM_001107446.1	Rattus norvegicus PDZ domain containing 8 (Pdzd8), mRNA	7183	CC	GG	CCTCGAACTCAATAGAGCTCTGCCTGCCTCTCTTCTGGAGTGCTGGGG	48	84
NM_001101013.2	Rattus norvegicus autophagy related 4D, cysteine peptidase (Atg4d), mRNA	1957				0	-
NM_145672.4	Rattus norvegicus C-X-C motif chemokine ligand 9 (Cxcl9), mRNA	554	AG	CT	AGTCAAAGAAGACTGCATAAGAGACCACTTTACCAACAAGCGCTCTGCATCTAAACGGCTTTTAGATCATACTAAAACGCCTTCCCT	87	123
NM_001108471.1	Rattus norvegicus ubiquitin-conjugating enzyme E2M (Ube2m), mRNA	1963				0	-
NM_001108625.1	Rattus norvegicus serine protease 37 (Prss37), mRNA	1052				0	-
NM_001106878.1	Rattus norvegicus Cd70 molecule (Cd70), mRNA	827				0	-
NM_001108077.1	Rattus norvegicus actin-like 9 (Actl9), mRNA	1378				0	-
NM_001108041.1	Rattus norvegicus acyl-CoA thioesterase 3 (Acot3), mRNA	1964	TG	AT	TGGGCATGAGCACCAAACGAATCAAGAGGATCAAAGATGGCCTCAAAGACATTGTGGATGCCCTGAACAATCCTCTGGAAGGAGCTGACCAGAAGAGCTTGATCCCTGTGGAAAGGTCTGACACAACCTTCCTGTTCCTCGTTGGTCAGGATGACCACAACTGGAAGAGCGAGTTCTATGCCAGAGAGGCCTCCAAACGCTTGCAGGCCCATGGGAAGGAGAAGCCCCAGATCATCTGTTACCCAGAGACAGGCCACTATATTGAGCCTCCTTATTTCCCCTTGTGTAAGGCTTCCCTGCACAGCCTGGTGGGCGGTCCTGTCATCTGGGGAGGGGAGCCCAGGGCTCACGCCATGGCCCAGGTTGATGCTTGGCAGCAACTCCAGACTTTTTTCCACA…	450	486
NM_001127497.1	Rattus norvegicus acylglycerol kinase (Agk), mRNA; nuclear gene for mitochondrial product	2228	GA	TT	GAGAAAGTGTT	11	47
NM_001108701.1	Rattus norvegicus CCAAT/enhancer binding protein zeta (Cebpz), mRNA	4004	GT	GC	GTGCCATGC	9	45
NM_001135712.2	Rattus norvegicus transmembrane protein 185A (Tmem185a), mRNA	2554	AA	AG	AAGGAGTGTCGGAGACAGTTGGTTGCTCTGGCTTCTCCCGTGGCGGCGTTGGCGACAAGGCTGCCTTTAGCAGCATGAACCCGCTGTGAGGCGCAGGCTTCGCGGCGCGGGGGGGCGGGGGGAAGAGGAGGACGTCTAGGCGAAGTTCTCCGCCATGAACCTGAGGGGCCTCTTTCAGGACTTCAACCCGAGTAAATTCCTCATCTATGCTTGTTTGCTGCTGTTCTCTGTGCTACTAGCCCTTCGTTTGGATGGCATCATTCAGTGGAGCTACTGGGCTGTCTTTGCTCCAATATGGTTATGGAAG	307	343
NM_001048044.1	Rattus norvegicus CDC42 effector protein 3 (Cdc42ep3), mRNA	1926	CT	TT	CTCCCTGCTCTCCCTGCAGTTGGATCTGGGGCCCTCACTTTTGGATGAAGTCCTGAATGTCATGGATAAAAATAAGTAACCAGGAGTCAGCCCTTTTTCTTGGGAGTAAGAGGTACCAAAATAAGCAGAAAACAAAAAATCATCTAACCACAGCCGAAGAAAAGAGCTGCTCTGACTGTTTTTATTTGCAGCCATGTGGTGCATTTTTCTAAAATAACACTCCTGTTCGTACAAAATATTTTT	243	279
NM_001109408.1	Rattus norvegicus arrestin domain containing 5 (Arrdc5), mRNA	1014	GC	CT	GCTCCCCATAATCATCACCAGTGCCAGGGAAGACAAGGCCAACTGTCCCCAGGTGAATGAGTTACCATATGAGGATCATCTGGTTTGAGTGCCTGAACT	99	135
NM_001079709.1	Rattus norvegicus acyl-CoA thioesterase 5 (Acot5), mRNA	1888	GT	TT	GTGCGCGCCACGCTCTTCCTGCCTCCAGGAACTGGACCCTTTCCTGGAATCATAGACCTTTTTGGAATTGGAGGTGGACTTCTGGAATATAGGGCGAGTCTGCTGGCTGCAAAGGGCTTTGCCGTCATGGCTCTGGCTTATT	142	178
NM_001010970.1	Rattus norvegicus amylase alpha 1 (Amy1), mRNA	1639				0	-
NM_001107855.1	Rattus norvegicus aarF domain containing kinase 2 (Adck2), mRNA	2508	GC	CT	GCAGTTTTCCTGGCTGTAGCGATGGGACAGGGCCACAGAGTGGCTGAGCTCATGCTGCATCATGCCCAGGCCAATGAGTGCAAGGATGTGGAAAAGTTCAAGGCTGAGATGGCTACACTGGTGACCCAGGCCAGGAAGAACACCCTCACACTGGAAAAGCTTCATGTTTCCAGCCTCCTGTCCAGTGTCT	190	226
NM_001007627.1	Rattus norvegicus StAR-related lipid transfer domain containing 6 (Stard6), mRNA	1297	CT	CA	CTATGTGTGCTCCCCTCTCAAGGAAAACCCAGCATATTCCAAGCTAGTGGTGTTTGTCCAGACAGAAATGAAAGGAAAATTGCTTGCCTCAGTAATTGAGAAGTCTATGCCTTCCAACTTAGTAAGCTTCTTCCTCAATGTGAAAGACGGCCTAAAGATACACAAAGCCCCAATCCCAGCACTTCGTTCACATCACAGTATGCACTCCGCTGTACACAAAAAGAAATAAAGCTATGCTGCCA	242	278
NM_001108411.1	Rattus norvegicus TBC1 domain family, member 7 (Tbc1d7), mRNA	1366				0	-
NM_001013132.2	Rattus norvegicus F-box protein 16 (Fbxo16), mRNA	1371	AG	TT	AGCCTTTGCCGTTGTGCACAGGTGAGCTGGTACTGGAAGAGCTTGGCTGAGCTGGACCAGCTCTGGATGCTCAAGTGCCTGCGTT	85	121
NM_001318118.1	Rattus norvegicus zinc finger protein 36, C3H type-like 3 (Zfp36l3), mRNA	3330	TT	GT	TTTGTTTGTTTTTTTGTCTTGGTTATTATTTTCATTATTATTATGAAGT	49	85
NM_001100704.1	Rattus norvegicus exostosin-like glycosyltransferase 2 (Extl2), mRNA	2016	TA	TG	TATCTACAGTTACGGAGGCTTTGAGCTGCAGACTCCTGGGCTTGGAAACGGCGACCAGTACTCCATGGTGCTCATCGGAGCCTCCTTCTTCCACAGCAAATACCTGGACCTCTTCCAGAAACAGCCTGCAGCCGTCCACACGCTGATCGACGAGACCCAAAACTGTGACGATATCGCCATGAACTTCATCGTCAGCAAGCACACTGGCAAGTCTTCAGGGATATTCGTGAAACCTATAAACATCATCAATTTGGAGAAAGAAACCAACGGTTATTCAGGAATGTGGCATCGGGCAGAGCACTTTCTGCAGAGATCCTACTGTCTGAATAAGCTTG	335	371
NM_001100568.1	Rattus norvegicus F-box and leucine-rich repeat protein 3 (Fbxl3), mRNA	3301	CC	TT	CCCAGAGTTCCACGTCAAAGGCAACTCTGAGAACATTTTACCCTTACTGAATAGTAGGGAGCTCTGGCTGTATAGGAAATACTTGTGCTAGTTGGTTAGGTTCTGGGTTATTTTTT	116	152
NM_001106812.1	Rattus norvegicus V-set and immunoglobulin domain containing 2 (Vsig2), mRNA	1175	CT	TG	CTCATTCTCACCAATCTCTCCCTGACCTCCTCTGGTACCTACCGATGTGTAGCCAGCAACCAGATGGGCAGTGCCTCCTGTGAGCTGAACCTCTCTGTGACTGACTCATCTGAAGGCCGAGTGGCTGGGACTCTGATTGGGGTGCTCCTGGGTGTGCTGTTGCTGTCGGTTGCTGCATTCTGCCTGATCAGGTTCCAGAAAGACAGAAAAAAGGAGCCCAAGGAGACATATGGGGGTAGTGACCTTCGGGAGGATGCCACCGCTCCTGGGGTTTCTGAGCAAGCTTCTGTGAGAGCAGACTGTAGCAAAGGGCTCCTGGAGAAGTCTCCAGCTGCCAGCACTGTGACCACCACCAAATCCAAACTCTCTATGGTTGTCTGATTTCTGATCGCTGACGGT…	413	449
NM_001014251.1	Rattus norvegicus FUN14 domain containing 2B (Fundc2b), mRNA	2275	AT	GT	ATAAAATCTTCATATTTCCACCAGAGGGGAATAGAGAACCCATACAAATTCAAAATAACAACAAACCATACCAAAACAACAGACTCCATAGACCTGAGGAACCACTTGTTTATAAGCCAACTGGCTCTTTACAGTGTGT	139	175
NM_001108716.1	Rattus norvegicus DDB1 and CUL4 associated factor 4 (Dcaf4), mRNA	2023				0	-
NM_001126375.1	Rattus norvegicus proline rich 22 (Prr22), transcript variant 2, mRNA	1766	GG	AA	GGAAAAAACCGAGCACATCCACCAAGAAAGGGAAACCAAGCGGTAGACACAGGCAGGCCACTGGCCTTGCTGGCACCACTGCCACAGGACCCAGGCTGGACCCAGGAGCCACCCCCAA	118	154
NM_001024299.1	Rattus norvegicus zinc finger protein 458 (Zfp458), transcript variant 2, mRNA	3293	GA	AT	GATGTGATGTTGGAGAATTACAGCAACCTTGTGTTCCTGGGTCTTGCTTCCTCTAAGCCATACCTGATTACACTTCTGGAACAAATAAAAGAGCCTTCAGATATGAAGAAACGAGAGGCTATCACTCTGCACCCAGGGGGAAAATGCTATATGTGCGAAGAATGTGGCCAAGTCTTTGAGTGGAAAAAAGTACTTCAGAATCACCAGAAAATTCAT	216	252
NM_001108223.1	Rattus norvegicus src homology 2 domain-containing transforming protein D (Shd), mRNA	1459	GA	AA	GAGAACCAGGTGGTACTAGGACAGCACAGTGGGCCCTTCCCCAGCGTGCCTGAGCTGGTCCTGCATTACAGTGCCCGCCCACTGCCTGTGCAAGGCATTGAGCACCTGGCTCTGCTCTACCCTGTCACCAGCAGCCAGAGCTCTCAAGGACCCTGCACATTGGCTGCTAGGCCAGAGAAGGGACAGGGGGACCCATGACATACAGAAAGGCCCTGCTGCCAGACCTGCTGGGTTCAACTGTGGAATCCACATGGTGGCAGCTGAAAGCTGCAAGTTGACCTCTGATTTACAAACAAGTCACAGGCCATAAA	311	347
NM_001105668.1	Rattus norvegicus MyoD family inhibitor domain containing (Mdfic), mRNA	3418	CT	GT	CTGGGCTCCCCAGCCCACGAAGAGTGTAATGAAGACACTACCGAGAAAGAAAAAAGACAAACTACCAGTAGCCACACTAGGTGTGGGCTGATTCGGGACCAGTCCATTTGGAGAAATCCTTCAGATGGCGAACTTGTCAGAACCCAACCTGAGCGTCTGCCTCAACTGCAGACATCAGCACAGGAGCCCAGCAAGGAGGAAACCAGCAAGATACAGAATGGTGGCCACACAACTATGAACAATGGGAATGGAATTCCTCACAGAGCCAAACATATGTCTATGGATAATCACAAAATGTCATCTCCTGTCTCTCAGAAAATGCATAGAAAAATTCAGTCCAGCTTGTCTGTAAACAATGACGTCAATAAGAAGAGTAAAGTAAATGCTGTCTTTTCCCAA…	780	816
NM_001128192.1	Rattus norvegicus potassium channel modulatory factor 1 (Kcmf1), mRNA	1614	CA	TG	CAACAACTGGAGACTGCTCGCAACGCAAGTCGGCGCACTAACACAAGCAGCGTCACCACTACGATCACACAGGCCACGGCCACAGCCAACACAGCCAACACAGAGAACAGCCCGCAGGCCCTCCACAACTCCCAGTTCCTG	141	177
NM_001109460.1	Rattus norvegicus syntaxin 19 (Stx19), mRNA	1180				0	-
NM_001109086.1	Rattus norvegicus macrophage immunometabolism regulator (Macir), mRNA	2797	CT	CT	CTCCCAGCTTACTGCATCAATCCAAGTTTTTGGTGGCTGGAAAGTTTCTGCTGTTTCTACT	61	97
NM_001106429.1	Rattus norvegicus poly(A) binding protein, cytoplasmic 4-like (Pabpc4l), mRNA	1458	AG	GC	AGGCAGCTGCTAAAGCAATGGCTGAGATGAATGGCCGCATCCTGGGCTCCAAACCCCTCAACATTGCACTGGGTCAGAAGCACTGAACACAAAATGATCCTACCTCACAATCTGAGCAGCAGCTAGGAGAACAATCCTGCTCTCCATCTATCAGGTGCTAGAAGGAAGGGTAATCTTCAAAACCCCAGTGGCTGC	195	231
NM_001009717.1	Rattus norvegicus leucine-rich alpha-2-glycoprotein 1 (Lrg1), mRNA	1326				0	-
NM_001100998.1	Rattus norvegicus retrotransposon Gag like 8A (Rtl8a), mRNA	1237				0	-
NM_001107718.2	Rattus norvegicus cell division cycle 14A (Cdc14a), transcript variant 2, mRNA	2613	CT	AT	CTAGCCAGTTCCCTGGGGAACTTGAATTCTGGGACAGAAGAAACTGAGAACAAAAAGACCACATCACCCATCAAGGCTGCTTTCATAGCCAGCCCGTTCACCAGCTTCTTGAATGGCAGCACCCAGACACCTGGCAGAAACTACCCTGAGCTCAACAACAATCAGTACACCAGAAGCAGCAACAGCAGCAGCGGCGGCAGTCTTGGGGGCAACCTGAACAGCTCTCCAAGCGCCAAGCCCGAGGAGCATAACACCATCCTTAGACCTTCCTTCTCGGGGGCGCTCTCTTCCTCCTCAGTGAGATTCCTGAGCCGTTCTATACCTGTAAGTTCACAGACACCACCTCTCAGTCCTCAGAACCCTGAATGCAACTTCTGTACCTTGCCTTCCCAGCCCAGG…	415	451
NM_001024878.1	Rattus norvegicus zinc and ring finger 4 (Znrf4), mRNA	1214				0	-
NM_001106005.1	Rattus norvegicus glucosamine-6-phosphate deaminase 2 (Gnpda2), mRNA	1825	AC	AG	ACTATTTTTGTATGTGACGAGGATGCTACTTTAGAG	36	72
NM_001408961.1	Rattus norvegicus mast cell protease 4-like 1 (Mcpt4l1), mRNA	741				0	-
NM_001106595.1	Rattus norvegicus SET and MYND domain containing 1 (Smyd1), mRNA	2146	GC	AT	GCCCTGGGCAAGATCTCAGAAGGTGAGGAGCTGACGGTGTCCTACATAGACTTCCTCCACCTCAGCGAGGAGCGCAGGCAGCAGCTGAAGAAGCAGTACTACTTTGACTGCTCCTGTGAACACTGCCAGAAGGGGCTGAAGGACGACCTCTTCCTGGCAGTGAAGGAAGACCCCAAGCCCTCCCAGGAGGTGGTGAAGGAGATGACACAATTCTCAAAGGATACACTGGAAAAAATAGACAAGGCTCGCTCTGAGGGTTTGTATCACGAGGTTGTGAAGCTGTGTCGGGAGTGCCTGGAGAAGCAGGAACCAGTGTTTGCTGACACCAACCTCTACGTGCTTCGGTTGCTAAGCATTGTGTCAGAAGTCCTCTCCTACCTCCAGGCCTTTGAAGAGGCC…	922	958
NM_001107251.1	Rattus norvegicus Fez family zinc finger 2 (Fezf2), mRNA	2072	CT	TT	CTT	3	39
NM_001109334.1	Rattus norvegicus ring finger protein 225 (Rnf225), mRNA	2286	CC	CC	CCAGTCCCCGAGTGTCATCTACACAGAACTGTGTCAGGGCACTGTAGCCTTGATCTTGATGGAATGCTGTTAGGAGTACTTCGAGTTATCACCAGCACGGCCCCCAGCTGGAAACAGTACTGGCCAGCTCTGGGGGCGCTGAAGGTCACTACAGGGCCTTGGGGCGCCCATCTTGGGAGCACAAAACAGCTGTTCTGATCATGTGTCTTGCTTCCAATAGCTAGTGTGTAAACTTCAGCACCTGCACACCTGACGAAAATTCCAACTTGGAGGGGCAAGTGTGGCCTGGCTAGGGTTAGGGAGGGCCCTAACTTCTGGAGACTAGCTCCCATTTGAGAAGTAAATCCCAAACTGATCTGAGAACTTCGACTTCTCCTCTGGACTTTGGTCTCTGGATCT…	863	899
NM_001109241.1	Rattus norvegicus atonal bHLH transcription factor 8 (Atoh8), mRNA	2375				0	-
NM_001107478.1	Rattus norvegicus zinc finger and BTB domain containing 45 (Zbtb45), mRNA	2197	TG	GC	TGTGCGAGCCTTCCAGTGTGCAGTGTGTGCCAAGCGCTTCACTCAGAAGAGTTCACTCAACGTGCACATGCGCACACATAGGCCTGAACGTGCGCCCTGCCCTGCCTGTGGCAAAGTTTTCTCACACCGTGCGCTGCTAGAGCGACACCTGGCAGCTCACCCTGCACCTTGATTGGGAGCCAGCTTCACACAGCTGACTGATGCTGTCACATGCCTTGGACTAGGTCTACTCCACCAGAAGTCTCTGGAGTATGGACCCTTTCCCTTCCCCACCCTGACCCTGTTCTCCCCTGTGGACTTGGGACCCAGAATCCTATTTCTTTCCTACACTTGC	334	370
NM_021747.1	Rattus norvegicus acrosomal vesicle protein 1 (Acrv1), mRNA	827	GG	TG	GGAGCACACTTCAAGTGAACAACTTACAACTGAACAGTCCTCAAGTGACCAGTCTTCTGATGTATCTTCAGGCGAACAAGTTTCAGGTGAAAAGCTTGAAGAGGCAGGTGAACAGGTGTCTGGCGAAGACAAAGGAAACGAAGTTATAAGTACACCACTTCCAAGCACGTCTTCAGGTGGGATAATAAATTGCCACACATGTGCTTATATGAATGAAGATGCAAAATGTCTCCGTGGAGAAGGAATATGCACCACTCAAAATTCCCAGCAGTGCATG	277	313
NM_001109222.1	Rattus norvegicus protein phosphatase 1, regulatory subunit 3A (Ppp1r3a), mRNA	7529	AA	GG	AAGTTGTTTTCAAAAGTTCAGAAATAATAAAATCAGGTAGTGGAGGAGAGCAAGGAGTGGGTCCGATTCTCCAACAAAAAGAAGGTAGTTTGGAAAAATCCCAAGACCCGATGATTTCAATCAACGAGCCTCTTGAGAATCTGGATGAAGTACGTTCTGAAAATGAAGGG	170	206
NM_001012109.1	Rattus norvegicus polypeptide N-acetylgalactosaminyltransferase 14 (Galnt14), mRNA	2310				0	-
NM_001085406.1	Rattus norvegicus MPN domain containing (Mpnd), mRNA	1566				0	-
NM_001024318.1	Rattus norvegicus ankyrin repeat and SOCS box-containing 4 (Asb4), mRNA	1509	TA	AG	TAAAG	5	41
NM_001108410.1	Rattus norvegicus CD83 molecule (Cd83), mRNA	2119	GT	CT	GTTGACTAAACTGGATGTGAAGATGCTTGGGGATAGCTGAACGTAATGGATATAGTGGCAATTCTACTGGGCTGTTCCTTTGTTGATATTCTAGAGTTCTGGAGCTGAGCAAATGCCTGTCATAGCTCAGCTTTCCCGTCATTCCAAACAAACAAAGGAGGCCTCGAAATGGACATTCGCATGGTCTTCTGTGTGAACTCCCAAGAAACGTCGAGACTGGCGCAGTGTTTTGCTCTTGAAGGACTAATCACAAGTTCTTGAAGATATGGACCTATGGGAGCTATTGTGCCATGACAAGAGGAACTTCTCAGATGCTGCACTGATATGACATTGTTGCATTTCT	343	379
NM_001013941.1	Rattus norvegicus stratifin like 1 (Sfnl1), mRNA	1299	AG	AC	AGGAGGCCATCTCACTTGCCAAGACCACCTTCGACGAGGCCATGGCCGATCTGCACACCCTCAGTGAGGACTCCTACAAGGACAGCACCCTCATCATGCAGCTGCTGAGAGACAACCTGACGCTGTGGACAGCCGAAAATGCTGGGGAAGAGGGTGGCGAGGCTCCAGAGGAGCCCCAGAGCTGAAGCAGCCTACATCCTCCCTGTCCCGCCTTGCCCTCCAGTCCCCAGCCTGCAGAGAGGAC	244	280
NM_001035221.1	Rattus norvegicus yippee-like 5 (Ypel5), mRNA	2144	GT	AC	GTCTCTGCTTAGGTCATTATTTCACATCTTTCCTTAGAAGTTCAGCTACTGCATTTCAGCTGGACCCGATACCACCCCCTATTGGAAAGAGGTCAGATTGGACTCAATTTCAGCCCTAAATTTATGACATTACAAAGTATTAGAATATGCTTCTTTATCCAAACTGTTTCTAGGCAAACTGATCCTTGCTTTTGGTGAATTAGACAGGACAGGGAAATCAGCTAGTTATACAAATGAGTAGATGGATATATGTCTGCTCAGTTTCCAAGTCATCTATGAAGGAAATTTGCCTGAGTTGAACAAGTGACACTGTCATTGGCACTAATGTGATTTGTGCTTACAGTCATCACCATAGCTCTGCACTCTTGGTCAGCGGCATGGCTGTCTGGAGCAGTGGAA…	463	499
NM_001109242.1	Rattus norvegicus JNK1/MAPK8 associated membrane protein like (Jkampl), mRNA	1101	AG	GC	AGGCCTCTTATATTATGCCTTCCCATACATTGTATTGGTGACATCTTTGGCTAATCTGGCTGTATATCTGGTTTTTGTCAAAATAGAGAGCTACAGTGATCTGATGAAAAAGGACAGACTTCTTGTCCTCTTCAGCCACTGGTTTCTTCACGCCTATGGC	160	196
NM_001109673.1	Rattus norvegicus YJU2 splicing factor (Yju2), mRNA	2096	AA	TC	AACTAGCATGTATTTGCCACTGGAACAAACAATGGGTTTTTC	42	78
NM_001025659.2	Rattus norvegicus dynein axonemal assembly factor 11 (Dnaaf11), mRNA	1698	AC	CT	ACTTTGATTACAGAAGATGGGAAGGTCCTGAATGTGAATGAAGCCAAACTTGATTTCTCCTTGAAAGATGATGAGAAACACAACCAGATCATCCTGGACCTGGCTGTCTATAGGTACATGGACACCTCT	129	165
NM_001100172.1	Rattus norvegicus potassium channel tetramerization domain containing 8 (Kctd8), mRNA	2840	AA	TT	AAAGCCCCTGTTCAGTGGATGCCGCCACCAGACAAGCGCAGAAACAGTGAACTCTTTCAGTCACTCATCAGCAAGTCCCGAGAGACAAATCTCTCCAAAAAGAAGGTCTGCGAGAAGCTAAGTGTGGAAGAAGAAATGAAAAAGTGTATTCAGGATT	157	193
NR_133655.1	Rattus norvegicus antisense transcript of iNOS gene (LOC106736471), long non-coding RNA	572				0	-
NR_148404.1	Rattus norvegicus lncRNA derived from hepatocytes (Lnc-hc), long non-coding RNA	1410				0	-
NM_001106299.1	Rattus norvegicus alpha hemoglobin stabilizing protein (Ahsp), mRNA	557				0	-
NM_001130988.1	Rattus norvegicus stem-loop histone mRNA binding protein (Slbp), mRNA	1703	CG	GT	CGGTCATGGGACCAGCAGATCAAACTCTGGAAGGTGGCTTTGCATTTTTGGGATCCTCCTGCTGAAGAAGGGTGTGATTTGCAAGAAATACAACCTGTAGATCTTGGGGAAATGGAGACAGAATTCACAGAAAGCAGCTCTGAGTCCCAGACAAGTTCACAGGATAACTTTGATGTATATGCTGGCACACCCACCAAAGTCAGACATGTGGACTGCCAAGTGGAGGACGAGTTTGATTTGGAAGCTTGT	249	285
NM_001105879.1	Rattus norvegicus Rho GTPase activating protein 31 (Arhgap31), mRNA	4566				0	-
NM_021670.1	Rattus norvegicus bone morphogenetic protein 15 (Bmp15), mRNA	1441				0	-
NM_001423912.1	Rattus norvegicus IQ motif containing F2 (Iqcf2), transcript variant 1, mRNA	683				0	-
NM_001423913.1	Rattus norvegicus IQ motif containing F2 (Iqcf2), transcript variant 2, mRNA	578				0	-
NM_001135743.1	Rattus norvegicus BUD23, rRNA methyltransferase and ribosome maturation factor (Bud23), mRNA	1303	GA	TC	GAGTCTGAGACAAGAAGTTGGAAAGTTCCAGGCCTGTCTGGGCTACACAGCAAAAACCTGTC	62	98
NM_145097.2	Rattus norvegicus serpin family A member 4 (Serpina4), mRNA	1554	CC	GA	CCCTTCTTGGTGATATTGTATTCCACCAGCTCCCAGGATATCCTCTTCATGGGGAAGGTGGTCAACCCCACAGCATAGCAGACCTAGGATTAGGTGGTCTGTTACCAGCAGGAGAACGTGACTGGGTAGGCCTGGATATGAATAACTCTGCACCCATGGCTTGGGGTGGGAAAGGGCCCCTGACTCCCAAGAGTGGTAGAGGGAGGCGTGGGGCTAGATGGACTGGAAAGTGGGAGATACCTCCCTGGGGACCACGCTGA	260	296
NM_001109320.1	Rattus norvegicus APC membrane recruitment protein 1 (Amer1), mRNA	3663				0	-
NM_023985.1	Rattus norvegicus tribbles pseudokinase 1 (Trib1), mRNA	1972				0	-
NM_001012195.1	Rattus norvegicus ring finger protein 41 (Rnf41), transcript variant 4, mRNA	2015	GG	AT	GGCTGGTCATGATCTTTGCACATGGTGTGGAGGAGAT	37	73
NM_001106819.1	Rattus norvegicus nicotinamide N-methyltransferase (Nnmt), mRNA	1043	TG	CA	TGGGATCTGAATGACGTCCTGTGATCCCCA	30	66
NM_019192.2	Rattus norvegicus selenoprotein P (Selenop), transcript variant 1, mRNA	2043				0	-
NM_001109416.1	Rattus norvegicus RNA polymerase I subunit G (Polr1g), mRNA	2040				0	-
NM_001083911.1	Rattus norvegicus selenoprotein P (Selenop), transcript variant 2, mRNA	2115				0	-
NM_153721.1	Rattus norvegicus pro-platelet basic protein (Ppbp), mRNA	352				0	-
NM_001109555.1	Rattus norvegicus keratin associated protein 10 like 1 (Krtap10l1), mRNA	1059				0	-
NM_001077676.1	Rattus norvegicus N(alpha)-acetyltransferase 12, NatA catalytic subunit (Naa12), mRNA	1682	GC	TC	GCCATGATCGAGAACTTCAGTGCTAAGTACGTGTCCCTGCATGTCAGGAAGAGCAACCGAGCAGCCTTGCACCTCTATTCCAACACCCTGAACTTCCAGGTCAGTGAGGTGGAGCCCAAGTACTATGCAGATGGCGAAGATGCATATGCTATGAAGCGAGATCTCTCGCAGATGGCGGATGAGCTGAGAAGGCAGCTGGTGCTGAAGAAAGGCAGATACGTGGTTCTGGGTTCCAAGGAGAATCAGGGGAGCACACTTCCTGGTTCTGAAGAGGCCTGTCAGCAGGAGAACCTGGCTGTAGGCGACAGTGGCAGTGATGGCAAAGACAGCACTGATGTCCAAGACAGCTTGCAGACCTTGGGGTCCGCCTCTTAGAGCCTGCCTGAGCACTACAGGTCC…	913	949
NM_001134507.1	Rattus norvegicus urate (5-hydroxyiso-) hydrolase (Urah), mRNA	839				0	-
NM_001109638.1	Rattus norvegicus LY6/PLAUR domain containing 8 like 2 (Lypd8l2), mRNA	1250	TA	AT	TACAGATCAATCTTCTAAT	19	55
NM_001109459.1	Rattus norvegicus protein disulfide isomerase family A, member 6 like 1 (Pdia6l1), mRNA	1219				0	-
NM_001109567.1	Rattus norvegicus RIKEN cDNA 1700013G24 gene like (1700013G24Rikl), mRNA	1047	GA	CT	GACTTCCCTTGGGGAAAGTCTGCATGGGCCGCCCCTACAACTCCAGGTGTGTAGAGACGAGTCACCTGATGAGAGGCTCCAAGGTAGCCAAAAAGCCCACTTGTCATCGGAGCAGCCCTCACTGCCTGATCTGCACAGACCATCCATCGTGCCCATCCAGCCCTACCTTCCTGGATCAACTCATCAAAGGCATCAGTTACTTGGACAGATCCACCAATGTCT	222	258
NM_001024907.1	Rattus norvegicus RIKEN cDNA 4930433I11 gene like (4930433I11Rikl), mRNA	2472				0	-
NM_001108022.1	Rattus norvegicus RIKEN cDNA 2700097009 gene like (2700097O09Rikl), mRNA	1111	GA	GA	GATTTCGATGAATTTACTCAAGATAACAATGACATTATATTGAAGAGCATAGCCACTGACCTTCGGGACTGTTTGCCTATAGAAGCCATGCTTTGCTCAGAACATCTAGCCCTTCAGAAAATACGACAACAGCCAGAACCCACAGTTCACATTGATGCATTCCTCTATGATGAAGACTTTATTGATACATTATGTGAGGAAGGAAAAATGAGCAGAAACTACTGTACAGTGTGTGGCTCACACCAAACAGCGCCTTTGGGATTTATTTCTCATTCCTTCTCCCTCATGGAGTTGAAGTTCATTTATCACCATGTGCTCCCTGATCTGTCAGGAAAGGTCTTGGTTGACGTTGGTTCCAGACTTGGCACAGTCCTTTATGGGGGTTACCTTTACAGCTCA…	691	727
NM_001107087.1	Rattus norvegicus solute carrier family 51 member A (Slc51a), mRNA	1603	GC	GG	GCAGAAACCTCCCCACTCCTCAGTGGTTGTCCCTACCTGACCCTCCTCATCCTCGGCAGCATCTGCCTGAGAGAAAAGAAGGATGGAGCCAGGCAGGACTCATATAAAACTTGACCCCAGGTACACAGCAGATCTTCTGGAGCTGCTGGAAACCAATTACAGCATCTCCCCTGCCTGCTTCTCTCACCCTCCCACTGCAGCCCAGCTCCTGAGAGAATTGGGCTCAGTGGAAATTGCCCTCACCATCATCTTGACCTTTTTTACCATTGGATCAGTTGCCATTTTTCTGGAGGATGCTATTTACCTATACAAGAACACCCTTTGCCCCATCAAGAAGAGGACTCTGATCTGGAGTAGCTCTGCGCCCACGGTGGTGTCTGTGTTCTGCTGCTTTGGTCT…	1187	1223
NM_001110367.1	Rattus norvegicus ferritin, heavy polypeptide-like 17, member B (Fthl17b), mRNA	835				0	-
NM_001109388.1	Rattus norvegicus KIAA0232 homolog (Kiaa0232), mRNA	6715	CG	CA	CGGAGAGTGGGTGGGCCCCAGCAGAGAGGACCTCTTCTCCAGAACACACCTGTGACCCTGCAGAGTAGTAGCAGTCATTGCACATGCTCTGACGGGAGATTGCCCGCTGTGAGGCCTGTTAGTCTAAAGCAGTAACTTAGGCTTCCTCTTCCA	153	189
NM_001109431.1	Rattus norvegicus similar to human chromosome 10 open reading frame 53 (C16h10orf53), mRNA	818	GG	AA	GGGAGCGGACGGAACGCCAGCGATGTCCTCCAGTCTACAGCACCAGCAAAAGATGCTCAGTGGGCACGTAGACGCTGGGCTCTACCAGTTAGAACAAGGCAAGGCCACCTGTCCAGTAGCCTGTCGCGTTTGTGTTTCTTATCTGGCTACATAGGCACCCACAAAAACAATAAAAACTCCTCCCTGGCAGCGTCTCTCAGTCTCCTCCCATAGGGAGAGCCCTCCAATATCAGGTGCACTGGATCTGAAGGAAATAAGAAAATGCAATCTAATAACAGAGCGCCATCCCCTAATAAAGCACCATCGCCAGAAGCATTAGACATTCTATTCTGAATCCGCCATGAACCAGGAACAGGTGAAA	361	397
[truncated: 113,738 more rows]
